# Supplementary material for: AAV9/MFSD8 gene therapy is effective in preclinical models of neuronal ceroid lipofuscinosis type 7 disease
Source: JCI journal article supplement (doi:10.1172/jci146286), 2022-01-13
Supplement: sd3 [file 3]

**FINAL REPORT**

**Testing Facility Study No. 2759-001**

**Sponsor Reference No. CLN7-001**

**A Single Dose Toxicity Study of scAAV9/JeT-hCLN7opt-SV40pA  
Administered by Intrathecal Injection in Rats**

**SPONSOR:**

Foundation for Batten Hope  
3963 Maple Avenue, Suite 390  
Dallas, TX 75219  
USA

**TESTING FACILITY:**

Charles River Laboratories, Inc.  
54943 North Main Street  
Mattawan, MI 49071  
USA

**TABLE OF CONTENTS**

|                                                         | Page |
|---------------------------------------------------------|------|
| TABLE OF CONTENTS                                       | 2    |
| REPORT TEXT                                             | 4    |
| COMPLIANCE STATEMENT AND REPORT APPROVAL                | 4    |
| QUALITY ASSURANCE STATEMENT                             | 5    |
| 1. RESPONSIBLE PERSONNEL                                | 7    |
| 1.1. Testing Facility                                   | 7    |
| 1.2. Individual Scientists (IS) at Testing Facility     | 7    |
| 1.3. Principal Investigators (PI)                       | 7    |
| 2. SUMMARY                                              | 8    |
| 3. INTRODUCTION                                         | 9    |
| 3.1. Study Schedule                                     | 9    |
| 4. MATERIALS AND METHODS                                | 9    |
| 4.1. Test Article and Vehicle Information               | 9    |
| 4.2. Test Article and Vehicle Characterization          | 10   |
| 4.3. Reserve Samples                                    | 10   |
| 4.4. Test Article Inventory and Disposition             | 10   |
| 4.5. Dose Formulation and Analysis                      | 10   |
| 4.6. Test System                                        | 11   |
| 4.7. Experimental Design                                | 12   |
| 4.8. In-life Procedures, Observations, and Measurements | 13   |
| 4.9. Laboratory Evaluations                             | 14   |
| 4.10. Terminal Procedures                               | 15   |
| 5. STATISTICS                                           | 16   |
| 5.1. Group Pair-wise Comparisons (General ANOVA)        | 17   |
| 6. COMPUTER SYSTEMS                                     | 18   |
| 7. RETENTION OF RECORDS, SAMPLES, AND SPECIMENS         | 18   |
| 8. RESULTS                                              | 19   |
| 8.1. Mortality                                          | 19   |
| 8.2. In-life Examinations                               | 19   |
| 8.3. Clinical Pathology                                 | 20   |
| 8.4. Terminal Evaluations                               | 22   |
| 8.5. Biodistribution Evaluations                        | 27   |
| 9. CONCLUSION                                           | 28   |
| 10. REFERENCES                                          | 29   |
| FIGURE                                                  | 30   |

**TABLE OF CONTENTS**

|                                               | Page |
|-----------------------------------------------|------|
| 1. Mean Body Weight Values                    | 30   |
| 2. Mean Body Weight Change Values             | 33   |
| 3. Mean Food Consumption Values               | 36   |
| TABLE                                         | 39   |
| 1. Summary of Detailed Clinical Observations  | 39   |
| 2. Summary of Body Weight Values              | 44   |
| 3. Summary of Body Weight Change Values       | 53   |
| 4. Summary of Caged Food Consumption Values   | 62   |
| 5. Summary of Rotating Rod Values             | 69   |
| APPENDIX                                      | 72   |
| 1. Amended Protocol, Protocol, and Deviations | 72   |
| 2. Test Article Characterization              | 131  |
| 3. Record of Animal Fate and Disposition      | 133  |
| 4. Individual Detailed Clinical Observations  | 142  |
| 5. Individual Body Weight Values              | 153  |
| 6. Individual Body Weight Change Values       | 170  |
| 7. Individual Caged Food Consumption Values   | 187  |
| 8. Individual Rotating Rod Values             | 213  |
| 9. Clinical Pathology Report                  | 222  |
| 10. Pathology Report                          | 340  |
| 11. Biodistribution Analysis Report           | 698  |

### COMPLIANCE STATEMENT AND REPORT APPROVAL

The study was conducted in accordance with the United States (US) Food and Drug Administration (FDA) Good Laboratory Practice (GLP) Regulations, 21 Code of Federal Regulations (CFR) Part 58. Exceptions from the above regulations are listed below.

- The Sponsor has not yet provided documentation of the strength, purity, composition, stability, and other pertinent information for the batch (lot) of vehicle and test article used on study.
- The Fusion v6 Rotating Rod System data was generated by computer software that is not validated.
- The samples for bioanalysis (plasma), CSF, and gene expression (tissues) were not analyzed. If analyzed, the data will be reported separately.

This study was conducted in accordance with the procedures described herein. All deviations authorized/acknowledged by the Study Director are documented in the Study Records. The report represents an accurate and complete record of the results obtained.

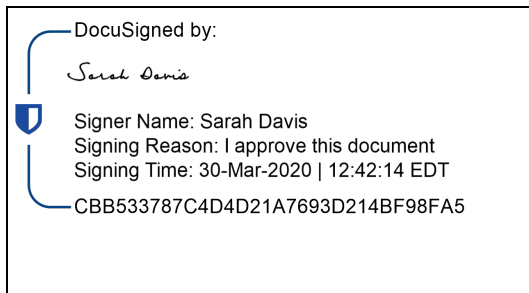

Sarah Davis, BS, LATG  
Study Director

**QUALITY ASSURANCE STATEMENT**

Below are the inspections conducted by the Quality Assurance Unit and the dates the inspections were reported to the Study Director and Testing Facility Management for Study No. 2759-001.

| Date(s) of Inspection    | Study Phase Inspected                              | Date(s) Reported to Study Director and Testing Facility Management |
|--------------------------|----------------------------------------------------|--------------------------------------------------------------------|
| 09/09/2018 to 09/10/2018 | Protocol                                           | 09/10/2018,<br>09/10/2018                                          |
| 09/14/2018 to 09/14/2018 | Test Material Preparation In-process Inspection    | 09/14/2018,<br>09/14/2018                                          |
| 09/18/2018 to 09/19/2018 | Test Material Administration In-process Inspection | 09/19/2018,<br>09/19/2018                                          |
| 10/22/2018 to 10/22/2018 | Protocol Amendment 1                               | 10/24/2018,<br>01/02/2019                                          |
| 12/12/2018 to 12/13/2018 | Protocol Amendment 2                               | 12/13/2018,<br>12/13/2018                                          |
| 12/12/2018 to 12/14/2018 | Fusion Rotating Rod System In-process Inspection   | 12/14/2018,<br>01/02/2019                                          |
| 01/28/2019 to 01/28/2019 | Postmortem Data Review                             | 01/28/2019,<br>01/28/2019                                          |
| 01/28/2019 to 01/28/2019 | Report Tables                                      | 01/28/2019,<br>02/05/2019                                          |
| 02/06/2019 to 02/12/2019 | Postmortem Data Review                             | 02/12/2019,<br>03/12/2019                                          |
| 02/06/2019 to 02/12/2019 | Antemortem Data Review                             | 02/12/2019,<br>02/26/2019                                          |
| 02/06/2019 to 02/12/2019 | Antemortem Report Audit                            | 02/12/2019,<br>02/26/2019                                          |
| 03/12/2019 to 03/12/2019 | Clinical Pathology Report Review                   | 03/12/2019,<br>03/12/2019                                          |
| 03/12/2019 to 03/22/2019 | Postmortem Data Review                             | 03/22/2019,<br>03/25/2019                                          |
| 04/15/2019 to 04/15/2019 | Protocol Amendment 3                               | 04/15/2019,<br>04/15/2019                                          |
| 02/25/2020 to 02/27/2020 | Protocol Amendment 4                               | 02/27/2020,<br>02/27/2020                                          |
| 03/17/2020 to 03/18/2020 | Final Report Review                                | 03/18/2020,<br>03/27/2020                                          |

In addition to the above-mentioned audits, process-based and/or routine facility inspections were also conducted during the course of this study. Inspection findings, if any, specific to this study were reported by Quality Assurance to the Study Director and Management.

DocuSigned by:  
*Shannon Dodes*  
 Signer Name: Shannon Dodes  
Signing Reason: I approve this document  
Signing Time: 30-Mar-2020 | 06:51:05 EDT  
B74EB5E454BA49C2A573D32C16FD2555

Shannon Dodes, BA, LAT, RQAP-GLP  
Quality Assurance Auditor

**1. RESPONSIBLE PERSONNEL****1.1. Testing Facility**

|                                                               |                                  |
|---------------------------------------------------------------|----------------------------------|
| <b>Senior Director, Safety Evaluation</b>                     | Theodore Baird, PhD, DSP         |
| <b>Senior Director,<br/>Bioanalytical/Analytical Sciences</b> | Amy Smith, BA                    |
| <b>Senior Director, DMPK</b>                                  | Clint Rosenfeld, PhD             |
| <b>Director, Operations</b>                                   | Kurt Willmont, BS, LAT           |
| <b>Associate Director, Regulatory<br/>Compliance</b>          | Janis Kissel, BS, RQAP-GLP       |
| <b>Study Director</b>                                         | Sarah Davis, BS, LATG            |
| <b>Supervisor, Surgery and Efficacy</b>                       |                                  |
| <b>Supervisor, Toxicology<br/>Services</b>                    | Jessica Haynes, BS, LAT          |
| <b>Executive Director, Attending<br/>Veterinarian</b>         | Dale Cooper, DVM, MS, DACLAM     |
| <b>Report Coordinator</b>                                     | Michael Westover, BAA, MBA       |
| <b>Quality Assurance Auditor</b>                              | Shannon Dodes, BA, LAT, RQAP-GLP |

**1.2. Individual Scientists (IS) at Testing Facility****Staff Veterinarians**

Scott Adrian, DVM  
Michael Bradley, BS, DVM  
April George, DVM  
Jennifer Kylie, BSCh, BVM&S, DVS, DACLAMc  
Jesse Veenstra, DVM

**Individual Scientist,  
Clinical Pathology**

Caitlyn Carter, DVM, DACVP

**1.3. Principal Investigators (PI)****Serum, CSF, qPCR, and RT-qPCR  
Evaluations**

Steven J Gray, PhD  
University of Texas Southwestern Medical  
Center-Gray Lab  
6000 Harry Hines BLVD  
NA02.508  
Dallas, TX 75390

**Anatomic Pathology**

Odete R. Mendes, DVM, PhD, DACVP, DABT  
Charles River Laboratories, Inc.  
4025 Stirrup Creek Drive  
Suite 150  
Durham, NC 27703

**2. SUMMARY**

The objective of this study was to further characterize the toxicity, biodistribution, and gene expression of the test article, scAAV9/JeT-hCLN7opt-SV40pA (also known as CLN-7), following a single intrathecal (IT) injection in CD<sup>®</sup>[CrI:CD<sup>®</sup>(SD)] rats. The test article is being developed for treatment of the neurodegenerative Batten Disease (CLN7 subtype). The study design was as follows:

Text Table 1  
Experimental Design

| Group No. | Dose Level<br>(vg/animal) | Dose Concentration<br>(vg/ $\mu$ L) | Dose Volume<br>( $\mu$ L) | No. of Animals    |   |                    |   |                    |   |
|-----------|---------------------------|-------------------------------------|---------------------------|-------------------|---|--------------------|---|--------------------|---|
|           |                           |                                     |                           | Necropsy<br>Day 8 |   | Necropsy<br>Day 29 |   | Necropsy<br>Day 91 |   |
|           |                           |                                     |                           | M                 | F | M                  | F | M                  | F |
| 1         | 0                         | 0                                   | 60                        | 5                 | 5 | 5                  | 5 | 5                  | 5 |
| 2         | $5 \times 10^{11}$        | $2.5 \times 10^{10}$                | 20                        | 5                 | 5 | 5                  | 5 | 5                  | 5 |
| 3         | $2 \times 10^{12}$        | $1 \times 10^{11}$                  | 20                        | 5                 | 5 | 5                  | 5 | 5                  | 5 |
| 4         | $6 \times 10^{12}$        | $1 \times 10^{11}$                  | 60                        | 5                 | 5 | 5                  | 5 | 5                  | 5 |

M-Male

F-Female

The following parameters and end points were evaluated in this study: mortality, clinical observations, body weight, and food consumption, clinical pathology parameters (hematology, coagulation, and clinical chemistry), gross necropsy findings, organ weights, and histopathologic examinations, fusion v6 rotating rod system evaluation, serum and CSF analysis, biodistribution and gene expression analysis by qPCR and RT-qPCR. Exploratory serum and CSF analysis, as well as gene expression analysis, will be reported separately as needed.

Administration of the scAAV9/JeT-hCLN7opt-SV40pA was not associated with any mortality, clinical observations, accelerating rotarod values, bodyweight or food consumption changes. All animals survived to their scheduled terminal necropsies.

Single intrathecal injections of scAAV9/JeT-hCLN7opt-SV40pA to Sprague Dawley rats at Low Dose ( $5 \times 10^{11}$  vg/animal), Mid Dose ( $2 \times 10^{12}$  vg/animal) or High Dose ( $6 \times 10^{12}$  vg/animal) levels on Day 1 with an observation period through Day 91 resulted in test article-related increases in lymphocyte counts in both sexes at the Mid and High dose levels with concomitant increases in total leukocyte counts, which tended to partially resolve by the end of the observation period except in females at the High Dose levels. Additionally, males administered the High Dose level had a test article-related increase in fibrinogen concentration that had resolved by the end of the observation period. Males administered Mid and High Dose levels and females administered Low, Mid, and High Dose levels also had test article-related increases in globulin concentrations, which had partially resolved by the end of the observation period at the Low and Mid Dose



levels but persisted in both sexes at the High Dose level. These changes were collectively suggestive of a minor immune or inflammatory stimulus, which lacked definitive microscopic correlates.

Males administered the Low, Mid, and High Dose levels also had test article-related decreases in triglyceride concentrations that had resolved by the end of the observation period and lacked microscopic correlates.

Intrathecal administration of scAAV9/JeT-hCLN7opt-SV40pA once on Day 1 to rats at doses of 0,  $5 \times 10^{11}$ ,  $2 \times 10^{12}$  or  $6 \times 10^{12}$  vg/animal with an observation period of up to 91 days resulted in no unscheduled deaths. There were no test article-related macroscopic findings. There were no microscopic changes directly attributable to the administration of scAAV9/JeT-hCLN7opt-SV40pA.

Therefore, within the duration and design of this study the no-observed-adverse-effect-level (NOAEL) was  $6 \times 10^{12}$  vg/animal of scAAV9/JeT-hCLN7opt-SV40pA.

### 3. INTRODUCTION

Due to the acquisition of MPI Research by Charles River, the name of the MPI Research facility in Mattawan, Michigan has been changed to Charles River Laboratories, Inc., 54943 North Main Street, Mattawan, MI 49071, USA. Study documents may contain both names and both names are considered equivalent and may be used as the name of MPI Research transitions to Charles River.

The objective of this study was to further characterize the toxicity, biodistribution, and gene expression of the test article, scAAV9/JeT-hCLN7opt-SV40pA. The test article is being developed for treatment of the neurodegenerative Batten Disease (CLN7 subtype).

The design of this study was based on the current International Council for Harmonisation (ICH) Harmonised Tripartite Guidelines and generally accepted procedures for the testing of pharmaceutical compounds<sup>1</sup> and in accordance with the *Guide for the Care and Use of Laboratory Animals* from the National Research Council.<sup>2</sup> The study protocol, the last amended study protocol, and deviations are presented in [Appendix 1](#).

#### 3.1. Study Schedule

|                                     |             |
|-------------------------------------|-------------|
| Study Initiation Date               |             |
| (Protocol Signed by Study Director) | 07 Sep 2018 |
| Experimental Start Date             |             |
| (First Day of Dose Administration)  | 14 Sep 2018 |
| Experimental Termination Date       |             |
| (Last Animal Removed from Study)    | 08 Jan 2019 |

### 4. MATERIALS AND METHODS

#### 4.1. Test Article and Vehicle Information

##### 4.1.1. Test Article

|                  |                                                  |
|------------------|--------------------------------------------------|
| Identification:  | scAAV9/JeT-hCLN7opt-SV40pA (also known as CLN-7) |
| Batch (Lot) No.: | MSJ-18-01-16-2                                   |
| Receipt Date:    | 12 Sep 2018                                      |

Expiration Date: Not Available  
Physical Description: Clear, colorless frozen liquid  
Storage Conditions: Frozen at -60°C to -90°C, protected from light  
Supplier: Vigene Biosciences Inc

#### **4.1.2. Vehicle**

Identification: Placebo  
Batch (Lot) No.: MSJ-18-01-17-1  
Receipt Date: 12 Sep 2018  
Expiration Date: Not Available  
Physical Description: Clear, colorless frozen liquid  
Storage Conditions: Frozen at -60°C to -90°C, protected from light  
Supplier: Vigene Biosciences Inc

#### **4.2. Test Article and Vehicle Characterization**

The Sponsor has not provided to the Testing Facility documentation of the identity, strength, purity, composition, and stability for the vehicle or test article. A Certificate of Analysis has not been provided to the Testing Facility and as presented in [Appendix 2](#).

#### **4.3. Reserve Samples**

For the batch (lot) of control and test article, a reserve sample was collected and maintained under the appropriate storage conditions by the Testing Facility.

#### **4.4. Test Article Inventory and Disposition**

Records of the receipt, distribution, and storage of test and control articles were maintained. With the exception of reserve samples, all unused test article was discarded after completion of the study.

#### **4.5. Dose Formulation and Analysis**

##### **4.5.1. Preparation of Vehicle**

Fresh vehicle, isotonic phosphate-buffered saline containing 5% w/v sorbitol, was used as received from the Vigene Biosciences, Inc., Rockville, Maryland. The vehicle was removed from frozen storage and allow to thaw at controlled room temperature prior to formulation preparation or dosing, stored refrigerated (2°C to 8°C), and used within 2 weeks.

##### **4.5.2. Preparation of Test Article**

The test article, scAAV9/JeT-hCLN7opt-SV40pA (also known as CLN-7), was used as received from the Vigene Biosciences, Inc., Rockville, Maryland. No adjustment was made for purity. The high and middle doses were administered neat (undiluted). The test article was removed from frozen storage and allowed to thaw at controlled room temperature prior to formulation preparation or dosing, stored refrigerated (2°C to 8°C), and used within 2 weeks after thawing.

Biosafety Level 2 (BSL2) procedures were observed during dose formulation preparation in accordance with Testing Facility BLS2 Policy.

On the day of dosing, using sterile equipment, and aseptic techniques, formulations of test article for low dose, Group 2, were prepared by mixing the appropriate amount of vehicle with the appropriate amount of test article to achieve a nominal concentration of  $2.5 \times 10^{10}$  vg/ $\mu$ L. The low dose was diluted 1:4 (i.e. 1 part test article and 3 parts vehicle). Test article was mixed by inversion 5 times prior to being added to vehicle. The test article formulations were dispensed into polypropylene containers, inverted 10 times, and stored on wet ice under refrigeration prior to use.

On occasion, additional preparations were made due to insufficient amounts dispensed during the course of the study.

#### **4.6. Test System**

##### **4.6.1. Receipt**

From 07 Sep 2018 to 19 Dec 2018, 138 experimentally naïve CD<sup>®</sup>[CRL:CD<sup>®</sup>(SD), rats (69/sex) were received from Charles River Laboratories, Raleigh, North Carolina or Charles River Kingston, Stone Ridge, New York. At the initiation of dosing, the animals assigned to study were approximately 8 to 9 weeks old and weighed between 165 g and 328 g.

##### **4.6.2. Justification for Test System and Number of Animals**

The current state of scientific knowledge and the applicable guidelines cited previously in this protocol did not provide acceptable alternatives, in vitro or otherwise, to the use of live animals to accomplish the purpose of this study. “The development of knowledge necessary for the improvement of the health and well-being of humans as well as other animals requires in vivo experimentation with a wide variety of animal species.”<sup>3</sup> “Whole animals are essential in research and testing because they best reflect the dynamic interactions between the various cells, tissues, and organs comprising the human body.”<sup>4</sup>

The rat is the usual rodent model<sup>5</sup> used for evaluating the toxicity of various classes of chemicals and for which there is a large historical database.

##### **4.6.3. Animal Identification**

At study assignment, each animal was identified using a subcutaneously implanted electronic identification chip.

##### **4.6.4. Environmental Acclimation**

During the 7 to 11-day acclimation period, the animals were observed daily with respect to general health and any signs of disease.

##### **4.6.5. Selection, Assignment, Replacement, and Disposition of Animals**

Animals were assigned to study groups by a standard, by weight, randomization procedure designed to achieve similar group mean body weights. Animals assigned to study had body weights within  $\pm 20\%$  of the mean body weight for each sex.

#### **4.6.6. Husbandry**

##### **4.6.6.1. Housing**

The animals were pair or group-housed in solid bottom cages with nonaromatic bedding. The housing was equipped with an automatic watering valve as specified in the *USDA Animal Welfare Act* (9 CFR, Parts 1, 2 and 3) and as described in the *Guide for the Care and Use of Laboratory Animals*.<sup>2</sup> Each cage was clearly labeled with study, group, animal number, and sex.

##### **4.6.6.2. Environmental Conditions**

Target temperatures of 68°F to 79°F with a relative target humidity of 30% to 70% were maintained. A 12-hour light/12-hour dark cycle was maintained, except when interrupted for designated procedures. Ten or greater air changes per hour with 100% fresh air (no air recirculation) were maintained in the animal rooms.

##### **4.6.6.3. Food**

Lab Diet® (Certified Rodent Diet #5002, PMI Nutrition International, Inc.) was provided ad libitum except during designated procedures. The feed was analyzed by the supplier for nutritional components and environmental contaminants. Results of the analysis are provided by the supplier and are on file at the Testing Facility. It is considered that there are no known contaminants in the feed that would interfere with the objectives of the study.

##### **4.6.6.4. Water**

Tap water was available ad libitum to each animal via an automatic watering system (except during designated procedures). Periodic analysis of the water is performed, and results of these analyses are on file at the Testing Facility. It is considered that there are no known contaminants in the water that could interfere with the outcome of the study.

##### **4.6.6.5. Animal Enrichment**

Psychological/environmental enrichment was provided according to SOP.

##### **4.6.6.6. Veterinary Care**

Veterinary care was available throughout the course of the study, and animals were examined by the veterinary staff as warranted by clinical signs or other changes. All veterinary examinations and recommended therapeutic treatments, if any, were documented in the study records and reviewed by the Study Director. The medical treatments and observations recorded after initiation of dosing are not reported but are maintained in the study file.

#### **4.7. Experimental Design**

##### **4.7.1. Administration of Test Materials**

The vehicle and test article were administered once on day of dosing via slow bolus intrathecal injection. The dose levels were 0,  $5 \times 10^{11}$ ,  $2 \times 10^{12}$ , and  $6 \times 10^{12}$  vg/animal and administered at a dose volume of 20 or 60  $\mu$ L. The control group received the vehicle in the same manner as the treated groups. Prior to dosing, vehicle or test article was warmed at controlled room temperature for 15 to 30 minutes and dosed within 2 hours. BLS2 procedures were observed during test article administration.

Prior to the first dose the needle was primed: the syringe (with a 26 gauge Hamilton needle attached) was filled with vehicle or test article. The Hamilton needle was removed, the Lasse needle attached, and the vehicle or test article flushed through the needle. The syringe was then filled with the dose after the needle was primed.

The animal was anesthetized to effect with isoflurane using a precision vaporizer and placed in ventral recumbency. A single intrathecal dose was administered with a 27 gauge Lasse needle and 100  $\mu$ L gas tight Hamilton syringe. A small incision was made to assist needle placement. Under fluoroscopic guidance, the needle was inserted into the lumbar cistern. Animals were returned to their cages and allowed to recover following dosing.

#### **4.7.2. Justification of Route and Dose Levels**

The dose level was selected by the Sponsor, or in consultation with the Sponsor, on the basis of available data from previous studies and discussion with the FDA in a preIND meeting. The low and middle doses had been tolerated well in pilot mouse studies, and the middle dose was the target dose to model the proposed clinical dose in CLN7 patients. The middle dose had shown sufficient to improve pathological signatures of the disease in mice. Per the discussion with the FDA, we were advised to bracket the “middle” target dose with lower and higher doses to complete the dose-responsive nature of any effect. Intrathecal injection is the intended route of administration of this test article in humans.

### **4.8. In-life Procedures, Observations, and Measurements**

#### **4.8.1. Cage Side Observations**

All animals were observed for morbidity, mortality, injury, and the availability of food and water twice daily, once in the morning and once in the afternoon. Animals were not removed from the cage during observation, unless necessary for identification or confirmation of possible findings.

#### **4.8.2. Detailed Clinical Observations**

The animals were removed from the cage, and a detailed clinical examination of each animal was performed during the acclimation period (as needed), pretreatment, and weekly during the study (for deviations see [Appendix 1](#)). On occasion, clinical observations were recorded at unscheduled intervals. The examinations performed during the acclimation period are not reported but are maintained in the study file. The observations included, but were not limited to, evaluation of the skin, fur, eyes, ears, nose, oral cavity, thorax, abdomen, external genitalia, limbs and feet, respiratory and circulatory effects, autonomic effects such as salivation, and nervous system effects including tremors, convulsions, reactivity to handling, and unusual behavior.

#### **4.8.3. Body Weights**

Body weights for all animals were measured and recorded within 3 days of arrival, prior to randomization, Day 1, and weekly during the study (for deviations see [Appendix 1](#)). The body weights recorded within 3 days of arrival and prior to randomization are not reported but are maintained in the study file.

#### **4.8.4. Food Consumption**

Food consumption (per cage) was measured and recorded weekly throughout the study (for deviations see [Appendix 1](#)).

#### **4.8.5. Fusion v6 Rotating Rod System**

All animals scheduled for Day 29 and Day 91 necropsy were evaluated using the Acuscan EzRod rotating rod system using Fusion v6 software.

Prior to testing, a training session was conducted. The animal was placed on a rotating rod set at a constant speed of -4 rotations per minute (rpm) for 3 minutes (the negative sign indicates direction, in this case the animal ambulates away from the observer). Animals that fell off during session were placed back on the rotating rod until 3 minutes was completed. Data from the training sessions are not reported but are maintained in the study file.

For testing runs, the apparatus was set to accelerate from -4 rpm to -40 rpm over the course of 3 minutes. The acceleration profile was set up so that at 0.1 seconds after the trial was started (chamber button was pushed), the rod was rotating at -4 rpm and at 180.1 seconds the rotating rod was rotating at -40 rpm. The rod accelerated at a rate of 0.2 revolutions per second for 3 minutes. The elapsed time from the start of the trial to the animal's fall and the speed of the rod at that time was recorded digitally by the instrument. Each animal performed 3 trials with at least 15 minutes between trials.

Testing was initiated by pushing the chamber button then placing the rat on the rotating rod. If the animal fell but failed to trigger the sensors to terminate the run, the observer immediately terminated the run manually and was considered a valid run.

In the event the animal didn't fall but the run was terminated unexpectedly by the apparatus, the run was considered invalid and a re-run phase was initiated to retest the animal immediately. If the animal clung to the rod for two consecutive rotations, the testing session was stopped manually by the observer and was considered a valid run.

### **4.9. Laboratory Evaluations**

#### **4.9.1. Clinical Pathology**

Clinical pathology evaluations were conducted on all animals at termination. The materials and methods are described in [Appendix 9](#).

Bone marrow smears were collected and preserved.

#### **4.9.2. Bioanalysis**

##### **4.9.2.1. Bioanalytical Sample Collection**

Blood samples (approximately 0.6 mL to 1 mL) were collected at termination from all animals via the abdominal vessel vena cava after carbon dioxide inhalation for determination of the serum concentrations of the test article. The animals were not fasted prior to blood collection, with the exception of the intervals that coincided with fasting for clinical pathology collections. For deviations see [Appendix 1](#).

##### **4.9.2.2. Bioanalytical Sample Processing**

Blood samples were collected in serum separator tubes and centrifuged at controlled room temperature. The resulting serum was divided into 3 aliquots (approximately 100  $\mu$ L) in pre-labeled cryovials. On occasion, aliquots were stored on dry ice prior to final frozen storage. All aliquots were stored frozen at -60°C to -90°C within 60 minutes of centrifugation. For deviations see [Appendix 1](#).

#### **4.9.2.3. Bioanalytical Sample Analysis**

Samples were shipped on dry ice to University of Texas Southwestern Medical Center-Gray Lab, Dallas, Texas, for possible analysis. If a sample analysis is conducted, the data will be reported separately.

#### **4.9.3. Cerebrospinal Fluid (CSF) Collection and Analysis**

CSF samples (maximum attainable) were collected from all animals at scheduled termination via the cisterna magna. CSF samples were collected in 2 approximately equal aliquots in pre-labeled cryovials. On occasion, aliquots were stored on dry ice prior to final frozen storage. All aliquots were stored frozen at -60°C to -90°C. For deviations see [Appendix 1](#).

Samples were shipped on dry ice to the Laboratory of Dr. Steven Gray, University of Texas Southwestern Medical Center-Gray Lab, Dallas, Texas, for possible future analysis. If a sample analysis is conducted, the data will be reported separately.

#### **4.10. Terminal Procedures**

Postmortem study evaluations were performed on animals at the scheduled terminal necropsies.

##### **4.10.1. Macroscopic**

Necropsy examinations were performed under procedures approved by a veterinary pathologist. The animals were examined carefully for external abnormalities including palpable masses. The skin was reflected from a ventral midline incision and subcutaneous masses were identified and correlated with antemortem findings. The abdominal, thoracic, and cranial cavities were examined for abnormalities. The organs were removed, examined, and, where required, placed in fixative. The pituitary was fixed in situ. All designated tissues were fixed in neutral buffered formalin, except for the eyes (including the optic nerve) and testes, which were fixed using a modified Davidson's fixative<sup>6</sup> prior to placement in formalin. Tissue samples collected for analysis of the test article concentrations were not placed in fixative. Formalin was infused into the lung via the trachea and into the urinary bladder. A full complement of tissues and organs was collected from all animals.

##### **4.10.2. Organ Weights**

Body weights and protocol-designated organ weights were recorded for all surviving animals at the scheduled necropsies and appropriate organ weight ratios were calculated (relative to body and brain weights). Paired organs were weighed together. A combined weight for the thyroid and parathyroid glands was collected. Only the right mandibular salivary gland was weighed.

##### **4.10.3. Microscopic**

Fixed hematoxylin and eosin-stained paraffin sections from protocol-designated sections of tissues were processed to slide and all required slides were shipped under ambient condition to Charles River Laboratories, Inc., Durham, North Carolina for microscopic evaluation.

The spinal cord was opened up to remove bilateral DRG's (including nerve roots, when possible) from the cervical, thoracic, and lumbar regions of the spinal column. The DRG's were submitted for processing in individual tissue cassettes and left and right orientation maintained. Spinal sections adjacent to the harvested DRG's were trimmed and submitted for processing.



#### 4.10.4. Biodistribution and Gene Expression Evaluations

Tissue samples were collected from the brain (at least 3 coronal cross sections: hindbrain including brainstem and cerebellum, midbrain, and forebrain), heart, kidney, liver, lung, lymph node (mandibular and mesenteric), skeletal muscle (bicep femoris and gastrocnemius), ovary, cervical spinal cord (including DRG and nerve roots), thoracic spinal cord (including DRG and nerve roots), lumbar spinal cord (including DRG and nerve roots), and testes of all animals for analysis of the test article concentrations. Each organ/tissue sample was divided in half; one half for DNA purification and the other half for RNA purification. When possible, duplicated samples were collected (4 total per tissue/organ) as long as each sample was  $\geq 10$  mg.

Samples for DNA analysis were collected using strict aseptic techniques and disposable instruments for each tissue or organ. Gloves were changed between collection and dissection of each tissue for PCR analysis. Non-disposable instruments and cutting board were wiped down with 10% bleach solution, rinsed with water, and wiped down with 100% ethanol between each of the specified organs. Samples for PCR were collected prior to sample collection for any other parameters. Samples of organs or tissues collected for qPCR were placed in pre-labeled 2 mL microfuge tubes (1 tube/sample), snap-frozen in liquid nitrogen, and store frozen at  $-60^{\circ}\text{C}$  to  $-90^{\circ}\text{C}$ . Samples collected for RT-qPCR analysis of the transgene mRNA were completely immersed into pre-labeled 2 mL microfuge pre-filled with 1.5 mL RNALater. Samples were stored refrigerated ( $2^{\circ}\text{C}$  to  $8^{\circ}\text{C}$ ) for up to 24 hours, RNALater removed, and stored frozen ( $-60^{\circ}\text{C}$  to  $-90^{\circ}\text{C}$ ).

Samples were shipped on dry ice to the Laboratory of Dr. Steven Gray, University of Texas Southwestern Medical Center-Gray Lab, Dallas, Texas, for analysis. Samples for gene expression via RT-qPCR were not analyzed. If analyzed, the data will be reported separately. All analytical work will be conducted by the Laboratory of Dr. Steven Gray using an analytical method to be added by amendment if analysis is conducted.

## 5. STATISTICS

[Text Table 2](#) defines the set of comparisons used in the statistical analyses described in this section.

Text Table 2  
Statistical Comparisons

| Control Group | Treatment Group |
|---------------|-----------------|
| 1             | 2, 3, 4         |

The raw data were tabulated within each time interval, and the mean and standard deviation were calculated for each endpoint by sex and group. For each endpoint, treatment groups were compared to the control group using the analysis outlined in [Text Table 3](#).



Text Table 3  
Statistical Analysis

| Endpoints                          | Type of Analysis                               |
|------------------------------------|------------------------------------------------|
| Body Weights                       | Group Pair-wise Comparisons<br>(General ANOVA) |
| Body Weight Change                 |                                                |
| Food Consumption                   |                                                |
| Hematology                         |                                                |
| Coagulation                        |                                                |
| Clinical Chemistry                 |                                                |
| Urinalysis                         |                                                |
| Urine Volume                       |                                                |
| Specific Gravity                   |                                                |
| pH                                 |                                                |
| Organ Weights                      |                                                |
| Absolute Weights                   |                                                |
| Relative to Body and Brain Weights |                                                |

### 5.1. Group Pair-wise Comparisons (General ANOVA)

Included below are the details of the statistical routines that were applied to the data, dependent on the data specific assumptions outlined as part of the routine. The actual analysis performed for each endpoint and collection interval is included in the summary tables. The experimental unit for the analysis of food consumption was cage, while for all other endpoints the experimental unit was the individual animal. Food consumption was calculated as described in the Testing Facility SOP.

If the control group had a sample size less than three, no inferential statistics were calculated. If a particular endpoint and/or parameter within a given collection interval had the same value across all experimental units, no inferential statistics were calculated.

For endpoints and/or parameters where all groups with sample sizes of three or greater were included, the normality of the residuals and homogeneity of variances were tested to determine if the data were approximately normal or if a log transformation or rank transformation was required. Levene's test<sup>7</sup> was used to assess homogeneity of group variances and Shapiro-Wilk's<sup>8</sup> test was used to test the normality of the residuals.

For the raw data, if Levene's test was not significant ( $p \geq 0.01$ ) and Shapiro-Wilk's test was not significant ( $p \geq 0.01$ ), then a normal distribution was used. If either the Levene's test was significant ( $p < 0.01$ ) or Shapiro-Wilk's test was significant ( $p < 0.01$ ), normality and homogeneity of variances were tested with a log transformation used on the data.

For the log transformed data, if Levene's test was not significant ( $p \geq 0.01$ ) and Shapiro-Wilk's test was not significant ( $p \geq 0.01$ ), then a log normal distribution was used. If either the Levene's test was significant ( $p < 0.01$ ) or Shapiro-Wilk's test was significant ( $p < 0.01$ ), then a rank transformation was used on the data.

For raw or log transformed data, a one way analysis of variance was used to test each endpoint for the effects of treatment<sup>9</sup>. If the treatment effect was significant ( $p < 0.05$ ), linear contrasts were constructed for a Dunnett's<sup>9</sup> pair-wise comparison of treatment groups as described above.

For rank transformed data, a Kruskal-Wallis test was used to test each endpoint for the effects of treatment<sup>9</sup>. If the treatment effect was significant ( $p < 0.05$ ), a non-parametric Dunn's<sup>9</sup> pair-wise comparison test of each treatment group with the control group was performed.

Results of all pair-wise comparisons are reported at the 0.05 and 0.01 significance levels. All endpoints were analyzed using two-tailed tests.

## 6. COMPUTER SYSTEMS

Critical computerized systems used in the study are listed below or presented in the appropriate Phase Report. All computerized systems used in the conduct of this study have been validated; when a particular system has not satisfied all requirements, appropriate administrative and procedural controls were implemented to assure the quality and integrity of data.

Text Table 4  
Critical Computerized Systems

| System Name                                            | Version No. | Description of Data Collected and/or Analyzed                                                                                                                                                                |
|--------------------------------------------------------|-------------|--------------------------------------------------------------------------------------------------------------------------------------------------------------------------------------------------------------|
| Logbook                                                | 5.3         | Electronic notebook and data collection system for veterinary communications, observations, and treatments.                                                                                                  |
| MPI Research ExyLIMS                                   | 3.0         | A comprehensive laboratory information management system used to manage data, including but not limited to: instrumentation, test articles, standards, and samples.                                          |
| NextDocs®                                              | 6.1         | Electronic documentation management of Deviation Events and Corrective and Preventative Actions (CAPA).                                                                                                      |
| Provantis™                                             | 8.7, 9.4    | Client-server, Oracle-based system used for electronic documentation and data management from compound receipt through reporting.                                                                            |
| SAS®                                                   | 9.2, 9.3    | The SAS® System is an integrated system of software products that enables a user to perform data entry, retrieval, data management, reporting, graphics, statistical analysis, and applications development. |
| SAS/STAT®                                              | 14.1        | Software used for statistical procedures.                                                                                                                                                                    |
| R                                                      | 3.5.1       | Software used for statistical procedures.                                                                                                                                                                    |
| Siemens Environmental Monitoring                       | 3.11        | Environmental monitoring, alarming, and reporting applications.                                                                                                                                              |
| Niagara Framework® Software System                     | 2.3         |                                                                                                                                                                                                              |
| Acuscan EZRod System with Fusion v6 Superflex Edition: | 3.0         | Software used to record data for the Acuscan EZRod system.                                                                                                                                                   |

## 7. RETENTION OF RECORDS, SAMPLES, AND SPECIMENS

All study-specific raw data, documentation, records, protocol, samples, specimens, and final reports from this study were archived at the Testing Facility. At least one year after issue of the draft report, the Sponsor will be contacted. Data and specimens shipped to the Sponsor or Sponsor-designated location for Biodistribution were maintained by University of Texas Southwestern Medical Center-Gray Lab. Details regarding the retention of the materials were provided to the Study Director for inclusion in the Final Report.

## 8. RESULTS

### 8.1. Mortality

A record of animal fate and disposition is presented in [Appendix 3](#).

All animals survived to the scheduled necropsy.

### 8.2. In-life Examinations

#### 8.2.1. Detailed Clinical Observations

Detailed clinical observations are summarized in [Table 1](#). Individual detailed clinical observations are presented in [Appendix 4](#).

There were no scAAV9/JeT-hCLN7opt-SV40pA-related clinical observations. Clinical findings that were observed were not considered to be test article-related. These observations were generally sporadic, low in frequency, lacked dose-dependency, were considered injury or blood collection-related, occurred at similar frequency to controls, and/or were considered incidental as common findings in rats of this strain/age.

On a few occasions, loss of skin elasticity was observed and was due to dehydration from a sipper that was flowing too slowly. This was observed on only a single occasion per affected cage: animal number 1504 and 1505 during week 7, animal number 2005 during week 3, and animal number 3003 during week 9.

On occasion, veterinary observations were conducted during the course of the study for health monitoring purposes. In general, veterinary observations were similar to, and supported by, the detailed clinical observations.

#### 8.2.2. Body Weight

Body weight data are illustrated in [Figure 1](#) and summarized in [Table 2](#). Individual body weight values are presented in [Appendix 5](#). Body weight change data are illustrated in [Figure 2](#) and summarized in [Table 3](#). Individual body weight change values are presented in [Appendix 6](#).

There was no scAAV9/JeT-hCLN7opt-SV40pA -related effect on body weight.

Mean body weight gains in treated males and females were similar to the IT vehicle controls. Occasional differences from controls were noted but were of low magnitude and considered to reflect normal biological variation. In a few instances body weight losses and subsequent gains the following week were noted and were due to dehydration from a sipper that was flowing too slowly. This was observed on only a single occasion per affected cage: Animal No. 1504 and 1505 (cage 8) on Day 43, Animal No. 2004 and 2005 (cage 14) on Day 15, Animal No. 3001 and 3002 (cage 25) on Day 64, and Animal No. 3003, 3004, and 3005 (cage 26) on Day 60.

#### 8.2.3. Food Consumption

Food consumption data are illustrated in [Figure 3](#) and summarized in [Table 4](#). Individual caged food consumption values are presented in [Appendix 7](#).

There was no scAAV9/JeT-hCLN7opt-SV40pA-related effect on food consumption. Food consumption was similar among treatment groups and controls. Occasional differences from controls were noted but were of low magnitude and considered to reflect normal biological variation. In a few instances decreases in food consumption were noted and were due to dehydration from a sipper that was flowing too slowly. This was observed on only a single

occasion per affected cage: Animal No. 1504 and 1505 (cage 8) on Day 43, Animal No. 2004 and 2005 (cage 14) on Day 15, Animal No. 3001 and 3002 (cage 25) on Day 64, and Animals No. 3003, 3004, and 3005 (cage 26) on Day 60.

#### **8.2.4. Fusion v6 Rotating Rod System**

Fusion v6 Rotating Rod System data are summarized in [Table 5](#). Fusion v6 Rotating Rod System evaluations are presented in [Appendix 8](#).

No test article-related effects were observed following the administration of scAAV9/JeT-hCLN7opt-SV40pA. Accelerating rotarod values were similar across all groups.

### **8.3. Clinical Pathology**

The Clinical Pathology Report is presented in [Appendix 9](#).

#### **8.3.1. Summary**

Single intrathecal injections of scAAV9/JeT-hCLN7opt-SV40pA to Sprague Dawley rats at Low Dose ( $5 \times 10^{11}$  vg/animal), Mid Dose ( $2 \times 10^{12}$  vg/animal) or High Dose ( $6 \times 10^{12}$  vg/animal) levels on Day 1 with an observation period through Day 91 resulted in test article-related increases in lymphocyte counts in both sexes at the Mid and High dose levels with concomitant increases in total leukocyte counts, which tended to partially resolve by the end of the observation period except in females at the High Dose levels. Additionally, males administered the High Dose level had a test article-related increase in fibrinogen concentration that had resolved by the end of the observation period. Males administered Mid and High Dose levels and females administered Low, Mid, and High Dose levels also had test article-related increases in globulin concentrations, which had partially to fully resolved by the end of the observation period at the Low and Mid Dose levels but persisted in both sexes at the High Dose level. These changes were collectively suggestive of a minor immune or inflammatory stimulus, which lacked definitive microscopic correlates.

Males administered the Low, Mid, and High Dose levels also had test article-related decreases in triglyceride concentrations that had resolved by the end of the observation period and lacked microscopic correlates.

#### **8.3.2. Hematology**

[Table 1](#) and [Appendix 1](#) of the Clinical Pathology Report.

On Days 8, 29, and 91 in both sexes at the Mid Dose and High Dose there were minimal to mild increases in mean lymphocyte counts with concomitant increases in mean total leukocyte counts, as illustrated in Text Table 4. These changes tended to be most pronounced on Day 29, except in High Dose females that had the most pronounced change on Day 91. These changes were considered test article-related. Along with increases in fibrinogen concentrations (see [Section 8.3.3](#)) and globulin concentrations (see [Section 8.3.4](#)), these changes were collectively suggestive of a minor immune or inflammatory stimulus, which lacked definitive microscopic correlates.

Text Table 4  
scAAV9/JeT-hCLN7opt-SV40pA-Related Hematology Changes

| Group<br>Dose Level<br>Sex                                                                                                                                                                                             | 2             |               | 3             |               | 4              |                |
|------------------------------------------------------------------------------------------------------------------------------------------------------------------------------------------------------------------------|---------------|---------------|---------------|---------------|----------------|----------------|
|                                                                                                                                                                                                                        | Low Dose<br>M | Low Dose<br>F | Mid Dose<br>M | Mid Dose<br>F | High Dose<br>M | High Dose<br>F |
| <b>Lymphocytes</b>                                                                                                                                                                                                     |               |               |               |               |                |                |
| Day 8                                                                                                                                                                                                                  | —             | —             | 1.24x         | 1.18x         | 1.18x          | 1.16x          |
| Day 29                                                                                                                                                                                                                 | —             | —             | 1.54x         | 1.33x         | 1.71x          | 1.20x          |
| Day 91                                                                                                                                                                                                                 | —             | —             | 1.20x         | 1.30x         | 1.25x          | 1.67x          |
| <b>Total Leukocytes</b>                                                                                                                                                                                                |               |               |               |               |                |                |
| Day 8                                                                                                                                                                                                                  | —             | —             | 1.21x         | 1.18x         | 1.13x          | 1.15x          |
| Day 29                                                                                                                                                                                                                 | —             | —             | 1.48x         | 1.26x         | 1.60x          | 1.15x          |
| Day 91                                                                                                                                                                                                                 | —             | —             | 1.10x         | 1.25x         | 1.17x          | 1.60x          |
| M = Males F = Females<br>A dash (—) indicates absence of a test article-related change. Numerical values indicate fold (x) change of the treated group mean value relative to the concurrent control group mean value. |               |               |               |               |                |                |

All other fluctuations among individual and mean hematology values, regardless of statistical significance, were not considered test article-related due to one or more of the following: negligible magnitude, inconsistent direction of change, lack of a dose-responsive pattern, and/or relation to expected values for biologic and procedure-related variation.

### 8.3.3. Coagulation

Table 2 and Appendix 2 of the Clinical Pathology Report.

On Day 29 in males at the High Dose there was a minimal increase in mean fibrinogen concentration (1.25x), which had resolved by Day 91. This increase in fibrinogen concentration was considered test article-related and suggestive of a minor immune or inflammatory stimulus as previously discussed.

All other fluctuations among individual and mean coagulation values, regardless of statistical significance, were not considered test article-related due to one or more of the following: negligible magnitude, inconsistent direction of change, lack of a dose-responsive pattern, and/or relation to expected values for biologic and procedure-related variation.

### 8.3.4. Clinical Chemistry

Table 3 and Appendix 3 of the Clinical Pathology Report.

As illustrated in Text Table 5, on Day 29 in males at the Mid and High Dose levels and females at all dose levels there were minimal increases in mean globulin concentrations. These changes had partially to fully resolved by Day 91 at the Low and Mid Dose levels, but persisted at the High Dose. These changes were considered test article-related and suggestive of a minor immune or inflammatory stimulus, as previously discussed.

On Day 8 males at all dose levels had mild decreases in mean triglyceride concentrations, which had partially resolved by Day 29 and fully resolved by Day 91. These decreases in triglyceride concentrations were considered test article-related. No microscopic correlates were observed.

Text Table 5  
scAAV9/JeT-hCLN7opt-SV40pA-Related Clinical Chemistry Changes

| Group<br>Dose Level<br>Sex                                                                                                                                                                                             | 2             |       | 3             |       | 4              |       |
|------------------------------------------------------------------------------------------------------------------------------------------------------------------------------------------------------------------------|---------------|-------|---------------|-------|----------------|-------|
|                                                                                                                                                                                                                        | Low Dose<br>M | F     | Mid Dose<br>M | F     | High Dose<br>M | F     |
| <b>Globulin</b>                                                                                                                                                                                                        |               |       |               |       |                |       |
| Day 8                                                                                                                                                                                                                  | —             | —     | —             | —     | —              | —     |
| Day 29                                                                                                                                                                                                                 | —             | 1.10x | 1.12x         | 1.10x | 1.08x          | 1.09x |
| Day 91                                                                                                                                                                                                                 | —             | 1.05x | 1.07x         | —     | 1.09x          | 1.08x |
| <b>Triglycerides</b>                                                                                                                                                                                                   |               |       |               |       |                |       |
| Day 8                                                                                                                                                                                                                  | 0.53x         | —     | 0.57x         | —     | 0.50x          | —     |
| Day 29                                                                                                                                                                                                                 | 0.77x         | —     | 0.82x         | —     | 0.82x          | —     |
| Day 91                                                                                                                                                                                                                 | —             | —     | —             | —     | —              | —     |
| M = Males F = Females<br>A dash (—) indicates absence of a test article-related change. Numerical values indicate fold (x) change of the treated group mean value relative to the concurrent control group mean value. |               |       |               |       |                |       |

All other fluctuations among individual and mean clinical chemistry values, regardless of statistical significance, were not considered test article-related due to one or more of the following: negligible magnitude, inconsistent direction of change, lack of a dose-responsive pattern, and/or relation to expected values for biologic and procedure-related variation.

#### 8.4. Terminal Evaluations

The Pathology Report is presented in [Appendix 10](#).

##### 8.4.1. Mortality

There were no main study unscheduled deaths during this study.

##### 8.4.2. Gross Pathology

###### 8.4.2.1. Terminal Euthanasia Animals (Day 8)

[Table 1](#) and [Appendix 5](#) of the Pathology Report.

No gross (macroscopic) findings were noted for male or female animals at this interval.

###### 8.4.2.2. Terminal Euthanasia Animals (Day 29)

[Table 2](#) and [Appendix 6](#) of the Pathology Report.

No test article-related gross findings were noted. The gross findings observed were considered incidental, of the nature commonly observed in this strain and age of rat and/or were of similar incidence in control and treated animals and, therefore, were considered unrelated to administration of scAAV9/JeT-hCLN7opt-SV40pA.

###### 8.4.2.3. Terminal Euthanasia Animals (Day 91)

[Table 3](#) and [Appendix 7](#) of the Pathology Report.

No test article-related gross findings were noted. The gross findings observed were considered incidental, of the nature commonly observed in this strain and age of rat and/or were of similar

incidence in control and treated animals and, therefore, were considered unrelated to administration of scAAV9/JeT-hCLN7opt-SV40pA.

### 8.4.3. Organ Weights

#### 8.4.3.1. Terminal Euthanasia Animals (Day 8)

Table 4 and Appendix 2 of the Pathology Report.

No test article-related organ weight changes were noted. There were isolated organ weight values that were different from their respective controls. There were, however, no patterns, trends, or correlating data to suggest these values were toxicologically relevant. Thus, the organ weight differences observed were considered incidental and unrelated to administration of scAAV9/JeT-hCLN7opt-SV40pA.

#### 8.4.3.2. Terminal Euthanasia Animals (Day 29)

Table 5 and Appendix 3 of the Pathology Report.

Potential test article-related organ weight changes noted at the end of Day 29 and are summarized in Text Table 6.

Text Table 6  
Summary of Organ Weight Data – Terminal Euthanasia (Day 29)

| Group                                    | 2                  | Males              |                    |
|------------------------------------------|--------------------|--------------------|--------------------|
|                                          |                    | 3                  | 4                  |
| Dose (vg/day)                            | 5x10 <sup>11</sup> | 2x10 <sup>12</sup> | 6x10 <sup>12</sup> |
| No. Animals per Group                    | 5                  | 5                  | 5                  |
| <b>Thyroid (No. Weighed)<sup>a</sup></b> | 5                  | 5                  | 5                  |
| Absolute value                           | -11.7              | <b>-22.5</b>       | <b>-22.3</b>       |
| % of body weight                         | -12.7              | <b>-20.0</b>       | <b>-23.1</b>       |
| % of brain weight                        | -11.3              | <b>-21.7</b>       | <b>-23.4</b>       |

<sup>a</sup> All values expressed as percent difference of control group means.

Based upon statistical analysis of group means, values highlighted in bold are significantly different from control group – P ≤ 0.01; refer to data tables for actual significance levels and tests used.

Decreased thyroid weights in male animals were statistically significant at ≥ 2x10<sup>12</sup> vg/animal. As per protocol, the thyroid gland was not evaluated microscopically.

No other test article-related organ weight changes were noted. There were other isolated organ weight values that were statistically different from their respective controls. There were, however, no patterns, trends, or correlating data to suggest these values were toxicologically relevant. Thus, other organ weight differences observed were considered incidental and unrelated to administration of scAAV9/JeT-hCLN7opt-SV40pA.

#### 8.4.3.3. Terminal Euthanasia Animals (Day 91)

Table 6 and Appendix 4 of the Pathology Report.

Potential test article-related organ weight changes noted at the Day 91 terminal euthanasia and potential test article-related organ weight changes noted at the Day 29 terminal euthanasia that were not observed at the end of Day 91 are summarized in Text Table 7.

Text Table 7  
Summary of Organ Weight Data – Terminal Euthanasia (Day 91)

| Group<br>Dose (vg/animal)<br>No. Animals per Group | Males              |                    |                    |
|----------------------------------------------------|--------------------|--------------------|--------------------|
|                                                    | 2                  | 3                  | 4                  |
|                                                    | 5x10 <sup>11</sup> | 2x10 <sup>12</sup> | 6x10 <sup>12</sup> |
| <b>Thymus (No. Weighed)<sup>a</sup></b>            | <b>5</b>           | <b>5</b>           | <b>5</b>           |
| Absolute value                                     | 13.0               | 46.9               | <b>64.6</b>        |
| % of body weight                                   | 14.6               | 36.2               | <b>56.0</b>        |
| % of brain weight                                  | 16.2               | 52.7               | <b>70.1</b>        |
| <b>Thyroid (No. Weighed)</b>                       | <b>5</b>           | <b>5</b>           | <b>5</b>           |
| Absolute value                                     | -7.5               | 15.6               | 8.1                |
| % of body weight                                   | -6.9               | 6.8                | 9.4                |
| % of brain weight                                  | -6.0               | 19.2               | 10.4               |

<sup>a</sup> All values expressed as percent difference of control group means.

Based upon statistical analysis of group means, values highlighted in bold are significantly different from control group – P ≤ 0.05; refer to data tables for actual significance levels and tests used.

Increased thymus weights were observed in males in a dose dependent manner and became statistically significant at the highest dose. Increased thymus weights had no histopathological correlate and were considered to be of little toxicological significance.

Potential dose dependent decreases in thyroid weight that were observed in males on Day 29 were not observed on Day 91 and actual increases in thyroid weights were observed at 6x10<sup>12</sup> vg/animal. These data, together with the small magnitude and transiency of the changes observed, support an unlikely relationship to treatment and no toxicological significance.

A statistically significant increase was observed for the spleen of females treated at 6x10<sup>12</sup> vg/animal. Spleen weight increases were of small magnitude, were not in a dose dependent manner and did not have a relevant correlating microscopic effect and were thus considered within expected biological variability for this organ and not related to test article administration.

No other test article-related organ weight changes were noted. There were other isolated organ weight values that were statistically different from their respective controls. There were, however, no patterns, trends, or correlating data to suggest these values were toxicologically relevant. Thus, other organ weight differences observed were considered incidental and unrelated to administration of scAAV9/JeT-hCLN7opt-SV40pA.

#### 8.4.4. Histopathology

##### 8.4.4.1. Terminal Euthanasia (Day 8)

Table 7 and Appendix 5 of the Pathology Report.

Microscopic findings are summarized in Text Table 8.



Text Table 8  
Summary of Microscopic Findings – Terminal Euthanasia (Day 8)

| Group<br>Dose (vg/animal)<br>No. Animals Examined       | Males |                    |                    |                    | Females |                    |                    |                    |
|---------------------------------------------------------|-------|--------------------|--------------------|--------------------|---------|--------------------|--------------------|--------------------|
|                                                         | 1     | 2                  | 3                  | 4                  | 1       | 2                  | 3                  | 4                  |
|                                                         | 0     | 5x10 <sup>11</sup> | 2x10 <sup>12</sup> | 6x10 <sup>12</sup> | 0       | 5x10 <sup>11</sup> | 2x10 <sup>12</sup> | 6x10 <sup>12</sup> |
| <b>Dorsal Root Ganglia, Lumbar right (No. Examined)</b> | 5     | 5                  | 5                  | 5                  | 5       | 5                  | 5                  | 5                  |
| Infiltration, mononuclear perivascular<br>Minimal       | (5)   | (5)                | (5)                | (5)                | (5)     | (5)                | (5)                | (5)                |
|                                                         | 0     | 0                  | 1                  | 1                  | 1       | 1                  | 1                  | 0                  |
| <b>Dorsal Root Ganglia, Lumbar left (No. Examined)</b>  | 5     | 5                  | 5                  | 5                  | 4       | 5                  | 5                  | 5                  |
| Infiltration, mononuclear perivascular<br>Minimal       | (5)   | (5)                | (5)                | (5)                | (4)     | (5)                | (5)                | (5)                |
|                                                         | 1     | 1                  | 0                  | 1                  | 0       | 1                  | 0                  | 1                  |
| <b>Spleen (No. Examined)</b>                            | 5     | 5                  | 5                  | 5                  | 5       | 5                  | 5                  | 5                  |
| Depletion, marginal zone<br>Minimal                     | (5)   | (5)                | (5)                | (5)                | (5)     | (5)                | (5)                | (5)                |
|                                                         | 0     | 0                  | 0                  | 0                  | 0       | 0                  | 0                  | 3                  |
| Mild                                                    | 0     | 0                  | 0                  | 0                  | 0       | 0                  | 0                  | 1                  |
| Marked                                                  | 0     | 0                  | 0                  | 0                  | 0       | 0                  | 0                  | 1                  |
| <b>Spinal Cord, Lumbar (No. Examined)</b>               | 5     | 5                  | 5                  | 5                  | 5       | 5                  | 5                  | 5                  |
| Gliosis<br>Minimal                                      | (5)   | (5)                | (5)                | (5)                | (5)     | (5)                | (5)                | (5)                |
|                                                         | 0     | 0                  | 0                  | 0                  | 0       | 0                  | 2                  | 0                  |
| Infiltration, mononuclear perivascular<br>Minimal       | (5)   | (5)                | (5)                | (5)                | (5)     | (5)                | (5)                | (5)                |
|                                                         | 0     | 0                  | 0                  | 0                  | 0       | 0                  | 2                  | 0                  |
| <b>Spinal Cord, Thoracic (No. Examined)</b>             | 5     | 5                  | 5                  | 5                  | 5       | 5                  | 5                  | 5                  |
| Gliosis<br>Minimal                                      | (5)   | (5)                | (5)                | (5)                | (5)     | (5)                | (5)                | (5)                |
|                                                         | 0     | 0                  | 0                  | 0                  | 0       | 0                  | 1                  | 0                  |
| Infiltration, mononuclear perivascular<br>Minimal       | (5)   | (5)                | (5)                | (5)                | (5)     | (5)                | (5)                | (5)                |
|                                                         | 0     | 0                  | 0                  | 0                  | 0       | 0                  | 1                  | 0                  |

Minimal to marked depletion of the splenic marginal zone was observed in females treated at 6x10<sup>12</sup> vg/animal. Decrease in B lymphocytes (main component) of the marginal zone have been associated with stress related response in rodent preclinical studies.<sup>10</sup> Additionally, this finding was not observed at latter time points and was interpreted likely a transient secondary effect to test article administration and therefore of limited toxicological relevance.

Minimal perivascular mononuclear infiltrates in the right and/or left lumbar ganglia were observed with a comparable incidence across treatment groups, these were attributed to the administration procedure and not directly to test article administration.

Likewise, focal minimal gliosis and minimal perivascular infiltrates were observed in the lumbar and/or the thoracic spinal cord in individual females treated at 2x10<sup>12</sup> vg/animal. These were secondary reactivity to the administration procedure and were not considered to be directly attributable to a test article effect.

Other microscopic findings observed were considered incidental, of the nature commonly observed in this strain and age of rat, and/or were of similar incidence and severity in control and treated animals and, therefore, were considered unrelated to administration of scAAV9/JeT-hCLN7opt-SV40pA.

#### 8.4.4.2. Terminal Euthanasia (Day 29)

Table 8 and Appendix 6 of the Pathology Report.

Microscopic findings noted at the end of Day 29 and are summarized in [Text Table 9](#).

Text Table 9  
Summary of Microscopic Findings – Terminal Euthanasia (Day 29)

| Group<br>Dose (vg/animal)<br>No. Animals Examined           | Males |                    |                    |                    | Females |                    |                    |                    |
|-------------------------------------------------------------|-------|--------------------|--------------------|--------------------|---------|--------------------|--------------------|--------------------|
|                                                             | 1     | 2                  | 3                  | 4                  | 1       | 2                  | 3                  | 4                  |
|                                                             | 0     | 5x10 <sup>11</sup> | 2x10 <sup>12</sup> | 6x10 <sup>12</sup> | 0       | 5x10 <sup>11</sup> | 2x10 <sup>12</sup> | 6x10 <sup>12</sup> |
| <b>Dorsal Root Ganglia, Lumbar right<br/>(No. Examined)</b> | (5)   | (5)                | (5)                | (5)                | (5)     | (5)                | (5)                | (5)                |
| Infiltration, mononuclear perivascular                      |       |                    |                    |                    |         |                    |                    |                    |
| Minimal                                                     | 0     | 1                  | 1                  | 2                  | 1       | 1                  | 0                  | 1                  |
| Mild                                                        | 0     | 1                  | 0                  | 0                  | 0       | 0                  | 0                  | 0                  |
| <b>Dorsal Root Ganglia, Lumbar left (No.<br/>Examined)</b>  | (5)   | (5)                | (5)                | (5)                | (5)     | (5)                | (5)                | (5)                |
| Infiltration, mononuclear perivascular                      |       |                    |                    |                    |         |                    |                    |                    |
| Minimal                                                     | 0     | 1                  | 1                  | 1                  | 0       | 1                  | 2                  | 2                  |

Minimal perivascular mononuclear infiltrates in the right and/or left lumbar ganglia were observed with an overall comparable incidence across treatment groups and were attributed to the administration procedure and not directly to test article administration. In the groups administered the test article, there was a potential very slight trend, that had no clear dose response, for increased finding incidence and severity that could possibly be attributable to reactivity to the presence of the test article.

Other microscopic findings observed were considered incidental, of the nature commonly observed in this strain and age of rat, and/or were of similar incidence and severity in control and treated animals and, therefore, were considered unrelated to administration of scAAV9/JeT-hCLN7opt-SV40pA.

#### 8.4.4.3. Terminal Euthanasia (Day 91)

[Table 9](#) and [Appendix 7](#) of the Pathology Report.

Microscopic findings noted at the end of Day 91 and are summarized in [Text Table 10](#).

Text Table 10  
Summary of Microscopic Findings – Terminal Euthanasia (Day 91)

| Group<br>Dose (vg/animal)<br>No. Animals Examined           | Males |                    |                    |                    | Females |                    |                    |                    |
|-------------------------------------------------------------|-------|--------------------|--------------------|--------------------|---------|--------------------|--------------------|--------------------|
|                                                             | 1     | 2                  | 3                  | 4                  | 1       | 2                  | 3                  | 4                  |
|                                                             | 0     | 5x10 <sup>11</sup> | 2x10 <sup>12</sup> | 6x10 <sup>12</sup> | 0       | 5x10 <sup>11</sup> | 2x10 <sup>12</sup> | 6x10 <sup>12</sup> |
| <b>Dorsal Root Ganglia, Lumbar right<br/>(No. Examined)</b> | (5)   | (5)                | (5)                | (5)                | (5)     | (5)                | (5)                | (5)                |
| Infiltration, mononuclear perivascular                      |       |                    |                    |                    |         |                    |                    |                    |
| Minimal                                                     | 0     | 0                  | 0                  | 0                  | 0       | 0                  | 3                  | 0                  |
| <b>Dorsal Root Ganglia, Lumbar left<br/>(No. Examined)</b>  | (5)   | (5)                | (5)                | (5)                | (5)     | (5)                | (5)                | (5)                |
| Infiltration, mononuclear perivascular                      |       |                    |                    |                    |         |                    |                    |                    |
| Minimal                                                     | 0     | 1                  | 0                  | 0                  | 1       | 0                  | 2                  | 0                  |

Minimal perivascular mononuclear infiltrates in the right and/or left lumbar ganglia were observed with an overall comparable incidence across treatment groups, that decreased in severity and incidence by Day 91. These were attributed to the administration procedure and not directly to test article administration.

Other microscopic findings observed were considered incidental, of the nature commonly observed in this strain and age of rat, and/or were of similar incidence and severity in control and treated animals and, therefore, were considered unrelated to administration of scAAV9/JeT-hCLN7opt-SV40pA.

### 8.5. Biodistribution Evaluations

The Biodistribution Report is presented in [Appendix 11](#).

IT delivery of AAV9/CLN7 vector results in dose dependent increase of CLN7 vector DNA across the central nervous system (brain and spinal cord) and peripheral organs (heart, lung, liver, kidney, ovary, and testes). The CLN7 vector DNA is concentrated closest to the injection site in the spinal cord and detected at lower levels in multiple brain regions. In the peripheral organs, similar high amounts of CLN7 DNA persist in liver and heart and to the less extent in testes, ovary, lung, and kidney. The pattern of CLN7 biodistribution in this study is consistent with that expected from AAV9 and observed in a previous study from Dr. Gray's laboratory where a similar vector, scAAV9/JeT-hGANopt-spA, was injected IT to WT rats at a dose of  $6.6 \times 10^{11}$  vg per rat (Gray lab, unpublished findings). Collectively, IT delivery of AAV9/CLN7 results in broad CLN7 biodistribution across rat body.

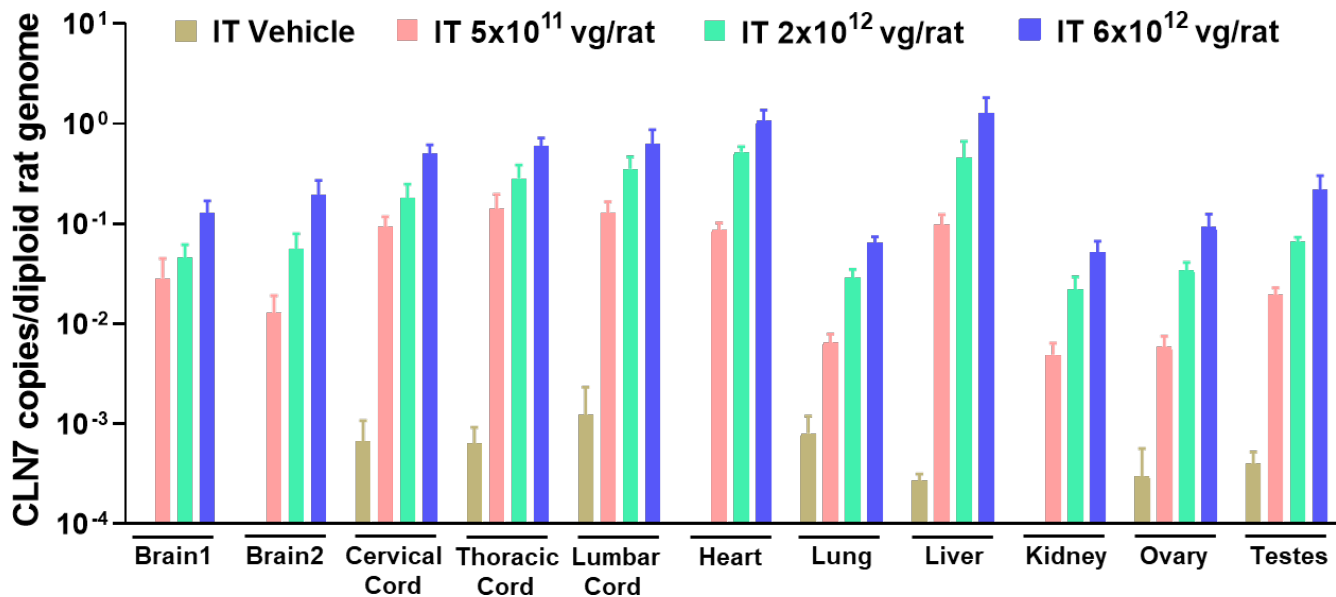

Figure 1. AAV9/CLN7 biodistribution in normal rats.

## 9. CONCLUSION

The objective of this study, to further characterize the toxicity and biodistribution of the test article, scAAV9/JeT-hCLN7opt-SV40pA, following a single intrathecal (IT) injection in CD<sup>®</sup>[CrI:CD<sup>®</sup>(SD)] rats, was met. Administration of the scAAV9/JeT-hCLN7opt-SV40pA was not associated with any mortality, clinical observations, accelerating rotarod values, bodyweight or food consumption changes. All animals survived to their scheduled terminal necropsies.

Single intrathecal injections of scAAV9/JeT-hCLN7opt-SV40pA to Sprague Dawley rats at Low Dose ( $5 \times 10^{11}$  vg/animal), Mid Dose ( $2 \times 10^{12}$  vg/animal) or High Dose ( $6 \times 10^{12}$  vg/animal) levels on Day 1 with an observation period through Day 91 resulted in test article-related increases in lymphocyte counts in both sexes at the Mid and High dose levels with concomitant increases in total leukocyte counts, which tended to partially resolve by the end of the observation period except in females at the High Dose levels. Additionally, males administered the High Dose level had a test article-related increase in fibrinogen concentration that had resolved by the end of the observation period. Males administered Mid and High Dose levels and females administered Low, Mid, and High Dose levels also had test article-related increases in globulin concentrations, which had partially resolved by the end of the observation period at the Low and Mid Dose levels but persisted in both sexes at the High Dose level. These changes were collectively suggestive of a minor immune or inflammatory stimulus, which lacked definitive microscopic correlates.

Males administered the Low, Mid, and High Dose levels also had test article-related decreases in triglyceride concentrations that had resolved by the end of the observation period and lacked microscopic correlates.

Intrathecal administration of scAAV9/JeT-hCLN7opt-SV40pA once on Day 1 to rats at doses of 0,  $5 \times 10^{11}$ ,  $2 \times 10^{12}$  or  $6 \times 10^{12}$  vg/animal with an observation period of up to 91 days resulted in no unscheduled deaths. There were no test article-related macroscopic findings. There were no microscopic changes directly attributable to the administration of scAAV9/JeT-hCLN7opt-SV40pA.

Therefore, within the duration and design of this study the no-observed-adverse-effect-level (NOAEL) was  $6 \times 10^{12}$  vg/animal of scAAV9/JeT-hCLN7opt-SV40pA.

**10. REFERENCES**

1. Guidance on non-clinical safety studies for the conduct of human clinical trials and marketing authorization for pharmaceuticals. ICH M3(R2), 2009 June 11 (ICH Implementation Date).
2. Guide for the Care and Use of Laboratory Animals. 8<sup>th</sup> ed., Washington, D.C., National Academies Press, 2011.
3. Principles for the utilization and care of vertebrate animals used in testing, research, and training. Federal Register, 1985 May 20; 50(97).
4. Position statement on the use of animals in research. NIH Guide, 1993 Feb 26; 22(8).
5. Guidance for industry, investigators, and reviewers: exploratory IND studies. U.S. F.D.A. Center for Drug Evaluation and Research (CDER), 2006 Jan.
6. Latendresse JR, Warbritton AR, Jonassen H, Creasy DM. Fixation of testes and eyes using a modified Davidson's fluid: comparison with Bouin's fluid and conventional Davidson's fluid. Toxicol Pathol. 2002 Jul Aug;30(4):524-33.
7. Milliken GA, Johnson DE. Analysis of messy data. London: Chapman and Hall: 1992.
8. Royston, JP. Approximating the Shapiro-Wilk W Test for Nonnormality. Statistics and Computing 1992; 2:117-119.
9. Zar JH. Biostatistical analysis, 4th ed. New Jersey: Prentice Hall; 1999.
10. Everds NE, Snyder PW, Bailey KL, Bolon B, Creasy DM, Foley GL, Rosol TJ, Sellers T., Interpreting stress responses during routine toxicity studies: a review of the biology, impact, and assessment., Toxicol Pathol. 2013;41(4):560-614.

Figure 1  
Mean Body Weight Values

2759-001  
A Single Dose Toxicity Study of Test Article Administered by Intrathecal Injection in Rats  
Mean Body Weight Values

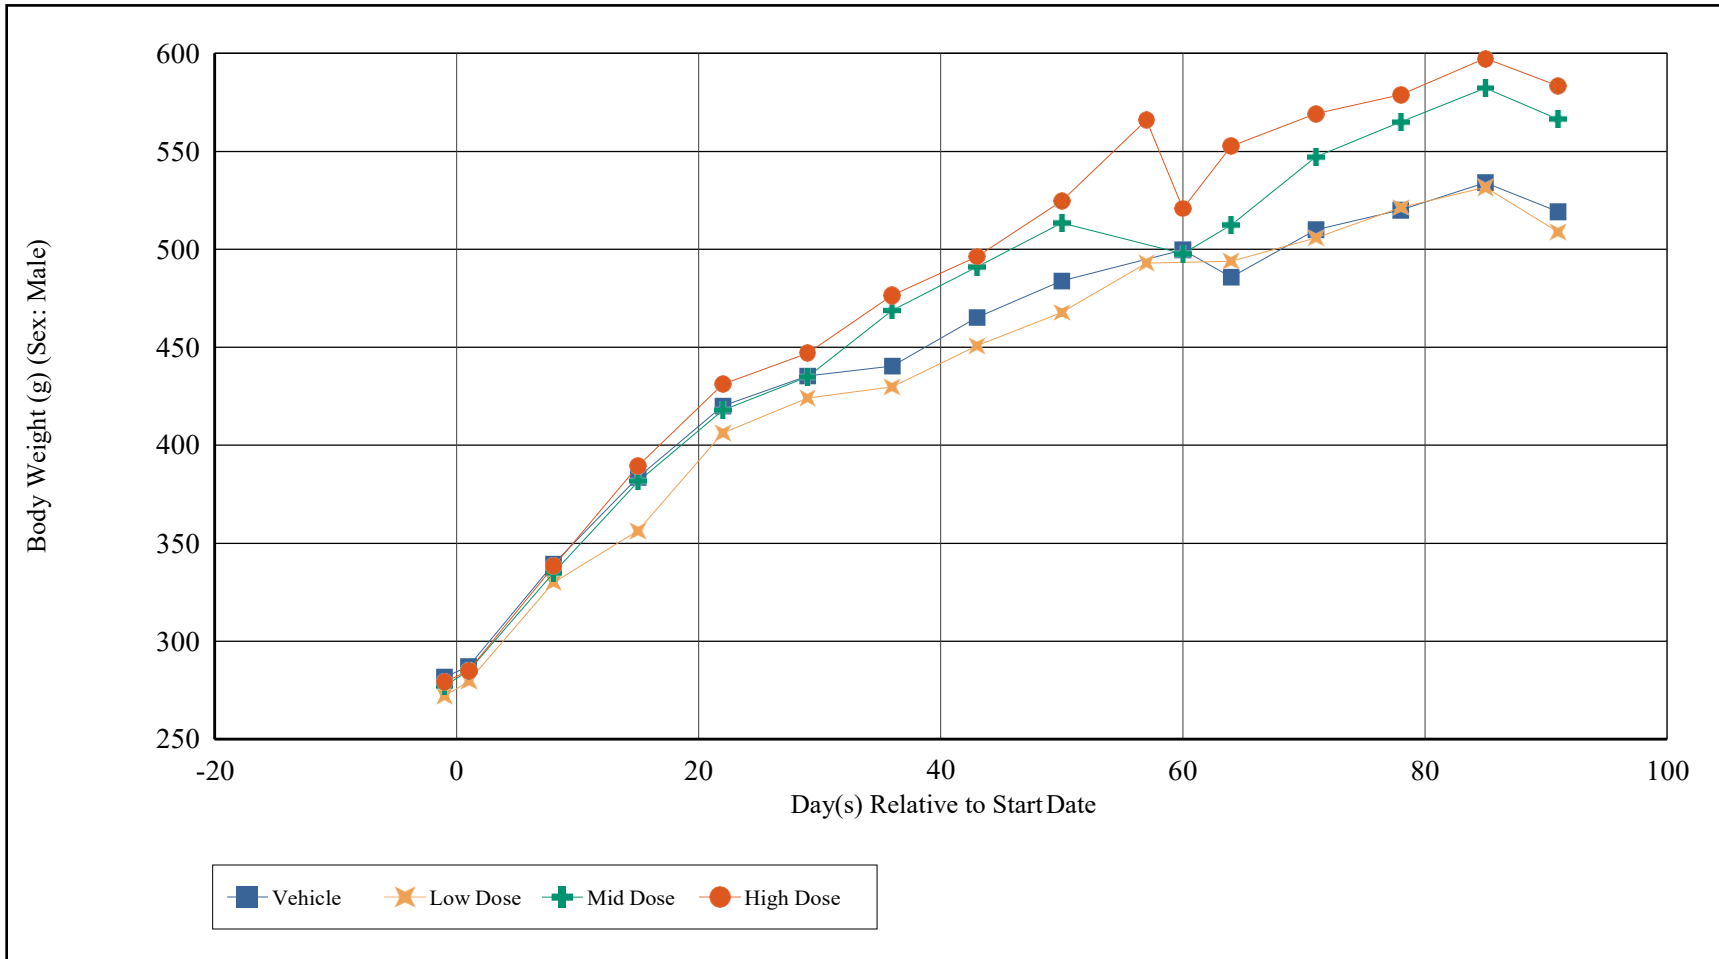

Day 8 body weights for several Day 8 Necropsy animals were fasted, necropsy body weights. See [Appendix 6](#) for individual body weights.

2759-001  
A Single Dose Toxicity Study of Test Article Administered by Intrathecal Injection in Rats  
Mean Body Weight Values

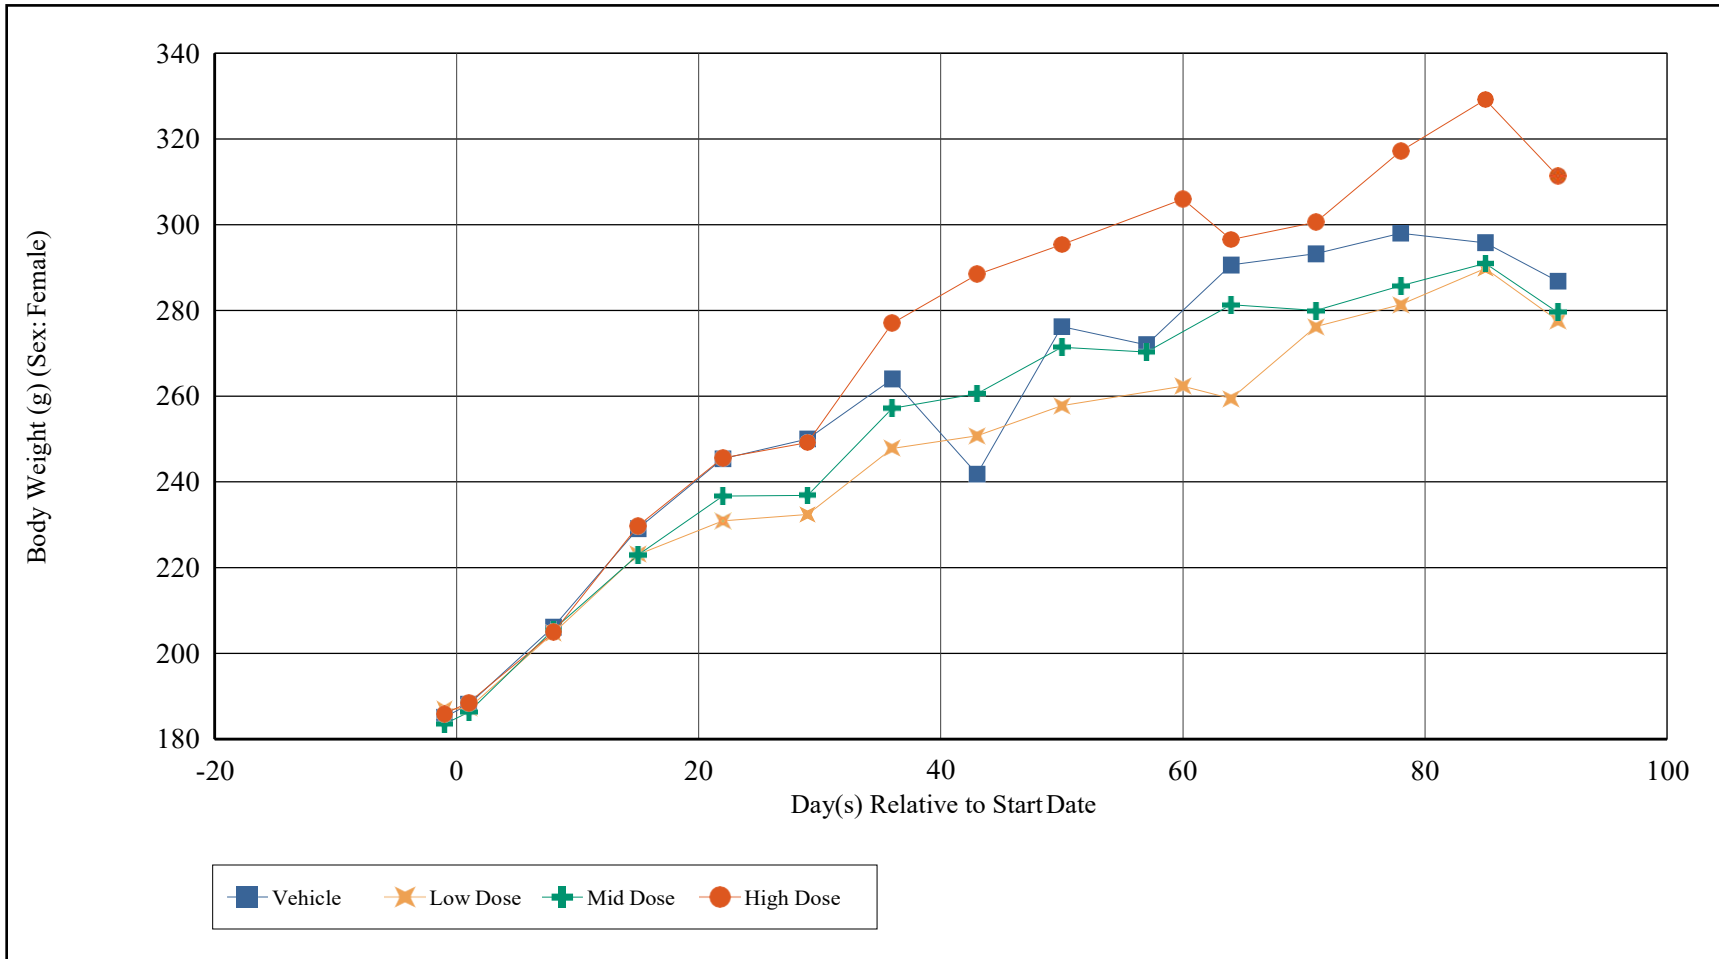

Day 8 body weights for several Day 8 Necropsy animals were fasted, necropsy body weights. See [Appendix 6](#) for individual body weights.



Figure 2  
Mean Body Weight Change Values

2759-001  
A Single Dose Toxicity Study of Test Article Administered by Intrathecal Injection in Rats  
Mean Body Weight Change Values, g

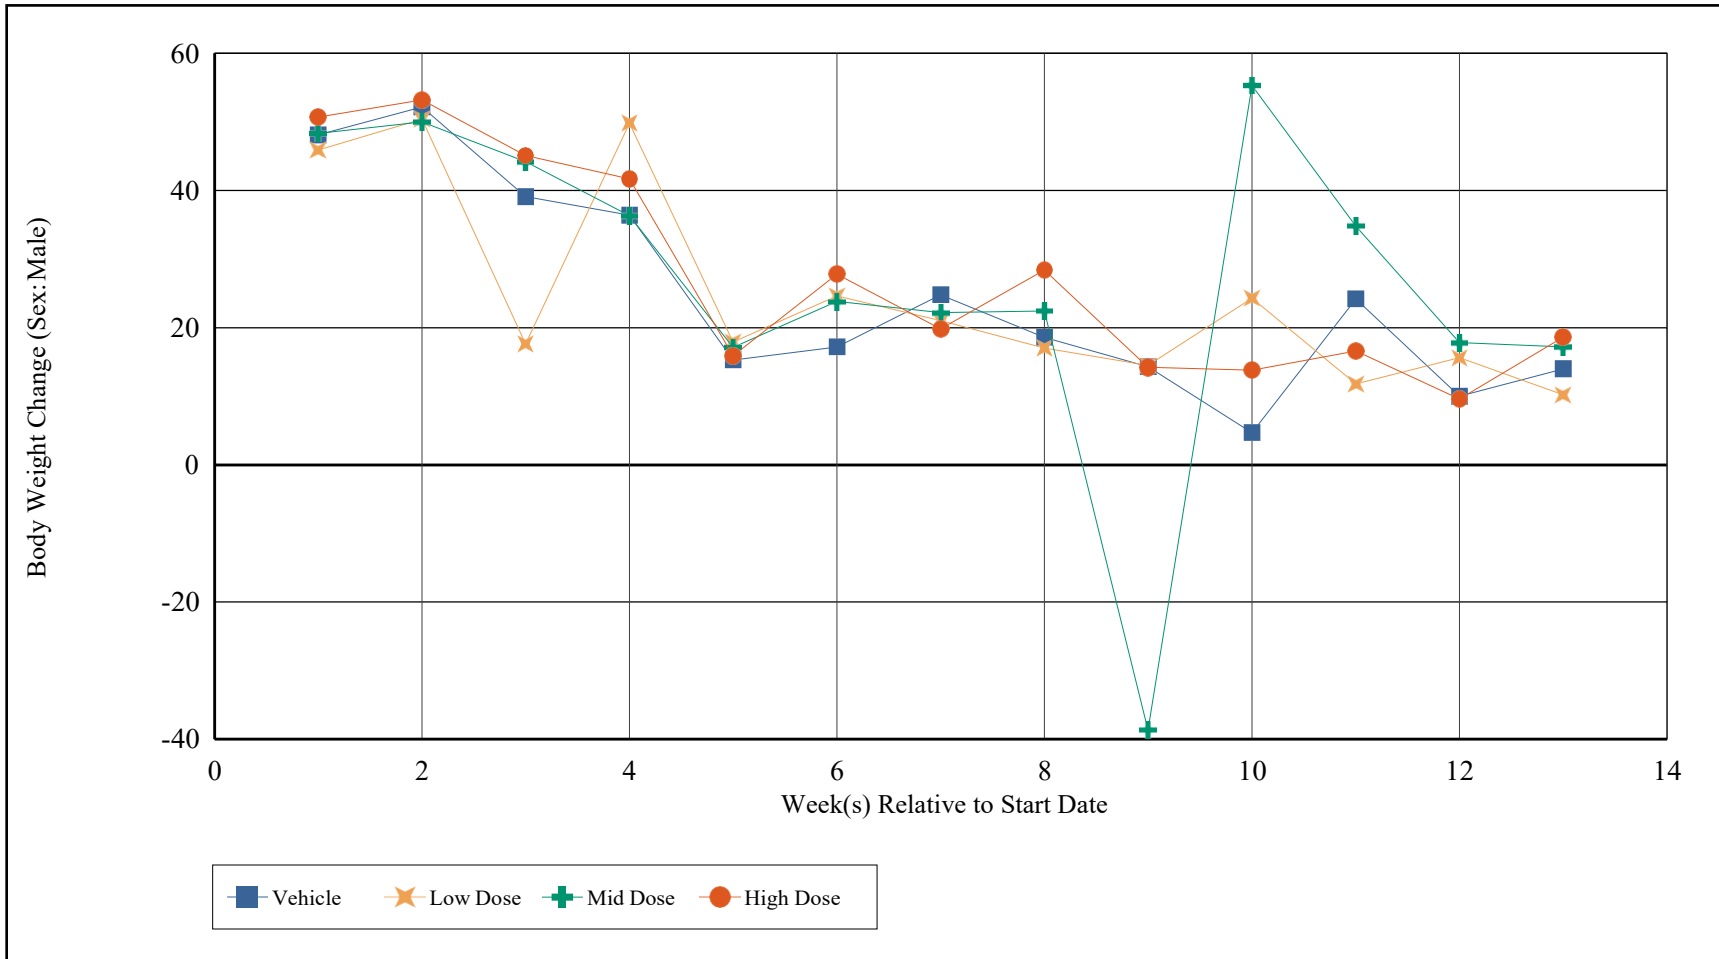

Day 8 body weights for several Day 8 Necropsy animals were fasted, necropsy body weights. See [Appendix 6](#) for individual body weights.

2759-001  
A Single Dose Toxicity Study of Test Article Administered by Intrathecal Injection in Rats  
Mean Body Weight Change Values, g

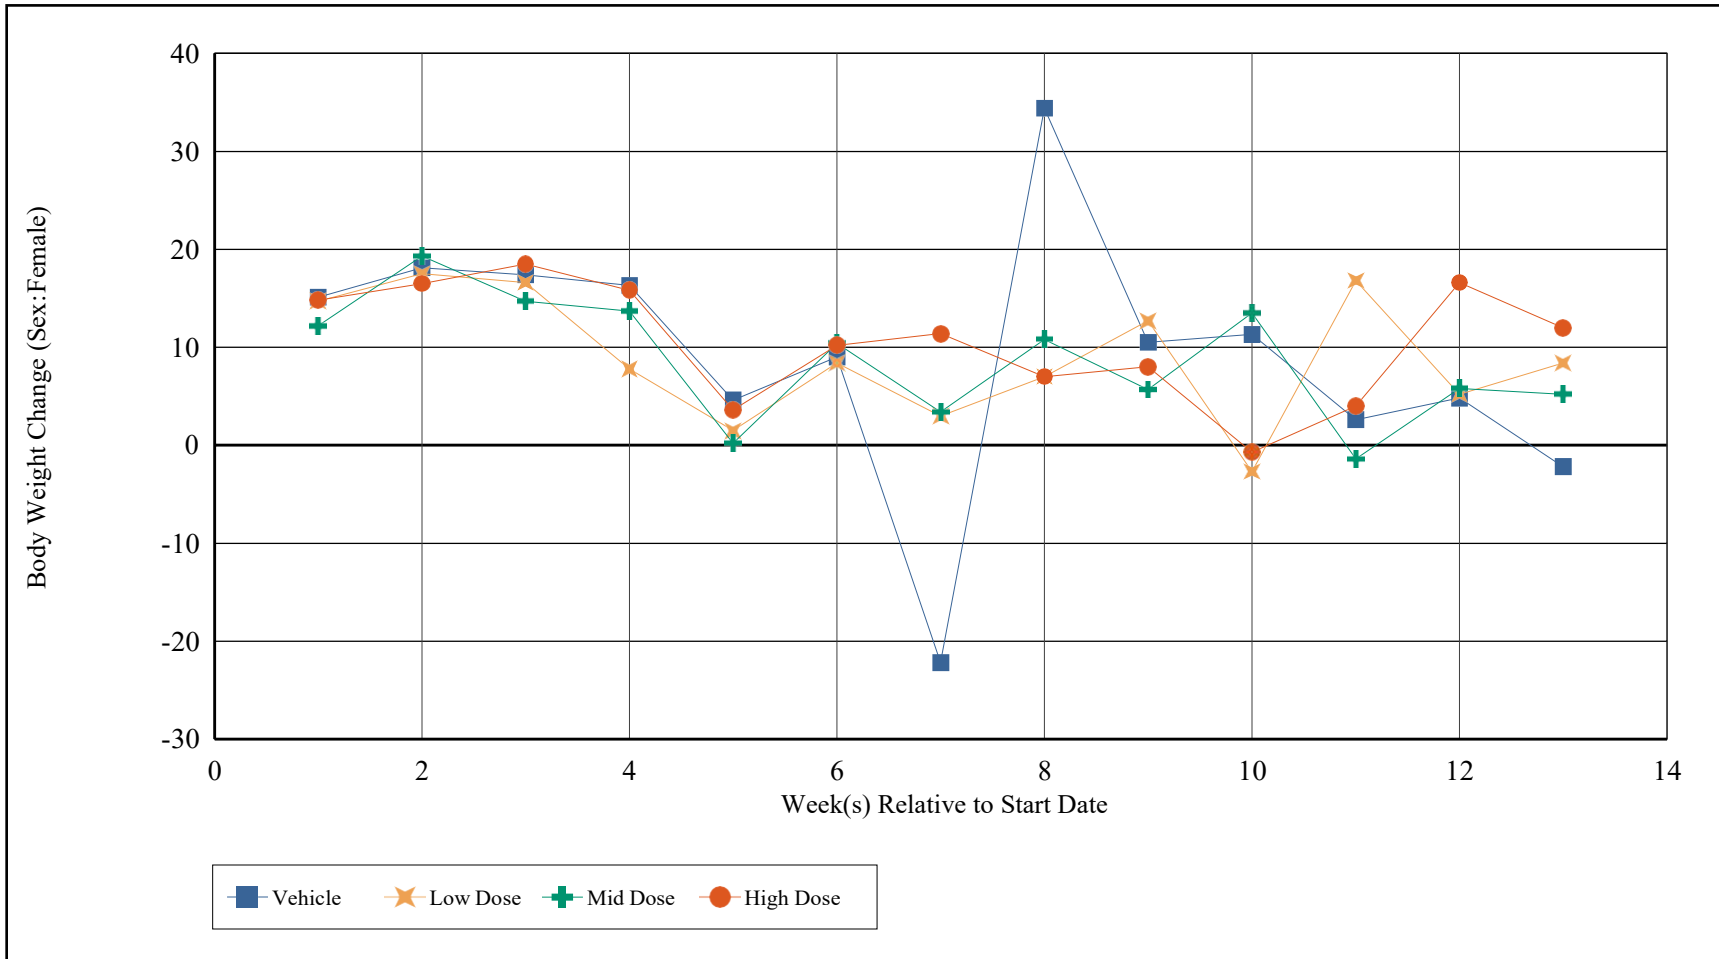

Day 8 body weights for several Day 8 Necropsy animals were fasted, necropsy body weights. See [Appendix 6](#) for individual body weights.

Figure 3  
Mean Caged Food Consumption Values

2759-001  
A Single Dose Toxicity Study of Test Article Administered by Intrathecal Injection in Rats

Mean Caged Food Consumption Values

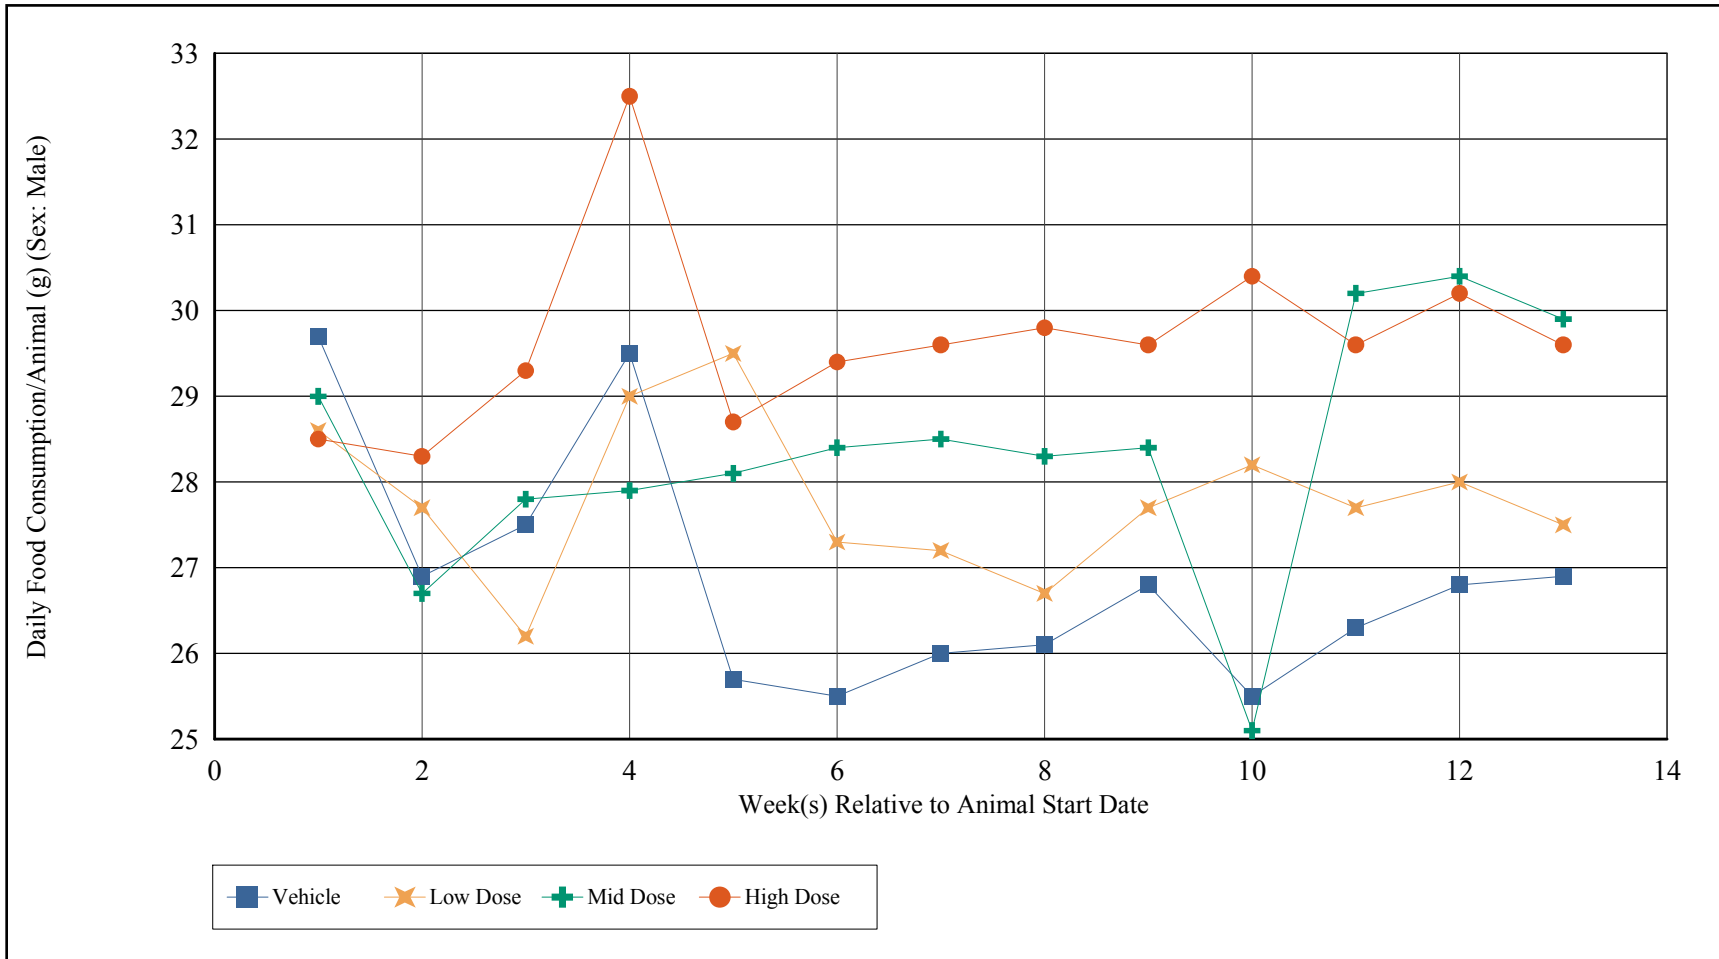

2759-001  
A Single Dose Toxicity Study of Test Article Administered by Intrathecal Injection in Rats

Mean Caged Food Consumption Values

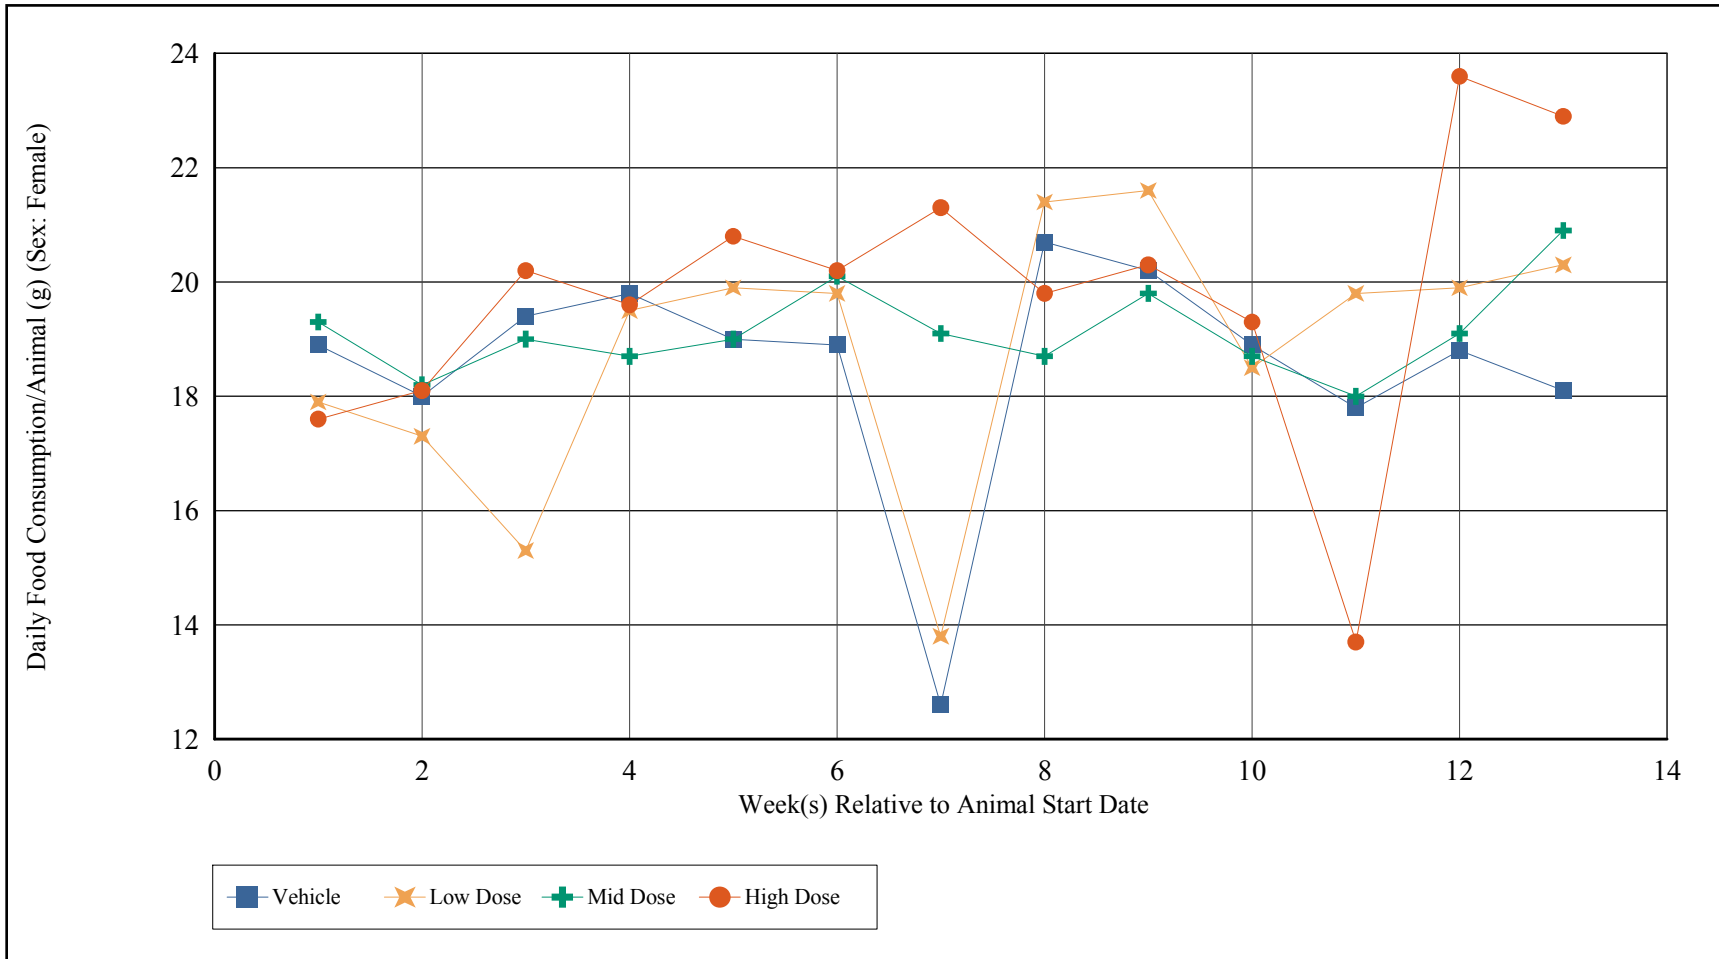

Table 1  
Summary of Detailed Clinical Observations

2759-001  
A Single Dose Toxicity Study of Test Article Administered by Intrathecal Injection in Rats

## Summary of Detailed Clinical Observations

| Observation Type: Routine<br>From Week -1 (Start Date) to 13 (Start Date) | Male    |          |          |           |
|---------------------------------------------------------------------------|---------|----------|----------|-----------|
|                                                                           | Vehicle | Low Dose | Mid Dose | High Dose |
| Total Number of Animals:                                                  | 15      | 15       | 15       | 15        |
| <b>Normal</b>                                                             |         |          |          |           |
| Number of Times Recorded                                                  | 80      | 92       | 101      | 99        |
| Number of Animals Affected                                                | 14      | 15       | 15       | 15        |
| <b>-BEHAVIOR/ACTIVITY</b>                                                 |         |          |          |           |
| <b>Stereotypy</b>                                                         |         |          |          |           |
| Number of Times Recorded                                                  | 0       | 0        | 0        | 0         |
| <b>Vocalization</b>                                                       |         |          |          |           |
| Number of Times Recorded                                                  | 0       | 0        | 0        | 0         |
| <b>-EXTERNAL APPEARANCE</b>                                               |         |          |          |           |
| <b>Ear/portion of ear missing</b>                                         |         |          |          |           |
| Number of Times Recorded                                                  | 0       | 4        | 6        | 8         |
| Number of Animals Affected                                                | -       | 2        | 2        | 1         |
| <b>Tail bent</b>                                                          |         |          |          |           |
| Number of Times Recorded                                                  | 25      | 0        | 0        | 0         |
| Number of Animals Affected                                                | 2       | -        | -        | -         |
| <b>-PELAGE/SKIN</b>                                                       |         |          |          |           |
| <b>Hair discolored, Red</b>                                               |         |          |          |           |
| Number of Times Recorded                                                  | 3       | 0        | 5        | 4         |
| Number of Animals Affected                                                | 1       | -        | 1        | 1         |
| <b>Hair discolored, Brown</b>                                             |         |          |          |           |
| Number of Times Recorded                                                  | 6       | 0        | 0        | 4         |
| Number of Animals Affected                                                | 1       | -        | -        | 1         |
| <b>Hair sparse</b>                                                        |         |          |          |           |
| Number of Times Recorded                                                  | 17      | 17       | 10       | 16        |
| Number of Animals Affected                                                | 3       | 4        | 1        | 3         |
| <b>Loss of skin elasticity</b>                                            |         |          |          |           |
| Number of Times Recorded                                                  | 0       | 1        | 1        | 0         |
| Number of Animals Affected                                                | -       | 1        | 1        | -         |
| <b>Nodule, 5-20 mm</b>                                                    |         |          |          |           |
| Number of Times Recorded                                                  | 0       | 0        | 0        | 0         |
| <b>Scabbed area</b>                                                       |         |          |          |           |
| Number of Times Recorded                                                  | 9       | 17       | 10       | 8         |
| Number of Animals Affected                                                | 3       | 3        | 1        | 3         |



2759-001

A Single Dose Toxicity Study of Test Article Administered by Intrathecal Injection in Rats

## Summary of Detailed Clinical Observations

| Observation Type: Unscheduled<br>From Week -1 (Start Date) to 13 (Start Date) | Male    |          |          |           |
|-------------------------------------------------------------------------------|---------|----------|----------|-----------|
|                                                                               | Vehicle | Low Dose | Mid Dose | High Dose |
| Total Number of Animals:                                                      | 15      | 15       | 15       | 15        |
| <b>-EXTERNAL APPEARANCE</b>                                                   |         |          |          |           |
| <b>Discharge, Red</b>                                                         |         |          |          |           |
| Number of Times Recorded                                                      | 0       | -        | 0        | -         |
| <b>Ear/portion of ear missing</b>                                             |         |          |          |           |
| Number of Times Recorded                                                      | 0       | -        | 1        | -         |
| Number of Animals Affected                                                    | -       | -        | 1        | -         |
| <b>Swelling</b>                                                               |         |          |          |           |
| Number of Times Recorded                                                      | 0       | -        | 0        | -         |
| <b>Tail bent</b>                                                              |         |          |          |           |
| Number of Times Recorded                                                      | 1       | -        | 0        | -         |
| Number of Animals Affected                                                    | 1       | -        | -        | -         |
| <b>-PELAGE/SKIN</b>                                                           |         |          |          |           |
| <b>Hair sparse</b>                                                            |         |          |          |           |
| Number of Times Recorded                                                      | 2       | -        | 1        | -         |
| Number of Animals Affected                                                    | 2       | -        | 1        | -         |
| <b>Scabbed area</b>                                                           |         |          |          |           |
| Number of Times Recorded                                                      | 2       | -        | 1        | -         |
| Number of Animals Affected                                                    | 2       | -        | 1        | -         |

2759-001  
A Single Dose Toxicity Study of Test Article Administered by Intrathecal Injection in Rats

## Summary of Detailed Clinical Observations

| Observation Type: Routine<br>From Week -1 (Start Date) to 13 (Start Date) | Female  |          |          |           |
|---------------------------------------------------------------------------|---------|----------|----------|-----------|
|                                                                           | Vehicle | Low Dose | Mid Dose | High Dose |
| Total Number of Animals:                                                  | 15      | 15       | 15       | 15        |
| <b>Normal</b>                                                             |         |          |          |           |
| Number of Times Recorded                                                  | 109     | 101      | 104      | 108       |
| Number of Animals Affected                                                | 15      | 15       | 15       | 15        |
| <b>-BEHAVIOR/ACTIVITY</b>                                                 |         |          |          |           |
| <b>Stereotypy</b>                                                         |         |          |          |           |
| Number of Times Recorded                                                  | 0       | 0        | 0        | 6         |
| Number of Animals Affected                                                | -       | -        | -        | 1         |
| <b>Vocalization</b>                                                       |         |          |          |           |
| Number of Times Recorded                                                  | 0       | 0        | 1        | 1         |
| Number of Animals Affected                                                | -       | -        | 1        | 1         |
| <b>-EXTERNAL APPEARANCE</b>                                               |         |          |          |           |
| <b>Ear/portion of ear missing</b>                                         |         |          |          |           |
| Number of Times Recorded                                                  | 0       | 0        | 0        | 0         |
| <b>Tail bent</b>                                                          |         |          |          |           |
| Number of Times Recorded                                                  | 0       | 0        | 0        | 0         |
| <b>-PELAGE/SKIN</b>                                                       |         |          |          |           |
| <b>Hair discolored, Red</b>                                               |         |          |          |           |
| Number of Times Recorded                                                  | 14      | 17       | 10       | 7         |
| Number of Animals Affected                                                | 1       | 4        | 4        | 3         |
| <b>Hair discolored, Brown</b>                                             |         |          |          |           |
| Number of Times Recorded                                                  | 0       | 5        | 0        | 0         |
| Number of Animals Affected                                                | -       | 1        | -        | -         |
| <b>Hair sparse</b>                                                        |         |          |          |           |
| Number of Times Recorded                                                  | 2       | 0        | 7        | 0         |
| Number of Animals Affected                                                | 1       | -        | 2        | -         |
| <b>Loss of skin elasticity</b>                                            |         |          |          |           |
| Number of Times Recorded                                                  | 2       | 0        | 0        | 0         |
| Number of Animals Affected                                                | 2       | -        | -        | -         |
| <b>Nodule, 5-20 mm</b>                                                    |         |          |          |           |
| Number of Times Recorded                                                  | 0       | 0        | 5        | 0         |
| Number of Animals Affected                                                | -       | -        | 1        | -         |
| <b>Scabbed area</b>                                                       |         |          |          |           |
| Number of Times Recorded                                                  | 0       | 0        | 3        | 1         |
| Number of Animals Affected                                                | -       | -        | 3        | 1         |

2759-001

A Single Dose Toxicity Study of Test Article Administered by Intrathecal Injection in Rats

## Summary of Detailed Clinical Observations

| Observation Type: Unscheduled<br>From Week -1 (Start Date) to 13 (Start Date) | Female  |          |          |           |
|-------------------------------------------------------------------------------|---------|----------|----------|-----------|
|                                                                               | Vehicle | Low Dose | Mid Dose | High Dose |
| Total Number of Animals:                                                      | 15      | 15       | 15       | 15        |
| <b>-EXTERNAL APPEARANCE</b>                                                   |         |          |          |           |
| <b>Discharge, Red</b>                                                         |         |          |          |           |
| Number of Times Recorded                                                      | -       | -        | 1        | -         |
| Number of Animals Affected                                                    | -       | -        | 1        | -         |
| <b>Ear/portion of ear missing</b>                                             |         |          |          |           |
| Number of Times Recorded                                                      | -       | -        | 0        | -         |
| <b>Swelling</b>                                                               |         |          |          |           |
| Number of Times Recorded                                                      | -       | -        | 2        | -         |
| Number of Animals Affected                                                    | -       | -        | 2        | -         |
| <b>Tail bent</b>                                                              |         |          |          |           |
| Number of Times Recorded                                                      | -       | -        | 0        | -         |
| <b>-PELAGE/SKIN</b>                                                           |         |          |          |           |
| <b>Hair sparse</b>                                                            |         |          |          |           |
| Number of Times Recorded                                                      | -       | -        | 0        | -         |
| <b>Scabbed area</b>                                                           |         |          |          |           |
| Number of Times Recorded                                                      | -       | -        | 0        | -         |

Table 2  
Summary of Body Weight Values

2759-001  
 A Single Dose Toxicity Study of Test Article Administered by Intrathecal Injection in Rats

Summary of Body Weight Values

Body Weight (g)

| Sex: Male                     |      | Vehicle | Low Dose | Mid Dose | High Dose |
|-------------------------------|------|---------|----------|----------|-----------|
| Day(s) Relative to Start Date |      |         |          |          |           |
| -1                            | Mean | 281.6   | 271.9    | 277.1    | 279.0     |
|                               | SD   | 21.12   | 25.13    | 24.90    | 24.57     |
|                               | N    | 15      | 15       | 15       | 15        |
| 1                             | Mean | 287.1   | 279.5    | 284.8    | 284.9     |
|                               | SD   | 21.33   | 25.64    | 24.35    | 22.82     |
|                               | N    | 15      | 15       | 15       | 15        |
| 8                             | Mean | 339.3   | 329.9    | 334.8    | 338.1     |
|                               | SD   | 24.16   | 28.76    | 26.69    | 30.02     |
|                               | N    | 15      | 15       | 15       | 15        |
| 15                            | Mean | 383.6   | 356.4    | 381.5    | 389.4     |
|                               | SD   | 25.18   | 59.20    | 37.07    | 45.82     |
|                               | N    | 10      | 10       | 10       | 10        |
| 22                            | Mean | 420.0   | 406.2    | 417.8    | 431.1     |
|                               | SD   | 28.96   | 38.61    | 42.03    | 55.36     |
|                               | N    | 10      | 10       | 10       | 10        |

Day 8 body weights for several Day 8 Necropsy animals were fasted, necropsy body weights. See [Appendix 6](#) for individual body weights.

2759-001  
 A Single Dose Toxicity Study of Test Article Administered by Intrathecal Injection in Rats

Summary of Body Weight Values

Body Weight (g)

| Sex: Male                     |      | Vehicle | Low Dose | Mid Dose | High Dose |
|-------------------------------|------|---------|----------|----------|-----------|
| Day(s) Relative to Start Date |      |         |          |          |           |
| 29 [g]                        | Mean | 435.3   | 424.1    | 434.9    | 447.0     |
|                               | SD   | 19.55   | 28.93    | 44.25    | 62.46     |
|                               | N    | 10      | 10       | 10       | 10        |
| 36 [g]                        | Mean | 440.4   | 429.8    | 468.8    | 476.4     |
|                               | SD   | 22.83   | 33.03    | 35.86    | 53.70     |
|                               | N    | 5       | 5        | 5        | 5         |
| 43 [g]                        | Mean | 465.2   | 450.8    | 491.0    | 496.2     |
|                               | SD   | 17.38   | 36.18    | 33.50    | 54.37     |
|                               | N    | 5       | 5        | 5        | 5         |
| 50 [g]                        | Mean | 483.8   | 467.8    | 513.4    | 524.6     |
|                               | SD   | 20.24   | 41.92    | 38.51    | 61.13     |
|                               | N    | 5       | 5        | 5        | 5         |
| 57 [I]                        | Mean | -       | 493.0 n  | -        | 566.0 n   |
|                               | SD   | -       | 67.88    | -        | 48.08     |
|                               | N    | -       | 2        | -        | 2         |

---

[g] - Anova & Dunnett

[I] - n - Inappropriate for statistics

2759-001  
 A Single Dose Toxicity Study of Test Article Administered by Intrathecal Injection in Rats

Summary of Body Weight Values

Body Weight (g)

| Sex: Male                     |      | Vehicle | Low Dose | Mid Dose | High Dose |
|-------------------------------|------|---------|----------|----------|-----------|
| Day(s) Relative to Start Date |      |         |          |          |           |
| 60                            | Mean | 499.7   | -        | 497.7    | 520.7     |
|                               | SD   | 8.08    | -        | 30.09    | 77.22     |
|                               | N    | 3       | -        | 3        | 3         |
| 64                            | Mean | 485.8   | 494.0    | 512.4    | 552.6     |
|                               | SD   | 30.68   | 53.09    | 61.55    | 69.58     |
|                               | N    | 5       | 5        | 5        | 5         |
| 71                            | Mean | 510.0   | 505.8    | 547.2    | 569.2     |
|                               | SD   | 19.04   | 57.14    | 45.04    | 75.00     |
|                               | N    | 5       | 5        | 5        | 5         |
| 78                            | Mean | 520.0   | 521.4    | 565.0    | 578.8     |
|                               | SD   | 17.28   | 60.04    | 45.95    | 79.54     |
|                               | N    | 5       | 5        | 5        | 5         |
| 85                            | Mean | 534.0   | 531.6    | 582.2    | 597.4     |
|                               | SD   | 21.41   | 56.16    | 45.47    | 79.09     |
|                               | N    | 5       | 5        | 5        | 5         |

2759-001  
 A Single Dose Toxicity Study of Test Article Administered by Intrathecal Injection in Rats

Summary of Body Weight Values

Body Weight (g)

| Sex: Male                     |      | Vehicle | Low Dose | Mid Dose | High Dose |
|-------------------------------|------|---------|----------|----------|-----------|
| Day(s) Relative to Start Date |      |         |          |          |           |
| 91                            | Mean | 519.2   | 509.0    | 566.4    | 583.4     |
|                               | SD   | 20.58   | 61.38    | 49.44    | 77.72     |
|                               | N    | 5       | 5        | 5        | 5         |



2759-001  
A Single Dose Toxicity Study of Test Article Administered by Intrathecal Injection in Rats

## Summary of Body Weight Values

## Body Weight (g)

| Sex: Female                   |      | Vehicle | Low Dose | Mid Dose | High Dose |
|-------------------------------|------|---------|----------|----------|-----------|
| Day(s) Relative to Start Date |      |         |          |          |           |
| -1                            | Mean | 185.1   | 186.9    | 183.5    | 185.9     |
|                               | SD   | 9.74    | 11.33    | 9.58     | 9.15      |
|                               | N    | 15      | 15       | 15       | 15        |
| 1                             | Mean | 188.1   | 187.2    | 186.3    | 188.5     |
|                               | SD   | 11.25   | 11.18    | 10.50    | 8.08      |
|                               | N    | 15      | 15       | 15       | 15        |
| 8                             | Mean | 206.1   | 204.7    | 205.5    | 204.9     |
|                               | SD   | 14.53   | 12.44    | 11.22    | 16.20     |
|                               | N    | 15      | 15       | 15       | 15        |
| 15                            | Mean | 229.1   | 223.1    | 223.0    | 229.8     |
|                               | SD   | 7.65    | 16.02    | 14.89    | 14.66     |
|                               | N    | 10      | 10       | 10       | 10        |
| 22                            | Mean | 245.4   | 230.9    | 236.7    | 245.6     |
|                               | SD   | 11.86   | 17.62    | 16.96    | 20.41     |
|                               | N    | 10      | 10       | 10       | 10        |

Day 8 body weights for several Day 8 Necropsy animals were fasted, necropsy body weights. See [Appendix 6](#) for individual body weights.

2759-001  
 A Single Dose Toxicity Study of Test Article Administered by Intrathecal Injection in Rats

Summary of Body Weight Values

Body Weight (g)

| Sex: Female                   |      | Vehicle | Low Dose | Mid Dose | High Dose |
|-------------------------------|------|---------|----------|----------|-----------|
| Day(s) Relative to Start Date |      |         |          |          |           |
| 29 [g]                        | Mean | 250.0   | 232.4    | 236.9    | 249.2     |
|                               | SD   | 16.22   | 16.93    | 21.66    | 25.60     |
|                               | N    | 10      | 10       | 10       | 10        |
| 36 [g]                        | Mean | 264.0   | 247.8    | 257.2    | 277.0     |
|                               | SD   | 21.40   | 14.38    | 12.11    | 14.16     |
|                               | N    | 5       | 5        | 5        | 5         |
| 43 [g1]                       | Mean | 241.8   | 250.8    | 260.6    | 288.4     |
|                               | SD   | 48.26   | 14.53    | 10.26    | 13.96     |
|                               | N    | 5       | 5        | 5        | 5         |
| 50 [g]                        | Mean | 276.2   | 257.8    | 271.4    | 295.4     |
|                               | SD   | 21.32   | 19.36    | 12.34    | 16.04     |
|                               | N    | 5       | 5        | 5        | 5         |
| 57 [I]                        | Mean | 272.0 n | -        | 270.3 n  | -         |
|                               | SD   | 43.84   | -        | 3.79     | -         |
|                               | N    | 2       | -        | 3        | -         |

---

[g] - Anova & Dunnett  
 [g1] - Kruskal-Wallis & Dunn  
 [I] - n - Inappropriate for statistics

2759-001  
 A Single Dose Toxicity Study of Test Article Administered by Intrathecal Injection in Rats

Summary of Body Weight Values

Body Weight (g)

| Sex: Female                   |      | Vehicle | Low Dose | Mid Dose | High Dose |
|-------------------------------|------|---------|----------|----------|-----------|
| Day(s) Relative to Start Date |      |         |          |          |           |
| 60 [I]                        | Mean | -       | 262.3 n  | -        | 306.0 n   |
|                               | SD   | -       | 20.98    | -        | 14.73     |
|                               | N    | -       | 3        | -        | 3         |
| 64 [g]                        | Mean | 290.6   | 259.4    | 281.4    | 296.6     |
|                               | SD   | 25.34   | 15.03    | 16.95    | 19.86     |
|                               | N    | 5       | 5        | 5        | 5         |
| 71 [g]                        | Mean | 293.2   | 276.2    | 280.0    | 300.6     |
|                               | SD   | 30.10   | 20.02    | 15.57    | 15.81     |
|                               | N    | 5       | 5        | 5        | 5         |
| 78 [g]                        | Mean | 298.0   | 281.4    | 285.8    | 317.2     |
|                               | SD   | 29.33   | 23.16    | 16.72    | 20.91     |
|                               | N    | 5       | 5        | 5        | 5         |
| 85 [g]                        | Mean | 295.8   | 289.8    | 291.0    | 329.2     |
|                               | SD   | 32.44   | 27.63    | 19.89    | 21.90     |
|                               | N    | 5       | 5        | 5        | 5         |

[g] - Anova & Dunnett

[I] - n - Inappropriate for statistics

2759-001  
 A Single Dose Toxicity Study of Test Article Administered by Intrathecal Injection in Rats

Summary of Body Weight Values

Body Weight (g)

| Sex: Female                   |      | Vehicle | Low Dose | Mid Dose | High Dose |
|-------------------------------|------|---------|----------|----------|-----------|
| Day(s) Relative to Start Date |      |         |          |          |           |
| 91                            | Mean | 286.8   | 277.6    | 279.6    | 311.4     |
|                               | SD   | 23.55   | 19.93    | 17.91    | 22.07     |
|                               | N    | 5       | 5        | 5        | 5         |

Table 3  
Summary of Body Weight Change Values

2759-001  
 A Single Dose Toxicity Study of Test Article Administered by Intrathecal Injection in Rats

Summary of Body Weight Change Values, g

Body Weight Change

| Sex: Male                     |      | Vehicle | Low Dose | Mid Dose | High Dose |
|-------------------------------|------|---------|----------|----------|-----------|
| Day(s) Relative to Start Date |      |         |          |          |           |
| -1 → 1 [g]                    | Mean | 5.5     | 7.6      | 7.7      | 5.9       |
|                               | SD   | 4.70    | 3.48     | 4.95     | 5.47      |
|                               | N    | 15      | 15       | 15       | 15        |
| 1 → 8 [g]                     | Mean | 52.2    | 50.4     | 50.0     | 53.2      |
|                               | SD   | 10.07   | 11.09    | 9.97     | 13.29     |
|                               | N    | 15      | 15       | 15       | 15        |
| 8 → 15 [g1]                   | Mean | 39.1    | 17.6     | 44.2     | 45.1      |
|                               | SD   | 5.70    | 50.20    | 10.66    | 13.14     |
|                               | N    | 10      | 10       | 10       | 10        |
| 15 → 22 [g1]                  | Mean | 36.4    | 49.8     | 36.3     | 41.7      |
|                               | SD   | 6.22    | 33.90    | 8.65     | 11.89     |
|                               | N    | 10      | 10       | 10       | 10        |
| 22 → 29 [g]                   | Mean | 15.3    | 17.9     | 17.1     | 15.9      |
|                               | SD   | 14.24   | 16.75    | 18.02    | 15.93     |
|                               | N    | 10      | 10       | 10       | 10        |

Day 8 body weights for several Day 8 Necropsy animals were fasted, necropsy body weights. See [Appendix 6](#) for individual body weights.

---

[g] - Anova & Dunnett  
 [g1] - Kruskal-Wallis & Dunn

2759-001  
A Single Dose Toxicity Study of Test Article Administered by Intrathecal Injection in Rats

## Summary of Body Weight Change Values, g

## Body Weight Change

| Sex: Male                     |      | Vehicle | Low Dose | Mid Dose | High Dose |
|-------------------------------|------|---------|----------|----------|-----------|
| Day(s) Relative to Start Date |      |         |          |          |           |
| 29 → 36 [g]                   | Mean | 17.2    | 24.6     | 23.8     | 27.8      |
|                               | SD   | 6.72    | 9.13     | 5.45     | 6.91      |
|                               | N    | 5       | 5        | 5        | 5         |
| 36 → 43 [g]                   | Mean | 24.8    | 21.0     | 22.2     | 19.8      |
|                               | SD   | 7.09    | 7.91     | 4.32     | 2.68      |
|                               | N    | 5       | 5        | 5        | 5         |
| 43 → 50 [g]                   | Mean | 18.6    | 17.0     | 22.4     | 28.4      |
|                               | SD   | 6.07    | 8.37     | 7.23     | 13.07     |
|                               | N    | 5       | 5        | 5        | 5         |
| 50 → 57 [I]                   | Mean | -       | 14.5 n   | -        | 19.5 n    |
|                               | SD   | -       | 4.95     | -        | 3.54      |
|                               | N    | -       | 2        | -        | 2         |
| 50 → 60 [g]                   | Mean | 14.3    | -        | -38.7 b  | 10.7      |
|                               | SD   | 6.35    | -        | 4.16     | 11.85     |
|                               | N    | 3       | -        | 3        | 3         |

[g] - Anova &amp; Dunnett: b = p &lt; 0.01

[I] - n - Inappropriate for statistics

2759-001  
A Single Dose Toxicity Study of Test Article Administered by Intrathecal Injection in Rats

## Summary of Body Weight Change Values, g

## Body Weight Change

| Sex: Male                     |      | Vehicle | Low Dose | Mid Dose | High Dose |
|-------------------------------|------|---------|----------|----------|-----------|
| Day(s) Relative to Start Date |      |         |          |          |           |
| 60 → 64 [g]                   | Mean | 4.7     | -        | 55.3 b   | 8.0       |
|                               | SD   | 3.06    | -        | 1.15     | 1.73      |
|                               | N    | 3       | -        | 3        | 3         |
| 57 → 64 [l]                   | Mean | -       | 14.5 n   | -        | 22.5 n    |
|                               | SD   | -       | 2.12     | -        | 4.95      |
|                               | N    | -       | 2        | -        | 2         |
| 50 → 64 [l]                   | Mean | -23.5 n | 24.3 n   | -27.5 n  | -         |
|                               | SD   | 6.36    | 22.94    | 6.36     | -         |
|                               | N    | 2       | 3        | 2        | -         |
| 64 → 71 [g1]                  | Mean | 24.2    | 11.8     | 34.8     | 16.6      |
|                               | SD   | 20.90   | 7.46     | 18.59    | 5.59      |
|                               | N    | 5       | 5        | 5        | 5         |
| 71 → 78 [g]                   | Mean | 10.0    | 15.6     | 17.8     | 9.6       |
|                               | SD   | 5.52    | 5.98     | 7.40     | 7.27      |
|                               | N    | 5       | 5        | 5        | 5         |

[g] - Anova &amp; Dunnett: b = p &lt; 0.01

[l] - n - Inappropriate for statistics

[g1] - Anova &amp; Dunnett(Log)



2759-001  
A Single Dose Toxicity Study of Test Article Administered by Intrathecal Injection in Rats

## Summary of Body Weight Change Values, g

## Body Weight Change

| Sex: Male                     |      | Vehicle | Low Dose | Mid Dose | High Dose |
|-------------------------------|------|---------|----------|----------|-----------|
| Day(s) Relative to Start Date |      |         |          |          |           |
| 78 → 85                       | Mean | 14.0    | 10.2     | 17.2     | 18.6      |
|                               | SD   | 5.79    | 13.79    | 3.11     | 5.86      |
|                               | N    | 5       | 5        | 5        | 5         |
| 85 → 91                       | Mean | -14.8   | -22.6    | -15.8    | -14.0     |
|                               | SD   | 3.96    | 8.02     | 6.38     | 6.67      |
|                               | N    | 5       | 5        | 5        | 5         |

2759-001  
A Single Dose Toxicity Study of Test Article Administered by Intrathecal Injection in Rats

## Summary of Body Weight Change Values, g

## Body Weight Change

| Sex: Female                   |      | Vehicle | Low Dose | Mid Dose | High Dose |
|-------------------------------|------|---------|----------|----------|-----------|
| Day(s) Relative to Start Date |      |         |          |          |           |
| -1 → 1 [g]                    | Mean | 3.0     | 0.3      | 2.8      | 2.5       |
|                               | SD   | 5.58    | 2.09     | 5.39     | 3.46      |
|                               | N    | 15      | 15       | 15       | 15        |
| 1 → 8 [g1]                    | Mean | 18.1    | 17.5     | 19.3     | 16.5      |
|                               | SD   | 12.53   | 8.54     | 9.25     | 13.55     |
|                               | N    | 15      | 15       | 15       | 15        |
| 8 → 15 [g1]                   | Mean | 17.4    | 16.6     | 14.7     | 18.5      |
|                               | SD   | 6.11    | 4.12     | 7.15     | 5.50      |
|                               | N    | 10      | 10       | 10       | 10        |
| 15 → 22 [g1]                  | Mean | 16.3    | 7.8      | 13.7     | 15.8      |
|                               | SD   | 7.42    | 6.66     | 6.36     | 10.00     |
|                               | N    | 10      | 10       | 10       | 10        |
| 22 → 29 [g1]                  | Mean | 4.6     | 1.5      | 0.2      | 3.6       |
|                               | SD   | 12.39   | 13.39    | 9.64     | 14.89     |
|                               | N    | 10      | 10       | 10       | 10        |

Day 8 body weights for several Day 8 Necropsy animals were fasted, necropsy body weights. See [Appendix 6](#) for individual body weights.

---

[g] - Kruskal-Wallis & Dunn

[g1] - Anova & Dunnett

2759-001  
 A Single Dose Toxicity Study of Test Article Administered by Intrathecal Injection in Rats

Summary of Body Weight Change Values, g

Body Weight Change

| Sex: Female                   |      | Vehicle | Low Dose | Mid Dose | High Dose |
|-------------------------------|------|---------|----------|----------|-----------|
| Day(s) Relative to Start Date |      |         |          |          |           |
| 29 → 36 [g]                   | Mean | 9.0     | 8.4      | 10.4     | 10.2      |
|                               | SD   | 6.04    | 8.62     | 11.84    | 9.28      |
|                               | N    | 5       | 5        | 5        | 5         |
| 36 → 43 [g1]                  | Mean | -22.2   | 3.0      | 3.4      | 11.4      |
|                               | SD   | 40.48   | 7.31     | 8.17     | 11.33     |
|                               | N    | 5       | 5        | 5        | 5         |
| 43 → 50 [g1]                  | Mean | 34.4    | 7.0      | 10.8     | 7.0       |
|                               | SD   | 33.92   | 9.97     | 8.14     | 12.77     |
|                               | N    | 5       | 5        | 5        | 5         |
| 50 → 57 [I]                   | Mean | 10.5 n  | -        | 5.7 n    | -         |
|                               | SD   | 12.02   | -        | 7.64     | -         |
|                               | N    | 2       | -        | 3        | -         |
| 50 → 60 [I]                   | Mean | -       | 12.7 n   | -        | 8.0 n     |
|                               | SD   | -       | 14.43    | -        | 5.57      |
|                               | N    | -       | 3        | -        | 3         |

---

[g] - Anova & Dunnett  
 [g1] - Kruskal-Wallis & Dunn  
 [I] - n - Inappropriate for statistics

2759-001  
A Single Dose Toxicity Study of Test Article Administered by Intrathecal Injection in Rats

## Summary of Body Weight Change Values, g

## Body Weight Change

| Sex: Female                   |      | Vehicle | Low Dose | Mid Dose | High Dose |
|-------------------------------|------|---------|----------|----------|-----------|
| Day(s) Relative to Start Date |      |         |          |          |           |
| 60 → 64 [I]                   | Mean | -       | -2.7 n   | -        | -0.7 n    |
|                               | SD   | -       | 7.57     | -        | 3.21      |
|                               | N    | -       | 3        | -        | 3         |
| 57 → 64 [I]                   | Mean | 8.5 n   | -        | 2.0 n    | -         |
|                               | SD   | 2.12    | -        | 8.00     | -         |
|                               | N    | 2       | -        | 3        | -         |
| 50 → 64 [I]                   | Mean | 11.3 n  | -11.0 n  | 13.5 n   | -8.0 n    |
|                               | SD   | 1.15    | 4.24     | 4.95     | 4.24      |
|                               | N    | 3       | 2        | 2        | 2         |
| 64 → 71 [g]                   | Mean | 2.6     | 16.8     | -1.4     | 4.0       |
|                               | SD   | 11.10   | 15.11    | 6.58     | 5.39      |
|                               | N    | 5       | 5        | 5        | 5         |
| 71 → 78 [g]                   | Mean | 4.8     | 5.2      | 5.8      | 16.6 a    |
|                               | SD   | 4.44    | 4.71     | 2.17     | 11.87     |
|                               | N    | 5       | 5        | 5        | 5         |

[I] - n - Inappropriate for statistics

[g] - Anova &amp; Dunnett: a = p &lt; 0.05

2759-001  
 A Single Dose Toxicity Study of Test Article Administered by Intrathecal Injection in Rats

Summary of Body Weight Change Values, g

Body Weight Change

| Sex: Female                   |      | Vehicle | Low Dose | Mid Dose | High Dose |
|-------------------------------|------|---------|----------|----------|-----------|
| Day(s) Relative to Start Date |      |         |          |          |           |
| 78 → 85 [g]                   | Mean | -2.2    | 8.4      | 5.2      | 12.0      |
|                               | SD   | 5.17    | 9.13     | 4.60     | 11.98     |
|                               | N    | 5       | 5        | 5        | 5         |
| 85 → 91 [g1]                  | Mean | -9.0    | -12.2    | -11.4    | -17.8     |
|                               | SD   | 11.85   | 8.87     | 3.58     | 4.44      |
|                               | N    | 5       | 5        | 5        | 5         |

---

[g] - Anova & Dunnett  
 [g1] - Kruskal-Wallis & Dunn

Table 4  
Summary of Caged Food Consumption Values

2759-001  
A Single Dose Toxicity Study of Test Article Administered by Intrathecal Injection in Rats

## Summary of Caged Food Consumption Values

Daily Food Consumption/Animal (g)

| Sex: Male                             |      | Vehicle | Low Dose | Mid Dose | High Dose |
|---------------------------------------|------|---------|----------|----------|-----------|
| Week(s) Relative to Animal Start Date |      |         |          |          |           |
| 1 [I]                                 | Mean | 29.7 n  | 28.6 n   | 29.0 n   | 28.5 n    |
|                                       | SD   | 0.02    | 0.73     | 0.04     | 1.36      |
|                                       | N    | 2       | 2        | 2        | 2         |
| 1 → 2 [g]                             | Mean | 26.9    | 27.7     | 26.7     | 28.3      |
|                                       | SD   | 1.98    | 3.33     | 0.59     | 3.37      |
|                                       | N    | 4       | 4        | 4        | 4         |
| 2 → 3 [g]                             | Mean | 27.5    | 26.2     | 27.8     | 29.3      |
|                                       | SD   | 1.74    | 8.27     | 0.80     | 4.62      |
|                                       | N    | 4       | 4        | 4        | 4         |
| 4 [I]                                 | Mean | 29.5 n  | 29.0 n   | 27.9 n   | 32.5 n    |
|                                       | SD   | 1.47    | 0.98     | 1.20     | 7.37      |
|                                       | N    | 2       | 2        | 2        | 2         |
| 3 → 4 [g]                             | Mean | 27.0    | 28.6     | 27.6     | 30.5      |
|                                       | SD   | 3.03    | 4.09     | 0.75     | 4.97      |
|                                       | N    | 4       | 4        | 4        | 4         |
| 4 → 5 [I]                             | Mean | 25.7 n  | 29.5 n   | 28.1 n   | 28.7 n    |
|                                       | SD   | 0.81    | 1.80     | 1.30     | 2.00      |
|                                       | N    | 2       | 2        | 2        | 2         |

[I] - n - Inappropriate for statistics

[g] - Anova &amp; Dunnett

2759-001  
A Single Dose Toxicity Study of Test Article Administered by Intrathecal Injection in Rats

## Summary of Caged Food Consumption Values

Daily Food Consumption/Animal (g)

| Sex: Male                             |      | Vehicle | Low Dose | Mid Dose | High Dose |
|---------------------------------------|------|---------|----------|----------|-----------|
| Week(s) Relative to Animal Start Date |      |         |          |          |           |
| 5 → 6                                 | Mean | 25.5 n  | 27.3 n   | 28.4 n   | 29.4 n    |
|                                       | SD   | 1.75    | 4.26     | 0.51     | 3.27      |
|                                       | N    | 2       | 2        | 2        | 2         |
| 6 → 7                                 | Mean | 26.0 n  | 27.2 n   | 28.5 n   | 29.6 n    |
|                                       | SD   | 1.57    | 3.32     | 0.91     | 3.92      |
|                                       | N    | 2       | 2        | 2        | 2         |
| 7 → 8                                 | Mean | 26.1 n  | 26.7 n   | 28.3 n   | 29.8 n    |
|                                       | SD   | 2.22    | 3.10     | 1.40     | 3.27      |
|                                       | N    | 2       | 2        | 2        | 2         |
| 8 → 9                                 | Mean | 26.8 n  | 27.7 n   | 28.4 n   | 29.6 n    |
|                                       | SD   | 1.14    | 2.74     | 1.13     | 4.18      |
|                                       | N    | 2       | 2        | 2        | 2         |
| 9 → 10                                | Mean | 25.5 n  | 28.2 n   | 25.1 n   | 30.4 n    |
|                                       | SD   | 4.19    | 3.60     | 0.25     | 2.26      |
|                                       | N    | 2       | 2        | 2        | 2         |
| 10 → 11                               | Mean | 26.3 n  | 27.7 n   | 30.2 n   | 29.6 n    |
|                                       | SD   | 0.89    | 2.71     | 1.25     | 3.96      |
|                                       | N    | 2       | 2        | 2        | 2         |

n - Inappropriate for statistics



2759-001  
A Single Dose Toxicity Study of Test Article Administered by Intrathecal Injection in Rats

Summary of Caged Food Consumption Values

Daily Food Consumption/Animal (g)

| Sex: Male                             |      | Vehicle | Low Dose | Mid Dose | High Dose |
|---------------------------------------|------|---------|----------|----------|-----------|
| Week(s) Relative to Animal Start Date |      |         |          |          |           |
| 11 → 12                               | Mean | 26.8 n  | 28.0 n   | 30.4 n   | 30.2 n    |
|                                       | SD   | 1.26    | 2.49     | 0.10     | 4.53      |
|                                       | N    | 2       | 2        | 2        | 2         |
| 13                                    | Mean | 26.7 n  | 27.5 n   | 29.9 n   | 29.6 n    |
|                                       | SD   | 2.45    | 0.19     | 1.72     | 3.51      |
|                                       | N    | 2       | 2        | 2        | 2         |
| 12 → 13                               | Mean | 26.9 n  | 25.3 n   | 29.8 n   | 28.9 n    |
|                                       | SD   | 2.00    | 0.45     | 1.48     | 3.20      |
|                                       | N    | 2       | 2        | 2        | 2         |

---

n - Inappropriate for statistics

2759-001  
A Single Dose Toxicity Study of Test Article Administered by Intrathecal Injection in Rats

## Summary of Caged Food Consumption Values

Daily Food Consumption/Animal (g)

| Sex: Female                           |      | Vehicle | Low Dose | Mid Dose | High Dose |
|---------------------------------------|------|---------|----------|----------|-----------|
| Week(s) Relative to Animal Start Date |      |         |          |          |           |
| 1 [I]                                 | Mean | 18.9 n  | 17.9 n   | 19.3 n   | 17.6 n    |
|                                       | SD   | 0.35    | 1.85     | 1.20     | 1.67      |
|                                       | N    | 2       | 2        | 2        | 2         |
| 1 → 2 [g]                             | Mean | 18.0    | 17.3     | 18.2     | 18.1      |
|                                       | SD   | 1.14    | 1.07     | 0.83     | 0.76      |
|                                       | N    | 4       | 4        | 4        | 4         |
| 2 → 3 [g1]                            | Mean | 19.4    | 15.3     | 19.0     | 20.2      |
|                                       | SD   | 0.67    | 6.39     | 1.23     | 0.95      |
|                                       | N    | 4       | 4        | 4        | 4         |
| 4 [I]                                 | Mean | 19.8 n  | 17.2 n   | 17.8 n   | 17.5 n    |
|                                       | SD   | 0.88    | 1.55     | 0.75     | 1.89      |
|                                       | N    | 2       | 2        | 2        | 2         |
| 3 → 4 [g]                             | Mean | 19.5    | 19.5     | 18.7     | 19.6      |
|                                       | SD   | 1.38    | 3.46     | 0.74     | 0.65      |
|                                       | N    | 4       | 4        | 4        | 4         |
| 4 → 5 [I]                             | Mean | 19.0 n  | 19.9 n   | 19.0 n   | 20.8 n    |
|                                       | SD   | 0.76    | 1.43     | 1.01     | 0.19      |
|                                       | N    | 2       | 2        | 2        | 2         |

[I] - n - Inappropriate for statistics

[g] - Anova &amp; Dunnett

[g1] - Kruskal-Wallis &amp; Dunn

2759-001  
A Single Dose Toxicity Study of Test Article Administered by Intrathecal Injection in Rats

## Summary of Caged Food Consumption Values

Daily Food Consumption/Animal (g)

| Sex: Female                           |      | Vehicle | Low Dose | Mid Dose | High Dose |
|---------------------------------------|------|---------|----------|----------|-----------|
| Week(s) Relative to Animal Start Date |      |         |          |          |           |
| 5 → 6                                 | Mean | 18.9 n  | 19.8 n   | 20.1 n   | 20.2 n    |
|                                       | SD   | 0.12    | 1.35     | 0.59     | 0.13      |
|                                       | N    | 2       | 2        | 2        | 2         |
| 6 → 7                                 | Mean | 12.6 n  | 13.8 n   | 19.1 n   | 21.3 n    |
|                                       | SD   | 8.40    | 6.97     | 0.51     | 2.17      |
|                                       | N    | 2       | 2        | 2        | 2         |
| 7 → 8                                 | Mean | 20.7 n  | 21.4 n   | 18.7 n   | 19.8 n    |
|                                       | SD   | 3.20    | 3.32     | 1.01     | 0.30      |
|                                       | N    | 2       | 2        | 2        | 2         |
| 8 → 9                                 | Mean | 20.2 n  | 21.6 n   | 19.8 n   | 20.3 n    |
|                                       | SD   | 1.78    | 0.56     | 0.07     | 0.62      |
|                                       | N    | 2       | 2        | 2        | 2         |
| 9 → 10                                | Mean | 18.9 n  | 18.5 n   | 18.7 n   | 19.3 n    |
|                                       | SD   | 0.42    | 0.79     | 0.32     | 0.25      |
|                                       | N    | 2       | 2        | 2        | 2         |
| 10 → 11                               | Mean | 17.8 n  | 19.8 n   | 18.0 n   | 13.7 n    |
|                                       | SD   | 0.86    | 1.08     | 0.57     | 8.37      |
|                                       | N    | 2       | 2        | 2        | 2         |

n - Inappropriate for statistics

2759-001  
 A Single Dose Toxicity Study of Test Article Administered by Intrathecal Injection in Rats

Summary of Caged Food Consumption Values

Daily Food Consumption/Animal (g)

| Sex: Female                           |      | Vehicle | Low Dose | Mid Dose | High Dose |
|---------------------------------------|------|---------|----------|----------|-----------|
| Week(s) Relative to Animal Start Date |      |         |          |          |           |
| 11 → 12                               | Mean | 18.8 n  | 19.9 n   | 19.1 n   | 23.6 n    |
|                                       | SD   | 0.93    | 0.54     | 0.47     | 6.87      |
|                                       | N    | 2       | 2        | 2        | 2         |
| 13                                    | Mean | 18.1 n  | 19.3 n   | 20.9 n   | 20.3 n    |
|                                       | SD   | 2.00    | 1.06     | 0.87     | 2.97      |
|                                       | N    | 2       | 2        | 2        | 2         |
| 12 → 13                               | Mean | 16.8 n  | 20.3 n   | 18.8 n   | 22.9 n    |
|                                       | SD   | 0.39    | 0.76     | 1.45     | 4.01      |
|                                       | N    | 2       | 2        | 2        | 2         |

---

n - Inappropriate for statistics

Table 5  
Summary of Rotating Rod Values

2759-001  
 A Single Dose Toxicity Study of Test Article Administered by Intrathecal Injection in Rats

Summary of Rotating Rod Values

Fall Time (sec)

| Sex: Male                     |      | Vehicle Control | Low Dose | Mid Dose | High Dose |
|-------------------------------|------|-----------------|----------|----------|-----------|
| Day(s) Relative to Start Date |      |                 |          |          |           |
| -1 [g]                        | Mean | 43.88           | 56.40    | 46.78    | 52.55     |
|                               | SD   | 15.24           | 22.26    | 18.96    | 23.23     |
|                               | N    | 10              | 10       | 10       | 10        |
| 28 [g]                        | Mean | 62.57           | 64.40    | 41.57    | 48.18     |
|                               | SD   | 8.38            | 10.83    | 20.03    | 23.98     |
|                               | N    | 5               | 5        | 5        | 5         |
| 90 [g]                        | Mean | 28.29           | 39.60    | 42.60    | 42.58     |
|                               | SD   | 22.43           | 19.78    | 33.92    | 8.35      |
|                               | N    | 5               | 5        | 5        | 5         |

2759-001  
 A Single Dose Toxicity Study of Test Article Administered by Intrathecal Injection in Rats

Summary of Rotating Rod Values

Fall Time (sec)

| Sex: Female                   |      | Vehicle Control | Low Dose | Mid Dose | High Dose |
|-------------------------------|------|-----------------|----------|----------|-----------|
| Day(s) Relative to Start Date |      |                 |          |          |           |
| -1 [g1]                       | Mean | 81.98           | 67.04    | 68.59    | 72.57     |
|                               | SD   | 36.79           | 12.94    | 23.91    | 19.47     |
|                               | N    | 10              | 10       | 10       | 10        |
| 28 [g]                        | Mean | 64.99           | 92.88    | 70.52    | 82.89     |
|                               | SD   | 14.66           | 37.17    | 21.19    | 18.97     |
|                               | N    | 5               | 5        | 5        | 5         |
| 90 [g]                        | Mean | 62.04           | 82.22    | 46.47    | 76.80     |
|                               | SD   | 19.72           | 27.81    | 25.80    | 40.67     |
|                               | N    | 5               | 5        | 5        | 5         |

---

[g1] - Anova & Dunnett (Log)  
 [g] - Anova & Dunnett

Appendix 1  
Amended Protocol, Protocol, and Deviations



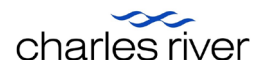

**PROTOCOL AMENDMENT NO. 4**

**Testing Facility Study No. 2759-001**

**Sponsor Reference No. CLN7-001**

**A Single Dose Toxicity Study of ~~Test Article~~ scAAV9/JeT-hCLN7opt-SV40pA  
Administered by Intrathecal Injection in Rats**

**SPONSOR:**

Foundation for Batten Hope  
3963 Maple Ave., Suite 390  
Dallas, TX 75219  
USA

**TESTING FACILITY:**

Charles River Laboratories, Inc.  
54943 North Main Street  
Mattawan, MI 49071  
USA

**SUMMARY OF CHANGES AND JUSTIFICATIONS**

Note: When applicable, additions are indicated in bold underlined text and deletions are indicated in bold strikethrough text in the affected sections of the document.

| <b>Item or Section(s)</b>                                                     | <b>Justification</b>                                                                                                                                                                                                                                                                                         |
|-------------------------------------------------------------------------------|--------------------------------------------------------------------------------------------------------------------------------------------------------------------------------------------------------------------------------------------------------------------------------------------------------------|
| <b>Amendment 1</b>                                                            | <b>Effective Date of Change: 19 October 2018</b>                                                                                                                                                                                                                                                             |
| 1.2. Proposed Study Schedule                                                  | Date updated to match the study schedule.                                                                                                                                                                                                                                                                    |
| 2.2. Dose Formulation Details                                                 | Added BSL2 wording based upon IBC review of the test article.                                                                                                                                                                                                                                                |
| 3.3. Test System Receipt                                                      | The number of animals ordered was updated to match the intended number due to the staggered study start. This will provide an appropriate number of spares to meet the study needs.                                                                                                                          |
| 4.2. Administration                                                           | Added BSL2 wording based upon IBC review of the test article.                                                                                                                                                                                                                                                |
| 5.5. Fusion v6 Rotating Rod System                                            | Updated for clarification.                                                                                                                                                                                                                                                                                   |
| 6.1. Animal Disposition                                                       | Details added for clarification which were originally omitted in error.                                                                                                                                                                                                                                      |
| 6.2. Postmortem Evaluations                                                   | Clarification of the trimming and histology procedures of the spinal cord and DRGs.                                                                                                                                                                                                                          |
| 6.3. qPCR and RT-qPCR Sample Collection and Analysis                          | Details added for clarification of the intended collection procedure.                                                                                                                                                                                                                                        |
| 8. STUDY REPORTS                                                              | Updated for clarification.                                                                                                                                                                                                                                                                                   |
| <b>Amendment 2</b>                                                            | <b>Effective Date of Change: 10 December 2018</b>                                                                                                                                                                                                                                                            |
| 1.3. Contact Information                                                      | Updated to include pathology assignment based upon project scheduling.                                                                                                                                                                                                                                       |
| 6.2. Postmortem Evaluations                                                   | Clarification of the trimming and histology procedures of the spinal cord and DRGs. The procedure for trimming was inadvertently not included in amendment 1, however was listed on the summary of changes. Updated pathology evaluation details and added slide shipment due to the pathologist assignment. |
| <b>Amendment 3</b>                                                            | <b>Effective Date of Change: 12 April 2019</b>                                                                                                                                                                                                                                                               |
| Title page                                                                    | Updated to reflect legal name change.                                                                                                                                                                                                                                                                        |
| 1.3. Contact information                                                      | Updated email addresses to current CRL emails.                                                                                                                                                                                                                                                               |
| 6.4. Organs or Tissues to be Weighed, Preserved, and Microscopically Examined | Histopathological examination of the thymus is added for all animals based upon initial pathology results.                                                                                                                                                                                                   |
| <b>Amendment 4</b>                                                            | <b>Effective Date of Change: 25 February 2020</b>                                                                                                                                                                                                                                                            |
| Study Title                                                                   | Addition of test article name to study title.                                                                                                                                                                                                                                                                |

## TABLE OF CONTENTS

|                                                              |    |
|--------------------------------------------------------------|----|
| 1. INTRODUCTION .....                                        | 4  |
| 2. DOSE FORMULATION AND PREPARATION .....                    | 7  |
| 3. TEST SYSTEM .....                                         | 9  |
| 4. STUDY DESIGN .....                                        | 11 |
| 5. ANTEMORTEM STUDY EVALUATIONS .....                        | 12 |
| 6. ANIMAL DISPOSITION AND POSTMORTEM STUDY EVALUATIONS ..... | 16 |
| 7. STATISTICS .....                                          | 25 |
| 8. STUDY REPORTS .....                                       | 27 |
| 9. DATA AND SPECIMEN RETENTION .....                         | 28 |
| 10. APPROVAL .....                                           | 29 |

## 1. INTRODUCTION

### 1.1. Study Objective

The objective of this study is to further characterize the toxicity, biodistribution, and gene expression of the test article. The test article is being developed for treatment of the neurodegenerative Batten Disease (CLN7 subtype).

### 1.2. Proposed Study Schedule

The following table contains proposed dates for study activities. Actual dates will be listed in the study report.

|                                                                                  |                                                           |
|----------------------------------------------------------------------------------|-----------------------------------------------------------|
| <u>Study Initiation Date:</u>                                                    | Date Study Director signs Study Approval in this protocol |
| <u>Experimental Start Date:</u><br><i>(First day of dosing)</i>                  | 14 September 2018                                         |
| <u>Experimental Termination Date:</u><br><i>(Last animal removed from study)</i> | 8 January 2019                                            |
| <u>Draft Report Mail Date:</u>                                                   | Approximately 10 weeks after final necropsy               |

### 1.3. Contact Information

Study Director: Sarah Davis, BS, LATG  
Tel: 269-668-3336 ext. 1250  
Fax: 269-668-4151  
E-mail: sarah.davis2@crl.com

Alternate Contact: Scott T. Wilson, BS, LAT  
Tel: 269-668-3336 ext. 1610  
Fax: 269-668-4151  
E-mail: scott.wilson@crl.com

Sponsor Representative: Gina Hann  
Tel: 520-331-6283  
E-mail: gina.hann@gmail.com

Alternate Sponsor Representative: Steven Gray, PhD  
Tel: 214-648-0670

E-mail: steven.gray@UTSouthwestern.edu

Principal Investigator Steven J Gray, PhD  
for Serum, CSF,  
qPCR, and RT-qPCR University of Texas Southwestern Medical Center - Gray Lab  
Sample Analysis: 6000 Harry Hines Blvd  
NA02.508  
Dallas, TX 75390  
Office: 214-648-0670  
Lab: 214-648-0671  
E-mail: steven.gray@UTSouthwestern.edu

Principal Investigator Odete R. Mendes, DVM, PhD, DACVP, DABT  
for Anatomic  
Pathology: Charles River Laboratories, Inc.  
4025 Stirrup Creek Drive  
Suite 150  
Durham, NC 27703  
Tel: 267-532-3958  
E-mail: Odete.Mendes@crl.com

Lead Quality Janis Kissel, BS, RQAP-GLP  
Assurance: Tel: 269-668-3336, ext. 3170  
Fax: 269-668-4151  
E-mail: janis.kissel@crl.com

#### 1.4. Regulatory Compliance, Animal Welfare Standards, and Study Guidelines

- Quality Assurance:
- Will assure compliance with the protocol, Testing Facility Standard Operating Procedures (SOPs) and the GLP regulations.
  - Will make available inspection records to the Sponsor Representatives during visits to Testing Facility.
- GLP Regulation:
- United States Food and Drug Administration (FDA) Good Laboratory Practice (GLP) Regulations, 21 Code of Federal Regulations (CFR) Part 58

Animal Welfare Standards:

- Guide for the Care and Use of Laboratory Animals<sup>1</sup>

Guidelines:

- Current International Council for Harmonisation (ICH) Harmonised Tripartite Guidelines and generally accepted procedures for the testing of pharmaceutical compounds.<sup>2</sup>

**1.5. Alteration of Design**

Changes to this approved protocol may be made as the study progresses, and all reasonable efforts will be made to discuss necessary changes, in advance, with the Sponsor. Due to the urgent or temporary nature of some protocol changes, the Study Director may authorize a change using a Planned Event form. The form will describe the change, the rationale for the change, and the effective date (or date range, in the instance of a temporary modification) of the change. Such situations will be considered planned deviations until the protocol amendment is prepared and signed, when applicable. In the instance of temporary modifications where a permanent change to the protocol will not be made, the situation will be considered a planned deviation and no protocol amendment will be issued. Resulting protocol amendments will be signed and dated by the Study Director and will identify the date of Sponsor approval, either written or verbal. Signed protocols and protocol amendments will be issued to the Sponsor, including the Sponsor Representative(s), the Sponsor Monitor(s), and the Principal Investigator(s), in addition to other key contact personnel listed in the protocol, and appropriate Testing Facility personnel.

**1.6. Proposed Computer Systems**

The following are the proposed computer systems to be used during the conduct of this study and their primary function. The actual systems and versions used will be documented in the final report.

| Computer System Name      | Description                                                                                                                                                         |
|---------------------------|---------------------------------------------------------------------------------------------------------------------------------------------------------------------|
| Logbook:                  | Electronic notebook and data collection system for veterinary communications, observations, and treatments.                                                         |
| Testing Facility ExyLIMS: | A comprehensive laboratory information management system used to manage data, including but not limited to: instrumentation, test articles, standards, and samples. |

<sup>1</sup> Guide for the Care and Use of Laboratory Animals. 8th ed., Washington, D.C., National Academies Press, 2011.

<sup>2</sup> Guidance on non-clinical safety studies for the conduct of human clinical trials and marketing authorization for pharmaceuticals. ICH M3(R2), 2009 June 11 (ICH Implementation Date).

| Computer System Name                                                                 | Description                                                                                                                                                                               |
|--------------------------------------------------------------------------------------|-------------------------------------------------------------------------------------------------------------------------------------------------------------------------------------------|
| NextDocs <sup>®</sup> :                                                              | Electronic documentation management of Deviation Events and Corrective and Preventative Actions (CAPA).                                                                                   |
| Provantis <sup>™</sup> :                                                             | Client-server, Oracle-based system used for electronic documentation and data management from compound receipt through reporting.                                                         |
| SAS <sup>®</sup> :                                                                   | An integrated system of software products that enables a user to perform data entry, retrieval, data management, reporting, graphics, statistical analysis, and applications development. |
| Siemens Environmental Monitoring and Niagara Framework <sup>®</sup> Software System: | Environmental monitoring, alarming, and reporting applications.                                                                                                                           |

## 2. DOSE FORMULATION AND PREPARATION

### 2.1. Test Article and Vehicle Information

#### 2.1.1. Test Article Information

Test Article Name: scAAV9/JeT-hCLN7opt-SV40pA

Storage Conditions: Frozen (-60 to -90°C)

Description: A description, lot number, storage conditions, expiration date, safe handling procedures, physical properties, as well as other relevant information will be documented in the study data.

Characterization: The Sponsor will provide documentation on the strength, purity, composition, stability, and other pertinent information on each batch of test article, unless otherwise noted. Note, if the Sponsor does not supply the above information (e.g. certificate of analysis), this will be listed on the Statement of Compliance in the final report.

Reserve Sample: A reserve sample from each lot of test and control articles used in this study will be collected and stored at Testing Facility in a secure area with the appropriate environmental controls. If multiple studies are conducted with the same test article, a common reserve sample may be taken and labeled and stored appropriately.

Test Article Contact: Gina Hann  
Tel: 520-331-6283  
E-mail: gina.hann@gmail.com

Test Article Disposition: The Sponsor will be contacted for proper disposition of materials (retain/ship/discard) after completion of the in-life phase of the study, and following confirmation that these materials are not assigned to other studies.

### 2.1.2. Vehicle Information

Vehicle Name: Isotonic phosphate-buffered saline containing 5% w/v sorbitol (provided by the sponsor)

Storage Conditions: The vehicle will be stored frozen (-60 to -90°C) until initial use. Once thawed, the vehicle should be stored refrigerated (2 to 8°C) and used within 2 weeks.

Characterization: The Sponsor will provide documentation on the strength, purity, composition, stability, and other pertinent information on each batch of control article, unless otherwise noted. Note, if the Sponsor does not supply the above information (e.g. certificate of analysis), this will be listed as a GLP exception in the final report.

### 2.2. Dose Formulation Details

Biosafety Level 2 (BSL2) procedures will be observed during any dose formulations in accordance with Testing Facility BSL2 Policy.

Preparation: Test article will be dispensed as instructed by the Sponsor. The high and middle doses will be used as supplied (without dilution). The low dose will be diluted 1:4 (i.e., 1 part test article and 3 parts vehicle) prior to injection.

Frequency: Dispensed on dosing days

Storage Conditions: Once thawed, the test article should be stored refrigerated (2 to 8°C), released on wet ice for administration, and used within 2 weeks.



### 3. TEST SYSTEM

#### 3.1. Test System Details

Species: Rat

Strain: CD<sup>®</sup> [CrI:CD<sup>®</sup>(SD)]

Source: Charles River Laboratories

#### 3.2. Justification of Test System

The current state of scientific knowledge and the applicable guidelines cited previously in this protocol do not provide acceptable alternatives, *in vitro* or otherwise, to the use of live animals to accomplish the purpose of this study. “The development of knowledge necessary for the improvement of the health and well-being of humans as well as other animals requires *in vivo* experimentation with a wide variety of animal species.”<sup>3</sup> “Whole animals are essential in research and testing because they best reflect the dynamic interactions between the various cells, tissues, and organs comprising the human body.”<sup>4</sup>

The rat is the usual rodent model<sup>5</sup> used for evaluating the toxicity of various classes of chemicals and for which there is a large historical database.

#### 3.3. Test System Receipt

Expected Age at Arrival: Ordered to be eight weeks of age at administration

Expected Weight at Arrival: Commensurate with age; males will generally weigh 215 to 260g and females will generally weigh 165 to 210g, as measured within three days of arrival. The actual range will be documented in the data.

Number Ordered:

Male: 69

Female: 69

Number on Study:

Male: 60

---

<sup>3</sup> “Principles for the Utilization and Care of Vertebrate Animals Used in Testing, Research, and Training”, Federal Register, 1985 May 20; 50(97).

<sup>4</sup> “Position Statement on the Use of Animals in Research”, 1993 Feb 26; NIH Guide 22(8).

<sup>5</sup> Guidance for Industry, Investigators, and Reviewers: Exploratory IND Studies, U.S. F.D.A. Center for Drug Evaluation and Research (CDER), 2006 Jan.

Female: 60

Acclimation Duration: At least one week from initial receipt of animals to Testing Facility.

Acclimation Details: During this acclimation period, all animals will be observed daily for any clinical signs of disease, and all animals will be given a detailed clinical examination prior to selection for study.

### 3.4. Selection for Study

Body Weight Range:  $\pm 20\%$  of the mean body weight for each sex

Randomization: By sex, into treatment groups using a standard, by weight, randomization procedure.  
All animals with any evidence of disease or physical abnormalities will not be selected for study.

### 3.5. Method of Identification

Each animal will be assigned an animal number to be used in Provantis™ and will be implanted with a microchip bearing a unique identification number. The individual animal number, implant number, and the Testing Facility study number will comprise a unique identification for each animal. The animal cage will be identified by the study number, animal number, group number, and sex.

### 3.6. Husbandry

Housing: Pair-housed, when possible (animals may be housed two to three/cage during acclimation and in-life depending on study design)

Caging: Solid bottom cages with nonaromatic bedding. The bedding will be from an approved supplier and documented in the study data.

Temperature and Humidity: Temperature and humidity will be maintained according to Testing Facility SOP.

Lighting: Fluorescent lighting will be provided via an automatic timer for approximately 12 hours per day. On occasion, the dark cycle may be interrupted intermittently due to study-related activities.

Water: Tap water will be supplied *ad libitum* to all animals via an automatic water system unless otherwise indicated.

Diet: The basal diet will be block Lab Diet® Certified Rodent Diet #5002, PMI Nutrition International, Inc. This diet will be available *ad libitum* unless designated otherwise. Each lot number used will be identified in the study records.

Water and Diet Contaminants: There are no known contaminants in the food or water that would interfere with this study. The drinking water used will be monitored for specified contaminants at periodic intervals according to Testing Facility SOP.

Supplemental Enrichment: Animal enrichment will be provided according to Testing Facility SOP.

#### 4. STUDY DESIGN

| Group                           | Treatment                   | Dose Level<br>(vg/animal) | Dose Volume<br>(µL) | Dose Concentration<br>(vg/µL) | Number of Animals |    |                 |    |                 |    |
|---------------------------------|-----------------------------|---------------------------|---------------------|-------------------------------|-------------------|----|-----------------|----|-----------------|----|
|                                 |                             |                           |                     |                               | Necropsy Day 8    |    | Necropsy Day 29 |    | Necropsy Day 91 |    |
|                                 |                             |                           |                     |                               | M                 | F  | M               | F  | M               | F  |
| 1                               | Vehicle                     | 0                         | 60 µL               | 0                             | 5                 | 5  | 5               | 5  | 5               | 5  |
| 2                               | Test Article<br>Low Dose    | 5x10 <sup>11</sup>        | 20 µL               | 2.5x10 <sup>10</sup>          | 5                 | 5  | 5               | 5  | 5               | 5  |
| 3                               | Test Article<br>Middle Dose | 2x10 <sup>12</sup>        | 20 µL               | 1x10 <sup>11</sup>            | 5                 | 5  | 5               | 5  | 5               | 5  |
| 4                               | Test Article<br>High Dose   | 6x10 <sup>12</sup>        | 60 µL               | 1x10 <sup>11</sup>            | 5                 | 5  | 5               | 5  | 5               | 5  |
| <b>Total Number of Animals:</b> |                             |                           |                     |                               | 20                | 20 | 20              | 20 | 20              | 20 |

##### 4.1. Justification of Dose Levels

The dose level was selected by the Sponsor, or in consultation with the Sponsor, on the basis of available data from previous studies and discussion with the FDA in a preIND meeting. The low and middle doses have been tolerated well in pilot mouse studies, and the middle dose is the target dose to model the proposed clinical dose in CLN7 patients. The middle dose has shown sufficient to improve pathological signatures of the disease in mice. Per the discussion with the FDA, we were advised to bracket the “middle” target dose with lower and higher doses to complete the dose-responsive nature of any effect.

##### 4.2. Administration

Biosafety Level 2 (BSL2) procedures will be observed during any test article administration procedures in accordance with Testing Facility BSL2 Policy.

Route: Intrathecal (IT) injection

Frequency/Duration: The test article and vehicle will be administered once on Day 1.

Details: Animals will be anesthetized with Isoflurane and placed in a ventral recumbency and the lumbar cistern will be accessed via a percutaneous needle stick. The location of the needle may be verified using fluoroscopy. Once the needle is in place, the test article will be injected and the needle removed. Animals will then be allowed to recover. The test article will be left at room temperature for 15 to 30 minutes prior to dosing but no more than 2 hours.

### **4.3. Justification for Route of Administration**

Intrathecal injection is the intended route of administration of this test article in humans.

## **5. ANTEMORTEM STUDY EVALUATIONS**

### **5.1. Cageside Observations**

Frequency: At least twice daily

Details: Animals will be observed for morbidity, mortality, injury, and availability of food and water. Any animals in poor health will be identified for further monitoring and possible euthanasia.

### **5.2. Detailed Clinical Observations**

Frequency: Weekly

Details: Observations will include, but will not be limited to, evaluation of the skin, fur, eyes, ears, nose, oral cavity, thorax, abdomen, external genitalia, limbs and feet, respiratory and circulatory effects, autonomic effects such as salivation, nervous system effects including tremors, convulsions, reactivity to handling, unusual behavior.

### **5.3. Body Weight**

Frequency: Within three days of arrival, at least once prior to randomization and/or Day -1, and once weekly thereafter.

### **5.4. Food Consumption**

Frequency: Weekly

**5.5. Fusion v6 Rotating Rod System**

Frequency: Animals scheduled for Day 29 and Day 91 necropsy only: predose and prior to their respective necropsy.

Details: The apparatus is set to accelerate from -4 rpm to -40 rpm (the negative sign indicates direction, in this case it means the animal will ambulate away from the observer) over the course of 3 minutes. This indicates that the rod will be accelerating at a rate of 0.2 revolutions per second. The elapsed time from the start of the trial to the animal's fall and the speed of the rod at the time of the fall is recorded digitally by the instrument. Each animal will perform 3 consecutive trials with at least 15 minutes between trials. The average of all 3 trials will be reported for each animal.

The morning of each testing a training session will be conducted. The training session will consist of the animal being placed on a rotating rod which is set to a constant speed of -4 rpm for 3 minutes. Animals that fall off during training are immediately placed back on the rotating rod until the 3 minutes is completed. Data from the training sessions will not be reported.

The computer software is not validated and this will be listed as a GLP exception in the final report.

**5.6. Clinical Pathology Sample Collection and Analysis**

Fasting Requirements: Free access to drinking water but fasted overnight prior to blood collection.

Blood Sample Volume:

|                     |              |
|---------------------|--------------|
| Hematology:         | 0.5 to 1mL   |
| Coagulation:        | 1.2mL        |
| Clinical Chemistry: | 0.8 to 1.3mL |

Site of Blood Sample Collection: Vena cava after carbon dioxide inhalation

Anticoagulant:

|                     |                     |
|---------------------|---------------------|
| Hematology:         | K <sub>2</sub> EDTA |
| Coagulation:        | Sodium Citrate      |
| Clinical Chemistry: | Serum Separator     |

Sample Disposition: All samples will be disposed of per Testing Facility SOP.

The following clinical pathology tests will be conducted on available samples and as survival allows.

| Sample Type               | Number of Animals | Intervals   | Parameters Evaluated                                                                                                                                                                                                                                                                                                                                                                                                                                                                                                                                                                                    |
|---------------------------|-------------------|-------------|---------------------------------------------------------------------------------------------------------------------------------------------------------------------------------------------------------------------------------------------------------------------------------------------------------------------------------------------------------------------------------------------------------------------------------------------------------------------------------------------------------------------------------------------------------------------------------------------------------|
| <b>Hematology</b>         | All               | Termination | <ul style="list-style-type: none"> <li>• leukocyte count (total and absolute differential)</li> <li>• erythrocyte count</li> <li>• hemoglobin</li> <li>• hematocrit</li> <li>• mean corpuscular hemoglobin, mean corpuscular volume, mean corpuscular hemoglobin concentration (calculated)</li> <li>• absolute reticulocytes</li> <li>• platelet count</li> <li>• RDW</li> <li>• blood smear preserve and stain*</li> </ul> <p>*blood smear review may be performed on select animals per Testing Facility SOP.</p>                                                                                    |
| <b>Coagulation</b>        | All               | Termination | <ul style="list-style-type: none"> <li>• prothrombin time</li> <li>• activated partial thromboplastin time</li> <li>• fibrinogen</li> </ul>                                                                                                                                                                                                                                                                                                                                                                                                                                                             |
| <b>Clinical Chemistry</b> | All               | Termination | <ul style="list-style-type: none"> <li>• alkaline phosphatase</li> <li>• total bilirubin (with direct bilirubin if total bilirubin exceeds 1 mg/dL)</li> <li>• aspartate aminotransferase</li> <li>• alanine aminotransferase</li> <li>• urea nitrogen</li> <li>• creatinine</li> <li>• total protein</li> <li>• albumin</li> <li>• globulin and A/G (albumin/globulin) ratio (calculated)</li> <li>• glucose</li> <li>• total cholesterol</li> <li>• triglycerides</li> <li>• electrolytes (sodium, potassium, chloride)</li> <li>• calcium</li> <li>• phosphorus</li> <li>• sample quality</li> </ul> |

## 5.7. Serum Sample Collection and Analysis

### 5.7.1. Sample Collection

| Group(s) | Animals/Sex/Interval | Interval    |
|----------|----------------------|-------------|
| All      | All                  | Termination |

|                                                 |                                                                                                                             |
|-------------------------------------------------|-----------------------------------------------------------------------------------------------------------------------------|
| <u>Fasting Requirements:</u>                    | The animals will not be fasted before blood collection unless concurrent with fasting for other procedures.                 |
| <u>Collection Site:</u>                         | Vena cava after carbon dioxide inhalation                                                                                   |
| <u>Whole Blood Volume/Sample:</u>               | Blood: 0.6 to 1 mL                                                                                                          |
| <u>Anticoagulant:</u>                           | Serum separator                                                                                                             |
| <u>Whole Blood Storage:</u>                     | Room Temperature                                                                                                            |
| <u>Additional Container Label Requirements:</u> | Testing Facility study number, relative study day, animal number, and the date and time interval of collection.             |
| <u>Sample Requirements:</u>                     | Serum: 3 aliquots, 100 µL each. If the total volume of serum is less than 300 µL, then lower equal aliquots are acceptable. |
| <u>Special Requirements:</u>                    | The serum may be initially stored on dry ice.                                                                               |
| <u>Final Storage Temperature:</u>               | Processed samples will be placed on dry ice or in frozen (-60 to -90°C) storage within 60 minutes of centrifugation.        |

## 5.7.2. Sample Handling and Analysis

### 5.7.2.1. Sample Handling

|                                             |                                                                                                                                                                                                              |
|---------------------------------------------|--------------------------------------------------------------------------------------------------------------------------------------------------------------------------------------------------------------|
| <u>Shipping Conditions:</u>                 | Frozen on dry ice                                                                                                                                                                                            |
| <u>Primary Contact for Sample Shipment:</u> | Erik Lykken<br>Attn: Gray Lab<br>6000 Harry Hines Blvd<br>NA02.508<br>University of Texas Southwestern Medical Center<br>Dallas, TX 75390<br>Tel: 214-648-0671<br><br>E-mail: Erik.Lykken@UTSouthwestern.edu |

Shipping Details: Samples will be shipped on Monday through Wednesday for next day delivery. The primary contact will be notified prior to each shipment.

### 5.7.2.2. Serum Analysis

Analysis Performed by: The analytical work will be conducted by a Sponsor-contracted laboratory, the Laboratory of Dr. Steven Gray, using an analytical method to be added by amendment if sample analysis is conducted. Samples may be retained for possible future analysis.

Regulatory Requirements: The work performed in conjunction with this study will not be conducted in compliance with GLPs. A final report will be prepared and submitted to the Sponsor and Test Facility for inclusion as an appendix in the main study final report., if sample analysis is conducted.

Sample Disposition: Following analysis, any residual samples or backup samples will be retained by the Test Facility (The Laboratory of Dr. Steven Gray) as per their respective SOPs. Any unshipped back up samples remaining at Testing Facility will be archived by Testing Facility.

## 6. ANIMAL DISPOSITION AND POSTMORTEM STUDY EVALUATIONS

### 6.1. Animal Disposition

Moribundity: Moribund animals will be subject to Testing Facility SOP criteria and procedures. If possible, the samples below will be collected from animals euthanized *in extremis*, following veterinary consultation. A veterinary consultation is not required if the samples are collected following anesthesia or euthanasia. Blood collection methods utilized for animals euthanized *in extremis* may include suitable methods other than those presented in the respective blood collection section(s) of this protocol.

| Sample Type        | Groups | Volume         | Anticoagulant       |
|--------------------|--------|----------------|---------------------|
| Hematology         | All    | 1mL            | K <sub>2</sub> EDTA |
| Coagulation        |        | 1.2mL          | Citrate             |
| Clinical Chemistry |        | 1.3mL          | Serum Separator     |
| Serum              | All    | 0.6 to 1 mL    | Serum Separator     |
| CSF                | All    | Max attainable | None                |

Necropsy examinations will be performed seven days a week. Animals that are found dead or euthanized *in extremis* after regular working hours will be refrigerated overnight and necropsies performed at the start of the next day. Any animal found dead or euthanized *in extremis* will undergo



a gross necropsy examination and macroscopic observations will be recorded. Protocol designated tissues will be saved from these animals.

Method of Euthanasia: Euthanasia will be by carbon dioxide inhalation followed by an Testing Facility SOP approved method to ensure death, e.g. exsanguination.

Disposition of Animals Not Assigned: Extra animals obtained for this study, but not placed on study, will be either transferred to a Testing Facility stock or training colony, or euthanized and discarded. The final disposition of each animal will be documented in the study records.

Disposition of Study Animals: All main study animals will be euthanized and subjected to a complete necropsy examination, performed under procedures approved by a veterinary pathologist in accordance with Testing Facility SOP.

## 6.2. Postmortem Evaluations

Necropsy Schedule: Terminal: Day 8, Day 29, and Day 91

External Evaluations: The animals will be examined carefully for external abnormalities including palpable masses.

Macroscopic Evaluations: The skin will be reflected from a ventral midline incision, and any subcutaneous masses will be identified and correlated with antemortem findings. The abdominal, thoracic, and cranial cavities will be examined for abnormalities and the organs removed, examined, and, where required, placed in the appropriate fixative.

Tissue Fixation: All tissues will be placed in a neutral buffered formalin, except that the eyes, including the optic nerves, and testes will be fixed using a modified Davidson's fixative<sup>6</sup>. Eyes and testes will be placed into formalin after fixation. Formalin will be infused into the lung via the trachea and into the urinary bladder.

Organ Weights: Body weight and the organ weights identified in the organ list table will be recorded for all animals at the scheduled necropsies, and appropriate organ weight ratios will be calculated (relative to body and brain weights). Paired organs will be weighed together. Organs will not be weighed for animals found dead or euthanized *in extremis*.

---

<sup>6</sup> Latendresse JR, Warbritton AR, Jonassen H, Creasy DM. Fixation of testes and eyes using a modified Davidson's fluid: comparison with Bouin's fluid and conventional Davidson's fluid. Toxicol Pathol. 2002 Jul Aug;30(4):524-33.

A combined weight of the thyroid gland with parathyroid glands will be obtained, and the right mandibular/sublingual salivary glands will be weighed together. The thyroid/parathyroid gland and pituitary gland will be weighed following fixation.

Microscopic Evaluation:

Microscopic examination of fixed hematoxylin and eosin-stained paraffin sections will be performed on sections of tissues and from the groups and/or intervals identified in the following table and all animals found dead or euthanized *in extremis*.

Handling of Specific Tissues:

Bone marrow smears will not be prepared for animals found dead but will be prepared for animals euthanized *in extremis* (with the exception of euthanized animals requiring refrigeration prior to necropsy).

The spinal cord and DRG (cervical, lumbar, thoracic) will be collected in situ. The samples will be decalcified and embedded in paraffin with cross-sections that include the spinal cord, nerve roots, and DRG.

At the time of trimming, the spinal cord will be opened up to remove bilateral DRGs (to include nerve roots, when possible) from the cervical, thoracic, and lumbar regions of the spinal column. The DRGs will each be submitted for processing in individual tissue cassettes, and left/right orientation will be maintained. Spinal cord sections adjacent to the harvested DRGs will be trimmed and submitted for processing.

Additional Testing:

Evaluation of the bone marrow smears will be performed at the discretion of the Study Director and/or Sponsor.

The pathologist may use special stains and techniques as needed to aid in the diagnosis of specific lesions. If after routine sectioning, a tissue is missed, one recut will be requested either by re-sectioning the tissue in the block or ordering a wet tissue recut. If the tissue is still missing, the block will not be re-sectioned unless the missing tissue is determined to be a potential target organ. In this case, the tissue will be re-sectioned until located or until it is determined that it is not present in the block or in wet tissue. Non-protocol-required tissues that are coincidentally within the plane of a protocol-required tissue will be examined by the study pathologist, and any findings that impact the interpretation of the study will be documented. In some instances, tissues may be collected and processed to paraffin block or glass slide stage prior to defining the tissues required for microscopic examination (e.g., intermediate and/or recovery groups). In these cases, only protocol-required tissues will be examined microscopically and other tissues present on the slide will not be examined.

Digital images for illustrative purposes may be taken. These images will not be used for data generation or interpretation, and will not be archived or included in the final report.

Pathology  
Evaluation:

All required slides will be shipped under ambient conditions to Charles River Laboratories, Inc., for microscopic evaluation.

| Primary Contact for Sample Shipment                                                                                                                                                          |
|----------------------------------------------------------------------------------------------------------------------------------------------------------------------------------------------|
| Odete R. Mendes, DVM, PhD, DACVP, DABT<br>Charles River Laboratories, Inc.<br>4025 Stirrup Creek Drive<br>Suite 150<br>Durham, NC 27703<br>Tel: 267-532-3958<br>E-mail: Odete.Mendes@crl.com |

Any handling of slides performed by Charles River Laboratories, Inc. in conjunction with this study will be conducted in compliance with GLPs, in accordance with Charles River Laboratories, Inc. SOP's.

Microscopic findings will be directly entered into the Testing Facility's Provantis database via remote access and will be performed in accordance with Testing Facility SOP's. Testing Facility will provide all necessary tables to the Anatomic Pathology Principal Investigator for interpretation of the macroscopic and organ weight findings. The microscopic tables will be generated by the Test Site in the Testing Facility's Provantis database via remote access. The Pathology Principal Investigator Report will be prepared by the Test Site and audited by the Test Site Quality Assurance Unit.

All slides, all other study related materials, and data will be sent to Testing Facility for archival when the request to finalize the Pathology Principal Investigator Report is received.

### 6.3. qPCR and RT-qPCR Sample Collection and Analysis

qPCR Sample  
Collection:

Each organ/tissue sample will be divided in half; one part used for DNA purification and the other part used for RNA purification.

When possible, duplicate samples will be collected (4 total per tissue/organ) as long as each sample is  $\geq 10$  mg.

Samples of the organs or tissues collected for qPCR will be placed in labeled 2-mL microfuge tubes (one tube/sample), snap-frozen into liquid nitrogen, and then stored at  $-60^{\circ}\text{C}$  to  $-90^{\circ}\text{C}$  until shipped to the Sponsor designated laboratory for analysis. Samples collected for RT-qPCR analysis of the transgene mRNA will be completely immersed into labeled 2 mL microfuge tubes prefilled with 1.5 mL RNALater. Samples will be stored refrigerated (2 to  $8^{\circ}\text{C}$ ) for up to 24 hours and then stored frozen ( $-60$  to  $-90^{\circ}\text{C}$ ) with the RNALater removed until shipped to the Sponsor designated laboratory for analysis.

The samples for DNA analysis will be collected using strict aseptic techniques and disposable instruments for each tissue or organ. For paired organs, one complete organ will be saved for microscopic examination and a portion of the second organ or the entire organ will be collected for qPCR and RT-qPCR. Care will be given to ensure that cross contamination between tissues does not occur. Gloves will be changed between collection and dissection of each tissue for PCR analysis. In addition, non-disposable instruments will be wiped down with a 10% bleach solution, rinsed with water followed by a wipe down of 100% ethanol between groups. The cutting board will be wiped down with a 10% bleach solution, rinsed with water followed by a wipe down of 100% ethanol between each of the specified organs or sterile trays may be used. The tissues for PCR analysis will be collected prior to sample collection for any other parameters. Samples for qPCR and RT-qPCR will not be collected for animals found dead or euthanized *in extremis*.

qPCR and RT-qPCR If deemed necessary by the sponsor, qPCR and/or RT-qPCR analysis will be conducted. Purified DNA will be used as template for qPCR to detect the transgene in each sample relative to a genomic DNA reference, with a sensitivity of  $\leq 50$  copies of vector DNA per microgram of rat genomic DNA. Purified RNA will be used for cDNA synthesis, and the cDNA of the optimized human CLN7 will be quantified relative to endogenous rat GAPDH cDNA and rat CLN7 cDNA levels. Only tissues found positive for vector presence at  $\geq 50$  double-stranded copy of vector DNA per  $1 \mu\text{g}$  rat DNA will be tested for gene expression by RNA analysis.

Sample analysis:

**6.3.1. Sample Handling and Analysis****6.3.1.1. Sample Handling**

Shipping Conditions: Frozen on dry ice

Primary Contact for Erik Lykken

Sample Shipment:

Attn: Gray Lab

6000 Harry Hines Blvd

NA02.508

University of Texas Southwestern Medical Center

Dallas, TX 75390

Tel: 214-648-0671

E-mail: [Erik.Lykken@UTSouthwestern.edu](mailto:Erik.Lykken@UTSouthwestern.edu)

Shipping Details: Samples will be shipped on Monday through Wednesday for next day delivery. The primary contact will be notified prior to each shipment.

**6.3.1.2. qPCR and RT-qPCR Sample Analysis**

Analysis Performed by: If needed, the analytical work will be conducted by a Sponsor-contracted laboratory, the Laboratory of Dr. Steven Gray, using an analytical method to be added by amendment if sample analysis is conducted. Samples may be retained for possible future analysis.

Regulatory Requirements: The work performed in conjunction with this study will not be conducted in compliance with GLPs. A final report will be prepared and submitted to the Sponsor and Test Facility for inclusion as an appendix in the main study final report, if sample analysis is conducted.

Sample Disposition: Following analysis, any residual samples or backup samples will be retained by the Test Facility (The Laboratory of Dr. Steven Gray) as per their respective SOPs. Any unshipped back up samples remaining at Testing Facility will be archived by Testing Facility.

**6.4. Organs or Tissues to be Weighed, Preserved, and Microscopically Examined**

| <b>Organ</b>       | <b>Weigh</b> | <b>Collect at Necropsy</b> | <b>Histology Processing</b> | <b>Histopathology Evaluation Groups<sup>2</sup><br/>All Groups</b> | <b>Biodistribution/Gene Expression<br/>All Groups</b> |
|--------------------|--------------|----------------------------|-----------------------------|--------------------------------------------------------------------|-------------------------------------------------------|
| Animal ID          | -            | X                          | -                           | -                                                                  |                                                       |
| Artery, aorta      | -            | X                          | -                           | -                                                                  |                                                       |
| Body cavity, nasal | -            | X                          | -                           | -                                                                  |                                                       |

| <b>Organ</b>                                                                                                     | <b>Weigh</b>                                    | <b>Collect at Necropsy</b>                   | <b>Histology Processing</b> | <b>Histopathology Evaluation Groups<sup>2</sup><br/>All Groups</b> | <b>Biodistribution/Gene Expression<br/>All Groups</b> |
|------------------------------------------------------------------------------------------------------------------|-------------------------------------------------|----------------------------------------------|-----------------------------|--------------------------------------------------------------------|-------------------------------------------------------|
| Bone marrow                                                                                                      | -                                               | X                                            | -                           | -                                                                  |                                                       |
| Bone marrow smear                                                                                                | -                                               | X <sup>1</sup>                               | -                           | -                                                                  |                                                       |
| Bone, femur (one)                                                                                                | -                                               | X                                            | -                           | -                                                                  |                                                       |
| Bone, sternum                                                                                                    | -                                               | X                                            | -                           | -                                                                  |                                                       |
| Brain- at least 3 coronal cross sections (hindbrain including brainstem and cerebellum, midbrain, and forebrain) | X                                               | X                                            | X                           | X                                                                  | X                                                     |
| Cervix                                                                                                           | -                                               | X                                            | -                           | -                                                                  |                                                       |
| Epididymis (both)                                                                                                | X                                               | X                                            | -                           | -                                                                  |                                                       |
| Esophagus                                                                                                        | -                                               | X                                            | -                           | -                                                                  |                                                       |
| Eye (both)                                                                                                       | -                                               | X                                            | -                           | -                                                                  |                                                       |
| Gland, adrenal (both)                                                                                            | X                                               | X                                            | -                           | -                                                                  |                                                       |
| Gland, clitoral (both)                                                                                           | -                                               | X                                            | -                           | -                                                                  |                                                       |
| Gland, lacrimal (both, extra-orbital)                                                                            | -                                               | X                                            | -                           | -                                                                  |                                                       |
| Gland, Harderian                                                                                                 | -                                               | X (both)                                     | -                           | -                                                                  |                                                       |
| Gland, mammary                                                                                                   | -                                               | X                                            | -                           | -                                                                  |                                                       |
| Gland, parathyroid (both)                                                                                        | -                                               | X                                            | -                           | -                                                                  |                                                       |
| Gland, pituitary                                                                                                 | X                                               | X                                            | -                           | -                                                                  |                                                       |
| Gland, preputial (both)                                                                                          | -                                               | X                                            | -                           | -                                                                  |                                                       |
| Gland, prostate                                                                                                  | X                                               | X                                            | -                           | -                                                                  |                                                       |
| Gland, salivary                                                                                                  | X (right mandibular/sublingual salivary glands) | X (both sub-mandibular, sublingual, parotid) | -                           | -                                                                  |                                                       |
| Gland, seminal vesicle (both)                                                                                    | -                                               | X                                            | -                           | -                                                                  |                                                       |
| Gland, thyroid (both)                                                                                            | X                                               | X                                            | -                           | -                                                                  |                                                       |
| Gland, Zymbal's (both)                                                                                           | -                                               | X                                            | -                           | -                                                                  |                                                       |
| Gut-associated lymphoid tissue                                                                                   | -                                               | X                                            | -                           | -                                                                  |                                                       |
| Heart                                                                                                            | X                                               | X                                            | X                           | X                                                                  | X                                                     |
| Joint, femorotibial (one)                                                                                        | -                                               | X                                            | -                           | -                                                                  | -                                                     |
| Kidney (both)                                                                                                    | X                                               | X                                            | X                           | X                                                                  | X                                                     |
| Large intestine, cecum                                                                                           | -                                               | X                                            | -                           | -                                                                  | -                                                     |
| Large intestine, colon                                                                                           | -                                               | X                                            | -                           | -                                                                  | -                                                     |
| Large intestine, rectum                                                                                          | -                                               | X                                            | -                           | -                                                                  | -                                                     |
| Larynx                                                                                                           | -                                               | X                                            | -                           | -                                                                  | -                                                     |
| Liver                                                                                                            | X                                               | X                                            | X                           | X                                                                  | X                                                     |
| Lung                                                                                                             | X                                               | X                                            | X                           | X                                                                  | X                                                     |
| Lymph node, mandibular                                                                                           | -                                               | X (both)                                     | X (one)                     | X (one)                                                            | X                                                     |
| Lymph node, mesenteric                                                                                           | -                                               | X                                            | X                           | X                                                                  | X                                                     |

| <b>Organ</b>                                           | <b>Weigh</b> | <b>Collect at Necropsy</b> | <b>Histology Processing</b> | <b>Histopathology Evaluation Groups<sup>2</sup><br/>All Groups</b> | <b>Biodistribution/Gene Expression<br/>All Groups</b> |
|--------------------------------------------------------|--------------|----------------------------|-----------------------------|--------------------------------------------------------------------|-------------------------------------------------------|
| Macroscopic abnormalities                              | -            | X                          | X                           | X                                                                  | -                                                     |
| Muscle, skeletal (bicep femoris and gastrocnemius)     | -            | X                          | X                           | X                                                                  | X                                                     |
| Nasopharynx                                            | -            | X                          | -                           | -                                                                  | -                                                     |
| Nerve, optic (both)                                    | -            | X                          | -                           | -                                                                  | -                                                     |
| Nerve, sciatic                                         | -            | X (both)                   | -                           | -                                                                  | -                                                     |
| Ovary (both)                                           | X            | X                          | X                           | X                                                                  | X                                                     |
| Oviduct (both)                                         | X            | X                          | -                           | -                                                                  | -                                                     |
| Pancreas                                               | -            | X                          | -                           | -                                                                  | -                                                     |
| Skin                                                   | -            | X                          | -                           | -                                                                  | -                                                     |
| Small intestine, duodenum                              | -            | X                          | -                           | -                                                                  | -                                                     |
| Small intestine, ileum                                 | -            | X                          | -                           | -                                                                  | -                                                     |
| Small intestine, jejunum                               | -            | X                          | -                           | -                                                                  | -                                                     |
| Spinal cord, cervical (to include DRG and nerve roots) | -            | X                          | X                           | X                                                                  | X                                                     |
| Spinal cord, thoracic (to include DRG and nerve roots) | -            | X                          | X                           | X                                                                  | X                                                     |
| Spinal cord, lumbar (to include DRG and nerve roots)   | -            | X                          | X                           | X                                                                  | X                                                     |
| Spleen                                                 | X            | X                          | X                           | X                                                                  | -                                                     |
| Stomach                                                | -            | X                          | -                           | -                                                                  | -                                                     |
| Testis (both)                                          | X            | X                          | X                           | X                                                                  | X                                                     |
| Thymus                                                 | X            | X                          | X                           | X                                                                  | -                                                     |
| Tongue                                                 | -            | X                          | -                           | -                                                                  | -                                                     |
| Trachea                                                | -            | X                          | -                           | -                                                                  | -                                                     |
| Ureter (both)                                          | -            | X                          | -                           | -                                                                  | -                                                     |
| Urinary bladder                                        | -            | X                          | -                           | -                                                                  | -                                                     |
| Uterus                                                 | X            | X                          | -                           | -                                                                  | -                                                     |
| Vagina                                                 | -            | X                          | -                           | -                                                                  | -                                                     |

X = Procedure to be conducted; - = Not applicable.

<sup>1</sup> Two bone marrow smears will be collected from the femur at scheduled and unscheduled necropsies (for possible examination). Smears will not be collected from animals that are found dead or from animals that were euthanized moribund and then stored in the refrigerator prior to necropsy. Bone marrow smears are allowed to air dry and are not fixed in formalin.

<sup>2</sup> At the discretion of the Study Pathologist, findings for extraneous tissues (non-protocol tissues that may be present on a slide as a result of collection of protocol tissues) will also be recorded when observed.

## 6.5. Cerebrospinal Fluid (CSF) Sample Collection and Analysis

### 6.5.1. Sample Collection

Frequency: All animals at termination and animals euthanized *in extremis*

CSF Volume/Sample: Max attainable

Anticoagulant: None

Additional Container Label Requirements: Testing Facility study number, relative study day, animal number, and the date and time interval of collection.

Sample Requirements: 2 approximately equal aliquots

Final Storage Temperature: Frozen (-60 to -90°C)

### 6.5.2. Sample Handling and Analysis

#### 6.5.2.1. Sample Handling

Shipping Conditions: Frozen on dry ice

Primary Contact for Sample Shipment: Erik Lykken, PhD  
Attn: Gray Lab  
6000 Harry Hines Blvd  
NA02.508  
University of Texas Southwestern Medical Center  
Dallas, TX 75390  
Tel: 214-648-0671  
E-mail: [Erik.Lykken@UTSouthwestern.edu](mailto:Erik.Lykken@UTSouthwestern.edu)

Shipping Details: Samples will be shipped on Monday through Wednesday for next day delivery. The primary contact will be notified prior to each shipment.

#### 6.5.2.2. CSF Analysis

Analysis Performed by: If needed, the analytical work will be conducted by a Sponsor-contracted laboratory, the Laboratory of Dr. Steven Gray, using an analytical method to be added by amendment if sample analysis is conducted. Samples may be retained for possible future analysis.



Regulatory Requirements: The work performed in conjunction with this study will not be conducted in compliance with GLPs. A final report will be prepared and submitted to the Sponsor and Test Facility for inclusion as an appendix in the main study final report, if sample analysis is conducted.

Sample Disposition: Following analysis, any residual samples or backup samples will be retained by the Test Facility (The Laboratory of Dr. Steven Gray) as per their respective SOPs. Any unshipped back up samples remaining at Testing Facility will be archived by Testing Facility.

## 7. STATISTICS

The following presents a proposed statistical analysis plan. Statistical plans are data dependent, and this analysis plan may require modification if standard data assumptions are not met. Other conceptually equivalent statistical testing routines may also be employed at the discretion of the statistician. The actual analysis plan will be documented in the final report.

The raw data will be tabulated within each time interval, and the appropriate summary statistics will be calculated for each endpoint, sex, and group. For each endpoint, treatment groups will be compared to the control group using the analysis outlined below. Data for some endpoints, as indicated, will be transformed by either a log or rank transformation prior to conducting the specified analysis.

### 7.1. Statistical Comparisons

| Control Group | Comparison Group(s) |
|---------------|---------------------|
| 1             | 2, 3, 4             |

### 7.2. Group Pair-wise Comparison (General ANOVA)

Endpoints:

- Body Weight and Body Weight Change
- Food Consumption
- Hematology
- Coagulation
- Clinical Chemistry
- Organ Weights
  - Absolute Weights
  - Relative to Body and Brain Weights
- Urinalysis
  - Urine Volume
  - Specific Gravity
  - pH

Description: The experimental unit for the analysis of food consumption will be cage, while for all other endpoints the experimental unit will be the individual

animal. Food consumption will be calculated as described in Testing Facility SOP.

If the control group has a sample size less than three, no inferential statistics will be calculated. If a particular endpoint and/or parameter within a given collection interval have the same value across all experimental units, no inferential statistics will be calculated.

Otherwise, for endpoints and/or parameters where all groups with sample sizes of three or greater are included, the system will test the normality of the residuals and homogeneity of variances to see whether the data is approximately normal or whether a log transformation or rank transformation should be used. Levene's test<sup>7</sup> will be used to assess homogeneity of group variances and Shapiro-Wilk's<sup>8</sup> test will be used to test the normality of the residuals.

On the raw data, if Levene's test is not significant ( $p \geq 0.01$ ) and Shapiro-Wilk's test is not significant ( $p \geq 0.01$ ), then a normal distribution will be used. If either the Levene's test is significant ( $p < 0.01$ ) or Shapiro-Wilk's test is significant ( $p < 0.01$ ), normality and homogeneity of variances will be tested with a log transformation used on the data.

On the log transformed data, if Levene's test is not significant ( $p \geq 0.01$ ) and Shapiro-Wilk's test is not significant ( $p \geq 0.01$ ), then a log normal distribution will be used. If either the Levene's test is significant ( $p < 0.01$ ) or Shapiro-Wilk's test is significant ( $p < 0.01$ ), then a rank transformation will be used on the data.

#### **Raw or Log Transformed data:**

A one way analysis of variance will be used to test each endpoint for the effects of treatment.<sup>9</sup>

If the treatment effect is significant ( $p < 0.05$ ), linear contrasts will be constructed for a Dunnett's pair-wise comparison of treatment groups as described above.

#### **Rank transformed data:**

A Kruskal-Wallis test will be used to test each endpoint for the effects of treatment.<sup>9</sup>

---

<sup>7</sup>Milliken GA, Johnson DE., Analysis of messy data. London: Chapman and Hall; 1992.

<sup>8</sup>Royston, J. P., "Approximating the Shapiro-Wilk W Test for Nonnormality." Statistics and Computing 2:117-119; 1992.

<sup>9</sup>Zar JH., Biostatistical analysis. 4th ed. New Jersey: Prentice Hall; 1999.

If the treatment effect is significant ( $p < 0.05$ ), a non-parametric Dunn's pair-wise comparison test of each treatment group with the control group.

Results of all pair-wise comparisons will be reported at the 0.05 and 0.01 significance levels. All endpoints will be analyzed using two-tailed tests unless indicated otherwise.

## 8. STUDY REPORTS

Progress/Study Updates: As Requested

Report Format: Comprehensive

Tabulated Summary: Unaudited tabulated summary will be compiled from the report, in accordance with ICH guidelines, for inclusion in the Common Technical Document (CTD).

Copies Issued: 1 Regulatory Compliant PDF

Electronic Data: Electronic datasets created following the Standard for Exchange of Nonclinical Data Implementation Guide (SENDIG)<sup>10</sup> will be provided after study finalization. When work in support of this study is conducted at a Test Site (*i.e.*, Bioanalysis, TK modeling, etc.), an electronic version of all data should be provided to Testing Facility. Failure to do so may result in lengthened SEND dataset completion timelines.

Special Considerations: A signed version of the pathology contributing scientist report (CSR) will be issued with or subsequent to the issuance of the audited draft report. Until the signed pathology CSR is issued, the unsigned pathology CSR will be marked 'Not Intended for Regulatory Submission' and will be listed on the Statement of Compliance in the audited draft report relating to the unsigned nature of this CSR. After the pathology CSR is signed, any subsequent revisions will be made in the form of an amended CSR, which will delineate the changes, as well as the reasons for those changes.

Six months after issuance of the draft report (overall report), if no requested revisions or instructions to finalize have been communicated by the Sponsor, the draft report may be issued as a final report, signed by the Study Director, and submitted to the Sponsor. Any modifications or

---

<sup>10</sup> Standard for Exchange of Nonclinical Data Implementation Guide: Nonclinical Studies, CDISC Standard for Exchange of Nonclinical Data Team.

changes to the draft report requested six months after issuance of the draft will be performed at additional cost to the Sponsor.

## 9. DATA AND SPECIMEN RETENTION

Materials: All raw data, documentation, records, protocol, specimens (or samples if archived), and the final report.

Storage Location: Testing Facility or an Testing Facility contracted archive facility.

Length of Retention: One year following issuance of the audited draft report.

Disposal: The Sponsor will be contacted annually by Testing Facility archive staff regarding the retained material and will be responsible for the incurred costs for the return, disposal, or continued storage of any study generated material retained after that time.

Special Considerations: Data generated at the Sponsor's designated lab will be retained by that facility for at least the period specified above.

It is the responsibility of the Sponsor to notify the Study Director of any data generated from tests outside of the scope of this protocol using samples/specimens shipped back to the Sponsor for possible inclusion into the final study report.

Data/specimens shipped to the Sponsor or Sponsor-designated location (excluding wet specimens obtained from blood, urine/feces and/or biological fluids), will be archived by the Sponsor.

## 10. APPROVAL

### 10.1. Sponsor Approval

24 February 2020  
Date of Sponsor Approval

### 10.2. Study Director Approval

|                                                                                                                                                                                                   |
|---------------------------------------------------------------------------------------------------------------------------------------------------------------------------------------------------|
| DocuSigned by:<br><i>Sarah Davis</i>                                                                                                                                                              |
|  Signer Name: Sarah Davis<br>Signing Reason: I approve this document<br>Signing Time: 25-Feb-2020   11:07:24 EST |
| CBB533787C4D4D21A7693D214BF98FA5                                                                                                                                                                  |

Study Director/Date

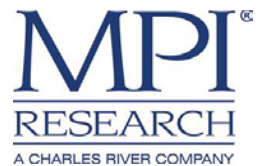

**FINAL PROTOCOL**

**Testing Facility Study No. 2759-001**

**Sponsor Reference No. CLN7-001**

**A Single Dose Toxicity Study of Test Article Administered by Intrathecal  
Injection in Rats**

**SPONSOR:**

Foundation for Batten Hope  
3963 Maple Ave., Suite 390  
Dallas, TX 75219  
USA

**TESTING FACILITY:**

MPI Research  
54943 North Main Street  
Mattawan, MI 49071  
USA

## TABLE OF CONTENTS

|                                                             |    |
|-------------------------------------------------------------|----|
| 1. INTRODUCTION .....                                       | 3  |
| 2. DOSE FORMULATION AND PREPARATION .....                   | 6  |
| 3. TEST SYSTEM.....                                         | 7  |
| 4. STUDY DESIGN .....                                       | 10 |
| 5. ANTEMORTEM STUDY EVALUATIONS .....                       | 11 |
| 6. ANIMAL DISPOSITION AND POSTMORTEM STUDY EVALUATIONS..... | 15 |
| 7. STATISTICS .....                                         | 22 |
| 8. STUDY REPORTS .....                                      | 24 |
| 9. DATA AND SPECIMEN RETENTION .....                        | 25 |
| 10. APPROVAL.....                                           | 27 |

## 1. INTRODUCTION

### 1.1. Study Objective

The objective of this study is to further characterize the toxicity, biodistribution, and gene expression of the test article. The test article is being developed for treatment of the neurodegenerative Batten Disease (CLN7 subtype).

### 1.2. Proposed Study Schedule

The following table contains proposed dates for study activities. Actual dates will be listed in the study report.

|                                                                                  |                                                           |
|----------------------------------------------------------------------------------|-----------------------------------------------------------|
| <u>Study Initiation Date:</u>                                                    | Date Study Director signs Study Approval in this protocol |
| <u>Experimental Start Date:</u><br><i>(First day of dosing)</i>                  | 14 September 2018                                         |
| <u>Experimental Termination Date:</u><br><i>(Last animal removed from study)</i> | 17 December 2018                                          |
| <u>Draft Report Mail Date:</u>                                                   | Approximately 10 weeks after final necropsy               |

### 1.3. Contact Information

|                                          |                                                                                                                      |
|------------------------------------------|----------------------------------------------------------------------------------------------------------------------|
| <u>Study Director:</u>                   | Sarah Davis, BS, LATG<br>Tel: 269-668-3336 ext. 1250<br>Fax: 269-668-4151<br>E-mail: sarah.davis@mpiresearch.com     |
| <u>Alternate Contact:</u>                | Scott T. Wilson, BS, LAT<br>Tel: 269-668-3336 ext. 1610<br>Fax: 269-668-4151<br>E-mail: scott.wilson@mpiresearch.com |
| <u>Sponsor Representative:</u>           | Gina Hann<br>Tel: 520-331-6283<br>E-mail: gina.hann@gmail.com                                                        |
| <u>Alternate Sponsor Representative:</u> | Steven Gray, PhD<br>Tel: 214-648-0670                                                                                |



E-mail: steven.gray@UTSouthwestern.edu

Principal Investigator Steven J Gray, PhD  
for Serum, CSF,  
qPCR, and RT-qPCR University of Texas Southwestern Medical Center - Gray Lab  
Sample Analysis: 6000 Harry Hines Blvd  
NA02.508  
Dallas, TX 75390  
Office: 214-648-0670  
Lab: 214-648-0671  
E-mail: steven.gray@UTSouthwestern.edu

Lead Quality Janis Kissel, BS, RQAP-GLP  
Assurance: Tel: 269-668-3336, ext. 3170  
Fax: 269-668-4151  
E-mail: janis.kissel@mpiresearch.com

#### 1.4. Regulatory Compliance, Animal Welfare Standards, and Study Guidelines

- Quality Assurance:
- Will assure compliance with the protocol, Testing Facility Standard Operating Procedures (SOPs) and the GLP regulations.
  - Will make available inspection records to the Sponsor Representatives during visits to Testing Facility.
- GLP Regulation:
- United States Food and Drug Administration (FDA) Good Laboratory Practice (GLP) Regulations, 21 Code of Federal Regulations (CFR) Part 58
  - Guide for the Care and Use of Laboratory Animals<sup>1</sup>
- Animal Welfare Standards:
- Current International Council for Harmonisation (ICH) Harmonised Tripartite Guidelines and generally accepted procedures for the testing of pharmaceutical compounds.<sup>2</sup>
- Guidelines:

#### 1.5. Alteration of Design

Changes to this approved protocol may be made as the study progresses, and all reasonable efforts will be made to discuss necessary changes, in advance, with the Sponsor. Due to the

---

<sup>1</sup> Guide for the Care and Use of Laboratory Animals. 8th ed., Washington, D.C., National Academies Press, 2011.

<sup>2</sup> Guidance on non-clinical safety studies for the conduct of human clinical trials and marketing authorization for pharmaceuticals. ICH M3(R2), 2009 June 11 (ICH Implementation Date).

urgent or temporary nature of some protocol changes, the Study Director may authorize a change using a Planned Event form. The form will describe the change, the rationale for the change, and the effective date (or date range, in the instance of a temporary modification) of the change. Such situations will be considered planned deviations until the protocol amendment is prepared and signed, when applicable. In the instance of temporary modifications where a permanent change to the protocol will not be made, the situation will be considered a planned deviation and no protocol amendment will be issued. Resulting protocol amendments will be signed and dated by the Study Director and will identify the date of Sponsor approval, either written or verbal. Signed protocols and protocol amendments will be issued to the Sponsor, including the Sponsor Representative(s), the Sponsor Monitor(s), and the Principal Investigator(s), in addition to other key contact personnel listed in the protocol, and appropriate Testing Facility personnel.

### 1.6. Proposed Computer Systems

The following are the proposed computer systems to be used during the conduct of this study and their primary function. The actual systems and versions used will be documented in the final report.

| Computer System Name      | Description                                                                                                                                                                               |
|---------------------------|-------------------------------------------------------------------------------------------------------------------------------------------------------------------------------------------|
| Logbook:                  | Electronic notebook and data collection system for veterinary communications, observations, and treatments.                                                                               |
| Testing Facility ExyLIMS: | A comprehensive laboratory information management system used to manage data, including but not limited to: instrumentation, test articles, standards, and samples.                       |
| NextDocs <sup>®</sup> :   | Electronic documentation management of Deviation Events and Corrective and Preventative Actions (CAPA).                                                                                   |
| Provantis <sup>™</sup> :  | Client-server, Oracle-based system used for electronic documentation and data management from compound receipt through reporting.                                                         |
| SAS <sup>®</sup> :        | An integrated system of software products that enables a user to perform data entry, retrieval, data management, reporting, graphics, statistical analysis, and applications development. |

| Computer System Name                                                     | Description                                                     |
|--------------------------------------------------------------------------|-----------------------------------------------------------------|
| Siemens Environmental Monitoring and Niagara Framework® Software System: | Environmental monitoring, alarming, and reporting applications. |

## 2. DOSE FORMULATION AND PREPARATION

### 2.1. Test Article and Vehicle Information

#### 2.1.1. Test Article Information

Test Article Name: scAAV9/JeT-hCLN7opt-SV40pA

Storage Conditions: Frozen (-60 to -90°C)

Description: A description, lot number, storage conditions, expiration date, safe handling procedures, physical properties, as well as other relevant information will be documented in the study data.

Characterization: The Sponsor will provide documentation on the strength, purity, composition, stability, and other pertinent information on each batch of test article, unless otherwise noted. Note, if the Sponsor does not supply the above information (e.g. certificate of analysis), this will be listed on the Statement of Compliance in the final report.

Reserve Sample: A reserve sample from each lot of test and control articles used in this study will be collected and stored at Testing Facility in a secure area with the appropriate environmental controls. If multiple studies are conducted with the same test article, a common reserve sample may be taken and labeled and stored appropriately.

Test Article Contact: Gina Hann  
Tel: 520-331-6283  
E-mail: gina.hann@gmail.com

Test Article Disposition: The Sponsor will be contacted for proper disposition of materials (retain/ship/discard) after completion of the in-life phase of the study, and following confirmation that these materials are not assigned to other studies.

### 2.1.2. Vehicle Information

Vehicle Name: Isotonic phosphate-buffered saline containing 5% w/v sorbitol (provided by the sponsor)

Storage Conditions: The vehicle will be stored frozen (-60 to -90°C) until initial use. Once thawed, the vehicle should be stored refrigerated (2 to 8°C) and used within 2 weeks.

Characterization: The Sponsor will provide documentation on the strength, purity, composition, stability, and other pertinent information on each batch of control article, unless otherwise noted. Note, if the Sponsor does not supply the above information (e.g. certificate of analysis), this will be listed as a GLP exception in the final report.

### 2.2. Dose Formulation Details

Preparation: Test article will be dispensed as instructed by the Sponsor. The high and middle doses will be used as supplied (without dilution). The low dose will be diluted 1:4 (i.e., 1 part test article and 3 parts vehicle) prior to injection.

Frequency: Dispensed on dosing days

Storage Conditions: Frozen (-60 to -90°C) until initial use. Once thawed, the test article should be stored refrigerated (2 to 8°C) and used within 2 weeks.

## 3. TEST SYSTEM

### 3.1. Test System Details

Species: Rat

Strain: CD<sup>®</sup> [CrI:CD<sup>®</sup>(SD)]

Source: Charles River Laboratories

### 3.2. Justification of Test System

The current state of scientific knowledge and the applicable guidelines cited previously in this protocol do not provide acceptable alternatives, *in vitro* or otherwise, to the use of live animals to accomplish the purpose of this study. “The development of knowledge necessary for the improvement of the health and well-being of humans as well as other animals requires *in vivo*

experimentation with a wide variety of animal species.”<sup>3</sup> “Whole animals are essential in research and testing because they best reflect the dynamic interactions between the various cells, tissues, and organs comprising the human body.”<sup>4</sup>

The rat is the usual rodent model<sup>5</sup> used for evaluating the toxicity of various classes of chemicals and for which there is a large historical database.

### 3.3. Test System Receipt

Expected Age at Arrival: Ordered to be eight weeks of age at administration

Expected Weight at Arrival: Commensurate with age; males will generally weigh 215 to 260g and females will generally weigh 165 to 210g, as measured within three days of arrival. The actual range will be documented in the data.

Number Ordered:

Male: 67

Female: 67

Number on Study:

Male: 60

Female: 60

Acclimation Duration: At least one week from initial receipt of animals to Testing Facility.

Acclimation Details: During this acclimation period, all animals will be observed daily for any clinical signs of disease, and all animals will be given a detailed clinical examination prior to selection for study.

### 3.4. Selection for Study

Body Weight Range:  $\pm 20\%$  of the mean body weight for each sex

---

<sup>3</sup> “Principles for the Utilization and Care of Vertebrate Animals Used in Testing, Research, and Training”, Federal Register, 1985 May 20; 50(97).

<sup>4</sup> “Position Statement on the Use of Animals in Research”, 1993 Feb 26; NIH Guide 22(8).

<sup>5</sup> Guidance for Industry, Investigators, and Reviewers: Exploratory IND Studies, U.S. F.D.A. Center for Drug Evaluation and Research (CDER), 2006 Jan.

Randomization: By sex, into treatment groups using a standard, by weight, randomization procedure.  
All animals with any evidence of disease or physical abnormalities will not be selected for study.

### 3.5. Method of Identification

Each animal will be assigned an animal number to be used in Provantis™ and will be implanted with a microchip bearing a unique identification number. The individual animal number, implant number, and the Testing Facility study number will comprise a unique identification for each animal. The animal cage will be identified by the study number, animal number, group number, and sex.

### 3.6. Husbandry

Housing: Pair-housed, when possible (animals may be housed two to three/cage during acclimation and in-life depending on study design)

Caging: Solid bottom cages with nonaromatic bedding. The bedding will be from an approved supplier and documented in the study data.

Temperature and Humidity: Temperature and humidity will be maintained according to Testing Facility SOP.

Lighting: Fluorescent lighting will be provided via an automatic timer for approximately 12 hours per day. On occasion, the dark cycle may be interrupted intermittently due to study-related activities.

Water: Tap water will be supplied *ad libitum* to all animals via an automatic water system unless otherwise indicated.

Diet: The basal diet will be block Lab Diet® Certified Rodent Diet #5002, PMI Nutrition International, Inc. This diet will be available *ad libitum* unless designated otherwise. Each lot number used will be identified in the study records.

Water and Diet Contaminants: There are no known contaminants in the food or water that would interfere with this study. The drinking water used will be monitored for specified contaminants at periodic intervals according to Testing Facility SOP.

Supplemental Enrichment: Animal enrichment will be provided according to Testing Facility SOP.

**4. STUDY DESIGN**

| Group                           | Treatment                         | Dose Level<br>(vg/animal) | Dose<br>Volume<br>( $\mu$ L) | Dose<br>Concentration<br>(vg/ $\mu$ L) | Number of Animals |    |                    |    |                    |    |
|---------------------------------|-----------------------------------|---------------------------|------------------------------|----------------------------------------|-------------------|----|--------------------|----|--------------------|----|
|                                 |                                   |                           |                              |                                        | Necropsy<br>Day 8 |    | Necropsy<br>Day 29 |    | Necropsy<br>Day 91 |    |
|                                 |                                   |                           |                              |                                        | M                 | F  | M                  | F  | M                  | F  |
| 1                               | Vehicle                           | 0                         | 60 $\mu$ L                   | 0                                      | 5                 | 5  | 5                  | 5  | 5                  | 5  |
| 2                               | Test<br>Article<br>Low Dose       | $5 \times 10^{11}$        | 20 $\mu$ L                   | $2.5 \times 10^{10}$                   | 5                 | 5  | 5                  | 5  | 5                  | 5  |
| 3                               | Test<br>Article<br>Middle<br>Dose | $2 \times 10^{12}$        | 20 $\mu$ L                   | $1 \times 10^{11}$                     | 5                 | 5  | 5                  | 5  | 5                  | 5  |
| 4                               | Test<br>Article<br>High Dose      | $6 \times 10^{12}$        | 60 $\mu$ L                   | $1 \times 10^{11}$                     | 5                 | 5  | 5                  | 5  | 5                  | 5  |
| <b>Total Number of Animals:</b> |                                   |                           |                              |                                        | 20                | 20 | 20                 | 20 | 20                 | 20 |

**4.1. Justification of Dose Levels**

The dose level was selected by the Sponsor, or in consultation with the Sponsor, on the basis of available data from previous studies and discussion with the FDA in a preIND meeting. The low and middle doses have been tolerated well in pilot mouse studies, and the middle dose is the target dose to model the proposed clinical dose in CLN7 patients. The middle dose has shown sufficient to improve pathological signatures of the disease in mice. Per the discussion with the FDA, we were advised to bracket the “middle” target dose with lower and higher doses to complete the dose-responsive nature of any effect.

**4.2. Administration**

Route: Intrathecal (IT) injection

Frequency/Duration: The test article and vehicle will be administered once on Day 1.

Details: Animals will be anesthetized with Isoflurane and placed in a ventral recumbency and the lumbar cistern will be accessed via a percutaneous needle stick. The location of the needle may be verified using fluoroscopy. Once the needle is in place, the test article will be injected and the needle removed. Animals will then be allowed to recover. The test article will be left at room temperature for 15 to 30 minutes prior to dosing but no more than 2 hours.

**4.3. Justification for Route of Administration**

Intrathecal injection is the intended route of administration of this test article in humans.

## 5. ANTEMORTEM STUDY EVALUATIONS

### 5.1. Cageside Observations

Frequency: At least twice daily

Details: Animals will be observed for morbidity, mortality, injury, and availability of food and water. Any animals in poor health will be identified for further monitoring and possible euthanasia.

### 5.2. Detailed Clinical Observations

Frequency: Weekly

Details: Observations will include, but will not be limited to, evaluation of the skin, fur, eyes, ears, nose, oral cavity, thorax, abdomen, external genitalia, limbs and feet, respiratory and circulatory effects, autonomic effects such as salivation, nervous system effects including tremors, convulsions, reactivity to handling, unusual behavior.

### 5.3. Body Weight

Frequency: Within three days of arrival, at least once prior to randomization and/or Day -1, and once weekly thereafter.

### 5.4. Food Consumption

Frequency: Weekly

### 5.5. Fusion v6 Rotating Rod System

Frequency: Animals scheduled for Day 29 and Day 91 necropsy only: predose and prior to necropsy.

Details: The apparatus is set to accelerate from -4 rpm to -40 rpm (the negative sign indicates direction, in this case it means the animal will ambulate away from the observer) over the course of 3 minutes. This indicates that the rod will be accelerating at a rate of 0.2 revolutions per second. The elapsed time from the start of the trial to the animal's fall and the speed of the rod at the time of the fall is recorded digitally by the instrument. Each animal will perform 3 consecutive trials with at least 15 minutes between trials. The average of all 3 trials will be reported for each animal.

The morning of each testing a training session will be conducted. The training session will consist of the animal being placed on a rotating rod



which is set to a constant speed of -4 rpm for 3 minutes. Animals that fall off during training are immediately placed back on the rotating rod until the 3 minutes is completed. Data from the training sessions will not be reported.

The computer software is not validated and this will be listed as a GLP exception in the final report.

**5.6. Clinical Pathology Sample Collection and Analysis**

Fasting Requirements: Free access to drinking water but fasted overnight prior to blood collection.

Blood Sample Volume: Hematology: 0.5 to 1mL  
 Coagulation: 1.2mL  
 Clinical Chemistry: 0.8 to 1.3mL

Site of Blood Sample Collection: Vena cava after carbon dioxide inhalation

Anticoagulant: Hematology: K<sub>2</sub>EDTA  
 Coagulation: Sodium Citrate  
 Clinical Chemistry: Serum Separator

Sample Disposition: All samples will be disposed of per Testing Facility SOP.

The following clinical pathology tests will be conducted on available samples and as survival allows.

| Sample Type | Number of Animals | Intervals   | Parameters Evaluated                                                                                                                                                                                                                                                                                                                                                                                                         |
|-------------|-------------------|-------------|------------------------------------------------------------------------------------------------------------------------------------------------------------------------------------------------------------------------------------------------------------------------------------------------------------------------------------------------------------------------------------------------------------------------------|
| Hematology  | All               | Termination | <ul style="list-style-type: none"> <li>• leukocyte count (total and absolute differential)</li> <li>• erythrocyte count</li> <li>• hemoglobin</li> <li>• hematocrit</li> <li>• mean corpuscular hemoglobin, mean corpuscular volume, mean corpuscular hemoglobin concentration (calculated)</li> <li>• absolute reticulocytes</li> <li>• platelet count</li> <li>• RDW</li> <li>• blood smear preserve and stain*</li> </ul> |

| Sample Type               | Number of Animals | Intervals   | Parameters Evaluated                                                                                                                                                                                                                                                                                                                                                                                                                                                                                                                                                                                    |
|---------------------------|-------------------|-------------|---------------------------------------------------------------------------------------------------------------------------------------------------------------------------------------------------------------------------------------------------------------------------------------------------------------------------------------------------------------------------------------------------------------------------------------------------------------------------------------------------------------------------------------------------------------------------------------------------------|
|                           |                   |             | *blood smear review may be performed on select animals per Testing Facility SOP.                                                                                                                                                                                                                                                                                                                                                                                                                                                                                                                        |
| <b>Coagulation</b>        | All               | Termination | <ul style="list-style-type: none"> <li>• prothrombin time</li> <li>• activated partial thromboplastin time</li> <li>• fibrinogen</li> </ul>                                                                                                                                                                                                                                                                                                                                                                                                                                                             |
| <b>Clinical Chemistry</b> | All               | Termination | <ul style="list-style-type: none"> <li>• alkaline phosphatase</li> <li>• total bilirubin (with direct bilirubin if total bilirubin exceeds 1 mg/dL)</li> <li>• aspartate aminotransferase</li> <li>• alanine aminotransferase</li> <li>• urea nitrogen</li> <li>• creatinine</li> <li>• total protein</li> <li>• albumin</li> <li>• globulin and A/G (albumin/globulin) ratio (calculated)</li> <li>• glucose</li> <li>• total cholesterol</li> <li>• triglycerides</li> <li>• electrolytes (sodium, potassium, chloride)</li> <li>• calcium</li> <li>• phosphorus</li> <li>• sample quality</li> </ul> |

## 5.7. Serum Sample Collection and Analysis

### 5.7.1. Sample Collection

| Group(s) | Animals/Sex/Interval | Interval    |
|----------|----------------------|-------------|
| All      | All                  | Termination |

Fasting Requirements: The animals will not be fasted before blood collection unless concurrent with fasting for other procedures.

Collection Site: Vena cava after carbon dioxide inhalation

Whole Blood Volume/Sample: Blood: 0.6 to 1 mL

Anticoagulant: Serum separator

Whole Blood Storage: Room Temperature

Additional Container Label Requirements: Testing Facility study number, relative study day, animal number, and the date and time interval of collection.

Sample Requirements: Serum: 3 aliquots, 100  $\mu$ L each. If the total volume of serum is less than 300  $\mu$ L, then lower equal aliquots are acceptable.

Special Requirements: The serum may be initially stored on dry ice.

Final Storage Temperature: Processed samples will be placed on dry ice or in frozen (-60 to -90°C) storage within 60 minutes of centrifugation.

## 5.7.2. Sample Handling and Analysis

### 5.7.2.1. Sample Handling

Shipping Conditions: Frozen on dry ice

Primary Contact for Sample Shipment: Erik Lykken  
Attn: Gray Lab  
6000 Harry Hines Blvd  
NA02.508  
University of Texas Southwestern Medical Center  
Dallas, TX 75390  
Tel: 214-648-0671  
E-mail: Erik.Lykke@UTSouthwestern.edu

Shipping Details: Samples will be shipped on Monday through Wednesday for next day delivery. The primary contact will be notified prior to each shipment.

### 5.7.2.2. Serum Analysis

Analysis Performed by: The analytical work will be conducted by a Sponsor-contracted laboratory, the Laboratory of Dr. Steven Gray, using an analytical method to be added by amendment if sample analysis is conducted. Samples may be retained for possible future analysis.

Regulatory Requirements: The work performed in conjunction with this study will not be conducted in compliance with GLPs. A final report will be prepared and submitted to the Sponsor and Test Facility for inclusion as an appendix in the main study final report., if sample analysis is conducted.

Sample Disposition: Following analysis, any residual samples or backup samples will be retained by the Test Facility (The Laboratory of Dr. Steven Gray) as per their respective SOPs. Any unshipped back up samples remaining at Testing Facility will be archived by Testing Facility.

## 6. ANIMAL DISPOSITION AND POSTMORTEM STUDY EVALUATIONS

### 6.1. Animal Disposition

Moribundity: Moribund animals will be subject to Testing Facility SOP criteria and procedures. If possible, the samples below will be collected from animals euthanized *in extremis*, following veterinary consultation. A veterinary consultation is not required if the samples are collected following anesthesia or euthanasia. Blood collection methods utilized for animals euthanized *in extremis* may include suitable methods other than those presented in the respective blood collection section(s) of this protocol.

| Sample Type        | Groups | Volume | Anticoagulant       |
|--------------------|--------|--------|---------------------|
| Hematology         | All    | 1mL    | K <sub>2</sub> EDTA |
| Coagulation        |        | 1.2mL  | Citrate             |
| Clinical Chemistry |        | 1.3mL  | Serum Separator     |
| Serum              | All    |        |                     |
| CSF                | All    |        |                     |

Necropsy examinations will be performed seven days a week. Animals that are found dead or euthanized *in extremis* after regular working hours will be refrigerated overnight and necropsies performed at the start of the next day. Any animal found dead or euthanized *in extremis* will undergo a gross necropsy examination and macroscopic observations will be recorded. Protocol designated tissues will be saved from these animals.

Method of Euthanasia: Euthanasia will be by carbon dioxide inhalation followed by an Testing Facility SOP approved method to ensure death, e.g. exsanguination.

Disposition of Animals Not Assigned: Extra animals obtained for this study, but not placed on study, will be either transferred to a Testing Facility stock or training colony, or euthanized and discarded. The final disposition of each animal will be documented in the study records.

Disposition of Study Animals: All main study animals will be euthanized and subjected to a complete necropsy examination, performed under procedures approved by a veterinary pathologist in accordance with Testing Facility SOP.

## 6.2. Postmortem Evaluations

Necropsy Schedule: Terminal: Day 8, Day 29, and Day 91

External Evaluations: The animals will be examined carefully for external abnormalities including palpable masses.

Macroscopic Evaluations: The skin will be reflected from a ventral midline incision, and any subcutaneous masses will be identified and correlated with antemortem findings. The abdominal, thoracic, and cranial cavities will be examined for abnormalities and the organs removed, examined, and, where required, placed in the appropriate fixative.

Tissue Fixation: All tissues will be placed in a neutral buffered formalin, except that the eyes, including the optic nerves, and testes will be fixed using a modified Davidson's fixative<sup>6</sup>. Eyes and testes will be placed into formalin after fixation. Formalin will be infused into the lung via the trachea and into the urinary bladder.

Organ Weights: Body weight and the organ weights identified in the organ list table will be recorded for all animals at the scheduled necropsies, and appropriate organ weight ratios will be calculated (relative to body and brain weights). Paired organs will be weighed together. Organs will not be weighed for animals found dead or euthanized *in extremis*.  
  
A combined weight of the thyroid gland with parathyroid glands will be obtained, and the right mandibular/sublingual salivary glands will be weighed together. The thyroid/parathyroid gland and pituitary gland will be weighed following fixation.

Microscopic Evaluation: Microscopic examination of fixed hematoxylin and eosin-stained paraffin sections will be performed on sections of tissues and from the groups and/or intervals identified in the following table and all animals found dead or euthanized *in extremis*.

Handling of Specific Tissues: Bone marrow smears will not be prepared for animals found dead but will be prepared for animals euthanized *in extremis* (with the exception of euthanized animals requiring refrigeration prior to necropsy).

---

<sup>6</sup> Latendresse JR, Warbritton AR, Jonassen H, Creasy DM. Fixation of testes and eyes using a modified Davidson's fluid: comparison with Bouin's fluid and conventional Davidson's fluid. Toxicol Pathol. 2002 Jul Aug;30(4):524-33.

The spinal cord and DRG (cervical, lumbar, thoracic) will be collected in situ. The samples will be decalcified and embedded in paraffin with cross-sections that include the spinal cord, nerve roots, and DRG.

Additional Testing: Evaluation of the bone marrow smears will be performed at the discretion of the Study Director and/or Sponsor.

The pathologist may use special stains and techniques as needed to aid in the diagnosis of specific lesions. If after routine sectioning, a tissue is missed, one recut will be requested either by re-sectioning the tissue in the block or ordering a wet tissue recut. If the tissue is still missing, the block will not be re-sectioned unless the missing tissue is determined to be a potential target organ. In this case, the tissue will be re-sectioned until located or until it is determined that it is not present in the block or in wet tissue. Non-protocol-required tissues that are coincidentally within the plane of a protocol-required tissue will be examined by the study pathologist, and any findings that impact the interpretation of the study will be documented. In some instances, tissues may be collected and processed to paraffin block or glass slide stage prior to defining the tissues required for microscopic examination (e.g., intermediate and/or recovery groups). In these cases, only protocol-required tissues will be examined microscopically and other tissues present on the slide will not be examined.

Digital images for illustrative purposes may be taken. These images will not be used for data generation or interpretation, and will not be archived or included in the final report.

Pathology Evaluation: In the unlikely event that an Testing Facility pathologist cannot be scheduled for the pathology evaluation due to logistics/timing, the pathology evaluation may be outsourced (by protocol amendment) to an external ACVP-certified veterinary pathologist.

### **6.3. qPCR and RT-qPCR Sample Collection and Analysis**

qPCR Sample Collection: Each organ/tissue sample will be divided in half; one part used for DNA purification and the other part used for RNA purification. When possible, duplicate samples will be collected (4 total per tissue/organ) as long as each sample is  $\geq 10$  mg.

Samples of the organs or tissues collected for qPCR will be placed in labeled 2-mL microfuge tubes (one tube/sample), snap-frozen into liquid nitrogen, and then stored at  $-60^{\circ}\text{C}$  to  $-90^{\circ}\text{C}$  until shipped to the Sponsor designated laboratory for analysis. Samples collected for RT-qPCR analysis of the transgene mRNA will be completely immersed

into labeled 2 mL microfuge tubes prefilled with 1.5 mL RNALater. Samples will be stored refrigerated (2 to 8°C) for up to 24 hours and then stored frozen (-60 to -90°C) with the RNALater removed until shipped to the Sponsor designated laboratory for analysis.

The samples for DNA analysis will be collected using strict aseptic techniques and disposable instruments for each tissue or organ. Care will be given to ensure that cross contamination between tissues does not occur. Gloves will be changed between collection and dissection of each tissue for PCR analysis. In addition, non-disposable instruments will be wiped down with a 10% bleach solution, rinsed with water followed by a wipe down of 100% ethanol between groups. The cutting board will be wiped down with a 10% bleach solution, rinsed with water followed by a wipe down of 100% ethanol between each of the specified organs or sterile trays may be used. The tissues for PCR analysis will be collected prior to sample collection for any other parameters. Samples for qPCR and RT-qPCR will not be collected for animals found dead or euthanized *in extremis*.

qPCR and RT-qPCR If deemed necessary by the sponsor, qPCR and/or RT-qPCR analysis  
Sample analysis: will be conducted. Purified DNA will be used as template for qPCR to detect the transgene in each sample relative to a genomic DNA reference, with a sensitivity of  $\leq 50$  copies of vector DNA per microgram of rat genomic DNA. Purified RNA will be used for cDNA synthesis, and the cDNA of the optimized human CLN7 will be quantified relative to endogenous rat GAPDH cDNA and rat CLN7 cDNA levels. Only tissues found positive for vector presence at  $\geq 50$  double-stranded copy of vector DNA per 1  $\mu\text{g}$  rat DNA will be tested for gene expression by RNA analysis.

### 6.3.1. Sample Handling and Analysis

#### 6.3.1.1. Sample Handling

Shipping Conditions: Frozen on dry ice

Primary Contact for Erik Lykken

Sample Shipment: Attn: Gray Lab

6000 Harry Hines Blvd

NA02.508

University of Texas Southwestern Medical Center

Dallas, TX 75390

Tel: 214-648-0671

E-mail: [Erik.Lykken@UTSouthwestern.edu](mailto:Erik.Lykken@UTSouthwestern.edu)

Shipping Details: Samples will be shipped on Monday through Wednesday for next day delivery. The primary contact will be notified prior to each shipment.

### 6.3.1.2. qPCR and RT-qPCR Sample Analysis

Analysis Performed by: If needed, the analytical work will be conducted by a Sponsor-contracted laboratory, the Laboratory of Dr. Steven Gray, using an analytical method to be added by amendment if sample analysis is conducted. Samples may be retained for possible future analysis.

Regulatory Requirements: The work performed in conjunction with this study will not be conducted in compliance with GLPs. A final report will be prepared and submitted to the Sponsor and Test Facility for inclusion as an appendix in the main study final report, if sample analysis is conducted.

Sample Disposition: Following analysis, any residual samples or backup samples will be retained by the Test Facility (The Laboratory of Dr. Steven Gray) as per their respective SOPs. Any unshipped back up samples remaining at Testing Facility will be archived by Testing Facility.

### 6.4. Organs or Tissues to be Weighed, Preserved, and Microscopically Examined

| Organ                                                                                                            | Weigh | Collect at Necropsy | Histology Processing | Histopathology Evaluation Groups <sup>2</sup><br>All Groups | Biodistribution/Gene Expression<br>All Groups |
|------------------------------------------------------------------------------------------------------------------|-------|---------------------|----------------------|-------------------------------------------------------------|-----------------------------------------------|
| Animal ID                                                                                                        | -     | X                   | -                    | -                                                           |                                               |
| Artery, aorta                                                                                                    | -     | X                   | -                    | -                                                           |                                               |
| Body cavity, nasal                                                                                               | -     | X                   | -                    | -                                                           |                                               |
| Bone marrow                                                                                                      | -     | X                   | -                    | -                                                           |                                               |
| Bone marrow smear                                                                                                | -     | X <sup>1</sup>      | -                    | -                                                           |                                               |
| Bone, femur (one)                                                                                                | -     | X                   | -                    | -                                                           |                                               |
| Bone, sternum                                                                                                    | -     | X                   | -                    | -                                                           |                                               |
| Brain- at least 3 coronal cross sections (hindbrain including brainstem and cerebellum, midbrain, and forebrain) | X     | X                   | X                    | X                                                           | X                                             |
| Cervix                                                                                                           | -     | X                   | -                    | -                                                           |                                               |
| Epididymis (both)                                                                                                | X     | X                   | -                    | -                                                           |                                               |
| Esophagus                                                                                                        | -     | X                   | -                    | -                                                           |                                               |
| Eye (both)                                                                                                       | -     | X                   | -                    | -                                                           |                                               |
| Gland, adrenal (both)                                                                                            | X     | X                   | -                    | -                                                           |                                               |
| Gland, clitoral (both)                                                                                           | -     | X                   | -                    | -                                                           |                                               |



| <b>Organ</b>                                       | <b>Weigh</b>                                    | <b>Collect at Necropsy</b>                   | <b>Histology Processing</b> | <b>Histopathology Evaluation Groups<sup>2</sup><br/>All Groups</b> | <b>Biodistribution/Gene Expression<br/>All Groups</b> |
|----------------------------------------------------|-------------------------------------------------|----------------------------------------------|-----------------------------|--------------------------------------------------------------------|-------------------------------------------------------|
| Gland, lacrimal (both, extra-orbital)              | -                                               | X                                            | -                           | -                                                                  |                                                       |
| Gland, Harderian                                   | -                                               | X (both)                                     | -                           | -                                                                  |                                                       |
| Gland, mammary                                     | -                                               | X                                            | -                           | -                                                                  |                                                       |
| Gland, parathyroid (both)                          | -                                               | X                                            | -                           | -                                                                  |                                                       |
| Gland, pituitary                                   | X                                               | X                                            | -                           | -                                                                  |                                                       |
| Gland, preputial (both)                            | -                                               | X                                            | -                           | -                                                                  |                                                       |
| Gland, prostate                                    | X                                               | X                                            | -                           | -                                                                  |                                                       |
| Gland, salivary                                    | X (right mandibular/sublingual salivary glands) | X (both sub-mandibular, sublingual, parotid) | -                           | -                                                                  |                                                       |
| Gland, seminal vesicle (both)                      | -                                               | X                                            | -                           | -                                                                  |                                                       |
| Gland, thyroid (both)                              | X                                               | X                                            | -                           | -                                                                  |                                                       |
| Gland, Zymbal's (both)                             | -                                               | X                                            | -                           | -                                                                  |                                                       |
| Gut-associated lymphoid tissue                     | -                                               | X                                            | -                           | -                                                                  |                                                       |
| Heart                                              | X                                               | X                                            | X                           | X                                                                  | X                                                     |
| Joint, femorotibial (one)                          | -                                               | X                                            | -                           | -                                                                  | -                                                     |
| Kidney (both)                                      | X                                               | X                                            | X                           | X                                                                  | X                                                     |
| Large intestine, cecum                             | -                                               | X                                            | -                           | -                                                                  | -                                                     |
| Large intestine, colon                             | -                                               | X                                            | -                           | -                                                                  | -                                                     |
| Large intestine, rectum                            | -                                               | X                                            | -                           | -                                                                  | -                                                     |
| Larynx                                             | -                                               | X                                            | -                           | -                                                                  | -                                                     |
| Liver                                              | X                                               | X                                            | X                           | X                                                                  | X                                                     |
| Lung                                               | X                                               | X                                            | X                           | X                                                                  | X                                                     |
| Lymph node, mandibular                             | -                                               | X (both)                                     | X (one)                     | X (one)                                                            | X                                                     |
| Lymph node, mesenteric                             | -                                               | X                                            | X                           | X                                                                  | X                                                     |
| Macroscopic abnormalities                          | -                                               | X                                            | X                           | X                                                                  | -                                                     |
| Muscle, skeletal (bicep femoris and gastrocnemius) | -                                               | X                                            | X                           | X                                                                  | X                                                     |
| Nasopharynx                                        | -                                               | X                                            | -                           | -                                                                  | -                                                     |
| Nerve, optic (both)                                | -                                               | X                                            | -                           | -                                                                  | -                                                     |
| Nerve, sciatic                                     | -                                               | X (both)                                     | -                           | -                                                                  | -                                                     |
| Ovary (both)                                       | X                                               | X                                            | X                           | X                                                                  | X                                                     |
| Oviduct (both)                                     | X                                               | X                                            | -                           | -                                                                  | -                                                     |
| Pancreas                                           | -                                               | X                                            | -                           | -                                                                  | -                                                     |
| Skin                                               | -                                               | X                                            | -                           | -                                                                  | -                                                     |
| Small intestine, duodenum                          | -                                               | X                                            | -                           | -                                                                  | -                                                     |
| Small intestine, ileum                             | -                                               | X                                            | -                           | -                                                                  | -                                                     |
| Small intestine, jejunum                           | -                                               | X                                            | -                           | -                                                                  | -                                                     |

| Organ                                                  | Weigh | Collect at Necropsy | Histology Processing | Histopathology Evaluation Groups <sup>2</sup><br>All Groups | Biodistribution/Gene Expression<br>All Groups |
|--------------------------------------------------------|-------|---------------------|----------------------|-------------------------------------------------------------|-----------------------------------------------|
| Spinal cord, cervical (to include DRG and nerve roots) | -     | X                   | X                    | X                                                           | X                                             |
| Spinal cord, thoracic (to include DRG and nerve roots) | -     | X                   | X                    | X                                                           | X                                             |
| Spinal cord, lumbar (to include DRG and nerve roots)   | -     | X                   | X                    | X                                                           | X                                             |
| Spleen                                                 | X     | X                   | X                    | X                                                           | -                                             |
| Stomach                                                | -     | X                   | -                    | -                                                           | -                                             |
| Testis (both)                                          | X     | X                   | X                    | X                                                           | X                                             |
| Thymus                                                 | X     | X                   | -                    | -                                                           | -                                             |
| Tongue                                                 | -     | X                   | -                    | -                                                           | -                                             |
| Trachea                                                | -     | X                   | -                    | -                                                           | -                                             |
| Ureter (both)                                          | -     | X                   | -                    | -                                                           | -                                             |
| Urinary bladder                                        | -     | X                   | -                    | -                                                           | -                                             |
| Uterus                                                 | X     | X                   | -                    | -                                                           | -                                             |
| Vagina                                                 | -     | X                   | -                    | -                                                           | -                                             |

X = Procedure to be conducted; - = Not applicable.

<sup>1</sup> Two bone marrow smears will be collected from the femur at scheduled and unscheduled necropsies (for possible examination). Smears will not be collected from animals that are found dead or from animals that were euthanized moribund and then stored in the refrigerator prior to necropsy. Bone marrow smears are allowed to air dry and are not fixed in formalin.

<sup>2</sup> At the discretion of the Study Pathologist, findings for extraneous tissues (non-protocol tissues that may be present on a slide as a result of collection of protocol tissues) will also be recorded when observed.

## 6.5. Cerebrospinal Fluid (CSF) Sample Collection and Analysis

### 6.5.1. Sample Collection

Frequency: All animals at termination and animals euthanized *in extremis*

CSF Volume/Sample: Max attainable

Anticoagulant: None

Additional Container Label Requirements: Testing Facility study number, relative study day, animal number, and the date and time interval of collection.

Sample Requirements: 2 approximately equal aliquots

Final Storage Temperature: Frozen (-60 to -90°C)

## 6.5.2. Sample Handling and Analysis

### 6.5.2.1. Sample Handling

Shipping Conditions: Frozen on dry ice

Primary Contact for Sample Shipment: Erik Lykken, PhD  
Attn: Gray Lab  
6000 Harry Hines Blvd  
NA02.508  
University of Texas Southwestern Medical Center  
Dallas, TX 75390  
Tel: 214-648-0671  
E-mail: [Erik.Lykken@UTSouthwestern.edu](mailto:Erik.Lykken@UTSouthwestern.edu)

Shipping Details: Samples will be shipped on Monday through Wednesday for next day delivery. The primary contact will be notified prior to each shipment.

### 6.5.2.2. CSF Analysis

Analysis Performed by: If needed, the analytical work will be conducted by a Sponsor-contracted laboratory, the Laboratory of Dr. Steven Gray, using an analytical method to be added by amendment if sample analysis is conducted. Samples may be retained for possible future analysis.

Regulatory Requirements: The work performed in conjunction with this study will not be conducted in compliance with GLPs. A final report will be prepared and submitted to the Sponsor and Test Facility for inclusion as an appendix in the main study final report, if sample analysis is conducted.

Sample Disposition: Following analysis, any residual samples or backup samples will be retained by the Test Facility (The Laboratory of Dr. Steven Gray) as per their respective SOPs. Any unshipped back up samples remaining at Testing Facility will be archived by Testing Facility.

## 7. STATISTICS

The following presents a proposed statistical analysis plan. Statistical plans are data dependent, and this analysis plan may require modification if standard data assumptions are not met. Other conceptually equivalent statistical testing routines may also be employed at the discretion of the statistician. The actual analysis plan will be documented in the final report.

The raw data will be tabulated within each time interval, and the appropriate summary statistics will be calculated for each endpoint, sex, and group. For each endpoint, treatment groups will be compared to the control group using the analysis outlined below. Data for some endpoints, as indicated, will be transformed by either a log or rank transformation prior to conducting the specified analysis.

### 7.1. Statistical Comparisons

| Control Group | Comparison Group(s) |
|---------------|---------------------|
| 1             | 2, 3, 4             |

### 7.2. Group Pair-wise Comparison (General ANOVA)

Endpoints:

- Body Weight and Body Weight Change
- Food Consumption
- Hematology
- Coagulation
- Clinical Chemistry
- Organ Weights
  - Absolute Weights
  - Relative to Body and Brain Weights
- Urinalysis
  - Urine Volume
  - Specific Gravity
  - pH

Description:

The experimental unit for the analysis of food consumption will be cage, while for all other endpoints the experimental unit will be the individual animal. Food consumption will be calculated as described in Testing Facility SOP.

If the control group has a sample size less than three, no inferential statistics will be calculated. If a particular endpoint and/or parameter within a given collection interval have the same value across all experimental units, no inferential statistics will be calculated.

Otherwise, for endpoints and/or parameters where all groups with sample sizes of three or greater are included, the system will test the normality of the residuals and homogeneity of variances to see whether the data is approximately normal or whether a log transformation or rank transformation should be used. Levene's test<sup>7</sup> will be used to assess

---

<sup>7</sup>Milliken GA, Johnson DE., Analysis of messy data. London: Chapman and Hall; 1992.

homogeneity of group variances and Shapiro-Wilk's<sup>8</sup> test will be used to test the normality of the residuals.

On the raw data, if Levene's test is not significant ( $p \geq 0.01$ ) and Shapiro-Wilk's test is not significant ( $p \geq 0.01$ ), then a normal distribution will be used. If either the Levene's test is significant ( $p < 0.01$ ) or Shapiro-Wilk's test is significant ( $p < 0.01$ ), normality and homogeneity of variances will be tested with a log transformation used on the data.

On the log transformed data, if Levene's test is not significant ( $p \geq 0.01$ ) and Shapiro-Wilk's test is not significant ( $p \geq 0.01$ ), then a log normal distribution will be used. If either the Levene's test is significant ( $p < 0.01$ ) or Shapiro-Wilk's test is significant ( $p < 0.01$ ), then a rank transformation will be used on the data.

**Raw or Log Transformed data:**

A one way analysis of variance will be used to test each endpoint for the effects of treatment.<sup>9</sup>

If the treatment effect is significant ( $p < 0.05$ ), linear contrasts will be constructed for a Dunnett's pair-wise comparison of treatment groups as described above.

**Rank transformed data:**

A Kruskal-Wallis test will be used to test each endpoint for the effects of treatment.<sup>9</sup>

If the treatment effect is significant ( $p < 0.05$ ), a non-parametric Dunn's pair-wise comparison test of each treatment group with the control group.

Results of all pair-wise comparisons will be reported at the 0.05 and 0.01 significance levels. All endpoints will be analyzed using two-tailed tests unless indicated otherwise.

## 8. STUDY REPORTS

Progress/Study      As Requested  
Updates:

Terminal (Overall)      Unaudited report followed by Audited report  
Report:

<sup>8</sup>Royston, J. P., "Approximating the Shapiro-Wilk W Test for Nonnormality." Statistics and Computing 2:117-119; 1992.

<sup>9</sup>Zar JH., Biostatistical analysis. 4th ed. New Jersey: Prentice Hall; 1999.

Report Format: Comprehensive

Tabulated Summary: Unaudited tabulated summary will be compiled from the report, in accordance with ICH guidelines, for inclusion in the Common Technical Document (CTD).

Copies Issued: 1 Regulatory Compliant PDF

Electronic Data: Electronic datasets created following the Standard for Exchange of Nonclinical Data Implementation Guide (SENDIG)<sup>10</sup> will be provided after study finalization. When work in support of this study is conducted at a Test Site (*i.e.*, Bioanalysis, TK modeling, etc.), an electronic version of all data should be provided to Testing Facility. Failure to do so may result in lengthened SEND dataset completion timelines.

Special Considerations: A signed version of the pathology contributing scientist report (CSR) will be issued with or subsequent to the issuance of the audited draft report. Until the signed pathology CSR is issued, the unsigned pathology CSR will be marked 'Not Intended for Regulatory Submission' and will be listed on the Statement of Compliance in the audited draft report relating to the unsigned nature of this CSR. After the pathology CSR is signed, any subsequent revisions will be made in the form of an amended CSR, which will delineate the changes, as well as the reasons for those changes.

Six months after issuance of the draft report (overall report), if no requested revisions or instructions to finalize have been communicated by the Sponsor, the draft report may be issued as a final report, signed by the Study Director, and submitted to the Sponsor. Any modifications or changes to the draft report requested six months after issuance of the draft will be performed at additional cost to the Sponsor.

## 9. DATA AND SPECIMEN RETENTION

Materials: All raw data, documentation, records, protocol, specimens (or samples if archived), and the final report.

Storage Location: Testing Facility or an Testing Facility contracted archive facility.

Length of Retention: One year following issuance of the audited draft report.

---

<sup>10</sup> Standard for Exchange of Nonclinical Data Implementation Guide: Nonclinical Studies, CDISC Standard for Exchange of Nonclinical Data Team.

Disposal: The Sponsor will be contacted annually by Testing Facility archive staff regarding the retained material and will be responsible for the incurred costs for the return, disposal, or continued storage of any study generated material retained after that time.

Special Considerations: Data generated at the Sponsor's designated lab will be retained by that facility for at least the period specified above.

It is the responsibility of the Sponsor to notify the Study Director of any data generated from tests outside of the scope of this protocol using samples/specimens shipped back to the Sponsor for possible inclusion into the final study report.

Data/specimens shipped to the Sponsor or Sponsor-designated location (excluding wet specimens obtained from blood, urine/feces and/or biological fluids), will be archived by the Sponsor.

**10. APPROVAL**

**10.1. Sponsor Approval**

6 September 2018  
Date of Sponsor Approval

**10.2. Study Director Approval**

  
\_\_\_\_\_  
Sarah Davis, BS, LATG  
Study Director

07SEP2018  
Date

**10.3. Testing Facility Management Approval**

  
\_\_\_\_\_  
Mark Johnson, MS  
Senior Director, Surgery

7 Sept 2018  
Date



## DEVIATIONS

All deviations that occurred during the study have been authorized/acknowledged by the Study Director, assessed for impact, and documented in the study records. All study plan deviations are listed below.

None of the deviations were considered to have impacted the overall integrity of the study or the interpretation of the study results and conclusions.

The following planned deviations occurred as the result of an intended study modifications.

### Postmortem and Pathology

- At the time of trimming, the spinal cord was opened up to remove bilateral DRG's (to include nerve roots, when possible) from the cervical, thoracic, and lumbar regions of the spinal column. The DRG's were each be submitted for processing in individual tissue cassettes and left and right orientation maintained. Spinal cord sections adjacent to the harvested DRG's were trimmed and submitted for processing.

The following unplanned deviations occurred as the result of an unintended study modifications.

### In-Life Observations, Measurements, and Evaluations

- During pretreatment several animals received food in progress before Day 1 instead of weekly food consumption starting on Day 1 as stated in protocol.
- On Week 2, the weekly body weights and detailed clinical observations were not conducted for several Day 8 necropsy animals.
- On Week 9, the weekly body weights and detailed clinical observations for 16 animals were not conducted.

### Laboratory Evaluations

- At terminal collection, the volume of blood obtained, 0.4 mL for clinical chemistry and 0.4 mL of serum, for Group 2 females (Animal No. 2513 and 2511, respectively) were insufficient for analysis.
- At terminal collection, a Serum sample from 1 Group 2 female (Animal No. 2513) was unable to be obtained.

### Postmortem and Pathology

- At terminal necropsy, due to insufficient CSF volumes the technician was unable to collect two approximately equal aliquots for 1 Group 2 Female (Animal No. 2507) and at the time of frozen inventory the sample of CSF could not be found and was not available for analysis.
- At terminal necropsy, 1 Group 3 female (Animal No. 3506) was documented for having a RT-qPCR spinal cord thoracic A and B sample being collection. At the time of transfer no tissues were present in the vials and was not available for analysis.
- At terminal necropsy, the biceps femoris Sample A for 1 Group 4 female (Animal No. 4511) and the mandibular lymph node sample for 1 Group 4 male (Animal No. 4012) for

RT-PCR were placed in liquid nitrogen rather than refrigerated for up to 24 hours prior to frozen storage (-60°C to -90°C) with RNALater removed.

- At terminal necropsy, the Brain samples 1 and 2 were collected and combined under Brain Sample for DNA and RNA purification collections for several animals (Animal No. 2503, 3004, 4002, and 4505); therefore, no samples for Brain sample 2 were collected and not available for evaluation.
- At terminal necropsy, the qPCR tissues for several animals (Animal No. 1515, 2515, 3014, and 4015) were not transferred to frozen storage. Samples were found in dry ice container 6 days later and placed immediately on dry ice and laced in frozen storage (-60°C to -90°C).
- At terminal necropsy, only 1 bone smear sample was obtained for 1 Group 4 male (Animal No. 4003), short the protocol-specified 2 samples.
- At the time of tissue archival, the paraffin block 4 (Dorsal Root Ganglia) for 1 Group 4 female (Animal 4509) could not be located and was not available to be submitted to records management.

Appendix 2  
Test Article Characterization

The Certificate of Analysis was not received.

Appendix 3  
Record of Animal Fate and Disposition

**Abbreviations**

Term – Terminal necropsy

2759-001  
A Single Dose Toxicity Study of Test Article Administered by Intrathecal Injection in Rats

Record of Animal Fate and Disposition

Sex: Male Day(s): 1 → 91 Relative to Start Date

| Vehicle |      |             |
|---------|------|-------------|
|         | Fate | Removal Day |
| 1001    | Term | 91          |
| 1002    | Term | 91          |
| 1003    | Term | 91          |
| 1004    | Term | 91          |
| 1005    | Term | 91          |
| 1006    | Term | 8           |
| 1007    | Term | 8           |
| 1008    | Term | 8           |
| 1009    | Term | 8           |
| 1010    | Term | 8           |
| 1011    | Term | 29          |
| 1012    | Term | 29          |
| 1013    | Term | 29          |
| 1014    | Term | 29          |
| 1015    | Term | 29          |

---

2759-001  
A Single Dose Toxicity Study of Test Article Administered by Intrathecal Injection in Rats

Record of Animal Fate and Disposition

Sex: Male Day(s): 1 → 91 Relative to Start Date

| Low Dose |      |             |
|----------|------|-------------|
|          | Fate | Removal Day |
| 2001     | Term | 91          |
| 2002     | Term | 91          |
| 2003     | Term | 91          |
| 2004     | Term | 91          |
| 2005     | Term | 91          |
| 2006     | Term | 8           |
| 2007     | Term | 8           |
| 2008     | Term | 8           |
| 2009     | Term | 8           |
| 2010     | Term | 8           |
| 2011     | Term | 29          |
| 2012     | Term | 29          |
| 2013     | Term | 29          |
| 2014     | Term | 29          |
| 2015     | Term | 29          |

---

2759-001  
A Single Dose Toxicity Study of Test Article Administered by Intrathecal Injection in Rats

Record of Animal Fate and Disposition

Sex: Male Day(s): 1 → 91 Relative to Start Date

| Mid Dose |      |             |
|----------|------|-------------|
|          | Fate | Removal Day |
| 3001     | Term | 91          |
| 3002     | Term | 91          |
| 3003     | Term | 91          |
| 3004     | Term | 91          |
| 3005     | Term | 91          |
| 3006     | Term | 8           |
| 3007     | Term | 8           |
| 3008     | Term | 8           |
| 3009     | Term | 8           |
| 3010     | Term | 8           |
| 3011     | Term | 29          |
| 3012     | Term | 29          |
| 3013     | Term | 29          |
| 3014     | Term | 29          |
| 3015     | Term | 29          |

---



2759-001  
A Single Dose Toxicity Study of Test Article Administered by Intrathecal Injection in Rats

Record of Animal Fate and Disposition

Sex: Male Day(s): 1 → 91 Relative to Start Date

| High Dose |      |             |
|-----------|------|-------------|
|           | Fate | Removal Day |
| 4001      | Term | 91          |
| 4002      | Term | 91          |
| 4003      | Term | 91          |
| 4004      | Term | 91          |
| 4005      | Term | 91          |
| 4006      | Term | 8           |
| 4007      | Term | 8           |
| 4008      | Term | 8           |
| 4009      | Term | 8           |
| 4010      | Term | 8           |
| 4011      | Term | 29          |
| 4012      | Term | 29          |
| 4013      | Term | 29          |
| 4014      | Term | 29          |
| 4015      | Term | 29          |

---

2759-001  
A Single Dose Toxicity Study of Test Article Administered by Intrathecal Injection in Rats

Record of Animal Fate and Disposition

Sex: Female Day(s): 1 → 91 Relative to Start Date

| Vehicle |      |             |
|---------|------|-------------|
|         | Fate | Removal Day |
| 1501    | Term | 91          |
| 1502    | Term | 91          |
| 1503    | Term | 91          |
| 1504    | Term | 91          |
| 1505    | Term | 91          |
| 1506    | Term | 8           |
| 1507    | Term | 8           |
| 1508    | Term | 8           |
| 1509    | Term | 8           |
| 1510    | Term | 8           |
| 1511    | Term | 29          |
| 1512    | Term | 29          |
| 1513    | Term | 29          |
| 1514    | Term | 29          |
| 1515    | Term | 29          |

---

2759-001  
A Single Dose Toxicity Study of Test Article Administered by Intrathecal Injection in Rats

Record of Animal Fate and Disposition

Sex: Female Day(s): 1 → 91 Relative to Start Date

| Low Dose |      |             |
|----------|------|-------------|
|          | Fate | Removal Day |
| 2501     | Term | 91          |
| 2502     | Term | 91          |
| 2503     | Term | 91          |
| 2504     | Term | 91          |
| 2505     | Term | 91          |
| 2506     | Term | 8           |
| 2507     | Term | 8           |
| 2508     | Term | 8           |
| 2509     | Term | 8           |
| 2510     | Term | 8           |
| 2511     | Term | 29          |
| 2512     | Term | 29          |
| 2513     | Term | 29          |
| 2514     | Term | 29          |
| 2515     | Term | 29          |

---

2759-001  
A Single Dose Toxicity Study of Test Article Administered by Intrathecal Injection in Rats

Record of Animal Fate and Disposition

Sex: Female Day(s): 1 → 91 Relative to Start Date

| Mid Dose |      |             |
|----------|------|-------------|
|          | Fate | Removal Day |
| 3501     | Term | 91          |
| 3502     | Term | 91          |
| 3503     | Term | 91          |
| 3504     | Term | 91          |
| 3505     | Term | 91          |
| 3506     | Term | 8           |
| 3507     | Term | 8           |
| 3508     | Term | 8           |
| 3509     | Term | 8           |
| 3510     | Term | 8           |
| 3511     | Term | 29          |
| 3512     | Term | 29          |
| 3513     | Term | 29          |
| 3514     | Term | 29          |
| 3515     | Term | 29          |

---

2759-001  
A Single Dose Toxicity Study of Test Article Administered by Intrathecal Injection in Rats

Record of Animal Fate and Disposition

Sex: Female Day(s): 1 → 91 Relative to Start Date

| High Dose |      |             |
|-----------|------|-------------|
|           | Fate | Removal Day |
| 4501      | Term | 91          |
| 4502      | Term | 91          |
| 4503      | Term | 91          |
| 4504      | Term | 91          |
| 4505      | Term | 91          |
| 4506      | Term | 8           |
| 4507      | Term | 8           |
| 4508      | Term | 8           |
| 4509      | Term | 8           |
| 4510      | Term | 8           |
| 4511      | Term | 29          |
| 4512      | Term | 29          |
| 4513      | Term | 29          |
| 4514      | Term | 29          |
| 4515      | Term | 29          |

---

Appendix 4  
Individual Detailed Clinical Observations

On occasion, clinical findings may have been observed more than once during the interval and were recorded accordingly. The individual clinical observations table of this appendix reports the findings observed, not the number of times observed.

2759-001  
A Single Dose Toxicity Study of Test Article Administered by Intrathecal Injection in Rats

## Individual Detailed Clinical Observations

| Sex: Male | Animal             | Observation Type: Routine             | From Week -1 (Start Date) to 13 (Start Date)  |
|-----------|--------------------|---------------------------------------|-----------------------------------------------|
| Vehicle   | 1001               | Normal                                | -1, 1, 2, 3                                   |
|           |                    | Hair sparse, Face                     | 4, 5, 6, 7, 8, 10, 11, 12, 13                 |
|           |                    | Scabbed area, Face                    | 6, 7, 8, 13                                   |
|           | 1002               | Tail bent                             | -1, 1, 2, 3, 4, 5, 6, 7, 8, 10, 11, 12, 13    |
|           |                    | Hair sparse, Face                     | 8, 10, 11, 12, 13                             |
|           |                    | Scabbed area, Face                    | 7, 11, 12, 13                                 |
|           | 1003               | Normal                                | -1, 1, 2, 3, 4                                |
|           |                    | Tail bent                             | 5, 6, 7, 8, 9, 10, 11, 12, 13                 |
|           |                    | Hair discolored, Cervical region, Red | 12, 13                                        |
|           | 1004               | Normal                                | -1, 1, 2, 3, 4, 5, 6, 7, 8                    |
|           |                    | Hair discolored, Face, Brown          | 9, 10, 11, 12, 13                             |
|           | 1005               | Normal                                | -1, 1, 2, 3, 4, 5, 6, 7, 8, 9, 10, 11, 12, 13 |
|           | 1006               | Normal                                | -1, 1                                         |
|           | 1007               | Normal                                | -1, 1                                         |
|           | 1008               | Normal                                | -1, 1, 2                                      |
| 1009      | Normal             | -1, 1, 2                              |                                               |
| 1010      | Normal             | -1, 1, 2                              |                                               |
| 1011      | Normal             | -1, 1, 2, 3, 4, 5                     |                                               |
| 1012      | Normal             | -1, 1, 2, 3, 4, 5                     |                                               |
| 1013      | Normal             | -1, 1, 2, 3, 4, 5                     |                                               |
| 1014      | Normal             | -1, 1, 2, 3                           |                                               |
|           | Hair sparse, Face  | 5                                     |                                               |
|           | Scabbed area, Face | 4                                     |                                               |
|           | Normal             | -1, 1, 2, 3, 4, 5                     |                                               |
| 1015      | Normal             | -1, 1, 2, 3, 4, 5                     |                                               |
|           | Normal             | -1, 1, 2, 3, 4, 5, 6, 7, 8            |                                               |
|           | Normal             | 12, 13                                |                                               |
| Low Dose  | 2001               | Normal                                | -1, 1, 2, 3, 4, 5, 6, 7, 8                    |
|           |                    | Ear/portion of ear missing, Ear/left  | 12, 13                                        |
|           | 2002               | Hair sparse, Face                     | 10, 11, 12, 13                                |
|           |                    | Normal                                | -1, 1, 2, 3, 4, 5, 7, 8, 10, 11, 12, 13       |
|           |                    | Scabbed area, Face                    | 6                                             |

Values=Interval seen

2759-001  
A Single Dose Toxicity Study of Test Article Administered by Intrathecal Injection in Rats

## Individual Detailed Clinical Observations

| Sex: Male | Animal                                | Observation Type: Routine                     | From Week -1 (Start Date) to 13 (Start Date) |
|-----------|---------------------------------------|-----------------------------------------------|----------------------------------------------|
| Low Dose  | 2003                                  | Normal                                        | -1, 1, 2, 3, 4, 5, 6, 7, 8, 10, 11, 12, 13   |
|           |                                       | Hair sparse, Face                             | 13                                           |
|           | 2004                                  | Normal                                        | -1, 1, 2, 3, 4                               |
|           |                                       | Hair sparse, Face                             | 5, 6, 7, 8, 9, 10, 11, 12, 13                |
|           |                                       | Scabbed area, Face                            | 7, 8, 9, 10, 11, 12, 13                      |
|           | 2005                                  | Normal                                        | -1, 1, 2, 12, 13                             |
|           |                                       | Loss of skin elasticity                       | 3                                            |
|           |                                       | Scabbed area, Tail                            | 4, 5, 6, 7, 8, 9, 10, 11                     |
|           | 2006                                  | Normal                                        | -1, 1                                        |
|           | 2007                                  | Normal                                        | -1, 1                                        |
|           | 2008                                  | Normal                                        | -1, 1                                        |
|           | 2009                                  | Normal                                        | -1, 1, 2                                     |
|           | 2010                                  | Normal                                        | -1, 1                                        |
|           |                                       | Ear/portion of ear missing, Ear/right         | 2                                            |
|           | 2011                                  | Normal                                        | -1, 1, 2, 3, 4, 5                            |
| 2012      | Normal                                | -1, 1, 2, 3, 4, 5                             |                                              |
| 2013      | Normal                                | -1, 1, 2, 3, 4, 5                             |                                              |
| 2014      | Normal                                | -1, 1, 2, 3, 4                                |                                              |
| 2015      | Hair sparse, Face                     | 5                                             |                                              |
|           | Normal                                | -1, 1, 2, 3, 4, 5                             |                                              |
| Mid Dose  | 3001                                  | Normal                                        | -1, 1, 2, 3, 4, 5, 6, 7, 8, 10, 11, 12, 13   |
|           | 3002                                  | Normal                                        | -1, 1, 2, 3                                  |
|           |                                       | Hair sparse, Face                             | 4, 5, 6, 7, 8, 10, 11, 12, 13                |
|           |                                       | Scabbed area, Face                            | 4, 5, 6, 7, 8, 10, 11, 12, 13                |
|           | 3003                                  | Normal                                        | -1, 1, 2, 3, 4, 5, 6, 7, 8, 10, 11, 12, 13   |
|           |                                       | Loss of skin elasticity, Entire body          | 9                                            |
|           | 3004                                  | Normal                                        | -1, 1, 2, 3, 4, 5, 6, 7, 8, 9                |
| 3005      | Hair discolored, Cervical region, Red | 10, 11, 12, 13                                |                                              |
|           | Normal                                | -1, 1, 2, 3, 4, 5, 6, 7, 8, 9, 10, 11, 12, 13 |                                              |

Values=Interval seen



2759-001  
A Single Dose Toxicity Study of Test Article Administered by Intrathecal Injection in Rats

Individual Detailed Clinical Observations

| Sex: Male | Animal | Observation Type: Routine             | From Week -1 (Start Date) to 13 (Start Date)  |
|-----------|--------|---------------------------------------|-----------------------------------------------|
| Mid Dose  | 3006   | Normal                                | -1, 1                                         |
|           | 3007   | Normal                                | -1, 1                                         |
|           | 3008   | Normal                                | -1, 1, 2                                      |
|           | 3009   | Normal                                | -1, 1, 2                                      |
|           | 3010   | Normal                                | -1, 1, 2                                      |
|           | 3011   | Normal                                | -1, 1, 2                                      |
|           |        | Ear/portion of ear missing, Ear/left  | 3, 4, 5                                       |
|           | 3012   | Normal                                | -1, 1, 2, 3, 4, 5                             |
|           | 3013   | Normal                                | -1, 1, 2                                      |
|           |        | Ear/portion of ear missing, Ear/right | 3, 4, 5                                       |
|           | 3014   | Normal                                | -1, 1, 2, 3, 4, 5                             |
|           | 3015   | Normal                                | -1, 1, 2, 3, 4, 5                             |
| High Dose | 4001   | Normal                                | -1, 1, 2, 3, 4                                |
|           |        | Ear/portion of ear missing, Ear/left  | 7, 8, 9, 10, 11, 12, 13                       |
|           |        | Hair sparse, Face                     | 5, 6, 7, 8, 9, 10, 11, 12, 13                 |
|           |        | Scabbed area, Face                    | 9, 10, 11, 12, 13                             |
|           | 4002   | Normal                                | -1, 1, 2, 3, 4, 5, 6, 7, 8, 9, 10             |
|           |        | Hair discolored, Face, Brown          | 11, 12, 13                                    |
|           | 4003   | Normal                                | -1, 1, 2, 3, 4, 5, 6, 7, 8, 9, 10, 11, 12, 13 |
|           | 4004   | Normal                                | -1, 1, 2, 3, 4, 5, 6, 7, 8, 9, 10, 11, 12, 13 |
|           | 4005   | Normal                                | -1, 1, 2, 3, 4, 5, 6, 7, 8, 9, 10             |
|           |        | Hair discolored, Face, Red            | 11, 12, 13                                    |
|           | 4006   | Normal                                | -1, 1, 2                                      |
|           | 4007   | Normal                                | -1, 1, 2                                      |
|           | 4008   | Normal                                | -1, 1, 2                                      |
|           | 4009   | Normal                                | -1, 1, 2                                      |
| 4010      | Normal | -1, 1, 2                              |                                               |
| 4011      | Normal | -1, 1, 2, 3, 4, 5                     |                                               |
| 4012      | Normal | -1, 1, 2, 3, 4, 5                     |                                               |

Values=Interval seen

2759-001  
 A Single Dose Toxicity Study of Test Article Administered by Intrathecal Injection in Rats

Individual Detailed Clinical Observations

| Sex: Male | Animal | Observation Type: Routine | From Week -1 (Start Date) to 13 (Start Date) |
|-----------|--------|---------------------------|----------------------------------------------|
| High Dose | 4013   | Normal                    | -1, 1, 2                                     |
|           |        | Hair sparse, Face         | 3, 4, 5                                      |
|           |        | Scabbed area, Face        | 5                                            |
|           | 4014   | Normal                    | -1, 1, 2, 3, 4, 5                            |
|           | 4015   | Normal                    | -1, 1, 2                                     |
|           |        | Hair sparse, Face         | 3, 4, 5                                      |
|           |        | Scabbed area, Face        | 5                                            |

Values=Interval seen

2759-001  
A Single Dose Toxicity Study of Test Article Administered by Intrathecal Injection in Rats

## Individual Detailed Clinical Observations

| Sex: Female | Animal                                | Observation Type: Routine             | From Week -1 (Start Date) to 13 (Start Date) |
|-------------|---------------------------------------|---------------------------------------|----------------------------------------------|
| Vehicle     | 1501                                  | Normal                                | -1, 1, 2, 3, 4, 5, 6, 7, 8, 10, 11, 12, 13   |
|             | 1502                                  | Normal                                | -1, 1, 2, 3, 4, 5, 6, 8, 10, 11, 12, 13      |
|             |                                       | Hair sparse, Face                     | 13                                           |
|             |                                       | Hair sparse, Lumbar region            | 7                                            |
|             | 1503                                  | Normal                                | -1, 1, 2, 3, 4, 5, 6, 7, 8, 10, 11, 12, 13   |
|             | 1504                                  | Normal                                | -1, 1, 2, 3, 4, 5, 6                         |
|             |                                       | Hair discolored, Cervical region, Red | 7, 8, 9, 10, 11, 12, 13                      |
|             |                                       | Hair discolored, Face, Red            | 9, 10, 11, 12, 13                            |
|             |                                       | Loss of skin elasticity               | 7                                            |
|             | 1505                                  | Normal                                | -1, 1, 2, 3, 4, 5, 6, 8, 9, 10, 11, 12, 13   |
|             |                                       | Loss of skin elasticity               | 7                                            |
|             | 1506                                  | Normal                                | -1, 1                                        |
|             | 1507                                  | Normal                                | -1, 1                                        |
|             | 1508                                  | Normal                                | -1, 1                                        |
|             | 1509                                  | Normal                                | -1, 1, 2                                     |
| 1510        | Normal                                | -1, 1, 2                              |                                              |
| 1511        | Normal                                | -1, 1, 2, 3, 4, 5                     |                                              |
| 1512        | Normal                                | -1, 1, 2, 3, 4, 5                     |                                              |
| 1513        | Normal                                | -1, 1, 2, 3, 4, 5                     |                                              |
| 1514        | Normal                                | -1, 1, 2, 3, 4, 5                     |                                              |
| 1515        | Normal                                | -1, 1, 2, 3, 4, 5                     |                                              |
| Low Dose    | 2501                                  | Normal                                | -1, 1, 2, 3, 4, 5, 6, 7, 8                   |
|             | 2502                                  | Hair discolored, Face, Red            | 10, 11, 12, 13                               |
|             |                                       | Normal                                | -1, 1, 2, 3, 4, 5, 6, 7, 8, 13               |
|             | 2503                                  | Hair discolored, Cervical region, Red | 10, 11, 12, 13                               |
|             |                                       | Normal                                | -1, 1, 2, 3, 4, 5, 6, 7, 8, 9                |
| 2504        | Hair discolored, Cervical region, Red | 10, 11, 12, 13                        |                                              |
|             | Normal                                | -1, 1, 2, 3, 4, 5, 6, 7, 8, 9, 10, 11 |                                              |
|             |                                       | Hair discolored, Cervical region, Red | 12, 13                                       |

Values=Interval seen

2759-001  
A Single Dose Toxicity Study of Test Article Administered by Intrathecal Injection in Rats

Individual Detailed Clinical Observations

| Sex: Female                       | Animal                  | Observation Type: Routine                     | From Week -1 (Start Date) to 13 (Start Date) |                         |
|-----------------------------------|-------------------------|-----------------------------------------------|----------------------------------------------|-------------------------|
| Low Dose                          | 2505                    | Normal                                        | -1, 1, 2, 3, 4, 5, 6, 7, 8, 9                |                         |
|                                   |                         | Hair discolored, Face, Brown                  | 10, 11, 12, 13                               |                         |
|                                   | 2506                    | Normal                                        | -1, 1                                        |                         |
|                                   | 2507                    | Normal                                        | -1, 1                                        |                         |
|                                   | 2508                    | Normal                                        | -1, 1, 2                                     |                         |
|                                   | 2509                    | Normal                                        | -1, 1, 2                                     |                         |
|                                   | 2510                    | Normal                                        | -1, 1, 2                                     |                         |
|                                   | 2511                    | Normal                                        | -1, 1, 2, 3, 4, 5                            |                         |
|                                   | 2512                    | Normal                                        | -1, 1, 2, 3, 4, 5                            |                         |
|                                   | 2513                    | Normal                                        | -1, 1, 2, 3, 4, 5                            |                         |
|                                   | 2514                    | Normal                                        | -1, 1, 2, 3, 4, 5                            |                         |
|                                   | 2515                    | Normal                                        | -1, 1, 2, 3, 4, 5                            |                         |
|                                   | Mid Dose                | 3501                                          | Normal                                       | -1, 1, 2, 3, 4, 5, 7, 8 |
|                                   |                         |                                               | Hair discolored, Cervical region, Red        | 12, 13                  |
| Hair sparse, Face                 |                         |                                               | 6, 10, 11, 12, 13                            |                         |
| Nodule, Abdominal region, 5-20 mm |                         |                                               | 10, 11, 12, 13                               |                         |
| 3502                              |                         | Scabbed area, Face                            | 6                                            |                         |
| 3502                              |                         | Normal                                        | -1, 1, 2, 3, 4, 5, 6, 7, 8, 10, 11           |                         |
| 3503                              |                         | Hair discolored, Cervical region, Red         | 12, 13                                       |                         |
| 3503                              |                         | Normal                                        | -1, 1, 2, 3, 5, 6, 7, 8, 9, 10, 11, 12, 13   |                         |
| 3504                              |                         | Vocalization                                  | 4                                            |                         |
| 3504                              |                         | Normal                                        | -1, 1, 2, 3, 4, 5, 6, 7, 8, 12, 13           |                         |
| 3505                              |                         | Hair discolored, Cervical region, Red         | 9, 10, 11                                    |                         |
| 3505                              | Scabbed area, Ear/right | 9                                             |                                              |                         |
| 3506                              | Normal                  | -1, 1, 2, 3, 4, 5, 6, 7, 8, 9, 10, 11, 12, 13 |                                              |                         |
| 3507                              | Normal                  | -1, 1                                         |                                              |                         |
| 3508                              | Normal                  | -1, 1                                         |                                              |                         |
| 3508                              | Normal                  | -1, 1                                         |                                              |                         |
|                                   |                         | Hair sparse, Cervical region                  | 2                                            |                         |

Values=Interval seen

2759-001  
A Single Dose Toxicity Study of Test Article Administered by Intrathecal Injection in Rats

Individual Detailed Clinical Observations

| Sex: Female | Animal | Observation Type: Routine                                 | From Week -1 (Start Date) to 13 (Start Date) |
|-------------|--------|-----------------------------------------------------------|----------------------------------------------|
| Mid Dose    | 3509   | Normal                                                    | -1, 1, 2                                     |
|             | 3510   | Normal                                                    | -1, 1, 2                                     |
|             | 3511   | Normal                                                    | -1, 1, 2, 3, 4, 5                            |
|             | 3512   | Normal                                                    | -1, 1, 2, 3, 4, 5                            |
|             | 3513   | Normal                                                    | -1, 1, 2, 3, 4, 5                            |
|             | 3514   | Normal                                                    | -1, 1, 2, 3, 4, 5                            |
|             | 3515   | Normal                                                    | -1, 1, 3, 4                                  |
|             |        | Hair discolored, Face, Red<br>Scabbed area, Lumbar region | 5<br>2                                       |
| High Dose   | 4501   | Normal                                                    | -1, 1, 2, 3, 4, 5, 6, 7                      |
|             |        | Stereotypy, Straub tail                                   | 8, 10, 11, 12, 13                            |
|             | 4502   | Normal                                                    | -1, 1, 2, 3, 4, 5, 6, 7, 8, 10, 11, 12, 13   |
|             | 4503   | Normal                                                    | -1, 1, 2, 3, 4, 5, 6, 7, 8, 10, 11           |
|             |        | Vocalization                                              | 9                                            |
|             |        | Hair discolored, Cervical region, Red                     | 12, 13                                       |
|             | 4504   | Normal                                                    | -1, 1, 2, 4, 5, 6, 7, 8, 9, 10, 11, 12, 13   |
|             |        | Scabbed area, Thoracic region                             | 3                                            |
|             | 4505   | Normal                                                    | -1, 1, 2, 3, 4, 5, 6, 7, 8, 9, 10, 11        |
|             |        | Hair discolored, Cervical region, Red                     | 12, 13                                       |
|             | 4506   | Normal                                                    | -1, 1                                        |
|             | 4507   | Normal                                                    | -1, 1                                        |
|             | 4508   | Normal                                                    | -1, 1, 2                                     |
|             | 4509   | Normal                                                    | -1, 1, 2                                     |
|             | 4510   | Normal                                                    | -1, 1, 2                                     |
|             | 4511   | Normal                                                    | -1, 1, 2, 3, 4, 5                            |
|             | 4512   | Normal                                                    | -1, 1, 2, 3, 4, 5                            |
| 4513        | Normal | -1, 1, 2, 3, 4, 5                                         |                                              |
| 4514        | Normal | -1, 1, 2, 3, 4, 5                                         |                                              |
| 4515        | Normal | -1, 1, 2, 3, 4                                            |                                              |

Values=Interval seen

2759-001  
A Single Dose Toxicity Study of Test Article Administered by Intrathecal Injection in Rats

Individual Detailed Clinical Observations

|             |        |                            |                                              |
|-------------|--------|----------------------------|----------------------------------------------|
| Sex: Female | Animal | Observation Type: Routine  | From Week -1 (Start Date) to 13 (Start Date) |
| High Dose   | 4515   | Hair discolored, Face, Red | 5                                            |

Values=Interval seen

2759-001  
 A Single Dose Toxicity Study of Test Article Administered by Intrathecal Injection in Rats

Individual Detailed Clinical Observations

| Sex: Male | Animal | Observation Type: Unscheduled        | From Week -1 (Start Date) to 13 (Start Date) |
|-----------|--------|--------------------------------------|----------------------------------------------|
| Vehicle   | 1001   | Hair sparse, Face                    | 6                                            |
|           |        | Scabbed area, Face                   | 6                                            |
|           | 1002   | Tail bent                            | 6                                            |
|           |        | Hair sparse, Face                    | 6                                            |
|           |        | Scabbed area, Face                   | 6                                            |
| Mid Dose  | 3002   | Hair sparse, Face                    | 6                                            |
|           |        | Scabbed area, Face                   | 6                                            |
|           | 3011   | Ear/portion of ear missing, Ear/left | 3                                            |

Values=Interval seen

2759-001  
 A Single Dose Toxicity Study of Test Article Administered by Intrathecal Injection in Rats

Individual Detailed Clinical Observations

| Sex: Female | Animal | Observation Type: Unscheduled | From Week -1 (Start Date) to 13 (Start Date) |
|-------------|--------|-------------------------------|----------------------------------------------|
| Mid Dose    | 3501   | Swelling, Thoracic region     | 8                                            |
|             | 3504   | Discharge, Tail, Red          | 1                                            |
|             |        | Swelling, Tail                | 1                                            |

Values=Interval seen



Appendix 5  
Individual Body Weight Values

2759-001  
A Single Dose Toxicity Study of Test Article Administered by Intrathecal Injection in Rats

## Individual Body Weight Values

Sex: Male Body Weight (g)

| Vehicle | Day(s) Relative to Start Date |     |                  |     |     |     |     |     |     |     |     |     |     |     |
|---------|-------------------------------|-----|------------------|-----|-----|-----|-----|-----|-----|-----|-----|-----|-----|-----|
|         | -1                            | 1   | 8                | 15  | 22  | 29  | 36  | 43  | 50  | 60  | 64  | 71  | 78  | 85  |
| 1001    | 226                           | 234 | 286              | 333 | 369 | 401 | 409 | 442 | 454 | -   | 435 | 483 | 499 | 508 |
| 1002    | 255                           | 260 | 330              | 374 | 413 | 451 | 471 | 487 | 509 | -   | 481 | 526 | 541 | 561 |
| 1003    | 290                           | 291 | 334              | 370 | 397 | 424 | 450 | 477 | 491 | 509 | 513 | 529 | 534 | 547 |
| 1004    | 285                           | 289 | 339              | 371 | 405 | 426 | 440 | 459 | 477 | 495 | 497 | 500 | 510 | 518 |
| 1005    | 279                           | 279 | 332              | 367 | 393 | 414 | 432 | 461 | 488 | 495 | 503 | 512 | 516 | 536 |
| 1006    | 275                           | 286 | 330 <sup>a</sup> | -   | -   | -   | -   | -   | -   | -   | -   | -   | -   | -   |
| 1007    | 267                           | 275 | 306 <sup>a</sup> | -   | -   | -   | -   | -   | -   | -   | -   | -   | -   | -   |
| 1008    | 278                           | 280 | 323              | -   | -   | -   | -   | -   | -   | -   | -   | -   | -   | -   |
| 1009    | 282                           | 284 | 334              | -   | -   | -   | -   | -   | -   | -   | -   | -   | -   | -   |
| 1010    | 293                           | 289 | 351              | -   | -   | -   | -   | -   | -   | -   | -   | -   | -   | -   |
| 1011    | 313                           | 323 | 375              | 414 | 450 | 456 | -   | -   | -   | -   | -   | -   | -   | -   |
| 1012    | 285                           | 298 | 358              | 407 | 450 | 451 | -   | -   | -   | -   | -   | -   | -   | -   |
| 1013    | 293                           | 303 | 356              | 393 | 434 | 437 | -   | -   | -   | -   | -   | -   | -   | -   |
| 1014    | 306                           | 311 | 363              | 397 | 434 | 432 | -   | -   | -   | -   | -   | -   | -   | -   |
| 1015    | 297                           | 304 | 372              | 410 | 455 | 461 | -   | -   | -   | -   | -   | -   | -   | -   |

<sup>a</sup> Body weight recorded was fasted, necropsy weight.

2759-001  
A Single Dose Toxicity Study of Test Article Administered by Intrathecal Injection in Rats

Individual Body Weight Values

Sex: Male    Body Weight (g)

| Vehicle | Day(s)<br>Relative<br>to Start |
|---------|--------------------------------|
|         | 91                             |
| 1001    | 490                            |
| 1002    | 543                            |
| 1003    | 530                            |
| 1004    | 508                            |
| 1005    | 525                            |
| 1006    | -                              |
| 1007    | -                              |
| 1008    | -                              |
| 1009    | -                              |
| 1010    | -                              |
| 1011    | -                              |
| 1012    | -                              |
| 1013    | -                              |
| 1014    | -                              |
| 1015    | -                              |

2759-001  
A Single Dose Toxicity Study of Test Article Administered by Intrathecal Injection in Rats

Individual Body Weight Values

Sex: Male Body Weight (g)

| Low Dose | Day(s) Relative to Start Date |     |                  |     |     |     |     |     |     |     |     |     |     |     |
|----------|-------------------------------|-----|------------------|-----|-----|-----|-----|-----|-----|-----|-----|-----|-----|-----|
|          | -1                            | 1   | 8                | 15  | 22  | 29  | 36  | 43  | 50  | 57  | 64  | 71  | 78  | 85  |
| 2001     | 245                           | 249 | 294              | 333 | 358 | 379 | 398 | 422 | 440 | -   | 475 | 486 | 501 | 513 |
| 2002     | 259                           | 267 | 318              | 366 | 397 | 431 | 457 | 483 | 503 | -   | 543 | 551 | 577 | 601 |
| 2003     | 233                           | 239 | 290              | 328 | 363 | 391 | 410 | 435 | 439 | -   | 437 | 439 | 452 | 466 |
| 2004     | 275                           | 282 | 351              | 268 | 386 | 433 | 473 | 496 | 523 | 541 | 557 | 578 | 591 | 578 |
| 2005     | 253                           | 268 | 325              | 254 | 362 | 392 | 411 | 418 | 434 | 445 | 458 | 475 | 486 | 500 |
| 2006     | 272                           | 277 | 304 <sup>a</sup> | -   | -   | -   | -   | -   | -   | -   | -   | -   | -   | -   |
| 2007     | 259                           | 270 | 303 <sup>a</sup> | -   | -   | -   | -   | -   | -   | -   | -   | -   | -   | -   |
| 2008     | 283                           | 292 | 334 <sup>a</sup> | -   | -   | -   | -   | -   | -   | -   | -   | -   | -   | -   |
| 2009     | 242                           | 246 | 301              | -   | -   | -   | -   | -   | -   | -   | -   | -   | -   | -   |
| 2010     | 254                           | 259 | 318              | -   | -   | -   | -   | -   | -   | -   | -   | -   | -   | -   |
| 2011     | 305                           | 314 | 359              | 406 | 445 | 443 | -   | -   | -   | -   | -   | -   | -   | -   |
| 2012     | 286                           | 300 | 358              | 393 | 438 | 446 | -   | -   | -   | -   | -   | -   | -   | -   |
| 2013     | 305                           | 309 | 372              | 408 | 443 | 456 | -   | -   | -   | -   | -   | -   | -   | -   |
| 2014     | 294                           | 300 | 346              | 384 | 410 | 411 | -   | -   | -   | -   | -   | -   | -   | -   |
| 2015     | 313                           | 320 | 375              | 424 | 460 | 459 | -   | -   | -   | -   | -   | -   | -   | -   |

<sup>a</sup> Body weight recorded was fasted, necropsy weight.

2759-001  
A Single Dose Toxicity Study of Test Article Administered by Intrathecal Injection in Rats

Individual Body Weight Values

Sex: Male    Body Weight (g)

| Low Dose | Day(s)<br>Relative<br>to Start |
|----------|--------------------------------|
|          | 91                             |
| 2001     | 498                            |
| 2002     | 581                            |
| 2003     | 430                            |
| 2004     | 559                            |
| 2005     | 477                            |
| 2006     | -                              |
| 2007     | -                              |
| 2008     | -                              |
| 2009     | -                              |
| 2010     | -                              |
| 2011     | -                              |
| 2012     | -                              |
| 2013     | -                              |
| 2014     | -                              |
| 2015     | -                              |

2759-001  
A Single Dose Toxicity Study of Test Article Administered by Intrathecal Injection in Rats

Individual Body Weight Values

Sex: Male Body Weight (g)

| Mid Dose | Day(s) Relative to Start Date |     |                  |     |     |     |     |     |     |     |     |     |     |     |
|----------|-------------------------------|-----|------------------|-----|-----|-----|-----|-----|-----|-----|-----|-----|-----|-----|
|          | -1                            | 1   | 8                | 15  | 22  | 29  | 36  | 43  | 50  | 60  | 64  | 71  | 78  | 85  |
| 3001     | 237                           | 240 | 295              | 332 | 363 | 395 | 424 | 447 | 463 | -   | 431 | 489 | 507 | 524 |
| 3002     | 257                           | 265 | 323              | 365 | 405 | 431 | 453 | 481 | 495 | -   | 472 | 524 | 547 | 562 |
| 3003     | 297                           | 305 | 358              | 413 | 458 | 497 | 513 | 529 | 553 | 513 | 569 | 592 | 603 | 617 |
| 3004     | 261                           | 271 | 319              | 365 | 392 | 428 | 457 | 478 | 505 | 463 | 517 | 538 | 548 | 570 |
| 3005     | 300                           | 306 | 357              | 397 | 439 | 474 | 497 | 520 | 551 | 517 | 573 | 593 | 620 | 638 |
| 3006     | 278                           | 292 | 324 <sup>a</sup> | -   | -   | -   | -   | -   | -   | -   | -   | -   | -   | -   |
| 3007     | 273                           | 282 | 314 <sup>a</sup> | -   | -   | -   | -   | -   | -   | -   | -   | -   | -   | -   |
| 3008     | 290                           | 294 | 352              | -   | -   | -   | -   | -   | -   | -   | -   | -   | -   | -   |
| 3009     | 280                           | 282 | 331              | -   | -   | -   | -   | -   | -   | -   | -   | -   | -   | -   |
| 3010     | 278                           | 280 | 328              | -   | -   | -   | -   | -   | -   | -   | -   | -   | -   | -   |
| 3011     | 301                           | 308 | 351              | 381 | 411 | 406 | -   | -   | -   | -   | -   | -   | -   | -   |
| 3012     | 281                           | 284 | 326              | 366 | 388 | 384 | -   | -   | -   | -   | -   | -   | -   | -   |
| 3013     | 328                           | 336 | 399              | 448 | 486 | 488 | -   | -   | -   | -   | -   | -   | -   | -   |
| 3014     | 261                           | 281 | 348              | 415 | 465 | 468 | -   | -   | -   | -   | -   | -   | -   | -   |
| 3015     | 234                           | 246 | 297              | 333 | 371 | 378 | -   | -   | -   | -   | -   | -   | -   | -   |

<sup>a</sup> Body weight recorded was fasted, necropsy weight.

2759-001  
A Single Dose Toxicity Study of Test Article Administered by Intrathecal Injection in Rats

Individual Body Weight Values

Sex: Male    Body Weight (g)

| Mid Dose | Day(s)<br>Relative<br>to Start |
|----------|--------------------------------|
|          | 91                             |
| 3001     | 503                            |
| 3002     | 538                            |
| 3003     | 605                            |
| 3004     | 561                            |
| 3005     | 625                            |
| 3006     | -                              |
| 3007     | -                              |
| 3008     | -                              |
| 3009     | -                              |
| 3010     | -                              |
| 3011     | -                              |
| 3012     | -                              |
| 3013     | -                              |
| 3014     | -                              |
| 3015     | -                              |





2759-001  
 A Single Dose Toxicity Study of Test Article Administered by Intrathecal Injection in Rats

Individual Body Weight Values

Sex: Male    Body Weight (g)

| High Dose | Day(s) Relative to Start Date |     |
|-----------|-------------------------------|-----|
|           | 85                            | 91  |
| 4001      | 667                           | 648 |
| 4002      | 536                           | 514 |
| 4003      | 505                           | 500 |
| 4004      | 686                           | 674 |
| 4005      | 593                           | 581 |
| 4006      | -                             | -   |
| 4007      | -                             | -   |
| 4008      | -                             | -   |
| 4009      | -                             | -   |
| 4010      | -                             | -   |
| 4011      | -                             | -   |
| 4012      | -                             | -   |
| 4013      | -                             | -   |
| 4014      | -                             | -   |
| 4015      | -                             | -   |

2759-001  
A Single Dose Toxicity Study of Test Article Administered by Intrathecal Injection in Rats

Individual Body Weight Values

Sex: Female Body Weight (g)

| Vehicle | Day(s) Relative to Start Date |     |                  |     |     |     |     |     |     |     |     |     |     |     |
|---------|-------------------------------|-----|------------------|-----|-----|-----|-----|-----|-----|-----|-----|-----|-----|-----|
|         | -1                            | 1   | 8                | 15  | 22  | 29  | 36  | 43  | 50  | 57  | 64  | 71  | 78  | 85  |
| 1501    | 179                           | 177 | 207              | 223 | 246 | 267 | 270 | 266 | 287 | -   | 299 | 285 | 291 | 282 |
| 1502    | 174                           | 178 | 208              | 231 | 246 | 254 | 264 | 275 | 279 | -   | 289 | 293 | 302 | 299 |
| 1503    | 171                           | 170 | 194              | 222 | 243 | 262 | 274 | 286 | 292 | -   | 304 | 309 | 317 | 322 |
| 1504    | 176                           | 185 | 198              | 217 | 219 | 225 | 228 | 175 | 239 | 241 | 248 | 249 | 252 | 248 |
| 1505    | 196                           | 207 | 223              | 239 | 247 | 267 | 284 | 207 | 284 | 303 | 313 | 330 | 328 | 328 |
| 1506    | 184                           | 192 | 191 <sup>a</sup> | -   | -   | -   | -   | -   | -   | -   | -   | -   | -   | -   |
| 1507    | 202                           | 201 | 196 <sup>a</sup> | -   | -   | -   | -   | -   | -   | -   | -   | -   | -   | -   |
| 1508    | 169                           | 174 | 173 <sup>a</sup> | -   | -   | -   | -   | -   | -   | -   | -   | -   | -   | -   |
| 1509    | 189                           | 200 | 215              | -   | -   | -   | -   | -   | -   | -   | -   | -   | -   | -   |
| 1510    | 186                           | 187 | 200              | -   | -   | -   | -   | -   | -   | -   | -   | -   | -   | -   |
| 1511    | 195                           | 194 | 225              | 229 | 253 | 252 | -   | -   | -   | -   | -   | -   | -   | -   |
| 1512    | 192                           | 191 | 224              | 239 | 260 | 259 | -   | -   | -   | -   | -   | -   | -   | -   |
| 1513    | 183                           | 180 | 208              | 226 | 243 | 228 | -   | -   | -   | -   | -   | -   | -   | -   |
| 1514    | 192                           | 202 | 221              | 238 | 260 | 256 | -   | -   | -   | -   | -   | -   | -   | -   |
| 1515    | 188                           | 183 | 209              | 227 | 237 | 230 | -   | -   | -   | -   | -   | -   | -   | -   |

<sup>a</sup> Body weight recorded was fasted, necropsy weight.

2759-001  
A Single Dose Toxicity Study of Test Article Administered by Intrathecal Injection in Rats

Individual Body Weight Values

Sex: Female    Body Weight (g)

| Vehicle | Day(s)<br>Relative<br>to Start |
|---------|--------------------------------|
|         | 91                             |
| 1501    | 286                            |
| 1502    | 294                            |
| 1503    | 300                            |
| 1504    | 247                            |
| 1505    | 307                            |
| 1506    | -                              |
| 1507    | -                              |
| 1508    | -                              |
| 1509    | -                              |
| 1510    | -                              |
| 1511    | -                              |
| 1512    | -                              |
| 1513    | -                              |
| 1514    | -                              |
| 1515    | -                              |

2759-001  
A Single Dose Toxicity Study of Test Article Administered by Intrathecal Injection in Rats

Individual Body Weight Values

Sex: Female Body Weight (g)

| Low Dose | Day(s) Relative to Start Date |     |                  |     |     |     |     |     |     |     |     |     |     |     |
|----------|-------------------------------|-----|------------------|-----|-----|-----|-----|-----|-----|-----|-----|-----|-----|-----|
|          | -1                            | 1   | 8                | 15  | 22  | 29  | 36  | 43  | 50  | 60  | 64  | 71  | 78  | 85  |
| 2501     | 173                           | 174 | 203              | 223 | 235 | 249 | 243 | 256 | 276 | -   | 262 | 291 | 300 | 318 |
| 2502     | 168                           | 169 | 200              | 217 | 231 | 237 | 244 | 252 | 264 | -   | 256 | 293 | 296 | 310 |
| 2503     | 188                           | 185 | 203              | 224 | 228 | 237 | 249 | 250 | 259 | 255 | 261 | 268 | 277 | 271 |
| 2504     | 183                           | 182 | 191              | 205 | 200 | 218 | 232 | 228 | 225 | 246 | 238 | 245 | 243 | 252 |
| 2505     | 200                           | 201 | 222              | 240 | 240 | 256 | 271 | 268 | 265 | 286 | 280 | 284 | 291 | 298 |
| 2506     | 193                           | 193 | 206 <sup>a</sup> | -   | -   | -   | -   | -   | -   | -   | -   | -   | -   | -   |
| 2507     | 207                           | 208 | 216 <sup>a</sup> | -   | -   | -   | -   | -   | -   | -   | -   | -   | -   | -   |
| 2508     | 188                           | 189 | 200              | -   | -   | -   | -   | -   | -   | -   | -   | -   | -   | -   |
| 2509     | 180                           | 180 | 185              | -   | -   | -   | -   | -   | -   | -   | -   | -   | -   | -   |
| 2510     | 189                           | 186 | 198              | -   | -   | -   | -   | -   | -   | -   | -   | -   | -   | -   |
| 2511     | 189                           | 193 | 205              | 220 | 229 | 219 | -   | -   | -   | -   | -   | -   | -   | -   |
| 2512     | 198                           | 200 | 232              | 252 | 258 | 253 | -   | -   | -   | -   | -   | -   | -   | -   |
| 2513     | 173                           | 174 | 191              | 199 | 209 | 205 | -   | -   | -   | -   | -   | -   | -   | -   |
| 2514     | 198                           | 195 | 216              | 236 | 253 | 229 | -   | -   | -   | -   | -   | -   | -   | -   |
| 2515     | 176                           | 179 | 202              | 215 | 226 | 221 | -   | -   | -   | -   | -   | -   | -   | -   |

<sup>a</sup> Body weight recorded was fasted, necropsy weight.

2759-001  
A Single Dose Toxicity Study of Test Article Administered by Intrathecal Injection in Rats

Individual Body Weight Values

Sex: Female    Body Weight (g)

| Low Dose | Day(s)<br>Relative<br>to Start |
|----------|--------------------------------|
|          | 91                             |
| 2501     | 294                            |
| 2502     | 291                            |
| 2503     | 266                            |
| 2504     | 248                            |
| 2505     | 289                            |
| 2506     | -                              |
| 2507     | -                              |
| 2508     | -                              |
| 2509     | -                              |
| 2510     | -                              |
| 2511     | -                              |
| 2512     | -                              |
| 2513     | -                              |
| 2514     | -                              |
| 2515     | -                              |

2759-001  
A Single Dose Toxicity Study of Test Article Administered by Intrathecal Injection in Rats

Individual Body Weight Values

Sex: Female Body Weight (g)

| Mid Dose | Day(s) Relative to Start Date |     |                  |     |     |     |     |     |     |     |     |     |     |     |
|----------|-------------------------------|-----|------------------|-----|-----|-----|-----|-----|-----|-----|-----|-----|-----|-----|
|          | -1                            | 1   | 8                | 15  | 22  | 29  | 36  | 43  | 50  | 57  | 64  | 71  | 78  | 85  |
| 3501     | 165                           | 169 | 199              | 215 | 232 | 231 | 262 | 272 | 271 | -   | 281 | 283 | 290 | 298 |
| 3502     | 178                           | 183 | 206              | 235 | 255 | 271 | 273 | 271 | 292 | -   | 309 | 306 | 313 | 323 |
| 3503     | 182                           | 190 | 212              | 232 | 232 | 241 | 244 | 250 | 259 | 273 | 267 | 272 | 280 | 278 |
| 3504     | 191                           | 203 | 215              | 229 | 242 | 253 | 261 | 253 | 268 | 272 | 282 | 270 | 273 | 279 |
| 3505     | 180                           | 182 | 206              | 221 | 238 | 238 | 246 | 257 | 267 | 266 | 268 | 269 | 273 | 277 |
| 3506     | 191                           | 198 | 204 <sup>a</sup> | -   | -   | -   | -   | -   | -   | -   | -   | -   | -   | -   |
| 3507     | 191                           | 187 | 193 <sup>a</sup> | -   | -   | -   | -   | -   | -   | -   | -   | -   | -   | -   |
| 3508     | 183                           | 185 | 193              | -   | -   | -   | -   | -   | -   | -   | -   | -   | -   | -   |
| 3509     | 187                           | 191 | 206              | -   | -   | -   | -   | -   | -   | -   | -   | -   | -   | -   |
| 3510     | 183                           | 192 | 204              | -   | -   | -   | -   | -   | -   | -   | -   | -   | -   | -   |
| 3511     | 189                           | 189 | 212              | 219 | 237 | 240 | -   | -   | -   | -   | -   | -   | -   | -   |
| 3512     | 171                           | 164 | 191              | 198 | 206 | 198 | -   | -   | -   | -   | -   | -   | -   | -   |
| 3513     | 190                           | 188 | 214              | 219 | 239 | 235 | -   | -   | -   | -   | -   | -   | -   | -   |
| 3514     | 170                           | 176 | 194              | 210 | 219 | 207 | -   | -   | -   | -   | -   | -   | -   | -   |
| 3515     | 201                           | 197 | 234              | 252 | 267 | 255 | -   | -   | -   | -   | -   | -   | -   | -   |

<sup>a</sup> Body weight recorded was fasted, necropsy weight.

2759-001  
A Single Dose Toxicity Study of Test Article Administered by Intrathecal Injection in Rats

Individual Body Weight Values

Sex: Female    Body Weight (g)

| Mid Dose | Day(s)<br>Relative<br>to Start |
|----------|--------------------------------|
|          | 91                             |
| 3501     | 284                            |
| 3502     | 309                            |
| 3503     | 271                            |
| 3504     | 265                            |
| 3505     | 269                            |
| 3506     | -                              |
| 3507     | -                              |
| 3508     | -                              |
| 3509     | -                              |
| 3510     | -                              |
| 3511     | -                              |
| 3512     | -                              |
| 3513     | -                              |
| 3514     | -                              |
| 3515     | -                              |

2759-001  
A Single Dose Toxicity Study of Test Article Administered by Intrathecal Injection in Rats

Individual Body Weight Values

Sex: Female Body Weight (g)

| High Dose | Day(s) Relative to Start Date |     |                  |     |     |     |     |     |     |     |     |     |     |     |
|-----------|-------------------------------|-----|------------------|-----|-----|-----|-----|-----|-----|-----|-----|-----|-----|-----|
|           | -1                            | 1   | 8                | 15  | 22  | 29  | 36  | 43  | 50  | 60  | 64  | 71  | 78  | 85  |
| 4501      | 172                           | 178 | 209              | 223 | 241 | 260 | 258 | 287 | 275 | -   | 270 | 283 | 300 | 329 |
| 4502      | 186                           | 189 | 215              | 235 | 255 | 278 | 289 | 305 | 308 | -   | 297 | 302 | 338 | 358 |
| 4503      | 186                           | 190 | 210              | 229 | 249 | 268 | 272 | 273 | 295 | 297 | 295 | 296 | 302 | 308 |
| 4504      | 193                           | 196 | 219              | 238 | 261 | 275 | 293 | 300 | 314 | 323 | 326 | 326 | 342 | 343 |
| 4505      | 188                           | 186 | 211              | 241 | 250 | 253 | 273 | 277 | 285 | 298 | 295 | 296 | 304 | 308 |
| 4506      | 176                           | 185 | 176 <sup>a</sup> | -   | -   | -   | -   | -   | -   | -   | -   | -   | -   | -   |
| 4507      | 180                           | 183 | 169 <sup>a</sup> | -   | -   | -   | -   | -   | -   | -   | -   | -   | -   | -   |
| 4508      | 189                           | 187 | 199              | -   | -   | -   | -   | -   | -   | -   | -   | -   | -   | -   |
| 4509      | 199                           | 197 | 210              | -   | -   | -   | -   | -   | -   | -   | -   | -   | -   | -   |
| 4510      | 202                           | 201 | 207              | -   | -   | -   | -   | -   | -   | -   | -   | -   | -   | -   |
| 4511      | 191                           | 197 | 233              | 255 | 263 | 250 | -   | -   | -   | -   | -   | -   | -   | -   |
| 4512      | 185                           | 190 | 208              | 228 | 251 | 238 | -   | -   | -   | -   | -   | -   | -   | -   |
| 4513      | 177                           | 182 | 202              | 218 | 230 | 213 | -   | -   | -   | -   | -   | -   | -   | -   |
| 4514      | 193                           | 195 | 215              | 231 | 261 | 257 | -   | -   | -   | -   | -   | -   | -   | -   |
| 4515      | 172                           | 171 | 191              | 200 | 195 | 200 | -   | -   | -   | -   | -   | -   | -   | -   |

<sup>a</sup> Body weight recorded was fasted, necropsy weight.



2759-001  
A Single Dose Toxicity Study of Test Article Administered by Intrathecal Injection in Rats

Individual Body Weight Values

Sex: Female    Body Weight (g)

| High Dose | Day(s)<br>Relative<br>to Start |
|-----------|--------------------------------|
|           | 91                             |
| 4501      | 308                            |
| 4502      | 337                            |
| 4503      | 287                            |
| 4504      | 331                            |
| 4505      | 294                            |
| 4506      | -                              |
| 4507      | -                              |
| 4508      | -                              |
| 4509      | -                              |
| 4510      | -                              |
| 4511      | -                              |
| 4512      | -                              |
| 4513      | -                              |
| 4514      | -                              |
| 4515      | -                              |

Appendix 6  
Individual Body Weight Change Values

2759-001  
A Single Dose Toxicity Study of Test Article Administered by Intrathecal Injection in Rats

## Individual Body Weight Change Values, g

Sex: Male Body Weight Change

| Vehicle | Day(s) Relative to Start Date |                 |        |         |         |         |         |         |         |         |         |         |         |         |
|---------|-------------------------------|-----------------|--------|---------|---------|---------|---------|---------|---------|---------|---------|---------|---------|---------|
|         | -1 → 1                        | 1 → 8           | 8 → 15 | 15 → 22 | 22 → 29 | 29 → 36 | 36 → 43 | 43 → 50 | 50 → 60 | 60 → 64 | 50 → 64 | 64 → 71 | 71 → 78 | 78 → 85 |
| 1001    | 8                             | 52              | 47     | 36      | 32      | 8       | 33      | 12      | -       | -       | -19     | 48      | 16      | 9       |
| 1002    | 5                             | 70              | 44     | 39      | 38      | 20      | 16      | 22      | -       | -       | -28     | 45      | 15      | 20      |
| 1003    | 1                             | 43              | 36     | 27      | 27      | 26      | 27      | 14      | 18      | 4       | -       | 16      | 5       | 13      |
| 1004    | 4                             | 50              | 32     | 34      | 21      | 14      | 19      | 18      | 18      | 2       | -       | 3       | 10      | 8       |
| 1005    | 0                             | 53              | 35     | 26      | 21      | 18      | 29      | 27      | 7       | 8       | -       | 9       | 4       | 20      |
| 1006    | 11                            | 44 <sup>a</sup> | -      | -       | -       | -       | -       | -       | -       | -       | -       | -       | -       | -       |
| 1007    | 8                             | 31 <sup>a</sup> | -      | -       | -       | -       | -       | -       | -       | -       | -       | -       | -       | -       |
| 1008    | 2                             | 43              | -      | -       | -       | -       | -       | -       | -       | -       | -       | -       | -       | -       |
| 1009    | 2                             | 50              | -      | -       | -       | -       | -       | -       | -       | -       | -       | -       | -       | -       |
| 1010    | -4                            | 62              | -      | -       | -       | -       | -       | -       | -       | -       | -       | -       | -       | -       |
| 1011    | 10                            | 52              | 39     | 36      | 6       | -       | -       | -       | -       | -       | -       | -       | -       | -       |
| 1012    | 13                            | 60              | 49     | 43      | 1       | -       | -       | -       | -       | -       | -       | -       | -       | -       |
| 1013    | 10                            | 53              | 37     | 41      | 3       | -       | -       | -       | -       | -       | -       | -       | -       | -       |
| 1014    | 5                             | 52              | 34     | 37      | -2      | -       | -       | -       | -       | -       | -       | -       | -       | -       |
| 1015    | 7                             | 68              | 38     | 45      | 6       | -       | -       | -       | -       | -       | -       | -       | -       | -       |

<sup>a</sup> Day 8 body weight recorded was fasted, necropsy weight.

2759-001  
A Single Dose Toxicity Study of Test Article Administered by Intrathecal Injection in Rats

Individual Body Weight Change Values, g

Sex: Male Body Weight Change

| Vehicle | Day(s)<br>Relative<br>to Start |
|---------|--------------------------------|
|         | 85 → 91                        |
| 1001    | -18                            |
| 1002    | -18                            |
| 1003    | -17                            |
| 1004    | -10                            |
| 1005    | -11                            |
| 1006    | -                              |
| 1007    | -                              |
| 1008    | -                              |
| 1009    | -                              |
| 1010    | -                              |
| 1011    | -                              |
| 1012    | -                              |
| 1013    | -                              |
| 1014    | -                              |
| 1015    | -                              |

---

2759-001  
A Single Dose Toxicity Study of Test Article Administered by Intrathecal Injection in Rats

Individual Body Weight Change Values, g

Sex: Male Body Weight Change

| Low Dose | Day(s) Relative to Start Date |                 |        |         |         |         |         |         |         |         |         |         |         |         |
|----------|-------------------------------|-----------------|--------|---------|---------|---------|---------|---------|---------|---------|---------|---------|---------|---------|
|          | -1 → 1                        | 1 → 8           | 8 → 15 | 15 → 22 | 22 → 29 | 29 → 36 | 36 → 43 | 43 → 50 | 50 → 57 | 57 → 64 | 50 → 64 | 64 → 71 | 71 → 78 | 78 → 85 |
| 2001     | 4                             | 45              | 39     | 25      | 21      | 19      | 24      | 18      | -       | -       | 35      | 11      | 15      | 12      |
| 2002     | 8                             | 51              | 48     | 31      | 34      | 26      | 26      | 20      | -       | -       | 40      | 8       | 26      | 24      |
| 2003     | 6                             | 51              | 38     | 35      | 28      | 19      | 25      | 4       | -       | -       | -2      | 2       | 13      | 14      |
| 2004     | 7                             | 69              | -83    | 118     | 47      | 40      | 23      | 27      | 18      | 16      | -       | 21      | 13      | -13     |
| 2005     | 15                            | 57              | -71    | 108     | 30      | 19      | 7       | 16      | 11      | 13      | -       | 17      | 11      | 14      |
| 2006     | 5                             | 27 <sup>a</sup> | -      | -       | -       | -       | -       | -       | -       | -       | -       | -       | -       | -       |
| 2007     | 11                            | 33 <sup>a</sup> | -      | -       | -       | -       | -       | -       | -       | -       | -       | -       | -       | -       |
| 2008     | 9                             | 42 <sup>a</sup> | -      | -       | -       | -       | -       | -       | -       | -       | -       | -       | -       | -       |
| 2009     | 4                             | 55              | -      | -       | -       | -       | -       | -       | -       | -       | -       | -       | -       | -       |
| 2010     | 5                             | 59              | -      | -       | -       | -       | -       | -       | -       | -       | -       | -       | -       | -       |
| 2011     | 9                             | 45              | 47     | 39      | -2      | -       | -       | -       | -       | -       | -       | -       | -       | -       |
| 2012     | 14                            | 58              | 35     | 45      | 8       | -       | -       | -       | -       | -       | -       | -       | -       | -       |
| 2013     | 4                             | 63              | 36     | 35      | 13      | -       | -       | -       | -       | -       | -       | -       | -       | -       |
| 2014     | 6                             | 46              | 38     | 26      | 1       | -       | -       | -       | -       | -       | -       | -       | -       | -       |
| 2015     | 7                             | 55              | 49     | 36      | -1      | -       | -       | -       | -       | -       | -       | -       | -       | -       |

<sup>a</sup> Day 8 body weight recorded was fasted, necropsy weight.

2759-001  
A Single Dose Toxicity Study of Test Article Administered by Intrathecal Injection in Rats

Individual Body Weight Change Values, g

Sex: Male Body Weight Change

| Low Dose | Day(s)<br>Relative<br>to Start |
|----------|--------------------------------|
|          | 85 → 91                        |
| 2001     | -15                            |
| 2002     | -20                            |
| 2003     | -36                            |
| 2004     | -19                            |
| 2005     | -23                            |
| 2006     | -                              |
| 2007     | -                              |
| 2008     | -                              |
| 2009     | -                              |
| 2010     | -                              |
| 2011     | -                              |
| 2012     | -                              |
| 2013     | -                              |
| 2014     | -                              |
| 2015     | -                              |

---

2759-001  
A Single Dose Toxicity Study of Test Article Administered by Intrathecal Injection in Rats

Individual Body Weight Change Values, g

Sex: Male Body Weight Change

| Mid Dose | Day(s) Relative to Start Date |                 |        |         |         |         |         |         |         |         |         |         |         |         |
|----------|-------------------------------|-----------------|--------|---------|---------|---------|---------|---------|---------|---------|---------|---------|---------|---------|
|          | -1 → 1                        | 1 → 8           | 8 → 15 | 15 → 22 | 22 → 29 | 29 → 36 | 36 → 43 | 43 → 50 | 50 → 60 | 60 → 64 | 50 → 64 | 64 → 71 | 71 → 78 | 78 → 85 |
| 3001     | 3                             | 55              | 37     | 31      | 32      | 29      | 23      | 16      | -       | -       | -32     | 58      | 18      | 17      |
| 3002     | 8                             | 58              | 42     | 40      | 26      | 22      | 28      | 14      | -       | -       | -23     | 52      | 23      | 15      |
| 3003     | 8                             | 53              | 55     | 45      | 39      | 16      | 16      | 24      | -40     | 56      | -       | 23      | 11      | 14      |
| 3004     | 10                            | 48              | 46     | 27      | 36      | 29      | 21      | 27      | -42     | 54      | -       | 21      | 10      | 22      |
| 3005     | 6                             | 51              | 40     | 42      | 35      | 23      | 23      | 31      | -34     | 56      | -       | 20      | 27      | 18      |
| 3006     | 14                            | 32 <sup>a</sup> | -      | -       | -       | -       | -       | -       | -       | -       | -       | -       | -       | -       |
| 3007     | 9                             | 32 <sup>a</sup> | -      | -       | -       | -       | -       | -       | -       | -       | -       | -       | -       | -       |
| 3008     | 4                             | 58              | -      | -       | -       | -       | -       | -       | -       | -       | -       | -       | -       | -       |
| 3009     | 2                             | 49              | -      | -       | -       | -       | -       | -       | -       | -       | -       | -       | -       | -       |
| 3010     | 2                             | 48              | -      | -       | -       | -       | -       | -       | -       | -       | -       | -       | -       | -       |
| 3011     | 7                             | 43              | 30     | 30      | -5      | -       | -       | -       | -       | -       | -       | -       | -       | -       |
| 3012     | 3                             | 42              | 40     | 22      | -4      | -       | -       | -       | -       | -       | -       | -       | -       | -       |
| 3013     | 8                             | 63              | 49     | 38      | 2       | -       | -       | -       | -       | -       | -       | -       | -       | -       |
| 3014     | 20                            | 67              | 67     | 50      | 3       | -       | -       | -       | -       | -       | -       | -       | -       | -       |
| 3015     | 12                            | 51              | 36     | 38      | 7       | -       | -       | -       | -       | -       | -       | -       | -       | -       |

<sup>a</sup> Day 8 body weight recorded was fasted, necropsy weight.

2759-001  
A Single Dose Toxicity Study of Test Article Administered by Intrathecal Injection in Rats

Individual Body Weight Change Values, g

Sex: Male Body Weight Change

| Mid Dose | Day(s)<br>Relative<br>to Start |
|----------|--------------------------------|
|          | 85 → 91                        |
| 3001     | -21                            |
| 3002     | -24                            |
| 3003     | -12                            |
| 3004     | -9                             |
| 3005     | -13                            |
| 3006     | -                              |
| 3007     | -                              |
| 3008     | -                              |
| 3009     | -                              |
| 3010     | -                              |
| 3011     | -                              |
| 3012     | -                              |
| 3013     | -                              |
| 3014     | -                              |
| 3015     | -                              |

---





2759-001  
A Single Dose Toxicity Study of Test Article Administered by Intrathecal Injection in Rats

Individual Body Weight Change Values, g

Sex: Male Body Weight Change

| High Dose | Day(s) Relative to Start Date |         |
|-----------|-------------------------------|---------|
|           | 78 → 85                       | 85 → 91 |
| 4001      | 19                            | -19     |
| 4002      | 28                            | -22     |
| 4003      | 12                            | -5      |
| 4004      | 17                            | -12     |
| 4005      | 17                            | -12     |
| 4006      | -                             | -       |
| 4007      | -                             | -       |
| 4008      | -                             | -       |
| 4009      | -                             | -       |
| 4010      | -                             | -       |
| 4011      | -                             | -       |
| 4012      | -                             | -       |
| 4013      | -                             | -       |
| 4014      | -                             | -       |
| 4015      | -                             | -       |

---

2759-001  
A Single Dose Toxicity Study of Test Article Administered by Intrathecal Injection in Rats

Individual Body Weight Change Values, g

Sex: Female Body Weight Change

| Vehicle | Day(s) Relative to Start Date |                 |        |         |         |         |         |         |         |         |         |         |         |         |
|---------|-------------------------------|-----------------|--------|---------|---------|---------|---------|---------|---------|---------|---------|---------|---------|---------|
|         | -1 → 1                        | 1 → 8           | 8 → 15 | 15 → 22 | 22 → 29 | 29 → 36 | 36 → 43 | 43 → 50 | 50 → 57 | 57 → 64 | 50 → 64 | 64 → 71 | 71 → 78 | 78 → 85 |
| 1501    | -2                            | 30              | 16     | 23      | 21      | 3       | -4      | 21      | -       | -       | 12      | -14     | 6       | -9      |
| 1502    | 4                             | 30              | 23     | 15      | 8       | 10      | 11      | 4       | -       | -       | 10      | 4       | 9       | -3      |
| 1503    | -1                            | 24              | 28     | 21      | 19      | 12      | 12      | 6       | -       | -       | 12      | 5       | 8       | 5       |
| 1504    | 9                             | 13              | 19     | 2       | 6       | 3       | -53     | 64      | 2       | 7       | -       | 1       | 3       | -4      |
| 1505    | 11                            | 16              | 16     | 8       | 20      | 17      | -77     | 77      | 19      | 10      | -       | 17      | -2      | 0       |
| 1506    | 8                             | -1 <sup>a</sup> | -      | -       | -       | -       | -       | -       | -       | -       | -       | -       | -       | -       |
| 1507    | -1                            | -5 <sup>a</sup> | -      | -       | -       | -       | -       | -       | -       | -       | -       | -       | -       | -       |
| 1508    | 5                             | -1 <sup>a</sup> | -      | -       | -       | -       | -       | -       | -       | -       | -       | -       | -       | -       |
| 1509    | 11                            | 15              | -      | -       | -       | -       | -       | -       | -       | -       | -       | -       | -       | -       |
| 1510    | 1                             | 13              | -      | -       | -       | -       | -       | -       | -       | -       | -       | -       | -       | -       |
| 1511    | -1                            | 31              | 4      | 24      | -1      | -       | -       | -       | -       | -       | -       | -       | -       | -       |
| 1512    | -1                            | 33              | 15     | 21      | -1      | -       | -       | -       | -       | -       | -       | -       | -       | -       |
| 1513    | -3                            | 28              | 18     | 17      | -15     | -       | -       | -       | -       | -       | -       | -       | -       | -       |
| 1514    | 10                            | 19              | 17     | 22      | -4      | -       | -       | -       | -       | -       | -       | -       | -       | -       |
| 1515    | -5                            | 26              | 18     | 10      | -7      | -       | -       | -       | -       | -       | -       | -       | -       | -       |

<sup>a</sup> Day 8 body weight recorded was fasted, necropsy weight.

2759-001  
A Single Dose Toxicity Study of Test Article Administered by Intrathecal Injection in Rats

Individual Body Weight Change Values, g

Sex: Female Body Weight Change

| Vehicle | Day(s)<br>Relative<br>to Start |
|---------|--------------------------------|
|         | 85 → 91                        |
| 1501    | 4                              |
| 1502    | -5                             |
| 1503    | -22                            |
| 1504    | -1                             |
| 1505    | -21                            |
| 1506    | -                              |
| 1507    | -                              |
| 1508    | -                              |
| 1509    | -                              |
| 1510    | -                              |
| 1511    | -                              |
| 1512    | -                              |
| 1513    | -                              |
| 1514    | -                              |
| 1515    | -                              |

---

2759-001  
A Single Dose Toxicity Study of Test Article Administered by Intrathecal Injection in Rats

Individual Body Weight Change Values, g

Sex: Female Body Weight Change

| Low Dose | Day(s) Relative to Start Date |                 |        |         |         |         |         |         |         |         |         |         |         |         |
|----------|-------------------------------|-----------------|--------|---------|---------|---------|---------|---------|---------|---------|---------|---------|---------|---------|
|          | -1 → 1                        | 1 → 8           | 8 → 15 | 15 → 22 | 22 → 29 | 29 → 36 | 36 → 43 | 43 → 50 | 50 → 60 | 60 → 64 | 50 → 64 | 64 → 71 | 71 → 78 | 78 → 85 |
| 2501     | 1                             | 29              | 20     | 12      | 14      | -6      | 13      | 20      | -       | -       | -14     | 29      | 9       | 18      |
| 2502     | 1                             | 31              | 17     | 14      | 6       | 7       | 8       | 12      | -       | -       | -8      | 37      | 3       | 14      |
| 2503     | -3                            | 18              | 21     | 4       | 9       | 12      | 1       | 9       | -4      | 6       | -       | 7       | 9       | -6      |
| 2504     | -1                            | 9               | 14     | -5      | 18      | 14      | -4      | -3      | 21      | -8      | -       | 7       | -2      | 9       |
| 2505     | 1                             | 21              | 18     | 0       | 16      | 15      | -3      | -3      | 21      | -6      | -       | 4       | 7       | 7       |
| 2506     | 0                             | 13 <sup>a</sup> | -      | -       | -       | -       | -       | -       | -       | -       | -       | -       | -       | -       |
| 2507     | 1                             | 8 <sup>a</sup>  | -      | -       | -       | -       | -       | -       | -       | -       | -       | -       | -       | -       |
| 2508     | 1                             | 11              | -      | -       | -       | -       | -       | -       | -       | -       | -       | -       | -       | -       |
| 2509     | 0                             | 5               | -      | -       | -       | -       | -       | -       | -       | -       | -       | -       | -       | -       |
| 2510     | -3                            | 12              | -      | -       | -       | -       | -       | -       | -       | -       | -       | -       | -       | -       |
| 2511     | 4                             | 12              | 15     | 9       | -10     | -       | -       | -       | -       | -       | -       | -       | -       | -       |
| 2512     | 2                             | 32              | 20     | 6       | -5      | -       | -       | -       | -       | -       | -       | -       | -       | -       |
| 2513     | 1                             | 17              | 8      | 10      | -4      | -       | -       | -       | -       | -       | -       | -       | -       | -       |
| 2514     | -3                            | 21              | 20     | 17      | -24     | -       | -       | -       | -       | -       | -       | -       | -       | -       |
| 2515     | 3                             | 23              | 13     | 11      | -5      | -       | -       | -       | -       | -       | -       | -       | -       | -       |

<sup>a</sup> Day 8 body weight recorded was fasted, necropsy weight.

2759-001  
A Single Dose Toxicity Study of Test Article Administered by Intrathecal Injection in Rats

Individual Body Weight Change Values, g

Sex: Female Body Weight Change

| Low Dose | Day(s)<br>Relative<br>to Start |
|----------|--------------------------------|
|          | 85 → 91                        |
| 2501     | -24                            |
| 2502     | -19                            |
| 2503     | -5                             |
| 2504     | -4                             |
| 2505     | -9                             |
| 2506     | -                              |
| 2507     | -                              |
| 2508     | -                              |
| 2509     | -                              |
| 2510     | -                              |
| 2511     | -                              |
| 2512     | -                              |
| 2513     | -                              |
| 2514     | -                              |
| 2515     | -                              |

---

2759-001  
A Single Dose Toxicity Study of Test Article Administered by Intrathecal Injection in Rats

Individual Body Weight Change Values, g

Sex: Female Body Weight Change

| Mid Dose | Day(s) Relative to Start Date |                |        |         |         |         |         |         |         |         |         |         |         |         |
|----------|-------------------------------|----------------|--------|---------|---------|---------|---------|---------|---------|---------|---------|---------|---------|---------|
|          | -1 → 1                        | 1 → 8          | 8 → 15 | 15 → 22 | 22 → 29 | 29 → 36 | 36 → 43 | 43 → 50 | 50 → 57 | 57 → 64 | 50 → 64 | 64 → 71 | 71 → 78 | 78 → 85 |
| 3501     | 4                             | 30             | 16     | 17      | -1      | 31      | 10      | -1      | -       | -       | 10      | 2       | 7       | 8       |
| 3502     | 5                             | 23             | 29     | 20      | 16      | 2       | -2      | 21      | -       | -       | 17      | -3      | 7       | 10      |
| 3503     | 8                             | 22             | 20     | 0       | 9       | 3       | 6       | 9       | 14      | -6      | -       | 5       | 8       | -2      |
| 3504     | 12                            | 12             | 14     | 13      | 11      | 8       | -8      | 15      | 4       | 10      | -       | -12     | 3       | 6       |
| 3505     | 2                             | 24             | 15     | 17      | 0       | 8       | 11      | 10      | -1      | 2       | -       | 1       | 4       | 4       |
| 3506     | 7                             | 6 <sup>a</sup> | -      | -       | -       | -       | -       | -       | -       | -       | -       | -       | -       | -       |
| 3507     | -4                            | 6 <sup>a</sup> | -      | -       | -       | -       | -       | -       | -       | -       | -       | -       | -       | -       |
| 3508     | 2                             | 8              | -      | -       | -       | -       | -       | -       | -       | -       | -       | -       | -       | -       |
| 3509     | 4                             | 15             | -      | -       | -       | -       | -       | -       | -       | -       | -       | -       | -       | -       |
| 3510     | 9                             | 12             | -      | -       | -       | -       | -       | -       | -       | -       | -       | -       | -       | -       |
| 3511     | 0                             | 23             | 7      | 18      | 3       | -       | -       | -       | -       | -       | -       | -       | -       | -       |
| 3512     | -7                            | 27             | 7      | 8       | -8      | -       | -       | -       | -       | -       | -       | -       | -       | -       |
| 3513     | -2                            | 26             | 5      | 20      | -4      | -       | -       | -       | -       | -       | -       | -       | -       | -       |
| 3514     | 6                             | 18             | 16     | 9       | -12     | -       | -       | -       | -       | -       | -       | -       | -       | -       |
| 3515     | -4                            | 37             | 18     | 15      | -12     | -       | -       | -       | -       | -       | -       | -       | -       | -       |

<sup>a</sup> Day 8 body weight recorded was fasted, necropsy weight.

2759-001  
A Single Dose Toxicity Study of Test Article Administered by Intrathecal Injection in Rats

Individual Body Weight Change Values, g

Sex: Female Body Weight Change

| Mid Dose | Day(s)<br>Relative<br>to Start |
|----------|--------------------------------|
|          | 85 → 91                        |
| 3501     | -14                            |
| 3502     | -14                            |
| 3503     | -7                             |
| 3504     | -14                            |
| 3505     | -8                             |
| 3506     | -                              |
| 3507     | -                              |
| 3508     | -                              |
| 3509     | -                              |
| 3510     | -                              |
| 3511     | -                              |
| 3512     | -                              |
| 3513     | -                              |
| 3514     | -                              |
| 3515     | -                              |

---



2759-001  
A Single Dose Toxicity Study of Test Article Administered by Intrathecal Injection in Rats

Individual Body Weight Change Values, g

Sex: Female Body Weight Change

| High Dose | Day(s) Relative to Start Date |                  |        |         |         |         |         |         |         |         |         |         |         |         |
|-----------|-------------------------------|------------------|--------|---------|---------|---------|---------|---------|---------|---------|---------|---------|---------|---------|
|           | -1 → 1                        | 1 → 8            | 8 → 15 | 15 → 22 | 22 → 29 | 29 → 36 | 36 → 43 | 43 → 50 | 50 → 60 | 60 → 64 | 50 → 64 | 64 → 71 | 71 → 78 | 78 → 85 |
| 4501      | 6                             | 31               | 14     | 18      | 19      | -2      | 29      | -12     | -       | -       | -5      | 13      | 17      | 29      |
| 4502      | 3                             | 26               | 20     | 20      | 23      | 11      | 16      | 3       | -       | -       | -11     | 5       | 36      | 20      |
| 4503      | 4                             | 20               | 19     | 20      | 19      | 4       | 1       | 22      | 2       | -2      | -       | 1       | 6       | 6       |
| 4504      | 3                             | 23               | 19     | 23      | 14      | 18      | 7       | 14      | 9       | 3       | -       | 0       | 16      | 1       |
| 4505      | -2                            | 25               | 30     | 9       | 3       | 20      | 4       | 8       | 13      | -3      | -       | 1       | 8       | 4       |
| 4506      | 9                             | -9 <sup>a</sup>  | -      | -       | -       | -       | -       | -       | -       | -       | -       | -       | -       | -       |
| 4507      | 3                             | -14 <sup>a</sup> | -      | -       | -       | -       | -       | -       | -       | -       | -       | -       | -       | -       |
| 4508      | -2                            | 12               | -      | -       | -       | -       | -       | -       | -       | -       | -       | -       | -       | -       |
| 4509      | -2                            | 13               | -      | -       | -       | -       | -       | -       | -       | -       | -       | -       | -       | -       |
| 4510      | -1                            | 6                | -      | -       | -       | -       | -       | -       | -       | -       | -       | -       | -       | -       |
| 4511      | 6                             | 36               | 22     | 8       | -13     | -       | -       | -       | -       | -       | -       | -       | -       | -       |
| 4512      | 5                             | 18               | 20     | 23      | -13     | -       | -       | -       | -       | -       | -       | -       | -       | -       |
| 4513      | 5                             | 20               | 16     | 12      | -17     | -       | -       | -       | -       | -       | -       | -       | -       | -       |
| 4514      | 2                             | 20               | 16     | 30      | -4      | -       | -       | -       | -       | -       | -       | -       | -       | -       |
| 4515      | -1                            | 20               | 9      | -5      | 5       | -       | -       | -       | -       | -       | -       | -       | -       | -       |

<sup>a</sup>Day 8 body weight recorded was fasted, necropsy weight.

2759-001  
A Single Dose Toxicity Study of Test Article Administered by Intrathecal Injection in Rats

Individual Body Weight Change Values, g

Sex: Female Body Weight Change

| High Dose | Day(s)<br>Relative<br>to Start |
|-----------|--------------------------------|
|           | 85 → 91                        |
| 4501      | -21                            |
| 4502      | -21                            |
| 4503      | -21                            |
| 4504      | -12                            |
| 4505      | -14                            |
| 4506      | -                              |
| 4507      | -                              |
| 4508      | -                              |
| 4509      | -                              |
| 4510      | -                              |
| 4511      | -                              |
| 4512      | -                              |
| 4513      | -                              |
| 4514      | -                              |
| 4515      | -                              |

---

Appendix 7  
Individual Caged Food Consumption Values

2759-001  
 A Single Dose Toxicity Study of Test Article Administered by Intrathecal Injection in Rats

Individual Caged Food Consumption Values

Sex: Male Daily Food Consumption/Animal (g)

| Vehicle | No. in Cage | Week(s) Relative to Animal Start Date |       |       |    |       |       |       |
|---------|-------------|---------------------------------------|-------|-------|----|-------|-------|-------|
|         |             | 1                                     | 1 → 2 | 2 → 3 | 4  | 3 → 4 | 4 → 5 | 5 → 6 |
| 1       | 2           | -                                     | 25    | 26    | -  | 23    | 25    | 24    |
| 2       | 3           | -                                     | 25    | 26    | -  | 26    | 26    | 27    |
| 3       | 2           | 30                                    | -     | -     | -  | -     | -     | -     |
| 4       | 3           | 30                                    | -     | -     | -  | -     | -     | -     |
| 5       | 3           | -                                     | 29    | 29    | 31 | 29    | -     | -     |
| 6       | 2           | -                                     | 29    | 29    | 28 | 30    | -     | -     |

\_\_\_\_\_

2759-001  
 A Single Dose Toxicity Study of Test Article Administered by Intrathecal Injection in Rats

Individual Caged Food Consumption Values

Sex: Male Daily Food Consumption/Animal (g)

| Vehicle | No. in Cage | Week(s) Relative to Animal Start Date |       |       |        |         |         |    |
|---------|-------------|---------------------------------------|-------|-------|--------|---------|---------|----|
|         |             | 6 → 7                                 | 7 → 8 | 8 → 9 | 9 → 10 | 10 → 11 | 11 → 12 | 13 |
| 1       | 2           | 25                                    | 25    | 26    | 23     | 26      | 26      | 25 |
| 2       | 3           | 27                                    | 28    | 28    | 28     | 27      | 28      | 28 |
| 3       | 2           | -                                     | -     | -     | -      | -       | -       | -  |
| 4       | 3           | -                                     | -     | -     | -      | -       | -       | -  |
| 5       | 3           | -                                     | -     | -     | -      | -       | -       | -  |
| 6       | 2           | -                                     | -     | -     | -      | -       | -       | -  |

\_\_\_\_\_

2759-001  
A Single Dose Toxicity Study of Test Article Administered by Intrathecal Injection in Rats

Individual Caged Food Consumption Values

Sex: Male    Daily Food Consumption/Animal (g)

| Vehicle | No. in Cage | Week(s) Relative to Animal Start Date |
|---------|-------------|---------------------------------------|
|         |             | 12 → 13                               |
| 1       | 2           | 26                                    |
| 2       | 3           | 28                                    |
| 3       | 2           | -                                     |
| 4       | 3           | -                                     |
| 5       | 3           | -                                     |
| 6       | 2           | -                                     |

|  |
|--|
|  |
|--|

2759-001  
 A Single Dose Toxicity Study of Test Article Administered by Intrathecal Injection in Rats

Individual Caged Food Consumption Values

Sex: Male Daily Food Consumption/Animal (g)

| Low Dose | No. in Cage | Week(s) Relative to Animal Start Date |       |       |    |       |       |       |
|----------|-------------|---------------------------------------|-------|-------|----|-------|-------|-------|
|          |             | 1                                     | 1 → 2 | 2 → 3 | 4  | 3 → 4 | 4 → 5 | 5 → 6 |
| 13       | 3           | -                                     | 23    | 33    | -  | 23    | 28    | 24    |
| 14       | 2           | -                                     | 30    | 14    | -  | 33    | 31    | 30    |
| 15       | 3           | 28                                    | -     | -     | -  | -     | -     | -     |
| 16       | 2           | 29                                    | -     | -     | -  | -     | -     | -     |
| 17       | 3           | -                                     | 29    | 29    | 30 | 29    | -     | -     |
| 18       | 2           | -                                     | 29    | 29    | 28 | 29    | -     | -     |

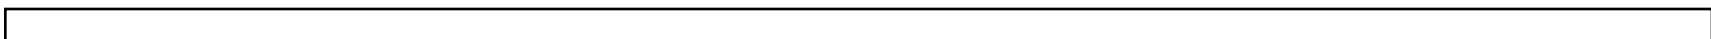

2759-001  
 A Single Dose Toxicity Study of Test Article Administered by Intrathecal Injection in Rats

Individual Caged Food Consumption Values

Sex: Male Daily Food Consumption/Animal (g)

| Low Dose | No. in Cage | Week(s) Relative to Animal Start Date |       |       |        |         |         |    |
|----------|-------------|---------------------------------------|-------|-------|--------|---------|---------|----|
|          |             | 6 → 7                                 | 7 → 8 | 8 → 9 | 9 → 10 | 10 → 11 | 11 → 12 | 13 |
| 13       | 3           | 25                                    | 24    | 26    | 26     | 26      | 26      | 27 |
| 14       | 2           | 30                                    | 29    | 30    | 31     | 30      | 30      | 28 |
| 15       | 3           | -                                     | -     | -     | -      | -       | -       | -  |
| 16       | 2           | -                                     | -     | -     | -      | -       | -       | -  |
| 17       | 3           | -                                     | -     | -     | -      | -       | -       | -  |
| 18       | 2           | -                                     | -     | -     | -      | -       | -       | -  |

\_\_\_\_\_



2759-001  
 A Single Dose Toxicity Study of Test Article Administered by Intrathecal Injection in Rats

Individual Caged Food Consumption Values

Sex: Male    Daily Food Consumption/Animal (g)

| Low Dose | No. in Cage | Week(s) Relative to Animal Start Date |
|----------|-------------|---------------------------------------|
|          |             | 12 → 13                               |
| 13       | 3           | 26                                    |
| 14       | 2           | 25                                    |
| 15       | 3           | -                                     |
| 16       | 2           | -                                     |
| 17       | 3           | -                                     |
| 18       | 2           | -                                     |

|  |
|--|
|  |
|--|

2759-001  
A Single Dose Toxicity Study of Test Article Administered by Intrathecal Injection in Rats

Individual Caged Food Consumption Values

Sex: Male Daily Food Consumption/Animal (g)

| Mid Dose | No. in Cage | Week(s) Relative to Animal Start Date |       |       |    |       |       |       |
|----------|-------------|---------------------------------------|-------|-------|----|-------|-------|-------|
|          |             | 1                                     | 1 → 2 | 2 → 3 | 4  | 3 → 4 | 4 → 5 | 5 → 6 |
| 25       | 2           | -                                     | 26    | 27    | -  | 27    | 27    | 28    |
| 26       | 3           | -                                     | 27    | 28    | -  | 28    | 29    | 29    |
| 27       | 2           | 29                                    | -     | -     | -  | -     | -     | -     |
| 28       | 3           | 29                                    | -     | -     | -  | -     | -     | -     |
| 29       | 3           | -                                     | 27    | 28    | 27 | 28    | -     | -     |
| 30       | 2           | -                                     | 27    | 29    | 29 | 28    | -     | -     |

\_\_\_\_\_

2759-001  
 A Single Dose Toxicity Study of Test Article Administered by Intrathecal Injection in Rats

Individual Caged Food Consumption Values

Sex: Male Daily Food Consumption/Animal (g)

| Mid Dose | No. in Cage | Week(s) Relative to Animal Start Date |       |       |        |         |         |    |
|----------|-------------|---------------------------------------|-------|-------|--------|---------|---------|----|
|          |             | 6 → 7                                 | 7 → 8 | 8 → 9 | 9 → 10 | 10 → 11 | 11 → 12 | 13 |
| 25       | 2           | 28                                    | 27    | 28    | 25     | 29      | 30      | 29 |
| 26       | 3           | 29                                    | 29    | 29    | 25     | 31      | 30      | 31 |
| 27       | 2           | -                                     | -     | -     | -      | -       | -       | -  |
| 28       | 3           | -                                     | -     | -     | -      | -       | -       | -  |
| 29       | 3           | -                                     | -     | -     | -      | -       | -       | -  |
| 30       | 2           | -                                     | -     | -     | -      | -       | -       | -  |

\_\_\_\_\_

2759-001  
A Single Dose Toxicity Study of Test Article Administered by Intrathecal Injection in Rats

Individual Caged Food Consumption Values

Sex: Male    Daily Food Consumption/Animal (g)

| Mid Dose | No. in Cage | Week(s) Relative to Animal Start Date |
|----------|-------------|---------------------------------------|
|          |             | 12 → 13                               |
| 25       | 2           | 29                                    |
| 26       | 3           | 31                                    |
| 27       | 2           | -                                     |
| 28       | 3           | -                                     |
| 29       | 3           | -                                     |
| 30       | 2           | -                                     |

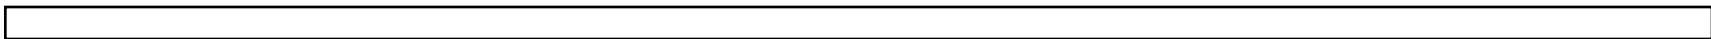

2759-001  
 A Single Dose Toxicity Study of Test Article Administered by Intrathecal Injection in Rats

Individual Caged Food Consumption Values

Sex: Male Daily Food Consumption/Animal (g)

| High Dose | No. in Cage | Week(s) Relative to Animal Start Date |       |       |    |       |       |       |
|-----------|-------------|---------------------------------------|-------|-------|----|-------|-------|-------|
|           |             | 1                                     | 1 → 2 | 2 → 3 | 4  | 3 → 4 | 4 → 5 | 5 → 6 |
| 37        | 3           | -                                     | 26    | 27    | -  | 26    | 27    | 27    |
| 38        | 2           | -                                     | 27    | 27    | -  | 31    | 30    | 32    |
| 39        | 3           | 28                                    | -     | -     | -  | -     | -     | -     |
| 40        | 2           | 29                                    | -     | -     | -  | -     | -     | -     |
| 41        | 2           | -                                     | 33    | 36    | 38 | 37    | -     | -     |
| 42        | 3           | -                                     | 27    | 28    | 27 | 27    | -     | -     |

\_\_\_\_\_

2759-001  
 A Single Dose Toxicity Study of Test Article Administered by Intrathecal Injection in Rats

Individual Caged Food Consumption Values

Sex: Male Daily Food Consumption/Animal (g)

| High Dose | No. in Cage | Week(s) Relative to Animal Start Date |       |       |        |         |         |    |
|-----------|-------------|---------------------------------------|-------|-------|--------|---------|---------|----|
|           |             | 6 → 7                                 | 7 → 8 | 8 → 9 | 9 → 10 | 10 → 11 | 11 → 12 | 13 |
| 37        | 3           | 27                                    | 28    | 27    | 29     | 27      | 27      | 27 |
| 38        | 2           | 32                                    | 32    | 33    | 32     | 32      | 33      | 32 |
| 39        | 3           | -                                     | -     | -     | -      | -       | -       | -  |
| 40        | 2           | -                                     | -     | -     | -      | -       | -       | -  |
| 41        | 2           | -                                     | -     | -     | -      | -       | -       | -  |
| 42        | 3           | -                                     | -     | -     | -      | -       | -       | -  |

\_\_\_\_\_

2759-001  
A Single Dose Toxicity Study of Test Article Administered by Intrathecal Injection in Rats

Individual Caged Food Consumption Values

Sex: Male    Daily Food Consumption/Animal (g)

| High Dose | No. in Cage | Week(s) Relative to Animal Start Date |
|-----------|-------------|---------------------------------------|
|           |             | 12 → 13                               |
| 37        | 3           | 27                                    |
| 38        | 2           | 31                                    |
| 39        | 3           | -                                     |
| 40        | 2           | -                                     |
| 41        | 2           | -                                     |
| 42        | 3           | -                                     |

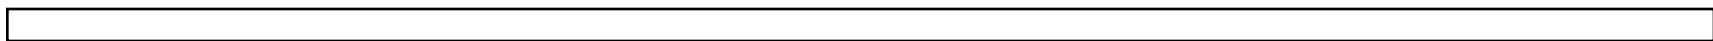

2759-001  
A Single Dose Toxicity Study of Test Article Administered by Intrathecal Injection in Rats

Individual Caged Food Consumption Values

Sex: Female Daily Food Consumption/Animal (g)

| Vehicle | No. in Cage | Week(s) Relative to Animal Start Date |       |       |    |       |       |       |
|---------|-------------|---------------------------------------|-------|-------|----|-------|-------|-------|
|         |             | 1                                     | 1 → 2 | 2 → 3 | 4  | 3 → 4 | 4 → 5 | 5 → 6 |
| 7       | 3           | -                                     | 18    | 20    | -  | 20    | 20    | 19    |
| 8       | 2           | -                                     | 18    | 19    | -  | 18    | 19    | 19    |
| 9       | 3           | 19                                    | -     | -     | -  | -     | -     | -     |
| 10      | 2           | 19                                    | -     | -     | -  | -     | -     | -     |
| 11      | 2           | -                                     | 20    | 20    | 20 | 21    | -     | -     |
| 12      | 3           | -                                     | 17    | 19    | 19 | 18    | -     | -     |





2759-001  
 A Single Dose Toxicity Study of Test Article Administered by Intrathecal Injection in Rats

Individual Caged Food Consumption Values

Sex: Female Daily Food Consumption/Animal (g)

| Vehicle | No. in Cage | Week(s) Relative to Animal Start Date |       |       |        |         |         |    |
|---------|-------------|---------------------------------------|-------|-------|--------|---------|---------|----|
|         |             | 6 → 7                                 | 7 → 8 | 8 → 9 | 9 → 10 | 10 → 11 | 11 → 12 | 13 |
| 7       | 3           | 19                                    | 18    | 19    | 19     | 17      | 18      | 20 |
| 8       | 2           | 7                                     | 23    | 21    | 19     | 18      | 20      | 17 |
| 9       | 3           | -                                     | -     | -     | -      | -       | -       | -  |
| 10      | 2           | -                                     | -     | -     | -      | -       | -       | -  |
| 11      | 2           | -                                     | -     | -     | -      | -       | -       | -  |
| 12      | 3           | -                                     | -     | -     | -      | -       | -       | -  |

\_\_\_\_\_

2759-001  
A Single Dose Toxicity Study of Test Article Administered by Intrathecal Injection in Rats

Individual Caged Food Consumption Values

Sex: Female    Daily Food Consumption/Animal (g)

| Vehicle | No. in Cage | Week(s) Relative to Animal Start Date |
|---------|-------------|---------------------------------------|
|         |             | 12 → 13                               |
| 7       | 3           | 17                                    |
| 8       | 2           | 17                                    |
| 9       | 3           | -                                     |
| 10      | 2           | -                                     |
| 11      | 2           | -                                     |
| 12      | 3           | -                                     |

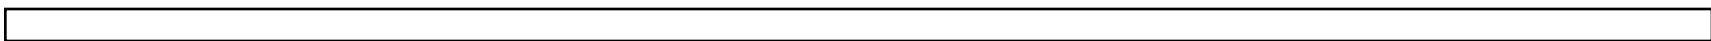

2759-001  
 A Single Dose Toxicity Study of Test Article Administered by Intrathecal Injection in Rats

Individual Caged Food Consumption Values

Sex: Female Daily Food Consumption/Animal (g)

| Low Dose | No. in Cage | Week(s) Relative to Animal Start Date |       |       |    |       |       |       |
|----------|-------------|---------------------------------------|-------|-------|----|-------|-------|-------|
|          |             | 1                                     | 1 → 2 | 2 → 3 | 4  | 3 → 4 | 4 → 5 | 5 → 6 |
| 19       | 2           | -                                     | 17    | 6     | -  | 19    | 19    | 19    |
| 20       | 3           | -                                     | 18    | 20    | -  | 18    | 21    | 21    |
| 21       | 2           | 19                                    | -     | -     | -  | -     | -     | -     |
| 22       | 3           | 17                                    | -     | -     | -  | -     | -     | -     |
| 23       | 3           | -                                     | 16    | 17    | 16 | 17    | -     | -     |
| 24       | 2           | -                                     | 18    | 18    | 18 | 25    | -     | -     |

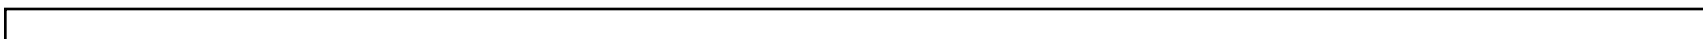

2759-001  
A Single Dose Toxicity Study of Test Article Administered by Intrathecal Injection in Rats

Individual Caged Food Consumption Values

Sex: Female Daily Food Consumption/Animal (g)

| Low Dose | No. in Cage | Week(s) Relative to Animal Start Date |       |       |        |         |         |    |
|----------|-------------|---------------------------------------|-------|-------|--------|---------|---------|----|
|          |             | 6 → 7                                 | 7 → 8 | 8 → 9 | 9 → 10 | 10 → 11 | 11 → 12 | 13 |
| 19       | 2           | 9 <sup>!</sup>                        | 24    | 21    | 18     | 21      | 20      | 19 |
| 20       | 3           | 19                                    | 19    | 22    | 19     | 19      | 20      | 20 |
| 21       | 2           | -                                     | -     | -     | -      | -       | -       | -  |
| 22       | 3           | -                                     | -     | -     | -      | -       | -       | -  |
| 23       | 3           | -                                     | -     | -     | -      | -       | -       | -  |
| 24       | 2           | -                                     | -     | -     | -      | -       | -       | -  |

! = Result Comment

2759-001  
A Single Dose Toxicity Study of Test Article Administered by Intrathecal Injection in Rats

Individual Caged Food Consumption Values

Sex: Female    Daily Food Consumption/Animal (g)

| Low Dose | No. in Cage | Week(s) Relative to Animal Start Date |    |
|----------|-------------|---------------------------------------|----|
|          |             | 12 → 13                               |    |
|          | 19          | 2                                     | 20 |
|          | 20          | 3                                     | 21 |
|          | 21          | 2                                     | -  |
|          | 22          | 3                                     | -  |
|          | 23          | 3                                     | -  |
|          | 24          | 2                                     | -  |



2759-001  
A Single Dose Toxicity Study of Test Article Administered by Intrathecal Injection in Rats

Individual Caged Food Consumption Values

Sex: Female Daily Food Consumption/Animal (g)

| Mid Dose | No. in Cage | Week(s) Relative to Animal Start Date |       |       |    |       |       |       |
|----------|-------------|---------------------------------------|-------|-------|----|-------|-------|-------|
|          |             | 1                                     | 1 → 2 | 2 → 3 | 4  | 3 → 4 | 4 → 5 | 5 → 6 |
| 31       | 2           | -                                     | 18    | 19    | -  | 20    | 20    | 21    |
| 32       | 3           | -                                     | 18    | 19    | -  | 18    | 18    | 20    |
| 33       | 2           | 18                                    | -     | -     | -  | -     | -     | -     |
| 34       | 3           | 20                                    | -     | -     | -  | -     | -     | -     |
| 35       | 3           | -                                     | 18    | 17    | 17 | 18    | -     | -     |
| 36       | 2           | -                                     | 19    | 20    | 18 | 19    | -     | -     |



2759-001  
 A Single Dose Toxicity Study of Test Article Administered by Intrathecal Injection in Rats

Individual Caged Food Consumption Values

Sex: Female Daily Food Consumption/Animal (g)

| Mid Dose | No. in Cage | Week(s) Relative to Animal Start Date |       |       |        |         |         |    |
|----------|-------------|---------------------------------------|-------|-------|--------|---------|---------|----|
|          |             | 6 → 7                                 | 7 → 8 | 8 → 9 | 9 → 10 | 10 → 11 | 11 → 12 | 13 |
| 31       | 2           | 19                                    | 18    | 20    | 19     | 18      | 19      | 22 |
| 32       | 3           | 19                                    | 19    | 20    | 19     | 18      | 19      | 20 |
| 33       | 2           | -                                     | -     | -     | -      | -       | -       | -  |
| 34       | 3           | -                                     | -     | -     | -      | -       | -       | -  |
| 35       | 3           | -                                     | -     | -     | -      | -       | -       | -  |
| 36       | 2           | -                                     | -     | -     | -      | -       | -       | -  |

\_\_\_\_\_

2759-001  
 A Single Dose Toxicity Study of Test Article Administered by Intrathecal Injection in Rats

Individual Caged Food Consumption Values

Sex: Female    Daily Food Consumption/Animal (g)

| Mid Dose | No. in Cage | Week(s) Relative to Animal Start Date |
|----------|-------------|---------------------------------------|
|          |             | 12 → 13                               |
| 31       | 2           | 20                                    |
| 32       | 3           | 18                                    |
| 33       | 2           | -                                     |
| 34       | 3           | -                                     |
| 35       | 3           | -                                     |
| 36       | 2           | -                                     |

|  |
|--|
|  |
|--|



2759-001  
 A Single Dose Toxicity Study of Test Article Administered by Intrathecal Injection in Rats

Individual Caged Food Consumption Values

Sex: Female Daily Food Consumption/Animal (g)

| High Dose | No. in Cage | Week(s) Relative to Animal Start Date |       |       |    |       |       |       |
|-----------|-------------|---------------------------------------|-------|-------|----|-------|-------|-------|
|           |             | 1                                     | 1 → 2 | 2 → 3 | 4  | 3 → 4 | 4 → 5 | 5 → 6 |
| 43        | 2           | -                                     | 19    | 21    | -  | 20    | 21    | 20    |
| 44        | 3           | -                                     | 18    | 21    | -  | 20    | 21    | 20    |
| 45        | 2           | 16                                    | -     | -     | -  | -     | -     | -     |
| 46        | 3           | 19                                    | -     | -     | -  | -     | -     | -     |
| 47        | 3           | -                                     | 18    | 20    | 16 | 19    | -     | -     |
| 48        | 2           | -                                     | 17    | 19    | 19 | 19    | -     | -     |



2759-001  
A Single Dose Toxicity Study of Test Article Administered by Intrathecal Injection in Rats

Individual Caged Food Consumption Values

Sex: Female Daily Food Consumption/Animal (g)

| High Dose | No. in Cage | Week(s) Relative to Animal Start Date |       |       |        |         |         |    |
|-----------|-------------|---------------------------------------|-------|-------|--------|---------|---------|----|
|           |             | 6 → 7                                 | 7 → 8 | 8 → 9 | 9 → 10 | 10 → 11 | 11 → 12 | 13 |
| 43        | 2           | 23                                    | 20    | 21    | 19     | 8       | 28      | 22 |
| 44        | 3           | 20                                    | 20    | 20    | 19     | 20      | 19      | 18 |
| 45        | 2           | -                                     | -     | -     | -      | -       | -       | -  |
| 46        | 3           | -                                     | -     | -     | -      | -       | -       | -  |
| 47        | 3           | -                                     | -     | -     | -      | -       | -       | -  |
| 48        | 2           | -                                     | -     | -     | -      | -       | -       | -  |

\_\_\_\_\_

2759-001  
A Single Dose Toxicity Study of Test Article Administered by Intrathecal Injection in Rats

Individual Caged Food Consumption Values

Sex: Female    Daily Food Consumption/Animal (g)

| High Dose | No. in Cage | Week(s) Relative to Animal Start Date |
|-----------|-------------|---------------------------------------|
|           |             | 12 → 13                               |
| 43        | 2           | 26                                    |
| 44        | 3           | 20                                    |
| 45        | 2           | -                                     |
| 46        | 3           | -                                     |
| 47        | 3           | -                                     |
| 48        | 2           | -                                     |



2759-001  
A Single Dose Toxicity Study of Test Article Administered by Intrathecal Injection in Rats

## Individual Caged Food Consumption Values

Key Page**Cage Contents**

| <u>Cage Number</u> | <u>Animal Numbers</u> |
|--------------------|-----------------------|
| 1                  | 1001, 1002            |
| 3                  | 1006, 1007            |
| 5                  | 1011, 1012, 1013      |
| 7                  | 1501, 1502, 1503      |
| 9                  | 1506, 1507, 1508      |
| 11                 | 1511, 1512            |
| 13                 | 2001, 2002, 2003      |
| 15                 | 2006, 2007, 2008      |
| 17                 | 2011, 2012, 2013      |
| 19                 | 2501, 2502            |
| 21                 | 2506, 2507            |
| 23                 | 2511, 2512, 2513      |
| 25                 | 3001, 3002            |
| 27                 | 3006, 3007            |
| 29                 | 3011, 3012, 3013      |
| 31                 | 3501, 3502            |
| 33                 | 3506, 3507            |
| 35                 | 3511, 3512, 3513      |
| 37                 | 4001, 4002, 4003      |
| 39                 | 4006, 4007, 4008      |
| 41                 | 4011, 4012            |
| 43                 | 4501, 4502            |
| 45                 | 4506, 4507            |
| 47                 | 4511, 4512, 4513      |

| <u>Cage Number</u> | <u>Animal Numbers</u> |
|--------------------|-----------------------|
| 2                  | 1003, 1004, 1005      |
| 4                  | 1008, 1009, 1010      |
| 6                  | 1014, 1015            |
| 8                  | 1504, 1505            |
| 10                 | 1509, 1510            |
| 12                 | 1513, 1514, 1515      |
| 14                 | 2004, 2005            |
| 16                 | 2009, 2010            |
| 18                 | 2014, 2015            |
| 20                 | 2503, 2504, 2505      |
| 22                 | 2508, 2509, 2510      |
| 24                 | 2514, 2515            |
| 26                 | 3003, 3004, 3005      |
| 28                 | 3008, 3009, 3010      |
| 30                 | 3014, 3015            |
| 32                 | 3503, 3504, 3505      |
| 34                 | 3508, 3509, 3510      |
| 36                 | 3514, 3515            |
| 38                 | 4004, 4005            |
| 40                 | 4009, 4010            |
| 42                 | 4013, 4014, 4015      |
| 44                 | 4503, 4504, 4505      |
| 46                 | 4508, 4509, 4510      |
| 48                 | 4514, 4515            |

Appendix 8  
Individual Rotating Rod Values

2759-001

A Single Dose Toxicity Study of Test Article Administered by Intrathecal Injection in Rats

Individual Rotating Rod Values - Male

Fall Time (sec)

| Vehicle | Day -1 (PRDO) |       |       |                | Day 28       |       |       |                | Day 90       |       |       |                |
|---------|---------------|-------|-------|----------------|--------------|-------|-------|----------------|--------------|-------|-------|----------------|
|         | Trial Number  |       |       |                | Trial Number |       |       |                | Trial Number |       |       |                |
|         | 1             | 2     | 3     | <b>Average</b> | 1            | 2     | 3     | <b>Average</b> | 1            | 2     | 3     | <b>Average</b> |
| 1001    | 47.80         | 66.75 | 36.86 | <b>50.47</b>   | -            | -     | -     | -              | 51.11        | 38.30 | 42.78 | <b>44.06</b>   |
| 1002    | 45.76         | 25.62 | 51.20 | <b>40.86</b>   | -            | -     | -     | -              | 8.22         | 4.85  | 9.67  | <b>7.58</b>    |
| 1003    | 21.68         | 17.13 | 37.22 | <b>25.34</b>   | -            | -     | -     | -              | 35.62        | 33.03 | 27.92 | <b>32.19</b>   |
| 1004    | 39.91         | 5.63  | 9.49  | <b>18.34</b>   | -            | -     | -     | -              | 2.36         | 4.93  | 2.14  | <b>3.14</b>    |
| 1005    | 71.95         | 21.76 | 57.61 | <b>50.44</b>   | -            | -     | -     | -              | 78.56        | 49.61 | 35.32 | <b>54.50</b>   |
| 1011    | 40.76         | 29.52 | 49.90 | <b>40.06</b>   | 50.34        | 68.56 | 80.29 | <b>66.40</b>   | -            | -     | -     | -              |
| 1012    | 56.33         | 20.87 | 55.51 | <b>44.24</b>   | 67.30        | 30.55 | 46.13 | <b>47.99</b>   | -            | -     | -     | -              |
| 1013    | 35.69         | 92.91 | 92.67 | <b>73.76</b>   | 59.11        | 48.49 | 96.22 | <b>67.94</b>   | -            | -     | -     | -              |
| 1014    | 39.89         | 25.58 | 60.47 | <b>41.98</b>   | 82.74        | 69.61 | 36.69 | <b>63.01</b>   | -            | -     | -     | -              |
| 1015    | 46.49         | 42.50 | 70.95 | <b>53.31</b>   | 99.39        | 58.30 | 44.87 | <b>67.52</b>   | -            | -     | -     | -              |

2759-001  
A Single Dose Toxicity Study of Test Article Administered by Intrathecal Injection in Rats

Individual Rotating Rod Values - Male

Fall Time (sec)

| Low Dose | Day -1 (PRDO) |        |       |               | Day 28       |       |       |              | Day 90       |       |       |              |
|----------|---------------|--------|-------|---------------|--------------|-------|-------|--------------|--------------|-------|-------|--------------|
|          | Trial Number  |        |       |               | Trial Number |       |       |              | Trial Number |       |       |              |
|          | 1             | 2      | 3     | Average       | 1            | 2     | 3     | Average      | 1            | 2     | 3     | Average      |
| 2001     | 44.29         | 77.24  | 45.62 | <b>55.72</b>  | -            | -     | -     | -            | 32.34        | 7.24  | 69.67 | <b>36.42</b> |
| 2002     | 59.75         | 78.95  | 86.94 | <b>75.21</b>  | -            | -     | -     | -            | 28.21        | 37.52 | 25.15 | <b>30.29</b> |
| 2003     | 54.09         | 77.33  | 47.74 | <b>59.72</b>  | -            | -     | -     | -            | 20.31        | 10.61 | 8.69  | <b>13.20</b> |
| 2004     | 45.55         | 14.52  | 61.23 | <b>40.43</b>  | -            | -     | -     | -            | 87.47        | 51.37 | 29.86 | <b>56.23</b> |
| 2005     | 109.54        | 118.47 | 95.86 | <b>107.96</b> | -            | -     | -     | -            | 82.18        | 67.07 | 36.30 | <b>61.85</b> |
| 2011     | 55.15         | 79.23  | 50.94 | <b>61.77</b>  | 42.51        | 73.91 | 72.48 | <b>62.97</b> | -            | -     | -     | -            |
| 2012     | 31.68         | 49.48  | 67.77 | <b>49.64</b>  | 41.19        | 80.25 | 26.05 | <b>49.16</b> | -            | -     | -     | -            |
| 2013     | 65.72         | 11.86  | 18.50 | <b>32.03</b>  | 74.16        | 33.62 | 77.31 | <b>61.70</b> | -            | -     | -     | -            |
| 2014     | 43.24         | 36.52  | 52.60 | <b>44.12</b>  | 69.41        | 82.42 | 83.82 | <b>78.55</b> | -            | -     | -     | -            |
| 2015     | 49.89         | 41.39  | 20.92 | <b>37.40</b>  | 68.91        | 68.78 | 71.25 | <b>69.65</b> | -            | -     | -     | -            |

2759-001

A Single Dose Toxicity Study of Test Article Administered by Intrathecal Injection in Rats

Individual Rotating Rod Values - Male

Fall Time (sec)

| Mid Dose | Day -1 (PRDO) |       |       |                | Day 28       |       |       |                | Day 90       |       |        |                |
|----------|---------------|-------|-------|----------------|--------------|-------|-------|----------------|--------------|-------|--------|----------------|
|          | Trial Number  |       |       |                | Trial Number |       |       |                | Trial Number |       |        |                |
|          | 1             | 2     | 3     | <b>Average</b> | 1            | 2     | 3     | <b>Average</b> | 1            | 2     | 3      | <b>Average</b> |
| 3001     | 95.80         | 54.34 | 91.18 | <b>80.44</b>   | -            | -     | -     | -              | 79.98        | 55.37 | 140.03 | <b>91.79</b>   |
| 3002     | 62.24         | 1.01  | 47.02 | <b>36.76</b>   | -            | -     | -     | -              | 46.65        | 62.04 | 51.14  | <b>53.28</b>   |
| 3003     | 22.20         | 46.13 | 31.26 | <b>33.20</b>   | -            | -     | -     | -              | 4.73         | 3.60  | 5.54   | <b>4.62</b>    |
| 3004     | 49.31         | 18.38 | 11.62 | <b>26.44</b>   | -            | -     | -     | -              | 50.73        | 37.28 | 48.69  | <b>45.57</b>   |
| 3005     | 54.21         | 46.24 | 33.76 | <b>44.74</b>   | -            | -     | -     | -              | 46.01        | 3.17  | 4.06   | <b>17.75</b>   |
| 3011     | 48.03         | 19.81 | 18.60 | <b>28.81</b>   | 21.51        | 79.30 | 33.57 | <b>44.79</b>   | -            | -     | -      | -              |
| 3012     | 82.52         | 56.85 | 72.37 | <b>70.58</b>   | 63.85        | 39.87 | 87.59 | <b>63.77</b>   | -            | -     | -      | -              |
| 3013     | 31.79         | 29.55 | 34.48 | <b>31.94</b>   | 28.10        | 26.27 | 62.60 | <b>38.99</b>   | -            | -     | -      | -              |
| 3014     | 47.24         | 82.63 | 59.09 | <b>62.99</b>   | 11.51        | 6.29  | 11.37 | <b>9.72</b>    | -            | -     | -      | -              |
| 3015     | 46.66         | 56.94 | 52.11 | <b>51.90</b>   | 25.26        | 74.41 | 52.00 | <b>50.56</b>   | -            | -     | -      | -              |



2759-001

A Single Dose Toxicity Study of Test Article Administered by Intrathecal Injection in Rats

Individual Rotating Rod Values - Male

Fall Time (sec)

| High Dose | Day -1 (PRDO) |       |        |              | Day 28       |       |       |              | Day 90       |       |       |              |
|-----------|---------------|-------|--------|--------------|--------------|-------|-------|--------------|--------------|-------|-------|--------------|
|           | Trial Number  |       |        |              | Trial Number |       |       |              | Trial Number |       |       |              |
|           | 1             | 2     | 3      | Average      | 1            | 2     | 3     | Average      | 1            | 2     | 3     | Average      |
| 4001      | 10.72         | 26.19 | 26.82  | <b>21.24</b> | -            | -     | -     | -            | 52.18        | 70.36 | 35.96 | <b>52.83</b> |
| 4002      | 48.25         | 20.75 | 74.76  | <b>47.92</b> | -            | -     | -     | -            | 28.41        | 56.01 | 53.27 | <b>45.90</b> |
| 4003      | 64.68         | 81.60 | 82.73  | <b>76.34</b> | -            | -     | -     | -            | 34.07        | 25.12 | 36.75 | <b>31.98</b> |
| 4004      | 74.07         | 13.31 | 16.79  | <b>34.72</b> | -            | -     | -     | -            | 36.91        | 35.83 | 36.19 | <b>36.31</b> |
| 4005      | 59.97         | 80.31 | 44.55  | <b>61.61</b> | -            | -     | -     | -            | 38.55        | 47.33 | 51.75 | <b>45.88</b> |
| 4011      | 33.06         | 40.36 | 48.86  | <b>40.76</b> | 53.98        | 62.70 | 79.97 | <b>65.55</b> | -            | -     | -     | -            |
| 4012      | 37.46         | 12.53 | 12.43  | <b>20.81</b> | 22.65        | 6.88  | 7.66  | <b>12.40</b> | -            | -     | -     | -            |
| 4013      | 110.50        | 22.67 | 107.50 | <b>80.22</b> | 8.00         | 81.23 | 49.94 | <b>46.39</b> | -            | -     | -     | -            |
| 4014      | 43.28         | 60.97 | 71.81  | <b>58.69</b> | 76.64        | 29.94 | 20.28 | <b>42.29</b> | -            | -     | -     | -            |
| 4015      | 66.99         | 82.29 | 100.34 | <b>83.21</b> | 103.40       | 58.42 | 60.95 | <b>74.26</b> | -            | -     | -     | -            |

2759-001  
 A Single Dose Toxicity Study of Test Article Administered by Intrathecal Injection in Rats

Individual Rotating Rod Values - Female

Fall Time (sec)

| Vehicle | Day -1 (PRDO) |        |        |               | Day 28       |        |        |              | Day 90       |        |       |              |
|---------|---------------|--------|--------|---------------|--------------|--------|--------|--------------|--------------|--------|-------|--------------|
|         | Trial Number  |        |        |               | Trial Number |        |        |              | Trial Number |        |       |              |
|         | 1             | 2      | 3      | Average       | 1            | 2      | 3      | Average      | 1            | 2      | 3     | Average      |
| 1501    | 105.10        | 125.36 | 117.59 | <b>116.02</b> | -            | -      | -      | -            | 81.42        | 81.25  | 84.21 | <b>82.29</b> |
| 1502    | 93.24         | 38.10  | 53.85  | <b>61.73</b>  | -            | -      | -      | -            | 70.40        | 31.90  | 35.87 | <b>46.06</b> |
| 1503    | 20.30         | 97.30  | 24.84  | <b>47.48</b>  | -            | -      | -      | -            | 62.92        | 61.26  | 32.35 | <b>52.18</b> |
| 1504    | 67.66         | 46.69  | 62.90  | <b>59.08</b>  | -            | -      | -      | -            | 72.92        | 102.91 | 77.84 | <b>84.56</b> |
| 1505    | 12.61         | 66.38  | 72.96  | <b>50.65</b>  | -            | -      | -      | -            | 64.41        | 28.53  | 42.48 | <b>45.14</b> |
| 1511    | 89.93         | 71.20  | 62.12  | <b>74.42</b>  | 22.84        | 115.39 | 11.39  | <b>49.87</b> | -            | -      | -     | -            |
| 1512    | 39.03         | 77.75  | 19.59  | <b>45.46</b>  | 104.63       | 74.66  | 71.15  | <b>83.48</b> | -            | -      | -     | -            |
| 1513    | 62.43         | 96.08  | 106.92 | <b>88.48</b>  | 74.34        | 70.08  | 69.19  | <b>71.20</b> | -            | -      | -     | -            |
| 1514    | 113.07        | 173.13 | 154.24 | <b>146.81</b> | 36.54        | 50.11  | 124.33 | <b>70.33</b> | -            | -      | -     | -            |
| 1515    | 112.84        | 145.99 | 130.32 | <b>129.72</b> | 48.44        | 74.18  | 27.61  | <b>50.08</b> | -            | -      | -     | -            |

2759-001  
 A Single Dose Toxicity Study of Test Article Administered by Intrathecal Injection in Rats

Individual Rotating Rod Values - Female

Fall Time (sec)

| Low Dose | Day -1 (PRDO) |        |        |              | Day 28       |        |        |               | Day 90       |        |        |               |
|----------|---------------|--------|--------|--------------|--------------|--------|--------|---------------|--------------|--------|--------|---------------|
|          | Trial Number  |        |        |              | Trial Number |        |        |               | Trial Number |        |        |               |
|          | 1             | 2      | 3      | Average      | 1            | 2      | 3      | Average       | 1            | 2      | 3      | Average       |
| 2501     | 67.05         | 95.21  | 34.82  | <b>65.69</b> | -            | -      | -      | -             | 75.94        | 84.41  | 106.97 | <b>89.11</b>  |
| 2502     | 103.57        | 41.31  | 18.21  | <b>54.36</b> | -            | -      | -      | -             | 38.80        | 76.16  | 28.86  | <b>47.94</b>  |
| 2503     | 13.31         | 66.33  | 89.84  | <b>56.49</b> | -            | -      | -      | -             | 55.46        | 63.01  | 63.57  | <b>60.68</b>  |
| 2504     | 94.54         | 54.99  | 45.68  | <b>65.07</b> | -            | -      | -      | -             | 96.33        | 61.34  | 131.54 | <b>96.40</b>  |
| 2505     | 52.32         | 103.16 | 56.72  | <b>70.73</b> | -            | -      | -      | -             | 126.77       | 135.53 | 88.56  | <b>116.95</b> |
| 2511     | 73.37         | 47.13  | 74.44  | <b>64.98</b> | 73.01        | 108.28 | 109.87 | <b>97.05</b>  | -            | -      | -      | -             |
| 2512     | 57.47         | 74.62  | 70.20  | <b>67.43</b> | 71.47        | 62.60  | 65.36  | <b>66.48</b>  | -            | -      | -      | -             |
| 2513     | 72.71         | 55.35  | 28.31  | <b>52.12</b> | 88.77        | 39.92  | 105.77 | <b>78.15</b>  | -            | -      | -      | -             |
| 2514     | 110.92        | 124.83 | 55.36  | <b>97.04</b> | 73.98        | 57.55  | 69.89  | <b>67.14</b>  | -            | -      | -      | -             |
| 2515     | 50.67         | 35.74  | 143.01 | <b>76.47</b> | 132.20       | 165.61 | 168.96 | <b>155.59</b> | -            | -      | -      | -             |

2759-001  
A Single Dose Toxicity Study of Test Article Administered by Intrathecal Injection in Rats

Individual Rotating Rod Values - Female

Fall Time (sec)

| Mid Dose | Day -1 (PRDO) |        |        |                | Day 28       |       |        |                | Day 90       |       |       |                |
|----------|---------------|--------|--------|----------------|--------------|-------|--------|----------------|--------------|-------|-------|----------------|
|          | Trial Number  |        |        |                | Trial Number |       |        |                | Trial Number |       |       |                |
|          | 1             | 2      | 3      | <b>Average</b> | 1            | 2     | 3      | <b>Average</b> | 1            | 2     | 3     | <b>Average</b> |
| 3501     | 115.21        | 48.27  | 27.08  | <b>63.52</b>   | -            | -     | -      | -              | 42.39        | 70.14 | 66.47 | <b>59.67</b>   |
| 3502     | 32.12         | 25.91  | 118.14 | <b>58.72</b>   | -            | -     | -      | -              | 38.27        | 47.88 | 26.49 | <b>37.55</b>   |
| 3503     | 88.58         | 89.86  | 103.35 | <b>93.93</b>   | -            | -     | -      | -              | 108.47       | 84.93 | 43.09 | <b>78.83</b>   |
| 3504     | 48.91         | 30.53  | 9.33   | <b>29.59</b>   | -            | -     | -      | -              | 12.04        | 9.00  | 7.66  | <b>9.57</b>    |
| 3505     | 63.81         | 88.91  | 107.94 | <b>86.89</b>   | -            | -     | -      | -              | 40.54        | 47.89 | 51.84 | <b>46.76</b>   |
| 3511     | 16.01         | 49.14  | 50.86  | <b>38.67</b>   | 53.57        | 47.02 | 52.31  | <b>50.97</b>   | -            | -     | -     | -              |
| 3512     | 14.32         | 97.08  | 76.24  | <b>62.55</b>   | 98.81        | 81.40 | 109.58 | <b>96.60</b>   | -            | -     | -     | -              |
| 3513     | 85.66         | 100.22 | 119.01 | <b>101.63</b>  | 46.30        | 49.47 | 63.71  | <b>53.16</b>   | -            | -     | -     | -              |
| 3514     | 103.44        | 51.75  | 113.54 | <b>89.58</b>   | 61.29        | 82.15 | 125.41 | <b>89.62</b>   | -            | -     | -     | -              |
| 3515     | 82.85         | 51.62  | 48.05  | <b>60.84</b>   | 52.51        | 70.01 | 64.24  | <b>62.25</b>   | -            | -     | -     | -              |

2759-001

A Single Dose Toxicity Study of Test Article Administered by Intrathecal Injection in Rats

Individual Rotating Rod Values - Female

Fall Time (sec)

| High Dose | Day -1 (PRDO) |        |        |                | Day 28       |       |        |                | Day 90       |        |        |                |
|-----------|---------------|--------|--------|----------------|--------------|-------|--------|----------------|--------------|--------|--------|----------------|
|           | Trial Number  |        |        |                | Trial Number |       |        |                | Trial Number |        |        |                |
|           | 1             | 2      | 3      | <b>Average</b> | 1            | 2     | 3      | <b>Average</b> | 1            | 2      | 3      | <b>Average</b> |
| 4501      | 59.59         | 62.53  | 28.77  | <b>50.30</b>   | -            | -     | -      | -              | 21.44        | 28.67  | 17.25  | <b>22.45</b>   |
| 4502      | 87.17         | 115.72 | 66.52  | <b>89.80</b>   | -            | -     | -      | -              | 74.59        | 90.62  | 63.07  | <b>76.09</b>   |
| 4503      | 70.98         | 66.68  | 70.43  | <b>69.36</b>   | -            | -     | -      | -              | 115.08       | 125.19 | 154.13 | <b>131.47</b>  |
| 4504      | 38.81         | 101.42 | 39.80  | <b>60.01</b>   | -            | -     | -      | -              | 61.68        | 36.94  | 77.22  | <b>58.61</b>   |
| 4505      | 44.90         | 91.07  | 24.71  | <b>53.56</b>   | -            | -     | -      | -              | 68.17        | 114.68 | 103.21 | <b>95.35</b>   |
| 4511      | 15.34         | 89.08  | 43.95  | <b>49.46</b>   | 81.84        | 81.11 | 74.01  | <b>78.99</b>   | -            | -      | -      | -              |
| 4512      | 34.26         | 92.42  | 78.45  | <b>68.38</b>   | 63.52        | 88.45 | 137.98 | <b>96.65</b>   | -            | -      | -      | -              |
| 4513      | 92.51         | 127.80 | 50.17  | <b>90.16</b>   | 107.30       | 94.44 | 66.82  | <b>89.52</b>   | -            | -      | -      | -              |
| 4514      | 73.13         | 95.80  | 126.24 | <b>98.39</b>   | 94.82        | 84.77 | 113.27 | <b>97.62</b>   | -            | -      | -      | -              |
| 4515      | 65.65         | 157.55 | 65.58  | <b>96.26</b>   | 96.94        | 25.43 | 32.67  | <b>51.68</b>   | -            | -      | -      | -              |

Appendix 9  
Clinical Pathology Report

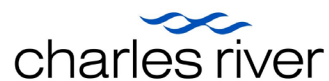

**FINAL REPORT**

**Study Phase: Clinical Pathology**

**Testing Facility Study No. 2759-001**

**Sponsor Reference No. CLN7-001**

**TESTING FACILITY:**  
Charles River Laboratories, Inc.

**TABLE OF CONTENTS**

|                                                      | Page |
|------------------------------------------------------|------|
| TABLE OF CONTENTS                                    | 2    |
| REPORT TEXT                                          | 3    |
| REPORT APPROVAL                                      | 3    |
| 1. SUMMARY                                           | 4    |
| 2. MATERIALS AND METHODS                             | 4    |
| 2.1. Group Assignments                               | 4    |
| 2.2. Hematology, Coagulation, and Clinical Chemistry | 4    |
| 2.3. Data Collection and Analysis Software           | 5    |
| 3. RESULTS AND DISCUSSION                            | 6    |
| 3.1. Hematology                                      | 6    |
| 3.2. Coagulation                                     | 6    |
| 3.3. Clinical Chemistry                              | 7    |
| TABLE                                                | 8    |
| 1. Summary of Hematology Values                      | 8    |
| 2. Summary of Coagulation Values                     | 24   |
| 3. Summary of Clinical Chemistry Values              | 30   |
| APPENDIX                                             | 48   |
| 1. Individual Hematology Values                      | 48   |
| 2. Individual Coagulation Values                     | 90   |
| 3. Individual Clinical Chemistry Values              | 100  |



### REPORT APPROVAL

DocuSigned by:  
*Caitlyn Carter*

 Signer Name: Caitlyn Carter  
Signing Reason: I approve this document  
Signing Time: 18-Mar-2020 | 16:29:33 EDT  
48CE3A2EA7874707B68B816148DE0E56

Caitlyn Carter, DVM, DACVP  
Clinical Pathologist

## 1. SUMMARY

This study was conducted for Foundation for Batten Hope to further characterize the toxicity, biodistribution, and gene expression of the test article, scAAV9/JeT-hCLN7opt-SV40pA. The test article is being developed for treatment of the neurodegenerative Batten Disease (CLN7 subtype).

Single intrathecal injections of scAAV9/JeT-hCLN7opt-SV40pA to Sprague Dawley rats at Low Dose ( $5 \times 10^{11}$  vg/animal), Mid Dose ( $2 \times 10^{12}$  vg/animal) or High Dose ( $6 \times 10^{12}$  vg/animal) levels on Day 1 with an observation period through Day 91 resulted in test article-related increases in lymphocyte counts in both sexes at the Mid and High dose levels with concomitant increases in total leukocyte counts, which tended to partially resolve by the end of the observation period except in females at the High Dose levels. Additionally, males administered the High Dose level had a test article-related increase in fibrinogen concentration that had resolved by the end of the observation period. Males administered Mid and High Dose levels and females administered Low, Mid, and High Dose levels also had test article-related increases in globulin concentrations, which had partially to fully resolved by the end of the observation period at the Low and Mid Dose levels but persisted in both sexes at the High Dose level. These changes were collectively suggestive of a minor immune or inflammatory stimulus, which lacked definitive microscopic correlates.

Males administered the Low, Mid, and High Dose levels also had test article-related decreases in triglyceride concentrations that had resolved by the end of the observation period and lacked microscopic correlates.

## 2. MATERIALS AND METHODS

### 2.1. Group Assignments

Animals were assigned to the study as indicated in Text Table 1.

Text Table 1  
Group Assignments

| Group No. | Dose Level (vg/animal) | No. of Animals |   |                 |   |                 |   |
|-----------|------------------------|----------------|---|-----------------|---|-----------------|---|
|           |                        | Necropsy Day 8 |   | Necropsy Day 29 |   | Necropsy Day 91 |   |
|           |                        | M              | F | M               | F | M               | F |
| 1         | 0                      | 5              | 5 | 5               | 5 | 5               | 5 |
| 2         | $5 \times 10^{11}$     | 5              | 5 | 5               | 5 | 5               | 5 |
| 3         | $2 \times 10^{12}$     | 5              | 5 | 5               | 5 | 5               | 5 |
| 4         | $6 \times 10^{12}$     | 5              | 5 | 5               | 5 | 5               | 5 |

M - Male

F - Female

### 2.2. Hematology, Coagulation, and Clinical Chemistry

Clinical pathology evaluations were conducted on all animals at the interval specified in [Text Table 2](#). The animals had access to drinking water but were fasted overnight prior to scheduled sample collection. Blood samples (approximately 2.5 mL to 3.5 mL) were collected via the vena cava after carbon dioxide inhalation. The samples were collected into tubes containing K<sub>2</sub>EDTA for evaluation of hematology parameters and sodium citrate for evaluation of coagulation parameters. Blood samples were collected into serum separator tubes without anticoagulant, allowed to clot at controlled room temperature, and processed to serum for evaluation of clinical chemistry parameters. On occasion, blood samples were clotted.

Text Table 2  
Clinical Pathology Sample Collection

| <b>Panel</b>       | <b>Collection Interval</b> | <b>Group 1</b> | <b>Group 2</b> | <b>Group 3</b> | <b>Group 4</b> |
|--------------------|----------------------------|----------------|----------------|----------------|----------------|
| Hematology         | Terminal                   | X              | X              | X              | X              |
| Coagulation        | Terminal                   | X              | X              | X              | X              |
| Clinical Chemistry | Terminal                   | X              | X              | X              | X              |

X - samples were collected

**2.3. Data Collection and Analysis Software**

Data Collection and Analysis Software is listed in Text Table 3.

Text Table 3  
Data Collection and Analysis Software

|                    |                                                  |
|--------------------|--------------------------------------------------|
| Hematology         | Advia 2120i v6.9                                 |
| Coagulation        | STA Compact Max v103.04 or STA-R Evolution v3.04 |
| Clinical Chemistry | AU5800 v05.03                                    |

### 3. RESULTS AND DISCUSSION

For the purpose of this report, treated animals' values were compared to control animals' values. Fold change (x) in clinical pathology parameters was determined by comparing the scAAV9/JeT-hCLN7opt-SV40pA group mean to the respective control group mean unless otherwise noted.

#### 3.1. Hematology

(Table 1 and Appendix 1)

On Days 8, 29, and 91 in both sexes at the Mid Dose and High Dose there were minimal to mild increases in mean lymphocyte counts with concomitant increases in mean total leukocyte counts, as illustrated in Text Table 4. These changes tended to be most pronounced on Day 29, except in High Dose females that had the most pronounced change on Day 91. These changes were considered test article-related. Along with increases in fibrinogen concentrations (see Section 3.2) and globulin concentrations (see Section 3.3), these changes were collectively suggestive of a minor immune or inflammatory stimulus, which lacked definitive microscopic correlates.

Text Table 4  
scAAV9/JeT-hCLN7opt-SV40pA-Related Hematology Changes

| Group<br>Dose Level<br>Sex                                                                                                                                                                                             | 2        |   | 3        |       | 4         |       |
|------------------------------------------------------------------------------------------------------------------------------------------------------------------------------------------------------------------------|----------|---|----------|-------|-----------|-------|
|                                                                                                                                                                                                                        | Low Dose |   | Mid Dose |       | High Dose |       |
|                                                                                                                                                                                                                        | M        | F | M        | F     | M         | F     |
| <b>Lymphocytes</b>                                                                                                                                                                                                     |          |   |          |       |           |       |
| Day 8                                                                                                                                                                                                                  | —        | — | 1.24x    | 1.18x | 1.18x     | 1.16x |
| Day 29                                                                                                                                                                                                                 | —        | — | 1.54x    | 1.33x | 1.71x     | 1.20x |
| Day 91                                                                                                                                                                                                                 | —        | — | 1.20x    | 1.30x | 1.25x     | 1.67x |
| <b>Total Leukocytes</b>                                                                                                                                                                                                |          |   |          |       |           |       |
| Day 8                                                                                                                                                                                                                  | —        | — | 1.21x    | 1.18x | 1.13x     | 1.15x |
| Day 29                                                                                                                                                                                                                 | —        | — | 1.48x    | 1.26x | 1.60x     | 1.15x |
| Day 91                                                                                                                                                                                                                 | —        | — | 1.10x    | 1.25x | 1.17x     | 1.60x |
| M = Males F = Females<br>A dash (—) indicates absence of a test article-related change. Numerical values indicate fold (x) change of the treated group mean value relative to the concurrent control group mean value. |          |   |          |       |           |       |

All other fluctuations among individual and mean hematology values, regardless of statistical significance, were not considered test article-related due to one or more of the following: negligible magnitude, inconsistent direction of change, lack of a dose-responsive pattern, and/or relation to expected values for biologic and procedure-related variation.

#### 3.2. Coagulation

(Table 2 and Appendix 2)

On Day 29 in males at the High Dose there was a minimal increase in mean fibrinogen concentration (1.25x), which had resolved by Day 91. This increase in fibrinogen concentration was considered test article-related and suggestive of a minor immune or inflammatory stimulus as previously discussed.

All other fluctuations among individual and mean coagulation values, regardless of statistical significance, were not considered test article-related due to one or more of the following: negligible magnitude, inconsistent direction of change, lack of a dose-responsive pattern, and/or relation to expected values for biologic and procedure-related variation.

### 3.3. Clinical Chemistry

(Table 3 and Appendix 3)

As illustrated in Text Table 5, on Day 29 in males at the Mid and High Dose levels and females at all dose levels there were minimal increases in mean globulin concentrations. These changes had partially to fully resolved by Day 91 at the Low and Mid Dose levels, but persisted at the High Dose. These changes were considered test article-related and suggestive of a minor immune or inflammatory stimulus, as previously discussed.

On Day 8 males at all dose levels had mild decreases in mean triglyceride concentrations, which had partially resolved by Day 29 and fully resolved by Day 91. These decreases in triglyceride concentrations were considered test article-related. No microscopic correlates were observed.

Text Table 5  
scAAV9/JeT-hCLN7opt-SV40pA-Related Clinical Chemistry Changes

| Group<br>Dose Level<br>Sex                                                                                                                                                                                             | 2<br>Low Dose |       | 3<br>Mid Dose |       | 4<br>High Dose |       |
|------------------------------------------------------------------------------------------------------------------------------------------------------------------------------------------------------------------------|---------------|-------|---------------|-------|----------------|-------|
|                                                                                                                                                                                                                        | M             | F     | M             | F     | M              | F     |
| <b>Globulin</b>                                                                                                                                                                                                        |               |       |               |       |                |       |
| Day 8                                                                                                                                                                                                                  | —             | —     | —             | —     | —              | —     |
| Day 29                                                                                                                                                                                                                 | —             | 1.10x | 1.12x         | 1.10x | 1.08x          | 1.09x |
| Day 91                                                                                                                                                                                                                 | —             | 1.05x | 1.07x         | —     | 1.09x          | 1.08x |
| <b>Triglycerides</b>                                                                                                                                                                                                   |               |       |               |       |                |       |
| Day 8                                                                                                                                                                                                                  | 0.53x         | —     | 0.57x         | —     | 0.50x          | —     |
| Day 29                                                                                                                                                                                                                 | 0.77x         | —     | 0.82x         | —     | 0.82x          | —     |
| Day 91                                                                                                                                                                                                                 | —             | —     | —             | —     | —              | —     |
| M = Males F = Females<br>A dash (—) indicates absence of a test article-related change. Numerical values indicate fold (x) change of the treated group mean value relative to the concurrent control group mean value. |               |       |               |       |                |       |

All other fluctuations among individual and mean clinical chemistry values, regardless of statistical significance, were not considered test article-related due to one or more of the following: negligible magnitude, inconsistent direction of change, lack of a dose-responsive pattern, and/or relation to expected values for biologic and procedure-related variation.

Table 1  
Summary of Hematology Values

Abbreviations for Hematology Parameters

- MCV - Mean Corpuscular Volume
- MCH - Mean Corpuscular Hemoglobin
- MCHC - Mean Corpuscular Hemoglobin Concentration
- RDW - Red Blood Cell Distribution Width

2759-001  
A Single Dose Toxicity Study of Test Article Administered by Intrathecal Injection in Rats

## Summary of Hematology Values

| Sex: Male                                      |        |      | Vehicle | Low Dose | Mid Dose | High Dose |
|------------------------------------------------|--------|------|---------|----------|----------|-----------|
| Day(s) Relative to Start Date                  |        |      |         |          |          |           |
| Leukocytes<br>(10 <sup>3</sup> cells/<br>μL)   | 8 [g]  | Mean | 13.33   | 14.76    | 16.21    | 15.07     |
|                                                |        | SD   | 0.726   | 2.936    | 1.535    | 2.586     |
|                                                |        | N    | 5       | 5        | 5        | 5         |
|                                                | 29 [g] | Mean | 11.64   | 11.25    | 17.22 a  | 18.59 b   |
|                                                |        | SD   | 1.161   | 1.999    | 3.296    | 3.895     |
|                                                |        | N    | 5       | 5        | 5        | 5         |
|                                                | 91 [g] | Mean | 11.74   | 12.20    | 12.94    | 13.78     |
|                                                |        | SD   | 2.112   | 1.685    | 0.947    | 1.660     |
|                                                |        | N    | 5       | 5        | 5        | 5         |
| Erythrocytes<br>(10 <sup>6</sup> cells/<br>μL) | 8 [g]  | Mean | 7.860   | 7.794    | 7.900    | 8.400     |
|                                                |        | SD   | 0.4043  | 0.6143   | 0.3870   | 0.1500    |
|                                                |        | N    | 5       | 5        | 5        | 5         |
|                                                | 29 [g] | Mean | 9.246   | 9.114    | 8.866    | 8.448     |
|                                                |        | SD   | 0.3568  | 0.3258   | 0.6760   | 0.4688    |
|                                                |        | N    | 5       | 5        | 5        | 5         |
|                                                | 91 [g] | Mean | 9.270   | 9.960    | 9.684    | 9.494     |
|                                                |        | SD   | 0.3205  | 0.7675   | 0.3128   | 0.1412    |
|                                                |        | N    | 5       | 5        | 5        | 5         |
| Hemoglobin<br>(g/dL)                           | 8 [g]  | Mean | 15.90   | 15.86    | 15.78    | 17.04 a   |
|                                                |        | SD   | 0.711   | 0.961    | 0.536    | 0.288     |
|                                                |        | N    | 5       | 5        | 5        | 5         |

[g] - Anova &amp; Dunnett: a = p &lt; 0.05; b = p &lt; 0.01



2759-001  
A Single Dose Toxicity Study of Test Article Administered by Intrathecal Injection in Rats

Summary of Hematology Values

| Sex: Male                     |        |      | Vehicle | Low Dose | Mid Dose | High Dose |
|-------------------------------|--------|------|---------|----------|----------|-----------|
| Day(s) Relative to Start Date |        |      |         |          |          |           |
| Hemoglobin (g/dL)             | 29 [g] | Mean | 17.90   | 17.46    | 16.86    | 16.62 a   |
|                               |        | SD   | 1.000   | 0.483    | 0.404    | 0.626     |
|                               |        | N    | 5       | 5        | 5        | 5         |
|                               | 91 [g] | Mean | 16.44   | 17.24    | 17.20    | 17.18     |
|                               |        | SD   | 0.555   | 1.163    | 0.640    | 0.642     |
|                               |        | N    | 5       | 5        | 5        | 5         |
| Hematocrit (%)                | 8 [g]  | Mean | 54.64   | 53.36    | 52.18    | 55.28     |
|                               |        | SD   | 2.797   | 3.310    | 1.659    | 0.915     |
|                               |        | N    | 5       | 5        | 5        | 5         |
|                               | 29 [g] | Mean | 56.78   | 55.92    | 53.14    | 51.92 a   |
|                               |        | SD   | 3.600   | 2.128    | 1.787    | 2.524     |
|                               |        | N    | 5       | 5        | 5        | 5         |
|                               | 91 [g] | Mean | 53.68   | 54.90    | 55.66    | 54.62     |
|                               |        | SD   | 2.564   | 4.445    | 2.311    | 2.146     |
|                               |        | N    | 5       | 5        | 5        | 5         |
| MCV (fL)                      | 8 [g]  | Mean | 69.58   | 68.64    | 66.10    | 65.86     |
|                               |        | SD   | 2.303   | 3.272    | 1.836    | 1.401     |
|                               |        | N    | 5       | 5        | 5        | 5         |
|                               | 29 [g] | Mean | 61.38   | 61.38    | 60.14    | 61.48     |
|                               |        | SD   | 2.776   | 1.018    | 3.402    | 1.404     |
|                               |        | N    | 5       | 5        | 5        | 5         |

[g] - Anova & Dunnett: a = p < 0.05

2759-001  
A Single Dose Toxicity Study of Test Article Administered by Intrathecal Injection in Rats

Summary of Hematology Values

| Sex: Male                     |        |      | Vehicle | Low Dose | Mid Dose | High Dose |
|-------------------------------|--------|------|---------|----------|----------|-----------|
| Day(s) Relative to Start Date |        |      |         |          |          |           |
| MCV (fL)                      | 91 [g] | Mean | 57.92   | 55.12    | 57.50    | 57.52     |
|                               |        | SD   | 1.983   | 0.638    | 1.961    | 1.659     |
|                               |        | N    | 5       | 5        | 5        | 5         |
| MCH (pg)                      | 8 [g]  | Mean | 20.20   | 20.40    | 20.02    | 20.30     |
|                               |        | SD   | 0.292   | 0.791    | 0.432    | 0.505     |
|                               |        | N    | 5       | 5        | 5        | 5         |
|                               | 29 [g] | Mean | 19.36   | 19.12    | 19.06    | 19.68     |
|                               |        | SD   | 0.826   | 0.563    | 1.115    | 0.563     |
|                               |        | N    | 5       | 5        | 5        | 5         |
|                               | 91 [g] | Mean | 17.72   | 17.32    | 17.76    | 18.10     |
|                               |        | SD   | 0.319   | 0.363    | 0.513    | 0.515     |
|                               |        | N    | 5       | 5        | 5        | 5         |
| MCHC (g/dL)                   | 8 [g]  | Mean | 29.08   | 29.74    | 30.28 b  | 30.84 b   |
|                               |        | SD   | 0.701   | 0.757    | 0.259    | 0.313     |
|                               |        | N    | 5       | 5        | 5        | 5         |
|                               | 29 [g] | Mean | 31.56   | 31.18    | 31.70    | 32.02     |
|                               |        | SD   | 0.650   | 0.760    | 0.400    | 0.665     |
|                               |        | N    | 5       | 5        | 5        | 5         |
|                               | 91 [g] | Mean | 30.66   | 31.42    | 30.86    | 31.48 a   |
|                               |        | SD   | 0.594   | 0.638    | 0.305    | 0.179     |
|                               |        | N    | 5       | 5        | 5        | 5         |

[g] - Anova & Dunnett: a = p < 0.05; b = p < 0.01

2759-001  
A Single Dose Toxicity Study of Test Article Administered by Intrathecal Injection in Rats

Summary of Hematology Values

| Sex: Male                                               |         |      | Vehicle | Low Dose | Mid Dose | High Dose |
|---------------------------------------------------------|---------|------|---------|----------|----------|-----------|
| Day(s) Relative to Start Date                           |         |      |         |          |          |           |
| Platelets<br>(10 <sup>3</sup> cells/<br>µL)             | 8 [g]   | Mean | 1272.2  | 1372.4   | 1333.6   | 1260.4    |
|                                                         |         | SD   | 137.34  | 129.99   | 77.73    | 137.56    |
|                                                         |         | N    | 5       | 5        | 5        | 5         |
|                                                         | 29 [g]  | Mean | 966.6   | 1114.0   | 1143.4   | 1029.8    |
|                                                         |         | SD   | 254.64  | 111.60   | 117.41   | 88.88     |
|                                                         |         | N    | 5       | 5        | 5        | 5         |
|                                                         | 91 [g1] | Mean | 960.4   | 1122.2   | 1196.2   | 1072.6    |
|                                                         |         | SD   | 151.32  | 186.32   | 25.92    | 83.88     |
|                                                         |         | N    | 5       | 5        | 5        | 5         |
| Absolute Reticulocyte<br>(10 <sup>3</sup> cells/<br>µL) | 8 [g]   | Mean | 430.18  | 441.62   | 442.88   | 432.52    |
|                                                         |         | SD   | 29.615  | 29.113   | 72.551   | 66.198    |
|                                                         |         | N    | 5       | 5        | 5        | 5         |
|                                                         | 29 [g]  | Mean | 241.28  | 229.14   | 229.86   | 227.40    |
|                                                         |         | SD   | 40.906  | 49.361   | 57.482   | 21.198    |
|                                                         |         | N    | 5       | 5        | 5        | 5         |
|                                                         | 91 [g]  | Mean | 173.76  | 186.62   | 193.58   | 224.66 b  |
|                                                         |         | SD   | 16.971  | 20.152   | 25.652   | 23.925    |
|                                                         |         | N    | 5       | 5        | 5        | 5         |
| Neutrophils<br>(10 <sup>3</sup> cells/<br>µL)           | 8 [g]   | Mean | 1.682   | 1.540    | 1.794    | 1.324     |
|                                                         |         | SD   | 0.3209  | 0.3286   | 0.1405   | 0.3589    |
|                                                         |         | N    | 5       | 5        | 5        | 5         |

[g] - Anova & Dunnett: b = p < 0.01  
[g1] - Kruskal-Wallis & Dunn

2759-001  
A Single Dose Toxicity Study of Test Article Administered by Intrathecal Injection in Rats

Summary of Hematology Values

| Sex: Male                                     |         |      | Vehicle | Low Dose | Mid Dose | High Dose |
|-----------------------------------------------|---------|------|---------|----------|----------|-----------|
| Day(s) Relative to Start Date                 |         |      |         |          |          |           |
| Neutrophils<br>(10 <sup>3</sup> cells/<br>µL) | 29 [g]  | Mean | 1.564   | 1.234    | 1.686    | 1.402     |
|                                               |         | SD   | 0.3174  | 0.2955   | 0.9141   | 0.5822    |
|                                               |         | N    | 5       | 5        | 5        | 5         |
|                                               | 91 [g1] | Mean | 2.304   | 1.314    | 1.622    | 1.926     |
|                                               |         | SD   | 1.4466  | 0.2900   | 0.6211   | 0.7255    |
|                                               |         | N    | 5       | 5        | 5        | 5         |
| Lymphocytes<br>(10 <sup>3</sup> cells/<br>µL) | 8 [g]   | Mean | 11.062  | 12.534   | 13.758   | 13.070    |
|                                               |         | SD   | 0.6637  | 2.6235   | 1.4903   | 2.1338    |
|                                               |         | N    | 5       | 5        | 5        | 5         |
|                                               | 29 [g]  | Mean | 9.598   | 9.482    | 14.766 b | 16.376 b  |
|                                               |         | SD   | 0.8871  | 1.8609   | 2.4378   | 3.5459    |
|                                               |         | N    | 5       | 5        | 5        | 5         |
|                                               | 91 [g]  | Mean | 8.810   | 10.310   | 10.592   | 11.054    |
|                                               |         | SD   | 1.5301  | 1.3765   | 0.5542   | 1.1584    |
|                                               |         | N    | 5       | 5        | 5        | 5         |
| Monocytes<br>(10 <sup>3</sup> cells/<br>µL)   | 8 [g]   | Mean | 0.360   | 0.424    | 0.392    | 0.400     |
|                                               |         | SD   | 0.0794  | 0.2156   | 0.1130   | 0.1329    |
|                                               |         | N    | 5       | 5        | 5        | 5         |
|                                               | 29 [g]  | Mean | 0.194   | 0.300    | 0.338    | 0.350     |
|                                               |         | SD   | 0.0859  | 0.0866   | 0.1114   | 0.0875    |
|                                               |         | N    | 5       | 5        | 5        | 5         |

[g] - Anova & Dunnett: b = p < 0.01

[g1] - Anova & Dunnett(Log)

2759-001  
A Single Dose Toxicity Study of Test Article Administered by Intrathecal Injection in Rats

Summary of Hematology Values

| Sex: Male                                     |        |      | Vehicle | Low Dose | Mid Dose | High Dose |
|-----------------------------------------------|--------|------|---------|----------|----------|-----------|
| Day(s) Relative to Start Date                 |        |      |         |          |          |           |
| Monocytes<br>(10 <sup>3</sup> cells/<br>µL)   | 91 [g] | Mean | 0.326   | 0.258    | 0.402    | 0.394     |
|                                               |        | SD   | 0.0702  | 0.0792   | 0.1973   | 0.1633    |
|                                               |        | N    | 5       | 5        | 5        | 5         |
| Eosinophils<br>(10 <sup>3</sup> cells/<br>µL) | 8 [g]  | Mean | 0.060   | 0.064    | 0.068    | 0.066     |
|                                               |        | SD   | 0.0187  | 0.0195   | 0.0268   | 0.0270    |
|                                               |        | N    | 5       | 5        | 5        | 5         |
|                                               | 29 [g] | Mean | 0.132   | 0.044 a  | 0.106    | 0.076     |
|                                               |        | SD   | 0.0536  | 0.0207   | 0.0607   | 0.0321    |
|                                               |        | N    | 5       | 5        | 5        | 5         |
|                                               | 91 [g] | Mean | 0.094   | 0.144    | 0.122    | 0.122     |
|                                               |        | SD   | 0.0167  | 0.0577   | 0.0363   | 0.0449    |
|                                               |        | N    | 5       | 5        | 5        | 5         |
| Basophils<br>(10 <sup>3</sup> cells/<br>µL)   | 8 [g]  | Mean | 0.066   | 0.068    | 0.072    | 0.074     |
|                                               |        | SD   | 0.0195  | 0.0295   | 0.0179   | 0.0241    |
|                                               |        | N    | 5       | 5        | 5        | 5         |
|                                               | 29 [g] | Mean | 0.060   | 0.040    | 0.078    | 0.090     |
|                                               |        | SD   | 0.0100  | 0.0122   | 0.0303   | 0.0274    |
|                                               |        | N    | 5       | 5        | 5        | 5         |
|                                               | 91 [g] | Mean | 0.060   | 0.046    | 0.052    | 0.066     |
|                                               |        | SD   | 0.0212  | 0.0152   | 0.0217   | 0.0089    |
|                                               |        | N    | 5       | 5        | 5        | 5         |

[g] - Anova & Dunnett: a = p < 0.05

2759-001  
A Single Dose Toxicity Study of Test Article Administered by Intrathecal Injection in Rats

Summary of Hematology Values

| Sex: Male                                     |        |      | Vehicle | Low Dose | Mid Dose | High Dose |
|-----------------------------------------------|--------|------|---------|----------|----------|-----------|
| Day(s) Relative to Start Date                 |        |      |         |          |          |           |
| Other Cells<br>(10 <sup>3</sup> cells/<br>µL) | 8 [g]  | Mean | 0.094   | 0.134    | 0.132    | 0.130     |
|                                               |        | SD   | 0.0288  | 0.0513   | 0.0356   | 0.0469    |
|                                               |        | N    | 5       | 5        | 5        | 5         |
|                                               | 29 [g] | Mean | 0.096   | 0.146    | 0.246 a  | 0.302 b   |
|                                               |        | SD   | 0.0297  | 0.0647   | 0.0820   | 0.1008    |
|                                               |        | N    | 5       | 5        | 5        | 5         |
|                                               | 91 [g] | Mean | 0.146   | 0.124    | 0.156    | 0.210     |
|                                               |        | SD   | 0.0695  | 0.0639   | 0.0607   | 0.0636    |
|                                               |        | N    | 5       | 5        | 5        | 5         |
| RDW<br>(%)                                    | 8 [g]  | Mean | 13.26   | 13.28    | 13.48    | 12.66     |
|                                               |        | SD   | 0.462   | 0.295    | 0.676    | 0.541     |
|                                               |        | N    | 5       | 5        | 5        | 5         |
|                                               | 29 [g] | Mean | 12.26   | 11.88    | 12.24    | 11.96     |
|                                               |        | SD   | 0.451   | 0.502    | 0.422    | 0.219     |
|                                               |        | N    | 5       | 5        | 5        | 5         |
|                                               | 91 [g] | Mean | 12.70   | 12.74    | 13.64    | 12.80     |
|                                               |        | SD   | 0.354   | 0.472    | 0.820    | 0.745     |
|                                               |        | N    | 5       | 5        | 5        | 5         |

[g] - Anova & Dunnett: a = p < 0.05; b = p < 0.01

2759-001  
A Single Dose Toxicity Study of Test Article Administered by Intrathecal Injection in Rats

Summary of Hematology Values

| Sex: Female                                    |         |      | Vehicle | Low Dose | Mid Dose | High Dose |
|------------------------------------------------|---------|------|---------|----------|----------|-----------|
| Day(s) Relative to Start Date                  |         |      |         |          |          |           |
| Leukocytes<br>(10 <sup>3</sup> cells/<br>µL)   | 8 [g]   | Mean | 10.38   | 10.34    | 12.24    | 11.89     |
|                                                |         | SD   | 1.937   | 1.746    | 1.969    | 4.357     |
|                                                |         | N    | 5       | 5        | 5        | 5         |
|                                                | 29 [g]  | Mean | 10.55   | 11.77    | 13.25    | 12.17     |
|                                                |         | SD   | 4.059   | 1.764    | 3.998    | 1.960     |
|                                                |         | N    | 5       | 5        | 5        | 5         |
|                                                | 91 [g1] | Mean | 8.39    | 8.50     | 10.47    | 13.39 a   |
|                                                |         | SD   | 2.364   | 0.387    | 1.678    | 4.254     |
|                                                |         | N    | 5       | 5        | 5        | 5         |
| Erythrocytes<br>(10 <sup>6</sup> cells/<br>µL) | 8 [g]   | Mean | 8.080   | 7.836    | 8.202    | 8.488     |
|                                                |         | SD   | 0.2451  | 0.4978   | 0.4045   | 0.4711    |
|                                                |         | N    | 5       | 5        | 5        | 5         |
|                                                | 29 [g]  | Mean | 9.024   | 8.702    | 8.812    | 8.752     |
|                                                |         | SD   | 0.5333  | 0.6657   | 0.5630   | 0.0716    |
|                                                |         | N    | 5       | 5        | 5        | 5         |
|                                                | 91 [g]  | Mean | 9.100   | 8.482    | 8.694    | 8.768     |
|                                                |         | SD   | 0.6463  | 0.3477   | 0.8037   | 0.5758    |
|                                                |         | N    | 5       | 5        | 5        | 5         |
| Hemoglobin<br>(g/dL)                           | 8 [g]   | Mean | 16.18   | 15.82    | 16.08    | 16.88     |
|                                                |         | SD   | 0.390   | 0.740    | 0.512    | 1.110     |
|                                                |         | N    | 5       | 5        | 5        | 5         |

[g] - Anova & Dunnett  
[g1] - Anova & Dunnett(Log): a = p < 0.05

2759-001  
A Single Dose Toxicity Study of Test Article Administered by Intrathecal Injection in Rats

Summary of Hematology Values

| Sex: Female                   |        |      | Vehicle | Low Dose | Mid Dose | High Dose |
|-------------------------------|--------|------|---------|----------|----------|-----------|
| Day(s) Relative to Start Date |        |      |         |          |          |           |
| Hemoglobin (g/dL)             | 29 [g] | Mean | 17.44   | 16.66    | 16.52    | 16.54     |
|                               |        | SD   | 1.001   | 0.956    | 0.712    | 0.279     |
|                               |        | N    | 5       | 5        | 5        | 5         |
|                               | 91 [g] | Mean | 16.92   | 16.32    | 16.60    | 16.58     |
|                               |        | SD   | 0.531   | 0.998    | 1.693    | 1.033     |
|                               |        | N    | 5       | 5        | 5        | 5         |
| Hematocrit (%)                | 8 [g]  | Mean | 52.28   | 51.42    | 51.08    | 52.92     |
|                               |        | SD   | 2.190   | 2.770    | 0.947    | 2.930     |
|                               |        | N    | 5       | 5        | 5        | 5         |
|                               | 29 [g] | Mean | 54.22   | 51.76    | 51.04    | 50.76     |
|                               |        | SD   | 3.461   | 4.050    | 2.669    | 0.730     |
|                               |        | N    | 5       | 5        | 5        | 5         |
|                               | 91 [g] | Mean | 53.56   | 51.60    | 52.64    | 51.70     |
|                               |        | SD   | 2.499   | 1.710    | 5.525    | 4.501     |
|                               |        | N    | 5       | 5        | 5        | 5         |
| MCV (fL)                      | 8 [g]  | Mean | 64.72   | 65.70    | 62.34    | 62.38     |
|                               |        | SD   | 2.846   | 1.065    | 2.337    | 2.778     |
|                               |        | N    | 5       | 5        | 5        | 5         |
|                               | 29 [g] | Mean | 60.10   | 59.48    | 57.94    | 57.98     |
|                               |        | SD   | 2.372   | 1.874    | 1.837    | 0.602     |
|                               |        | N    | 5       | 5        | 5        | 5         |

[g] - Anova & Dunnett



2759-001  
 A Single Dose Toxicity Study of Test Article Administered by Intrathecal Injection in Rats

Summary of Hematology Values

| Sex: Female                   |        |      | Vehicle | Low Dose | Mid Dose | High Dose |
|-------------------------------|--------|------|---------|----------|----------|-----------|
| Day(s) Relative to Start Date |        |      |         |          |          |           |
| MCV (fL)                      | 91 [g] | Mean | 59.00   | 60.90    | 60.54    | 58.90     |
|                               |        | SD   | 3.109   | 1.313    | 2.786    | 1.465     |
|                               |        | N    | 5       | 5        | 5        | 5         |
| MCH (pg)                      | 8 [g]  | Mean | 20.00   | 20.20    | 19.64    | 19.90     |
|                               |        | SD   | 0.524   | 0.557    | 0.673    | 0.539     |
|                               |        | N    | 5       | 5        | 5        | 5         |
|                               | 29 [g] | Mean | 19.36   | 19.18    | 18.80    | 18.88     |
|                               |        | SD   | 0.518   | 0.716    | 0.644    | 0.327     |
|                               |        | N    | 5       | 5        | 5        | 5         |
|                               | 91 [g] | Mean | 18.66   | 19.22    | 19.10    | 18.90     |
|                               |        | SD   | 1.163   | 0.482    | 0.970    | 0.367     |
|                               |        | N    | 5       | 5        | 5        | 5         |
| MCHC (g/dL)                   | 8 [g]  | Mean | 30.94   | 30.78    | 31.52    | 31.90     |
|                               |        | SD   | 0.764   | 0.370    | 0.563    | 0.930     |
|                               |        | N    | 5       | 5        | 5        | 5         |
|                               | 29 [g] | Mean | 32.18   | 32.24    | 32.40    | 32.56     |
|                               |        | SD   | 0.657   | 0.847    | 0.354    | 0.594     |
|                               |        | N    | 5       | 5        | 5        | 5         |
|                               | 91 [g] | Mean | 31.64   | 31.58    | 31.54    | 32.12     |
|                               |        | SD   | 0.757   | 0.887    | 0.288    | 0.983     |
|                               |        | N    | 5       | 5        | 5        | 5         |

[g] - Anova & Dunnett

2759-001  
A Single Dose Toxicity Study of Test Article Administered by Intrathecal Injection in Rats

Summary of Hematology Values

| Sex: Female                                             |         |      | Vehicle | Low Dose | Mid Dose | High Dose |
|---------------------------------------------------------|---------|------|---------|----------|----------|-----------|
| Day(s) Relative to Start Date                           |         |      |         |          |          |           |
| Platelets<br>(10 <sup>3</sup> cells/<br>µL)             | 8 [g]   | Mean | 1266.6  | 1126.8   | 1290.6   | 1140.6    |
|                                                         |         | SD   | 150.35  | 150.25   | 130.56   | 102.16    |
|                                                         |         | N    | 5       | 5        | 5        | 5         |
|                                                         | 29 [g1] | Mean | 981.0   | 925.8    | 1042.2   | 1030.4    |
|                                                         |         | SD   | 75.05   | 338.43   | 98.73    | 99.94     |
|                                                         |         | N    | 5       | 5        | 5        | 5         |
|                                                         | 91 [g]  | Mean | 959.8   | 957.2    | 934.0    | 854.0     |
|                                                         |         | SD   | 205.12  | 159.20   | 191.24   | 144.46    |
|                                                         |         | N    | 5       | 5        | 5        | 5         |
| Absolute Reticulocyte<br>(10 <sup>3</sup> cells/<br>µL) | 8 [g]   | Mean | 276.58  | 271.76   | 255.60   | 228.68    |
|                                                         |         | SD   | 43.596  | 53.896   | 31.181   | 56.954    |
|                                                         |         | N    | 5       | 5        | 5        | 5         |
|                                                         | 29 [g]  | Mean | 215.02  | 217.80   | 223.88   | 204.12    |
|                                                         |         | SD   | 29.311  | 33.443   | 39.149   | 36.470    |
|                                                         |         | N    | 5       | 5        | 5        | 5         |
|                                                         | 91 [g]  | Mean | 171.08  | 192.04   | 221.50   | 177.86    |
|                                                         |         | SD   | 48.296  | 27.511   | 48.805   | 14.964    |
|                                                         |         | N    | 5       | 5        | 5        | 5         |
| Neutrophils<br>(10 <sup>3</sup> cells/<br>µL)           | 8 [g]   | Mean | 0.842   | 0.700    | 0.964    | 0.806     |
|                                                         |         | SD   | 0.2282  | 0.2137   | 0.2463   | 0.2420    |
|                                                         |         | N    | 5       | 5        | 5        | 5         |

[g] - Anova & Dunnett  
[g1] - Kruskal-Wallis & Dunn

2759-001  
A Single Dose Toxicity Study of Test Article Administered by Intrathecal Injection in Rats

Summary of Hematology Values

| Sex: Female                                   |        |      | Vehicle | Low Dose | Mid Dose | High Dose |
|-----------------------------------------------|--------|------|---------|----------|----------|-----------|
| Day(s) Relative to Start Date                 |        |      |         |          |          |           |
| Neutrophils<br>(10 <sup>3</sup> cells/<br>µL) | 29 [g] | Mean | 1.134   | 0.886    | 0.896    | 0.788     |
|                                               |        | SD   | 0.5638  | 0.2111   | 0.3230   | 0.2704    |
|                                               |        | N    | 5       | 5        | 5        | 5         |
|                                               | 91 [g] | Mean | 0.882   | 0.824    | 0.858    | 0.962     |
|                                               |        | SD   | 0.3714  | 0.5714   | 0.3987   | 0.3358    |
|                                               |        | N    | 5       | 5        | 5        | 5         |
| Lymphocytes<br>(10 <sup>3</sup> cells/<br>µL) | 8 [g]  | Mean | 9.070   | 9.146    | 10.742   | 10.558    |
|                                               |        | SD   | 1.6969  | 1.4685   | 1.6943   | 3.9443    |
|                                               |        | N    | 5       | 5        | 5        | 5         |
|                                               | 29 [g] | Mean | 8.938   | 10.412   | 11.856   | 10.720    |
|                                               |        | SD   | 3.3951  | 1.6040   | 3.9092   | 1.6650    |
|                                               |        | N    | 5       | 5        | 5        | 5         |
|                                               | 91 [g] | Mean | 7.102   | 7.260    | 9.256    | 11.874 a  |
|                                               |        | SD   | 1.8556  | 0.5778   | 1.5897   | 3.9501    |
|                                               |        | N    | 5       | 5        | 5        | 5         |
| Monocytes<br>(10 <sup>3</sup> cells/<br>µL)   | 8 [g]  | Mean | 0.226   | 0.296    | 0.286    | 0.302     |
|                                               |        | SD   | 0.0709  | 0.1708   | 0.0907   | 0.2141    |
|                                               |        | N    | 5       | 5        | 5        | 5         |
|                                               | 29 [g] | Mean | 0.246   | 0.188    | 0.214    | 0.398     |
|                                               |        | SD   | 0.1576  | 0.0427   | 0.0313   | 0.0829    |
|                                               |        | N    | 5       | 5        | 5        | 5         |

[g] - Anova & Dunnett: a = p < 0.05

2759-001  
A Single Dose Toxicity Study of Test Article Administered by Intrathecal Injection in Rats

Summary of Hematology Values

| Sex: Female                                   |         |      | Vehicle | Low Dose | Mid Dose | High Dose |
|-----------------------------------------------|---------|------|---------|----------|----------|-----------|
| Day(s) Relative to Start Date                 |         |      |         |          |          |           |
| Monocytes<br>(10 <sup>3</sup> cells/<br>µL)   | 91 [g]  | Mean | 0.208   | 0.226    | 0.162    | 0.312     |
|                                               |         | SD   | 0.0887  | 0.1045   | 0.0740   | 0.1335    |
|                                               |         | N    | 5       | 5        | 5        | 5         |
| Eosinophils<br>(10 <sup>3</sup> cells/<br>µL) | 8 [g]   | Mean | 0.076   | 0.064    | 0.078    | 0.056     |
|                                               |         | SD   | 0.0270  | 0.0321   | 0.0415   | 0.0167    |
|                                               |         | N    | 5       | 5        | 5        | 5         |
|                                               | 29 [g1] | Mean | 0.050   | 0.106    | 0.046    | 0.062     |
|                                               |         | SD   | 0.0158  | 0.1101   | 0.0230   | 0.0205    |
|                                               |         | N    | 5       | 5        | 5        | 5         |
|                                               | 91 [g]  | Mean | 0.072   | 0.050    | 0.058    | 0.062     |
|                                               |         | SD   | 0.0239  | 0.0071   | 0.0217   | 0.0259    |
|                                               |         | N    | 5       | 5        | 5        | 5         |
| Basophils<br>(10 <sup>3</sup> cells/<br>µL)   | 8 [g1]  | Mean | 0.046   | 0.034    | 0.050    | 0.060     |
|                                               |         | SD   | 0.0167  | 0.0089   | 0.0100   | 0.0346    |
|                                               |         | N    | 5       | 5        | 5        | 5         |
|                                               | 29 [g1] | Mean | 0.052   | 0.048    | 0.058    | 0.054     |
|                                               |         | SD   | 0.0179  | 0.0179   | 0.0402   | 0.0219    |
|                                               |         | N    | 5       | 5        | 5        | 5         |
|                                               | 91 [g]  | Mean | 0.030   | 0.030    | 0.042    | 0.058     |
|                                               |         | SD   | 0.0100  | 0.0071   | 0.0217   | 0.0286    |
|                                               |         | N    | 5       | 5        | 5        | 5         |

[g] - Anova & Dunnett  
[g1] - Anova & Dunnett(Log)

2759-001  
 A Single Dose Toxicity Study of Test Article Administered by Intrathecal Injection in Rats

Summary of Hematology Values

| Sex: Female                                   |         |      | Vehicle | Low Dose | Mid Dose | High Dose |
|-----------------------------------------------|---------|------|---------|----------|----------|-----------|
| Day(s) Relative to Start Date                 |         |      |         |          |          |           |
| Other Cells<br>(10 <sup>3</sup> cells/<br>µL) | 8 [g]   | Mean | 0.126   | 0.100    | 0.124    | 0.112     |
|                                               |         | SD   | 0.0577  | 0.0394   | 0.0114   | 0.0455    |
|                                               |         | N    | 5       | 5        | 5        | 5         |
|                                               | 29 [g]  | Mean | 0.136   | 0.134    | 0.182    | 0.152     |
|                                               |         | SD   | 0.1060  | 0.0673   | 0.0746   | 0.0756    |
|                                               |         | N    | 5       | 5        | 5        | 5         |
|                                               | 91 [g1] | Mean | 0.096   | 0.106    | 0.094    | 0.122     |
|                                               |         | SD   | 0.0643  | 0.0207   | 0.0344   | 0.0669    |
|                                               |         | N    | 5       | 5        | 5        | 5         |
| RDW<br>(%)                                    | 8 [g]   | Mean | 11.74   | 11.60    | 12.00    | 11.48     |
|                                               |         | SD   | 0.416   | 0.235    | 0.406    | 0.205     |
|                                               |         | N    | 5       | 5        | 5        | 5         |
|                                               | 29 [g]  | Mean | 11.52   | 11.84    | 12.08    | 12.06     |
|                                               |         | SD   | 0.550   | 0.493    | 0.653    | 0.467     |
|                                               |         | N    | 5       | 5        | 5        | 5         |
|                                               | 91 [g]  | Mean | 11.72   | 11.50    | 12.08    | 12.08     |
|                                               |         | SD   | 0.370   | 0.374    | 0.295    | 0.576     |
|                                               |         | N    | 5       | 5        | 5        | 5         |

[g] - Anova & Dunnett  
 [g1] - Anova & Dunnett(Log)

Table 2  
Summary of Coagulation Values

Abbreviation for Coagulation Parameters

APTT - Activated Partial Thromboplastin Time

2759-001  
A Single Dose Toxicity Study of Test Article Administered by Intrathecal Injection in Rats

Summary of Coagulation Values

| Sex: Male                     |        |      | Vehicle | Low Dose | Mid Dose | High Dose |
|-------------------------------|--------|------|---------|----------|----------|-----------|
| Day(s) Relative to Start Date |        |      |         |          |          |           |
| APTT (sec)                    | 8 [g]  | Mean | 14.83   | 14.78    | 16.32    | 14.76     |
|                               |        | SD   | 2.722   | 1.132    | 1.076    | 0.152     |
|                               |        | N    | 4       | 5        | 5        | 5         |
|                               | 29 [g] | Mean | 17.33   | 16.74    | 18.14    | 15.42     |
|                               |        | SD   | 2.219   | 1.450    | 1.831    | 1.268     |
|                               |        | N    | 4       | 5        | 5        | 5         |
|                               | 91 [g] | Mean | 15.94   | 17.30    | 16.10    | 16.70     |
|                               |        | SD   | 1.698   | 2.521    | 2.423    | 2.563     |
|                               |        | N    | 5       | 5        | 5        | 5         |
| Prothrombin Time (sec)        | 8 [g1] | Mean | 16.94   | 18.50 b  | 17.72 a  | 17.22     |
|                               |        | SD   | 0.167   | 0.908    | 0.164    | 0.311     |
|                               |        | N    | 5       | 5        | 5        | 5         |
|                               | 29 [g] | Mean | 16.98   | 16.30    | 16.92    | 16.22     |
|                               |        | SD   | 0.377   | 0.406    | 0.873    | 0.864     |
|                               |        | N    | 4       | 5        | 5        | 5         |
|                               | 91 [g] | Mean | 17.48   | 17.28    | 17.90    | 17.00     |
|                               |        | SD   | 0.638   | 0.536    | 1.373    | 0.762     |
|                               |        | N    | 5       | 5        | 5        | 5         |
| Fibrinogen (mg/dL)            | 8 [g]  | Mean | 333.8   | 311.4    | 320.4    | 315.2     |
|                               |        | SD   | 32.96   | 38.94    | 16.10    | 13.55     |
|                               |        | N    | 4       | 5        | 5        | 5         |

[g] - Anova & Dunnett  
[g1] - Kruskal-Wallis & Dunn: a = p < 0.05; b = p < 0.01



2759-001  
A Single Dose Toxicity Study of Test Article Administered by Intrathecal Injection in Rats

Summary of Coagulation Values

| Sex: Male                     |        |      | Vehicle | Low Dose | Mid Dose | High Dose |
|-------------------------------|--------|------|---------|----------|----------|-----------|
| Day(s) Relative to Start Date |        |      |         |          |          |           |
| Fibrinogen (mg/dL)            | 29 [g] | Mean | 277.0   | 312.0    | 323.4 a  | 345.8 b   |
|                               |        | SD   | 20.78   | 16.23    | 26.35    | 25.92     |
|                               |        | N    | 4       | 5        | 5        | 5         |
|                               | 91 [g] | Mean | 331.4   | 312.6    | 338.2    | 364.0     |
|                               |        | SD   | 56.97   | 22.38    | 25.96    | 29.09     |
|                               |        | N    | 5       | 5        | 5        | 5         |

[g] - Anova & Dunnett: a = p < 0.05; b = p < 0.01

2759-001  
A Single Dose Toxicity Study of Test Article Administered by Intrathecal Injection in Rats

Summary of Coagulation Values

| Sex: Female                   |        |      | Vehicle | Low Dose | Mid Dose | High Dose |
|-------------------------------|--------|------|---------|----------|----------|-----------|
| Day(s) Relative to Start Date |        |      |         |          |          |           |
| APTT (sec)                    | 8 [g]  | Mean | 14.42   | 13.85    | 12.22    | 13.64     |
|                               |        | SD   | 2.087   | 1.406    | 1.983    | 1.630     |
|                               |        | N    | 5       | 4        | 5        | 5         |
|                               | 29 [g] | Mean | 16.26   | 16.42    | 16.06    | 17.66     |
|                               |        | SD   | 1.095   | 1.777    | 1.873    | 1.799     |
|                               |        | N    | 5       | 5        | 5        | 5         |
|                               | 91 [g] | Mean | 16.58   | 16.10    | 16.38    | 15.17     |
|                               |        | SD   | 2.768   | 3.434    | 2.928    | 1.159     |
|                               |        | N    | 4       | 5        | 5        | 3         |
| Prothrombin Time (sec)        | 8 [g]  | Mean | 17.48   | 17.36    | 17.20    | 16.64     |
|                               |        | SD   | 0.934   | 1.159    | 0.332    | 0.451     |
|                               |        | N    | 5       | 5        | 5        | 5         |
|                               | 29 [g] | Mean | 17.22   | 16.60    | 16.88    | 17.12     |
|                               |        | SD   | 0.311   | 0.863    | 1.001    | 0.572     |
|                               |        | N    | 5       | 5        | 5        | 5         |
|                               | 91 [g] | Mean | 17.15   | 16.74    | 17.02    | 16.23     |
|                               |        | SD   | 0.526   | 0.477    | 0.988    | 0.462     |
|                               |        | N    | 4       | 5        | 5        | 3         |
| Fibrinogen (mg/dL)            | 8 [g]  | Mean | 275.0   | 291.8    | 284.0    | 279.4     |
|                               |        | SD   | 26.11   | 26.83    | 11.40    | 27.41     |
|                               |        | N    | 5       | 5        | 5        | 5         |

[g] - Anova & Dunnett

2759-001  
 A Single Dose Toxicity Study of Test Article Administered by Intrathecal Injection in Rats

Summary of Coagulation Values

| Sex: Female                   |         |      | Vehicle | Low Dose | Mid Dose | High Dose |
|-------------------------------|---------|------|---------|----------|----------|-----------|
| Day(s) Relative to Start Date |         |      |         |          |          |           |
| Fibrinogen (mg/dL)            | 29 [g]  | Mean | 282.0   | 244.4    | 238.0    | 246.8     |
|                               |         | SD   | 50.49   | 31.58    | 28.25    | 25.71     |
|                               |         | N    | 5       | 5        | 5        | 5         |
|                               | 91 [g1] | Mean | 240.8   | 218.8    | 220.4    | 228.0     |
|                               |         | SD   | 21.61   | 5.07     | 7.92     | 23.39     |
|                               |         | N    | 4       | 5        | 5        | 3         |

[g] - Anova & Dunnett  
 [g1] - Kruskal-Wallis & Dunn

Table 3  
Summary of Clinical Chemistry Values

Abbreviations for Clinical Chemistry Parameters

- AST - Aspartate Aminotransferase
- ALT - Alanine Aminotransferase
- ALP - Alkaline Phosphatase

2759-001  
A Single Dose Toxicity Study of Test Article Administered by Intrathecal Injection in Rats

## Summary of Clinical Chemistry Values

| Sex: Male                     |        |      | Vehicle | Low Dose | Mid Dose | High Dose |
|-------------------------------|--------|------|---------|----------|----------|-----------|
| Day(s) Relative to Start Date |        |      |         |          |          |           |
| Sodium<br>(mEq/L)             | 8 [g]  | Mean | 141.2   | 143.4 a  | 141.6    | 143.4 a   |
|                               |        | SD   | 0.45    | 1.82     | 0.89     | 1.14      |
|                               |        | N    | 5       | 5        | 5        | 5         |
|                               | 29 [g] | Mean | 142.6   | 142.4    | 141.6    | 141.6     |
|                               |        | SD   | 1.52    | 1.82     | 1.67     | 0.89      |
|                               |        | N    | 5       | 5        | 5        | 5         |
|                               | 91 [g] | Mean | 141.6   | 143.6    | 140.8    | 141.6     |
|                               |        | SD   | 1.14    | 3.05     | 3.11     | 1.95      |
|                               |        | N    | 5       | 5        | 5        | 5         |
| Potassium<br>(mEq/L)          | 8 [g]  | Mean | 10.24   | 8.66     | 9.46     | 10.58     |
|                               |        | SD   | 1.412   | 1.601    | 1.455    | 1.021     |
|                               |        | N    | 5       | 5        | 5        | 5         |
|                               | 29 [g] | Mean | 11.40   | 11.90    | 10.36    | 10.04     |
|                               |        | SD   | 1.483   | 1.746    | 1.484    | 1.322     |
|                               |        | N    | 5       | 5        | 5        | 5         |
|                               | 91 [g] | Mean | 12.16   | 12.16    | 13.34    | 10.22     |
|                               |        | SD   | 1.381   | 2.961    | 3.429    | 1.217     |
|                               |        | N    | 5       | 5        | 5        | 5         |
| Chloride<br>(mEq/L)           | 8 [g]  | Mean | 100.0   | 101.6    | 100.2    | 100.2     |
|                               |        | SD   | 2.45    | 3.05     | 1.30     | 1.10      |
|                               |        | N    | 5       | 5        | 5        | 5         |

[g] - Anova &amp; Dunnett: a = p &lt; 0.05

2759-001  
A Single Dose Toxicity Study of Test Article Administered by Intrathecal Injection in Rats

## Summary of Clinical Chemistry Values

| Sex: Male                     |         |      | Vehicle | Low Dose | Mid Dose | High Dose |
|-------------------------------|---------|------|---------|----------|----------|-----------|
| Day(s) Relative to Start Date |         |      |         |          |          |           |
| Chloride<br>(mEq/L)           | 29 [g]  | Mean | 101.0   | 100.0    | 99.8     | 99.0      |
|                               |         | SD   | 2.45    | 1.87     | 1.30     | 1.73      |
|                               |         | N    | 5       | 5        | 5        | 5         |
|                               | 91 [g]  | Mean | 99.6    | 100.2    | 98.4     | 98.6      |
|                               |         | SD   | 2.07    | 1.48     | 1.52     | 1.14      |
|                               |         | N    | 5       | 5        | 5        | 5         |
| Calcium<br>(mg/dL)            | 8 [g1]  | Mean | 13.58   | 13.18    | 13.04    | 12.76     |
|                               |         | SD   | 1.180   | 0.785    | 0.251    | 0.428     |
|                               |         | N    | 5       | 5        | 5        | 5         |
|                               | 29 [g1] | Mean | 12.72   | 12.88    | 12.92    | 13.12     |
|                               |         | SD   | 0.901   | 0.497    | 0.415    | 0.268     |
|                               |         | N    | 5       | 5        | 5        | 5         |
|                               | 91 [g]  | Mean | 12.18   | 12.76    | 13.38 b  | 13.18 b   |
|                               |         | SD   | 0.327   | 0.410    | 0.563    | 0.487     |
|                               |         | N    | 5       | 5        | 5        | 5         |
| Phosphorus<br>(mg/dL)         | 8 [g]   | Mean | 14.74   | 13.46    | 14.44    | 15.22     |
|                               |         | SD   | 0.684   | 1.081    | 1.152    | 1.283     |
|                               |         | N    | 5       | 5        | 5        | 5         |
|                               | 29 [g]  | Mean | 13.18   | 14.18    | 13.56    | 13.00     |
|                               |         | SD   | 0.983   | 1.501    | 1.264    | 0.316     |
|                               |         | N    | 5       | 5        | 5        | 5         |

[g] - Anova & Dunnett:  $b = p < 0.01$ 

[g1] - Kruskal-Wallis &amp; Dunn

2759-001  
A Single Dose Toxicity Study of Test Article Administered by Intrathecal Injection in Rats

Summary of Clinical Chemistry Values

| Sex: Male                     |         |      | Vehicle | Low Dose | Mid Dose | High Dose |
|-------------------------------|---------|------|---------|----------|----------|-----------|
| Day(s) Relative to Start Date |         |      |         |          |          |           |
| Phosphorus (mg/dL)            | 91 [g]  | Mean | 13.44   | 13.54    | 14.22    | 12.12     |
|                               |         | SD   | 0.826   | 1.387    | 1.951    | 0.981     |
|                               |         | N    | 5       | 5        | 5        | 5         |
| ALP (U/L)                     | 8 [g]   | Mean | 387.0   | 317.4    | 246.0    | 306.8     |
|                               |         | SD   | 84.64   | 123.95   | 39.52    | 48.43     |
|                               |         | N    | 5       | 5        | 5        | 5         |
|                               | 29 [g]  | Mean | 186.4   | 158.8    | 180.6    | 190.8     |
|                               |         | SD   | 28.01   | 58.95    | 55.63    | 55.57     |
|                               |         | N    | 5       | 5        | 5        | 5         |
|                               | 91 [g]  | Mean | 108.4   | 105.0    | 80.8     | 97.6      |
|                               |         | SD   | 12.20   | 29.82    | 8.58     | 25.12     |
|                               |         | N    | 5       | 5        | 5        | 5         |
| Total Bilirubin (mg/dL)       | 8 [g1]  | Mean | 0.12    | 0.10     | 0.10     | 0.10      |
|                               |         | SD   | 0.045   | 0.000    | 0.000    | 0.000     |
|                               |         | N    | 5       | 5        | 5        | 5         |
|                               | 29 [g1] | Mean | 0.12    | 0.12     | 0.10     | 0.10      |
|                               |         | SD   | 0.045   | 0.045    | 0.000    | 0.000     |
|                               |         | N    | 5       | 5        | 5        | 5         |
|                               | 91 [g1] | Mean | 0.14    | 0.10     | 0.12     | 0.12      |
|                               |         | SD   | 0.055   | 0.000    | 0.045    | 0.045     |
|                               |         | N    | 5       | 5        | 5        | 5         |

[g] - Anova & Dunnett  
[g1] - Kruskal-Wallis & Dunn



2759-001  
A Single Dose Toxicity Study of Test Article Administered by Intrathecal Injection in Rats

## Summary of Clinical Chemistry Values

| Sex: Male                     |         |      | Vehicle | Low Dose | Mid Dose | High Dose |
|-------------------------------|---------|------|---------|----------|----------|-----------|
| Day(s) Relative to Start Date |         |      |         |          |          |           |
| AST<br>(U/L)                  | 8 [g]   | Mean | 89.0    | 78.6     | 74.2     | 82.6      |
|                               |         | SD   | 7.68    | 16.50    | 3.35     | 9.32      |
|                               |         | N    | 5       | 5        | 5        | 5         |
|                               | 29 [g1] | Mean | 86.0    | 75.8     | 85.6     | 82.2      |
|                               |         | SD   | 10.07   | 15.25    | 10.48    | 16.78     |
|                               |         | N    | 5       | 5        | 5        | 5         |
|                               | 91 [g1] | Mean | 194.4   | 99.2     | 131.6    | 115.8     |
|                               |         | SD   | 74.42   | 6.76     | 35.71    | 76.40     |
|                               |         | N    | 5       | 5        | 5        | 5         |
| ALT<br>(U/L)                  | 8 [g2]  | Mean | 54.4    | 52.0     | 43.6     | 49.8      |
|                               |         | SD   | 10.43   | 21.26    | 4.83     | 7.60      |
|                               |         | N    | 5       | 5        | 5        | 5         |
|                               | 29 [g1] | Mean | 40.2    | 33.2     | 38.4     | 35.6      |
|                               |         | SD   | 10.23   | 5.45     | 8.35     | 8.96      |
|                               |         | N    | 5       | 5        | 5        | 5         |
|                               | 91 [g]  | Mean | 139.8   | 52.6     | 77.4     | 73.0      |
|                               |         | SD   | 79.23   | 8.05     | 41.06    | 63.19     |
|                               |         | N    | 5       | 5        | 5        | 5         |
| Urea<br>Nitrogen<br>(mg/dL)   | 8 [g2]  | Mean | 20.0    | 17.8     | 15.0 b   | 14.0 b    |
|                               |         | SD   | 4.30    | 1.64     | 1.22     | 1.00      |
|                               |         | N    | 5       | 5        | 5        | 5         |

[g] - Kruskal-Wallis &amp; Dunn

[g1] - Anova &amp; Dunnett

[g2] - Anova &amp; Dunnett(Log): b = p &lt; 0.01

2759-001  
A Single Dose Toxicity Study of Test Article Administered by Intrathecal Injection in Rats

Summary of Clinical Chemistry Values

| Sex: Male                     |         |      | Vehicle | Low Dose | Mid Dose | High Dose |
|-------------------------------|---------|------|---------|----------|----------|-----------|
| Day(s) Relative to Start Date |         |      |         |          |          |           |
| Urea Nitrogen (mg/dL)         | 29 [g]  | Mean | 15.0    | 14.0     | 15.4     | 16.0      |
|                               |         | SD   | 2.45    | 1.87     | 1.67     | 1.22      |
|                               |         | N    | 5       | 5        | 5        | 5         |
|                               | 91 [g1] | Mean | 19.6    | 15.8     | 17.2     | 16.6      |
|                               |         | SD   | 7.57    | 0.84     | 1.64     | 1.14      |
|                               |         | N    | 5       | 5        | 5        | 5         |
| Creatinine (mg/dL)            | 8 [g1]  | Mean | 0.46    | 0.38     | 0.38     | 0.38      |
|                               |         | SD   | 0.089   | 0.045    | 0.045    | 0.045     |
|                               |         | N    | 5       | 5        | 5        | 5         |
|                               | 29 [g]  | Mean | 0.44    | 0.40     | 0.44     | 0.48      |
|                               |         | SD   | 0.055   | 0.071    | 0.055    | 0.045     |
|                               |         | N    | 5       | 5        | 5        | 5         |
|                               | 91 [g1] | Mean | 0.54    | 0.52     | 0.50     | 0.52      |
|                               |         | SD   | 0.055   | 0.045    | 0.000    | 0.045     |
|                               |         | N    | 5       | 5        | 5        | 5         |
| Total Protein (g/dL)          | 8 [g]   | Mean | 6.48    | 6.00     | 6.26     | 6.30      |
|                               |         | SD   | 0.589   | 0.255    | 0.230    | 0.141     |
|                               |         | N    | 5       | 5        | 5        | 5         |
|                               | 29 [g]  | Mean | 6.48    | 6.66     | 6.84     | 6.68      |
|                               |         | SD   | 0.228   | 0.219    | 0.321    | 0.228     |
|                               |         | N    | 5       | 5        | 5        | 5         |

[g] - Anova & Dunnett  
[g1] - Kruskal-Wallis & Dunn

2759-001  
A Single Dose Toxicity Study of Test Article Administered by Intrathecal Injection in Rats

## Summary of Clinical Chemistry Values

| Sex: Male                     |        |      | Vehicle | Low Dose | Mid Dose | High Dose |
|-------------------------------|--------|------|---------|----------|----------|-----------|
| Day(s) Relative to Start Date |        |      |         |          |          |           |
| Total Protein (g/dL)          | 91 [g] | Mean | 6.78    | 6.80     | 7.12     | 7.18 a    |
|                               |        | SD   | 0.205   | 0.100    | 0.164    | 0.311     |
|                               |        | N    | 5       | 5        | 5        | 5         |
| Albumin (g/dL)                | 8 [g]  | Mean | 3.52    | 3.34     | 3.34     | 3.40      |
|                               |        | SD   | 0.179   | 0.241    | 0.055    | 0.100     |
|                               |        | N    | 5       | 5        | 5        | 5         |
|                               | 29 [g] | Mean | 3.34    | 3.46     | 3.32     | 3.30      |
|                               |        | SD   | 0.055   | 0.134    | 0.164    | 0.071     |
|                               |        | N    | 5       | 5        | 5        | 5         |
|                               | 91 [g] | Mean | 3.30    | 3.40     | 3.40     | 3.40      |
|                               |        | SD   | 0.100   | 0.071    | 0.071    | 0.158     |
|                               |        | N    | 5       | 5        | 5        | 5         |
| Globulin (g/dL)               | 8 [g]  | Mean | 2.96    | 2.66     | 2.92     | 2.90      |
|                               |        | SD   | 0.439   | 0.089    | 0.228    | 0.071     |
|                               |        | N    | 5       | 5        | 5        | 5         |
|                               | 29 [g] | Mean | 3.14    | 3.20     | 3.52 b   | 3.38      |
|                               |        | SD   | 0.207   | 0.141    | 0.179    | 0.164     |
|                               |        | N    | 5       | 5        | 5        | 5         |
|                               | 91 [g] | Mean | 3.48    | 3.40     | 3.72     | 3.78      |
|                               |        | SD   | 0.239   | 0.100    | 0.192    | 0.259     |
|                               |        | N    | 5       | 5        | 5        | 5         |

[g] - Anova &amp; Dunnett: a = p &lt; 0.05; b = p &lt; 0.01

2759-001  
A Single Dose Toxicity Study of Test Article Administered by Intrathecal Injection in Rats

## Summary of Clinical Chemistry Values

| Sex: Male                     |        |      | Vehicle | Low Dose | Mid Dose | High Dose |
|-------------------------------|--------|------|---------|----------|----------|-----------|
| Day(s) Relative to Start Date |        |      |         |          |          |           |
| Albumin/<br>Globulin          | 8 [g]  | Mean | 1.20    | 1.26     | 1.15     | 1.17      |
|                               |        | SD   | 0.132   | 0.100    | 0.094    | 0.037     |
|                               |        | N    | 5       | 5        | 5        | 5         |
|                               | 29 [g] | Mean | 1.07    | 1.08     | 0.94 b   | 0.98 a    |
|                               |        | SD   | 0.071   | 0.053    | 0.032    | 0.033     |
|                               |        | N    | 5       | 5        | 5        | 5         |
|                               | 91 [g] | Mean | 0.95    | 1.00     | 0.92     | 0.90      |
|                               |        | SD   | 0.084   | 0.042    | 0.060    | 0.072     |
|                               |        | N    | 5       | 5        | 5        | 5         |
| Triglyceride<br>(mg/dL)       | 8 [g1] | Mean | 116.0   | 61.6 b   | 66.4 b   | 57.6 b    |
|                               |        | SD   | 34.18   | 8.68     | 9.10     | 15.66     |
|                               |        | N    | 5       | 5        | 5        | 5         |
|                               | 29 [g] | Mean | 84.4    | 65.2     | 69.4     | 69.2      |
|                               |        | SD   | 13.35   | 15.02    | 21.05    | 43.09     |
|                               |        | N    | 5       | 5        | 5        | 5         |
|                               | 91 [g] | Mean | 82.4    | 73.2     | 117.8    | 77.6      |
|                               |        | SD   | 23.56   | 22.88    | 50.05    | 11.97     |
|                               |        | N    | 5       | 5        | 5        | 5         |
| Cholesterol<br>(mg/dL)        | 8 [g]  | Mean | 67.2    | 69.8     | 81.2     | 74.2      |
|                               |        | SD   | 3.96    | 12.64    | 17.05    | 11.65     |
|                               |        | N    | 5       | 5        | 5        | 5         |

[g] - Anova &amp; Dunnett: a = p &lt; 0.05; b = p &lt; 0.01

[g1] - Anova &amp; Dunnett(Log): b = p &lt; 0.01

2759-001  
A Single Dose Toxicity Study of Test Article Administered by Intrathecal Injection in Rats

Summary of Clinical Chemistry Values

| Sex: Male                     |         |      | Vehicle | Low Dose | Mid Dose | High Dose |
|-------------------------------|---------|------|---------|----------|----------|-----------|
| Day(s) Relative to Start Date |         |      |         |          |          |           |
| Cholesterol (mg/dL)           | 29 [g]  | Mean | 50.0    | 72.0     | 63.4     | 71.6      |
|                               |         | SD   | 11.98   | 16.17    | 5.94     | 14.91     |
|                               |         | N    | 5       | 5        | 5        | 5         |
|                               | 91 [g]  | Mean | 74.8    | 78.0     | 74.0     | 82.4      |
|                               |         | SD   | 21.81   | 16.39    | 6.40     | 18.73     |
|                               |         | N    | 5       | 5        | 5        | 5         |
| Glucose (mg/dL)               | 8 [g]   | Mean | 410.8   | 350.2    | 293.2    | 181.2     |
|                               |         | SD   | 223.05  | 64.12    | 118.01   | 81.77     |
|                               |         | N    | 5       | 5        | 5        | 5         |
|                               | 29 [g1] | Mean | 362.4   | 339.4    | 351.0    | 364.2     |
|                               |         | SD   | 233.92  | 85.96    | 119.50   | 102.25    |
|                               |         | N    | 5       | 5        | 5        | 5         |
|                               | 91 [g]  | Mean | 315.2   | 314.2    | 403.2    | 423.2     |
|                               |         | SD   | 90.05   | 73.49    | 106.35   | 71.84     |
|                               |         | N    | 5       | 5        | 5        | 5         |

[g] - Anova & Dunnett  
[g1] - Anova & Dunnett(Log)

2759-001  
A Single Dose Toxicity Study of Test Article Administered by Intrathecal Injection in Rats

Summary of Clinical Chemistry Values

| Sex: Female                   |        |      | Vehicle | Low Dose | Mid Dose | High Dose |
|-------------------------------|--------|------|---------|----------|----------|-----------|
| Day(s) Relative to Start Date |        |      |         |          |          |           |
| Sodium<br>(mEq/L)             | 8 [g]  | Mean | 141.4   | 139.4    | 140.0    | 139.6     |
|                               |        | SD   | 1.34    | 1.52     | 1.58     | 1.52      |
|                               |        | N    | 5       | 5        | 5        | 5         |
|                               | 29 [g] | Mean | 140.0   | 139.0    | 138.8    | 136.8     |
|                               |        | SD   | 2.24    | 4.06     | 2.59     | 3.03      |
|                               |        | N    | 5       | 5        | 5        | 5         |
|                               | 91 [g] | Mean | 140.2   | 139.8    | 141.6    | 139.0     |
|                               |        | SD   | 2.77    | 0.84     | 1.95     | 2.00      |
|                               |        | N    | 5       | 5        | 5        | 5         |
| Potassium<br>(mEq/L)          | 8 [g]  | Mean | 10.26   | 11.28    | 10.40    | 11.52     |
|                               |        | SD   | 0.669   | 1.585    | 0.678    | 0.576     |
|                               |        | N    | 5       | 5        | 5        | 5         |
|                               | 29 [g] | Mean | 12.02   | 12.68    | 12.56    | 13.64     |
|                               |        | SD   | 2.283   | 3.981    | 2.012    | 1.729     |
|                               |        | N    | 5       | 5        | 5        | 5         |
|                               | 91 [g] | Mean | 13.72   | 11.72    | 12.52    | 12.08     |
|                               |        | SD   | 1.890   | 1.110    | 2.086    | 4.091     |
|                               |        | N    | 5       | 5        | 5        | 5         |
| Chloride<br>(mEq/L)           | 8 [g]  | Mean | 102.0   | 101.0    | 102.2    | 101.4     |
|                               |        | SD   | 2.12    | 1.58     | 1.10     | 0.89      |
|                               |        | N    | 5       | 5        | 5        | 5         |

[g] - Anova & Dunnett

2759-001  
A Single Dose Toxicity Study of Test Article Administered by Intrathecal Injection in Rats

Summary of Clinical Chemistry Values

| Sex: Female                   |         |      | Vehicle | Low Dose | Mid Dose | High Dose |
|-------------------------------|---------|------|---------|----------|----------|-----------|
| Day(s) Relative to Start Date |         |      |         |          |          |           |
| Chloride<br>(mEq/L)           | 29 [g]  | Mean | 102.2   | 100.2    | 100.6    | 102.2     |
|                               |         | SD   | 1.64    | 1.10     | 1.14     | 2.28      |
|                               |         | N    | 5       | 5        | 5        | 5         |
|                               | 91 [g]  | Mean | 101.8   | 98.8     | 101.6    | 100.0     |
|                               |         | SD   | 2.49    | 2.17     | 0.89     | 2.24      |
|                               |         | N    | 5       | 5        | 5        | 5         |
| Calcium<br>(mg/dL)            | 8 [g]   | Mean | 12.88   | 13.18    | 12.44    | 12.90     |
|                               |         | SD   | 0.476   | 0.370    | 0.462    | 0.886     |
|                               |         | N    | 5       | 5        | 5        | 5         |
|                               | 29 [g]  | Mean | 12.62   | 12.92    | 13.12    | 12.64     |
|                               |         | SD   | 0.349   | 0.383    | 0.630    | 0.513     |
|                               |         | N    | 5       | 5        | 5        | 5         |
|                               | 91 [g]  | Mean | 12.78   | 13.08    | 13.14    | 13.32     |
|                               |         | SD   | 0.497   | 0.576    | 0.586    | 0.593     |
|                               |         | N    | 5       | 5        | 5        | 5         |
| Phosphorus<br>(mg/dL)         | 8 [g]   | Mean | 13.82   | 14.20    | 14.00    | 14.28     |
|                               |         | SD   | 0.887   | 1.687    | 0.495    | 1.232     |
|                               |         | N    | 5       | 5        | 5        | 5         |
|                               | 29 [g1] | Mean | 13.52   | 14.68    | 13.52    | 12.98     |
|                               |         | SD   | 1.374   | 3.031    | 1.089    | 0.769     |
|                               |         | N    | 5       | 5        | 5        | 5         |

[g] - Anova & Dunnett  
[g1] - Kruskal-Wallis & Dunn

2759-001  
A Single Dose Toxicity Study of Test Article Administered by Intrathecal Injection in Rats

Summary of Clinical Chemistry Values

| Sex: Female                   |         |      | Vehicle | Low Dose | Mid Dose | High Dose |
|-------------------------------|---------|------|---------|----------|----------|-----------|
| Day(s) Relative to Start Date |         |      |         |          |          |           |
| Phosphorus (mg/dL)            | 91 [g]  | Mean | 13.36   | 13.56    | 12.66    | 12.26     |
|                               |         | SD   | 1.001   | 2.532    | 2.186    | 2.802     |
|                               |         | N    | 5       | 5        | 5        | 5         |
| ALP (U/L)                     | 8 [g]   | Mean | 186.4   | 173.0    | 186.2    | 168.8     |
|                               |         | SD   | 40.32   | 15.35    | 38.82    | 22.38     |
|                               |         | N    | 5       | 5        | 5        | 5         |
|                               | 29 [g]  | Mean | 149.2   | 101.8    | 123.6    | 91.6 a    |
|                               |         | SD   | 47.04   | 24.54    | 24.42    | 15.47     |
|                               |         | N    | 5       | 5        | 5        | 5         |
|                               | 91 [g]  | Mean | 52.0    | 44.2     | 48.2     | 38.0      |
|                               |         | SD   | 13.11   | 10.99    | 15.87    | 7.07      |
|                               |         | N    | 5       | 5        | 5        | 5         |
| Total Bilirubin (mg/dL)       | 8 [g1]  | Mean | 0.10    | 0.10     | 0.10     | 0.12      |
|                               |         | SD   | 0.000   | 0.000    | 0.000    | 0.045     |
|                               |         | N    | 5       | 5        | 5        | 5         |
|                               | 29 [g1] | Mean | 0.16    | 0.18     | 0.16     | 0.20      |
|                               |         | SD   | 0.055   | 0.045    | 0.055    | 0.000     |
|                               |         | N    | 5       | 5        | 5        | 5         |
|                               | 91 [g1] | Mean | 0.14    | 0.20     | 0.18     | 0.16      |
|                               |         | SD   | 0.055   | 0.000    | 0.045    | 0.055     |
|                               |         | N    | 5       | 5        | 5        | 5         |

[g] - Anova & Dunnett: a = p < 0.05  
[g1] - Kruskal-Wallis & Dunn



2759-001  
A Single Dose Toxicity Study of Test Article Administered by Intrathecal Injection in Rats

## Summary of Clinical Chemistry Values

| Sex: Female                   |         |      | Vehicle | Low Dose | Mid Dose | High Dose |
|-------------------------------|---------|------|---------|----------|----------|-----------|
| Day(s) Relative to Start Date |         |      |         |          |          |           |
| AST<br>(U/L)                  | 8 [g]   | Mean | 67.0    | 82.0     | 75.6     | 70.6      |
|                               |         | SD   | 7.48    | 13.78    | 3.36     | 7.80      |
|                               |         | N    | 5       | 5        | 5        | 5         |
|                               | 29 [g1] | Mean | 85.6    | 122.6    | 76.6     | 75.6      |
|                               |         | SD   | 21.89   | 89.32    | 10.50    | 16.23     |
|                               |         | N    | 5       | 5        | 5        | 5         |
|                               | 91 [g2] | Mean | 98.8    | 154.8    | 78.0     | 103.6     |
|                               |         | SD   | 28.40   | 84.15    | 21.31    | 36.20     |
|                               |         | N    | 5       | 5        | 5        | 5         |
| ALT<br>(U/L)                  | 8 [g2]  | Mean | 36.8    | 42.4     | 49.0     | 38.6      |
|                               |         | SD   | 12.44   | 13.90    | 12.71    | 16.83     |
|                               |         | N    | 5       | 5        | 5        | 5         |
|                               | 29 [g1] | Mean | 57.8    | 46.6     | 30.8     | 28.6 a    |
|                               |         | SD   | 45.39   | 22.94    | 8.17     | 4.51      |
|                               |         | N    | 5       | 5        | 5        | 5         |
|                               | 91 [g2] | Mean | 57.8    | 57.6     | 39.6     | 49.6      |
|                               |         | SD   | 18.46   | 21.24    | 15.52    | 8.44      |
|                               |         | N    | 5       | 5        | 5        | 5         |
| Urea<br>Nitrogen<br>(mg/dL)   | 8 [g2]  | Mean | 17.0    | 18.0     | 16.8     | 15.4      |
|                               |         | SD   | 3.16    | 4.58     | 3.96     | 1.82      |
|                               |         | N    | 5       | 5        | 5        | 5         |

[g] - Anova &amp; Dunnett(Log)

[g1] - Kruskal-Wallis &amp; Dunn: a = p &lt; 0.05

[g2] - Anova &amp; Dunnett

2759-001  
A Single Dose Toxicity Study of Test Article Administered by Intrathecal Injection in Rats

## Summary of Clinical Chemistry Values

| Sex: Female                   |        |      | Vehicle | Low Dose | Mid Dose | High Dose |
|-------------------------------|--------|------|---------|----------|----------|-----------|
| Day(s) Relative to Start Date |        |      |         |          |          |           |
| Urea Nitrogen (mg/dL)         | 29 [g] | Mean | 17.8    | 15.4     | 14.8     | 16.8      |
|                               |        | SD   | 2.59    | 1.14     | 3.42     | 1.48      |
|                               |        | N    | 5       | 5        | 5        | 5         |
|                               | 91 [g] | Mean | 15.4    | 16.0     | 15.4     | 16.0      |
|                               |        | SD   | 2.30    | 4.12     | 1.52     | 1.58      |
|                               |        | N    | 5       | 5        | 5        | 5         |
| Creatinine (mg/dL)            | 8 [g]  | Mean | 0.38    | 0.44     | 0.32     | 0.40      |
|                               |        | SD   | 0.084   | 0.055    | 0.045    | 0.071     |
|                               |        | N    | 5       | 5        | 5        | 5         |
|                               | 29 [g] | Mean | 0.58    | 0.52     | 0.58     | 0.52      |
|                               |        | SD   | 0.084   | 0.084    | 0.084    | 0.045     |
|                               |        | N    | 5       | 5        | 5        | 5         |
|                               | 91 [g] | Mean | 0.58    | 0.58     | 0.54     | 0.56      |
|                               |        | SD   | 0.045   | 0.084    | 0.055    | 0.055     |
|                               |        | N    | 5       | 5        | 5        | 5         |
| Total Protein (g/dL)          | 8 [g]  | Mean | 6.38    | 6.80     | 6.44     | 6.82      |
|                               |        | SD   | 0.110   | 0.447    | 0.114    | 0.390     |
|                               |        | N    | 5       | 5        | 5        | 5         |
|                               | 29 [g] | Mean | 7.16    | 7.84 a   | 7.82 a   | 7.64      |
|                               |        | SD   | 0.378   | 0.261    | 0.342    | 0.351     |
|                               |        | N    | 5       | 5        | 5        | 5         |

[g] - Anova &amp; Dunnett: a = p &lt; 0.05

2759-001  
A Single Dose Toxicity Study of Test Article Administered by Intrathecal Injection in Rats

## Summary of Clinical Chemistry Values

| Sex: Female                   |        |      | Vehicle | Low Dose | Mid Dose | High Dose |
|-------------------------------|--------|------|---------|----------|----------|-----------|
| Day(s) Relative to Start Date |        |      |         |          |          |           |
| Total Protein (g/dL)          | 91 [g] | Mean | 7.54    | 8.16     | 7.82     | 8.12      |
|                               |        | SD   | 0.513   | 0.669    | 0.920    | 0.614     |
|                               |        | N    | 5       | 5        | 5        | 5         |
| Albumin (g/dL)                | 8 [g]  | Mean | 3.62    | 3.78     | 3.58     | 3.78      |
|                               |        | SD   | 0.192   | 0.164    | 0.148    | 0.130     |
|                               |        | N    | 5       | 5        | 5        | 5         |
|                               | 29 [g] | Mean | 3.82    | 4.18     | 4.16     | 4.00      |
|                               |        | SD   | 0.259   | 0.217    | 0.207    | 0.141     |
|                               |        | N    | 5       | 5        | 5        | 5         |
|                               | 91 [g] | Mean | 4.00    | 4.44     | 4.16     | 4.30      |
|                               |        | SD   | 0.255   | 0.313    | 0.541    | 0.430     |
|                               |        | N    | 5       | 5        | 5        | 5         |
| Globulin (g/dL)               | 8 [g]  | Mean | 2.76    | 3.02     | 2.86     | 3.04      |
|                               |        | SD   | 0.114   | 0.319    | 0.207    | 0.344     |
|                               |        | N    | 5       | 5        | 5        | 5         |
|                               | 29 [g] | Mean | 3.34    | 3.66 a   | 3.66 a   | 3.64 a    |
|                               |        | SD   | 0.152   | 0.055    | 0.182    | 0.270     |
|                               |        | N    | 5       | 5        | 5        | 5         |
|                               | 91 [g] | Mean | 3.54    | 3.72     | 3.66     | 3.82      |
|                               |        | SD   | 0.261   | 0.390    | 0.416    | 0.259     |
|                               |        | N    | 5       | 5        | 5        | 5         |

[g] - Anova &amp; Dunnett: a = p &lt; 0.05

2759-001  
 A Single Dose Toxicity Study of Test Article Administered by Intrathecal Injection in Rats

Summary of Clinical Chemistry Values

| Sex: Female                   |        |      | Vehicle | Low Dose | Mid Dose | High Dose |
|-------------------------------|--------|------|---------|----------|----------|-----------|
| Day(s) Relative to Start Date |        |      |         |          |          |           |
| Albumin/<br>Globulin          | 8 [g]  | Mean | 1.32    | 1.26     | 1.26     | 1.26      |
|                               |        | SD   | 0.122   | 0.110    | 0.141    | 0.151     |
|                               |        | N    | 5       | 5        | 5        | 5         |
|                               | 29 [g] | Mean | 1.14    | 1.14     | 1.14     | 1.10      |
|                               |        | SD   | 0.057   | 0.048    | 0.053    | 0.083     |
|                               |        | N    | 5       | 5        | 5        | 5         |
|                               | 91 [g] | Mean | 1.13    | 1.20     | 1.14     | 1.13      |
|                               |        | SD   | 0.020   | 0.073    | 0.075    | 0.091     |
|                               |        | N    | 5       | 5        | 5        | 5         |
| Triglyceride<br>(mg/dL)       | 8 [g]  | Mean | 45.2    | 58.0     | 49.8     | 46.6      |
|                               |        | SD   | 9.93    | 5.10     | 5.26     | 17.04     |
|                               |        | N    | 5       | 5        | 5        | 5         |
|                               | 29 [g] | Mean | 56.0    | 53.6     | 58.0     | 54.2      |
|                               |        | SD   | 14.09   | 18.35    | 12.81    | 8.26      |
|                               |        | N    | 5       | 5        | 5        | 5         |
|                               | 91 [g] | Mean | 60.2    | 66.6     | 60.0     | 93.2      |
|                               |        | SD   | 8.90    | 18.09    | 8.25     | 40.69     |
|                               |        | N    | 5       | 5        | 5        | 5         |
| Cholesterol<br>(mg/dL)        | 8 [g]  | Mean | 67.4    | 77.6     | 71.0     | 76.4      |
|                               |        | SD   | 8.32    | 10.88    | 18.59    | 22.03     |
|                               |        | N    | 5       | 5        | 5        | 5         |

[g] - Anova & Dunnett

2759-001  
A Single Dose Toxicity Study of Test Article Administered by Intrathecal Injection in Rats

Summary of Clinical Chemistry Values

| Sex: Female                   |        |      | Vehicle | Low Dose | Mid Dose | High Dose |
|-------------------------------|--------|------|---------|----------|----------|-----------|
| Day(s) Relative to Start Date |        |      |         |          |          |           |
| Cholesterol (mg/dL)           | 29 [g] | Mean | 64.2    | 76.6     | 68.0     | 64.6      |
|                               |        | SD   | 9.18    | 24.61    | 21.82    | 12.58     |
|                               |        | N    | 5       | 5        | 5        | 5         |
|                               | 91 [g] | Mean | 72.6    | 81.6     | 81.0     | 78.4      |
|                               |        | SD   | 9.53    | 18.08    | 20.80    | 23.60     |
|                               |        | N    | 5       | 5        | 5        | 5         |
| Glucose (mg/dL)               | 8 [g]  | Mean | 302.4   | 341.4    | 237.2    | 211.4     |
|                               |        | SD   | 86.79   | 145.33   | 111.56   | 165.79    |
|                               |        | N    | 5       | 5        | 5        | 5         |
|                               | 29 [g] | Mean | 217.2   | 229.8    | 210.2    | 181.4     |
|                               |        | SD   | 67.64   | 112.84   | 72.19    | 75.95     |
|                               |        | N    | 5       | 5        | 5        | 5         |
|                               | 91 [g] | Mean | 190.6   | 244.0    | 226.0    | 245.8     |
|                               |        | SD   | 80.27   | 99.46    | 61.40    | 86.29     |
|                               |        | N    | 5       | 5        | 5        | 5         |

[g] - Anova & Dunnett

Appendix 1  
Individual Hematology Values

**Manual Evaluation – Blood Cell Morphology:****All Parameters:**

|                              |   |   |                                  |
|------------------------------|---|---|----------------------------------|
| <u>Multi-species Ranges:</u> | 0 | - | Does not meet reporting criteria |
|------------------------------|---|---|----------------------------------|

**Echinocyte (Burr Cells):**

|                              |    |   |            |
|------------------------------|----|---|------------|
| <u>Multi-species Ranges:</u> | 3+ | - | ≥100 cells |
|------------------------------|----|---|------------|

**Acanthocyte, Spherocyte, Schistocyte, Keratocyte or Blister Cell, and Howell-Jolly Bodies:**

|                              |    |   |            |
|------------------------------|----|---|------------|
| <u>Multi-species Ranges:</u> | 1+ | - | 2-5 cells  |
|                              | 2+ | - | 6-10 cells |
|                              | 3+ | - | ≥11 cells  |

**Polychromasia:**

|                              |    |   |             |
|------------------------------|----|---|-------------|
| <u>Multi-species Ranges:</u> | 1+ | - | 4-12 cells  |
|                              | 2+ | - | 13-25 cells |
|                              | 3+ | - | ≥26 cells   |

**Basophilic Stippling, Pappenheimer Bodies, Heinz Bodies, Eccentrocytes, and Ghost Cells:**

|                              |    |   |            |
|------------------------------|----|---|------------|
| <u>Multi-species Ranges:</u> | 1+ | - | 1-3 cells  |
|                              | 2+ | - | 4-10 cells |
|                              | 3+ | - | ≥11 cells  |

**Unclassified Poikilocytosis:**

|                              |    |   |             |
|------------------------------|----|---|-------------|
| <u>Multi-species Ranges:</u> | 1+ | - | 3-10 cells  |
|                              | 2+ | - | 11-20 cells |
|                              | 3+ | - | ≥21 cells   |

Codes for Individual Hematology Values

- MCV - Mean Corpuscular Volume
- MCH - Mean Corpuscular Hemoglobin
- MCHC - Mean Corpuscular Hemoglobin Concentration
- RDW - Red Blood Cell Distribution Width

Blood Cell Morphology Parameters

- RBC - Red blood cell = Erythrocyte
- Poik - Poikilocytes
- NCC - Neutrophil Cytoplasmic Change
- CAC - Consistent with automated count



2759-001  
A Single Dose Toxicity Study of Test Article Administered by Intrathecal Injection in Rats

Individual Hematology Values

Sex: Male

| Vehicle                       |    | Leukocytes                     | Erythrocytes                   | Hemoglobin | Hematocrit | MCV  | MCH  |
|-------------------------------|----|--------------------------------|--------------------------------|------------|------------|------|------|
| Day(s) Relative to Start Date |    | (10 <sup>3</sup> cells/<br>μL) | (10 <sup>6</sup> cells/<br>μL) | (g/dL)     | (%)        | (fL) | (pg) |
| 1001                          | 91 | 13.3                           | 9.50                           | 16.7       | 55.0       | 57.9 | 17.5 |
| 1002                          | 91 | 10.7                           | 9.29                           | 16.9       | 56.8       | 61.1 | 18.2 |
| 1003                          | 91 | 10.0                           | 9.66                           | 16.9       | 54.4       | 56.3 | 17.5 |
| 1004                          | 91 | 10.1                           | 8.93                           | 16.0       | 51.8       | 58.1 | 17.9 |
| 1005                          | 91 | 14.7                           | 8.97                           | 15.7       | 50.4       | 56.2 | 17.5 |
| 1006                          | 8  | 13.0                           | 7.31                           | 15.1       | 52.8       | 72.3 | 20.6 |
| 1007                          | 8  | 12.4                           | 8.38                           | 17.0       | 58.8       | 70.2 | 20.2 |
| 1008                          | 8  | 13.2                           | 7.78                           | 15.6       | 51.5       | 66.2 | 20.1 |
| 1009                          | 8  | 13.9                           | 8.10                           | 16.1       | 55.5       | 68.6 | 19.8 |
| 1010                          | 8  | 14.2                           | 7.73                           | 15.7       | 54.6       | 70.6 | 20.3 |
| 1011                          | 29 | 10.8                           | 8.76                           | 16.2       | 50.5       | 57.6 | 18.5 |
| 1012                          | 29 | 10.5                           | 9.43                           | 18.6       | 59.6       | 63.2 | 19.7 |
| 1013                          | 29 | 12.9                           | 8.98                           | 18.5       | 58.1       | 64.7 | 20.6 |
| 1014                          | 29 | 11.1                           | 9.59                           | 18.4       | 57.4       | 59.9 | 19.2 |
| 1015                          | 29 | 12.9                           | 9.47                           | 17.8       | 58.3       | 61.5 | 18.8 |

|  |
|--|
|  |
|--|

2759-001  
A Single Dose Toxicity Study of Test Article Administered by Intrathecal Injection in Rats

Individual Hematology Values

Sex: Male

| Vehicle                       |    | MCHC   | Platelets                      | Absolute Reticulocyte          | Neutrophils                    | Lymphocytes                    | Monocytes                      |
|-------------------------------|----|--------|--------------------------------|--------------------------------|--------------------------------|--------------------------------|--------------------------------|
| Day(s) Relative to Start Date |    | (g/dL) | (10 <sup>3</sup> cells/<br>μL) | (10 <sup>3</sup> cells/<br>μL) | (10 <sup>3</sup> cells/<br>μL) | (10 <sup>3</sup> cells/<br>μL) | (10 <sup>3</sup> cells/<br>μL) |
| 1001                          | 91 | 30.3   | 880                            | 173.7                          | 1.73                           | 11.04                          | 0.31                           |
| 1002                          | 91 | 29.8   | 1067                           | 198.1                          | 0.94                           | 9.02                           | 0.41                           |
| 1003                          | 91 | 31.1   | 836                            | 151.0                          | 2.13                           | 7.31                           | 0.22                           |
| 1004                          | 91 | 30.9   | 846                            | 177.5                          | 1.96                           | 7.43                           | 0.36                           |
| 1005                          | 91 | 31.2   | 1173                           | 168.5                          | 4.76                           | 9.25                           | 0.33                           |
| 1006                          | 8  | 28.5   | 1310                           | 475.8                          | 1.43                           | 10.82                          | 0.45                           |
| 1007                          | 8  | 28.9   | 1033                           | 396.6                          | 1.78                           | 10.05                          | 0.39                           |
| 1008                          | 8  | 30.3   | 1294                           | 423.7                          | 1.41                           | 11.18                          | 0.40                           |
| 1009                          | 8  | 28.9   | 1372                           | 416.4                          | 1.60                           | 11.73                          | 0.31                           |
| 1010                          | 8  | 28.8   | 1352                           | 438.4                          | 2.19                           | 11.53                          | 0.25                           |
| 1011                          | 29 | 32.1   | 1168                           | 170.9                          | 1.12                           | 9.23                           | 0.16                           |
| 1012                          | 29 | 31.2   | 1185                           | 246.0                          | 1.39                           | 8.74                           | 0.13                           |
| 1013                          | 29 | 31.8   | 921                            | 257.3                          | 1.92                           | 10.41                          | 0.34                           |
| 1014                          | 29 | 32.1   | 557                            | 255.4                          | 1.61                           | 8.93                           | 0.20                           |
| 1015                          | 29 | 30.6   | 1002                           | 276.8                          | 1.78                           | 10.68                          | 0.14                           |

|  |
|--|
|  |
|--|

2759-001  
A Single Dose Toxicity Study of Test Article Administered by Intrathecal Injection in Rats

Individual Hematology Values

Sex: Male

| Vehicle                       |    | Eosinophils                    | Basophils                      | Other Cells                    | RDW  |
|-------------------------------|----|--------------------------------|--------------------------------|--------------------------------|------|
| Day(s) Relative to Start Date |    | (10 <sup>3</sup> cells/<br>μL) | (10 <sup>3</sup> cells/<br>μL) | (10 <sup>3</sup> cells/<br>μL) | (%)  |
| 1001                          | 91 | 0.09                           | 0.06                           | 0.05                           | 12.7 |
| 1002                          | 91 | 0.09                           | 0.06                           | 0.15                           | 12.1 |
| 1003                          | 91 | 0.07                           | 0.06                           | 0.17                           | 13.0 |
| 1004                          | 91 | 0.11                           | 0.03                           | 0.24                           | 12.8 |
| 1005                          | 91 | 0.11                           | 0.09                           | 0.12                           | 12.9 |
| 1006                          | 8  | 0.03                           | 0.08                           | 0.13                           | 13.0 |
| 1007                          | 8  | 0.08                           | 0.04                           | 0.06                           | 12.9 |
| 1008                          | 8  | 0.06                           | 0.06                           | 0.07                           | 13.9 |
| 1009                          | 8  | 0.07                           | 0.09                           | 0.11                           | 13.6 |
| 1010                          | 8  | 0.06                           | 0.06                           | 0.10                           | 12.9 |
| 1011                          | 29 | 0.14                           | 0.06                           | 0.14                           | 11.9 |
| 1012                          | 29 | 0.11                           | 0.05                           | 0.07                           | 12.9 |
| 1013                          | 29 | 0.08                           | 0.07                           | 0.11                           | 11.8 |
| 1014                          | 29 | 0.22                           | 0.05                           | 0.09                           | 12.2 |
| 1015                          | 29 | 0.11                           | 0.07                           | 0.07                           | 12.5 |

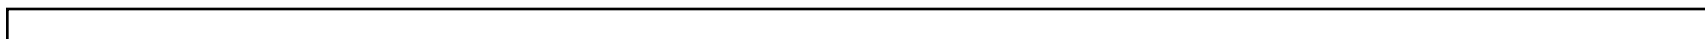

2759-001  
A Single Dose Toxicity Study of Test Article Administered by Intrathecal Injection in Rats

Individual Hematology Values

Sex: Male

| Low Dose                      |    |                                |                                |            |            |      |      |
|-------------------------------|----|--------------------------------|--------------------------------|------------|------------|------|------|
|                               |    | Leukocytes                     | Erythrocytes                   | Hemoglobin | Hematocrit | MCV  | MCH  |
| Day(s) Relative to Start Date |    | (10 <sup>3</sup> cells/<br>μL) | (10 <sup>6</sup> cells/<br>μL) | (g/dL)     | (%)        | (fL) | (pg) |
| 2001                          | 91 | 13.3                           | 10.95                          | 19.0       | 61.2       | 55.9 | 17.3 |
| 2002                          | 91 | 13.9                           | 10.06                          | 17.0       | 54.7       | 54.4 | 16.9 |
| 2003                          | 91 | 10.3                           | 9.77                           | 16.9       | 54.3       | 55.6 | 17.3 |
| 2004                          | 91 | 13.1                           | 8.83                           | 15.8       | 48.7       | 55.1 | 17.9 |
| 2005                          | 91 | 10.5                           | 10.19                          | 17.5       | 55.6       | 54.6 | 17.2 |
| 2006                          | 8  | 13.9                           | 8.33                           | 16.7       | 58.1       | 69.8 | 20.0 |
| 2007                          | 8  | 13.7                           | 6.97                           | 15.1       | 51.3       | 73.6 | 21.7 |
| 2008                          | 8  | 18.9                           | 7.46                           | 15.2       | 50.9       | 68.3 | 20.4 |
| 2009                          | 8  | 11.1                           | 7.76                           | 15.2       | 50.9       | 65.6 | 19.6 |
| 2010                          | 8  | 16.1                           | 8.45                           | 17.1       | 55.6       | 65.9 | 20.3 |
| 2011                          | 29 | 8.7                            | 9.56                           | 18.1       | 59.5       | 62.3 | 18.9 |
| 2012                          | 29 | 14.2                           | 8.98                           | 17.3       | 55.6       | 61.9 | 19.2 |
| 2013                          | 29 | 10.6                           | 9.21                           | 16.9       | 55.2       | 60.0 | 18.3 |
| 2014                          | 29 | 11.2                           | 9.15                           | 17.8       | 55.5       | 60.6 | 19.4 |
| 2015                          | 29 | 11.6                           | 8.67                           | 17.2       | 53.8       | 62.1 | 19.8 |

|  |
|--|
|  |
|--|

2759-001  
A Single Dose Toxicity Study of Test Article Administered by Intrathecal Injection in Rats

Individual Hematology Values

Sex: Male

| Low Dose |    | MCHC<br>(g/dL) | Platelets<br>(10 <sup>3</sup> cells/<br>µL) | Absolute<br>Reticulocyte<br>(10 <sup>3</sup> cells/<br>µL) | Neutrophils<br>(10 <sup>3</sup> cells/<br>µL) | Lymphocytes<br>(10 <sup>3</sup> cells/<br>µL) | Monocytes<br>(10 <sup>3</sup> cells/<br>µL) |
|----------|----|----------------|---------------------------------------------|------------------------------------------------------------|-----------------------------------------------|-----------------------------------------------|---------------------------------------------|
|          |    |                |                                             |                                                            |                                               |                                               |                                             |
| 2001     | 91 | 31.0           | 958                                         | 194.3                                                      | 1.42                                          | 11.20                                         | 0.33                                        |
| 2002     | 91 | 31.1           | 1365                                        | 215.6                                                      | 1.59                                          | 11.73                                         | 0.23                                        |
| 2003     | 91 | 31.0           | 1048                                        | 186.9                                                      | 0.84                                          | 9.11                                          | 0.14                                        |
| 2004     | 91 | 32.5           | 1274                                        | 172.8                                                      | 1.46                                          | 10.92                                         | 0.33                                        |
| 2005     | 91 | 31.5           | 966                                         | 163.5                                                      | 1.26                                          | 8.59                                          | 0.26                                        |
| 2006     | 8  | 28.7           | 1404                                        | 406.0                                                      | 1.20                                          | 12.00                                         | 0.53                                        |
| 2007     | 8  | 29.5           | 1313                                        | 448.7                                                      | 1.31                                          | 11.97                                         | 0.22                                        |
| 2008     | 8  | 29.8           | 1576                                        | 435.8                                                      | 1.68                                          | 16.26                                         | 0.75                                        |
| 2009     | 8  | 29.9           | 1340                                        | 431.9                                                      | 1.48                                          | 9.03                                          | 0.33                                        |
| 2010     | 8  | 30.8           | 1229                                        | 485.7                                                      | 2.03                                          | 13.41                                         | 0.29                                        |
| 2011     | 29 | 30.3           | 1152                                        | 294.0                                                      | 1.49                                          | 6.88                                          | 0.18                                        |
| 2012     | 29 | 31.1           | 1202                                        | 229.3                                                      | 1.57                                          | 12.00                                         | 0.35                                        |
| 2013     | 29 | 30.6           | 1054                                        | 250.7                                                      | 1.10                                          | 8.94                                          | 0.27                                        |
| 2014     | 29 | 32.0           | 949                                         | 160.1                                                      | 1.16                                          | 9.44                                          | 0.41                                        |
| 2015     | 29 | 31.9           | 1213                                        | 211.6                                                      | 0.85                                          | 10.15                                         | 0.29                                        |

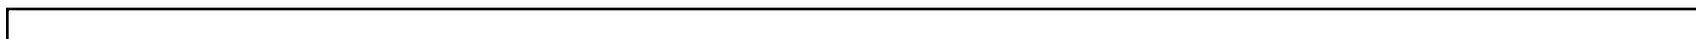

2759-001  
A Single Dose Toxicity Study of Test Article Administered by Intrathecal Injection in Rats

Individual Hematology Values

Sex: Male

| Low Dose                      |    | Eosinophils                    | Basophils                      | Other Cells                    | RDW  |
|-------------------------------|----|--------------------------------|--------------------------------|--------------------------------|------|
| Day(s) Relative to Start Date |    | (10 <sup>3</sup> cells/<br>μL) | (10 <sup>3</sup> cells/<br>μL) | (10 <sup>3</sup> cells/<br>μL) | (%)  |
| 2001                          | 91 | 0.12                           | 0.06                           | 0.11                           | 12.2 |
| 2002                          | 91 | 0.18                           | 0.06                           | 0.07                           | 13.5 |
| 2003                          | 91 | 0.06                           | 0.03                           | 0.08                           | 12.7 |
| 2004                          | 91 | 0.15                           | 0.05                           | 0.23                           | 12.6 |
| 2005                          | 91 | 0.21                           | 0.03                           | 0.13                           | 12.7 |
| 2006                          | 8  | 0.05                           | 0.06                           | 0.09                           | 13.7 |
| 2007                          | 8  | 0.07                           | 0.06                           | 0.13                           | 13.2 |
| 2008                          | 8  | 0.04                           | 0.05                           | 0.13                           | 13.4 |
| 2009                          | 8  | 0.09                           | 0.05                           | 0.10                           | 13.2 |
| 2010                          | 8  | 0.07                           | 0.12                           | 0.22                           | 12.9 |
| 2011                          | 29 | 0.05                           | 0.04                           | 0.06                           | 12.0 |
| 2012                          | 29 | 0.06                           | 0.06                           | 0.17                           | 11.7 |
| 2013                          | 29 | 0.01                           | 0.03                           | 0.18                           | 12.7 |
| 2014                          | 29 | 0.04                           | 0.04                           | 0.10                           | 11.5 |
| 2015                          | 29 | 0.06                           | 0.03                           | 0.22                           | 11.5 |

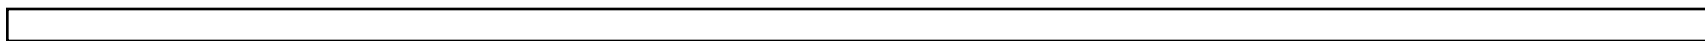

2759-001  
A Single Dose Toxicity Study of Test Article Administered by Intrathecal Injection in Rats

Individual Hematology Values

Sex: Male

| Mid Dose                      |    | Leukocytes                     | Erythrocytes                   | Hemoglobin | Hematocrit | MCV  | MCH  |
|-------------------------------|----|--------------------------------|--------------------------------|------------|------------|------|------|
| Day(s) Relative to Start Date |    | (10 <sup>3</sup> cells/<br>μL) | (10 <sup>6</sup> cells/<br>μL) | (g/dL)     | (%)        | (fL) | (pg) |
| 3001                          | 91 | 13.1                           | 9.90                           | 18.1       | 58.8       | 59.4 | 18.3 |
| 3002                          | 91 | 12.5                           | 9.57                           | 16.4       | 52.5       | 54.9 | 17.2 |
| 3003                          | 91 | 12.3                           | 9.66                           | 17.1       | 55.9       | 57.9 | 17.6 |
| 3004                          | 91 | 12.4                           | 9.24                           | 16.9       | 54.7       | 59.2 | 18.3 |
| 3005                          | 91 | 14.5                           | 10.05                          | 17.5       | 56.4       | 56.1 | 17.4 |
| 3006                          | 8  | 18.0                           | 7.65                           | 15.4       | 51.1       | 66.8 | 20.2 |
| 3007                          | 8  | 17.1                           | 7.46                           | 15.4       | 51.5       | 69.0 | 20.7 |
| 3008                          | 8  | 14.1                           | 8.48                           | 16.7       | 55.1       | 65.0 | 19.7 |
| 3009                          | 8  | 16.6                           | 7.97                           | 15.7       | 51.9       | 65.2 | 19.7 |
| 3010                          | 8  | 15.2                           | 7.94                           | 15.7       | 51.3       | 64.5 | 19.8 |
| 3011                          | 29 | 16.8                           | 9.60                           | 17.3       | 54.3       | 56.6 | 18.0 |
| 3012                          | 29 | 15.8                           | 9.32                           | 17.1       | 54.5       | 58.5 | 18.4 |
| 3013                          | 29 | 17.2                           | 8.61                           | 17.0       | 54.4       | 63.1 | 19.7 |
| 3014                          | 29 | 13.7                           | 7.86                           | 16.3       | 50.6       | 64.4 | 20.7 |
| 3015                          | 29 | 22.6                           | 8.94                           | 16.6       | 51.9       | 58.1 | 18.5 |

|  |
|--|
|  |
|--|

2759-001  
A Single Dose Toxicity Study of Test Article Administered by Intrathecal Injection in Rats

Individual Hematology Values

Sex: Male

| Mid Dose                      |    | MCHC   | Platelets                      | Absolute Reticulocyte          | Neutrophils                    | Lymphocytes                    | Monocytes                      |
|-------------------------------|----|--------|--------------------------------|--------------------------------|--------------------------------|--------------------------------|--------------------------------|
| Day(s) Relative to Start Date |    | (g/dL) | (10 <sup>3</sup> cells/<br>μL) | (10 <sup>3</sup> cells/<br>μL) | (10 <sup>3</sup> cells/<br>μL) | (10 <sup>3</sup> cells/<br>μL) | (10 <sup>3</sup> cells/<br>μL) |
| 3001                          | 91 | 30.7   | 1210                           | 203.5                          | 1.36                           | 11.30                          | 0.26                           |
| 3002                          | 91 | 31.3   | 1211                           | 160.3                          | 1.54                           | 9.97                           | 0.60                           |
| 3003                          | 91 | 30.5   | 1183                           | 173.3                          | 1.44                           | 10.09                          | 0.34                           |
| 3004                          | 91 | 30.8   | 1157                           | 209.8                          | 1.08                           | 10.77                          | 0.19                           |
| 3005                          | 91 | 31.0   | 1220                           | 221.0                          | 2.69                           | 10.83                          | 0.62                           |
| 3006                          | 8  | 30.2   | 1429                           | 394.8                          | 1.98                           | 15.26                          | 0.50                           |
| 3007                          | 8  | 30.0   | 1385                           | 424.9                          | 1.61                           | 14.86                          | 0.35                           |
| 3008                          | 8  | 30.3   | 1241                           | 557.0                          | 1.71                           | 11.61                          | 0.52                           |
| 3009                          | 8  | 30.2   | 1341                           | 372.8                          | 1.83                           | 14.12                          | 0.33                           |
| 3010                          | 8  | 30.7   | 1272                           | 464.9                          | 1.84                           | 12.94                          | 0.26                           |
| 3011                          | 29 | 31.8   | 1225                           | 192.6                          | 1.36                           | 14.89                          | 0.20                           |
| 3012                          | 29 | 31.4   | 1201                           | 302.5                          | 1.85                           | 13.17                          | 0.48                           |
| 3013                          | 29 | 31.2   | 1243                           | 281.1                          | 1.05                           | 15.62                          | 0.29                           |
| 3014                          | 29 | 32.2   | 966                            | 177.2                          | 0.97                           | 11.89                          | 0.30                           |
| 3015                          | 29 | 31.9   | 1082                           | 195.9                          | 3.20                           | 18.26                          | 0.42                           |

|  |
|--|
|  |
|--|



2759-001  
A Single Dose Toxicity Study of Test Article Administered by Intrathecal Injection in Rats

Individual Hematology Values

Sex: Male

| Mid Dose                      |    | Eosinophils                    | Basophils                      | Other Cells                    | RDW  |
|-------------------------------|----|--------------------------------|--------------------------------|--------------------------------|------|
| Day(s) Relative to Start Date |    | (10 <sup>3</sup> cells/<br>μL) | (10 <sup>3</sup> cells/<br>μL) | (10 <sup>3</sup> cells/<br>μL) | (%)  |
| 3001                          | 91 | 0.08                           | 0.04                           | 0.08                           | 12.4 |
| 3002                          | 91 | 0.12                           | 0.05                           | 0.18                           | 14.4 |
| 3003                          | 91 | 0.11                           | 0.04                           | 0.24                           | 14.3 |
| 3004                          | 91 | 0.12                           | 0.04                           | 0.16                           | 13.8 |
| 3005                          | 91 | 0.18                           | 0.09                           | 0.12                           | 13.3 |
| 3006                          | 8  | 0.08                           | 0.09                           | 0.10                           | 12.6 |
| 3007                          | 8  | 0.04                           | 0.06                           | 0.16                           | 13.1 |
| 3008                          | 8  | 0.08                           | 0.05                           | 0.17                           | 14.2 |
| 3009                          | 8  | 0.10                           | 0.09                           | 0.14                           | 14.1 |
| 3010                          | 8  | 0.04                           | 0.07                           | 0.09                           | 13.4 |
| 3011                          | 29 | 0.07                           | 0.05                           | 0.23                           | 11.5 |
| 3012                          | 29 | 0.07                           | 0.07                           | 0.18                           | 12.3 |
| 3013                          | 29 | 0.05                           | 0.07                           | 0.17                           | 12.5 |
| 3014                          | 29 | 0.15                           | 0.07                           | 0.28                           | 12.5 |
| 3015                          | 29 | 0.19                           | 0.13                           | 0.37                           | 12.4 |



2759-001  
A Single Dose Toxicity Study of Test Article Administered by Intrathecal Injection in Rats

Individual Hematology Values

Sex: Male

| High Dose                     |    | Leukocytes                     | Erythrocytes                   | Hemoglobin | Hematocrit | MCV  | MCH  |
|-------------------------------|----|--------------------------------|--------------------------------|------------|------------|------|------|
| Day(s) Relative to Start Date |    | (10 <sup>3</sup> cells/<br>μL) | (10 <sup>6</sup> cells/<br>μL) | (g/dL)     | (%)        | (fL) | (pg) |
| 4001                          | 91 | 15.8                           | 9.56                           | 16.9       | 53.8       | 56.3 | 17.7 |
| 4002                          | 91 | 11.8                           | 9.39                           | 17.1       | 53.8       | 57.3 | 18.2 |
| 4003                          | 91 | 15.2                           | 9.66                           | 17.7       | 56.5       | 58.5 | 18.3 |
| 4004                          | 91 | 13.3                           | 9.55                           | 17.9       | 57.1       | 59.8 | 18.8 |
| 4005                          | 91 | 12.8                           | 9.31                           | 16.3       | 51.9       | 55.7 | 17.5 |
| 4006                          | 8  | 18.3                           | 8.49                           | 16.7       | 54.4       | 64.1 | 19.7 |
| 4007                          | 8  | 16.0                           | 8.28                           | 16.8       | 54.2       | 65.5 | 20.3 |
| 4008                          | 8  | 11.7                           | 8.25                           | 17.2       | 55.9       | 67.8 | 20.8 |
| 4009                          | 8  | 13.3                           | 8.61                           | 17.1       | 56.2       | 65.3 | 19.9 |
| 4010                          | 8  | 16.1                           | 8.37                           | 17.4       | 55.7       | 66.6 | 20.8 |
| 4011                          | 29 | 12.7                           | 9.06                           | 17.3       | 55.1       | 60.8 | 19.1 |
| 4012                          | 29 | 17.0                           | 8.23                           | 16.6       | 52.5       | 63.8 | 20.1 |
| 4013                          | 29 | 19.8                           | 8.33                           | 16.0       | 50.3       | 60.4 | 19.2 |
| 4014                          | 29 | 22.9                           | 7.86                           | 16.0       | 48.6       | 61.8 | 20.4 |
| 4015                          | 29 | 20.5                           | 8.76                           | 17.2       | 53.1       | 60.6 | 19.6 |

|  |
|--|
|  |
|--|

2759-001  
A Single Dose Toxicity Study of Test Article Administered by Intrathecal Injection in Rats

Individual Hematology Values

Sex: Male

| High Dose                     |    | MCHC   | Platelets                      | Absolute Reticulocyte          | Neutrophils                    | Lymphocytes                    | Monocytes                      |
|-------------------------------|----|--------|--------------------------------|--------------------------------|--------------------------------|--------------------------------|--------------------------------|
| Day(s) Relative to Start Date |    | (g/dL) | (10 <sup>3</sup> cells/<br>μL) | (10 <sup>3</sup> cells/<br>μL) | (10 <sup>3</sup> cells/<br>μL) | (10 <sup>3</sup> cells/<br>μL) | (10 <sup>3</sup> cells/<br>μL) |
| 4001                          | 91 | 31.4   | 1031                           | 202.4                          | 3.20                           | 11.47                          | 0.52                           |
| 4002                          | 91 | 31.8   | 1049                           | 234.0                          | 1.66                           | 9.70                           | 0.14                           |
| 4003                          | 91 | 31.4   | 978                            | 210.9                          | 1.71                           | 12.71                          | 0.32                           |
| 4004                          | 91 | 31.4   | 1198                           | 262.1                          | 1.37                           | 11.12                          | 0.48                           |
| 4005                          | 91 | 31.4   | 1107                           | 213.9                          | 1.69                           | 10.27                          | 0.51                           |
| 4006                          | 8  | 30.7   | 1316                           | 338.6                          | 1.64                           | 15.69                          | 0.55                           |
| 4007                          | 8  | 31.0   | 1410                           | 424.1                          | 1.28                           | 14.20                          | 0.36                           |
| 4008                          | 8  | 30.7   | 1041                           | 416.8                          | 0.84                           | 10.35                          | 0.30                           |
| 4009                          | 8  | 30.5   | 1236                           | 518.2                          | 1.15                           | 11.52                          | 0.26                           |
| 4010                          | 8  | 31.3   | 1299                           | 464.9                          | 1.71                           | 13.59                          | 0.53                           |
| 4011                          | 29 | 31.4   | 928                            | 228.7                          | 0.87                           | 11.07                          | 0.39                           |
| 4012                          | 29 | 31.6   | 988                            | 263.1                          | 0.90                           | 15.33                          | 0.21                           |
| 4013                          | 29 | 31.7   | 1121                           | 218.0                          | 2.30                           | 16.66                          | 0.42                           |
| 4014                          | 29 | 33.0   | 1126                           | 208.5                          | 1.42                           | 20.54                          | 0.41                           |
| 4015                          | 29 | 32.4   | 986                            | 218.7                          | 1.52                           | 18.28                          | 0.32                           |

|  |
|--|
|  |
|--|

2759-001  
A Single Dose Toxicity Study of Test Article Administered by Intrathecal Injection in Rats

Individual Hematology Values

Sex: Male

| High Dose                     |    | Eosinophils                    | Basophils                      | Other Cells                    | RDW  |
|-------------------------------|----|--------------------------------|--------------------------------|--------------------------------|------|
| Day(s) Relative to Start Date |    | (10 <sup>3</sup> cells/<br>μL) | (10 <sup>3</sup> cells/<br>μL) | (10 <sup>3</sup> cells/<br>μL) | (%)  |
| 4001                          | 91 | 0.18                           | 0.08                           | 0.30                           | 13.8 |
| 4002                          | 91 | 0.10                           | 0.06                           | 0.16                           | 12.8 |
| 4003                          | 91 | 0.16                           | 0.07                           | 0.25                           | 11.7 |
| 4004                          | 91 | 0.09                           | 0.06                           | 0.15                           | 12.8 |
| 4005                          | 91 | 0.08                           | 0.06                           | 0.19                           | 12.9 |
| 4006                          | 8  | 0.10                           | 0.09                           | 0.18                           | 12.2 |
| 4007                          | 8  | 0.05                           | 0.06                           | 0.08                           | 12.4 |
| 4008                          | 8  | 0.08                           | 0.04                           | 0.08                           | 12.3 |
| 4009                          | 8  | 0.07                           | 0.10                           | 0.16                           | 13.5 |
| 4010                          | 8  | 0.03                           | 0.08                           | 0.15                           | 12.9 |
| 4011                          | 29 | 0.04                           | 0.06                           | 0.31                           | 12.1 |
| 4012                          | 29 | 0.05                           | 0.09                           | 0.46                           | 12.1 |
| 4013                          | 29 | 0.09                           | 0.10                           | 0.20                           | 12.1 |
| 4014                          | 29 | 0.12                           | 0.13                           | 0.31                           | 11.9 |
| 4015                          | 29 | 0.08                           | 0.07                           | 0.23                           | 11.6 |

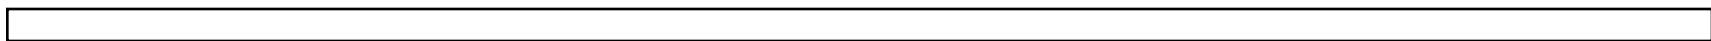

2759-001  
A Single Dose Toxicity Study of Test Article Administered by Intrathecal Injection in Rats

Individual Blood Cell Morphology

Sex: Male

| Low Dose                      |    |                       |               |               |              |                      |                     |
|-------------------------------|----|-----------------------|---------------|---------------|--------------|----------------------|---------------------|
| Day(s) Relative to Start Date |    | Blood Cell Morphology | Nucleated RBC | Polychromasia | Heinz Bodies | Basophilic Stippling | Pappenheimer Bodies |
| 2001                          | 91 | Findings              | 0             | 0             | 0            | 0                    | 0                   |
| 2002                          | 91 | Findings              | 0             | 0             | 0            | 0                    | 0                   |
| 2005                          | 91 | No Finding            | 0             | 0             | 0            | 0                    | 0                   |



2759-001  
A Single Dose Toxicity Study of Test Article Administered by Intrathecal Injection in Rats

Individual Blood Cell Morphology

Sex: Male

| Low Dose                      |    |                     |                         |            |             |             |                          |
|-------------------------------|----|---------------------|-------------------------|------------|-------------|-------------|--------------------------|
| Day(s) Relative to Start Date |    | Howell-Jolly Bodies | Echinocyte (Burr Cells) | Spherocyte | Schistocyte | Acanthocyte | Keratocyte, Blister Cell |
| 2001                          | 91 | 0                   | 0                       | 0          | 0           | 3+          | 0                        |
| 2002                          | 91 | 0                   | 0                       | 0          | 0           | 3+          | 0                        |
| 2005                          | 91 | 0                   | 0                       | 0          | 0           | 0           | 0                        |

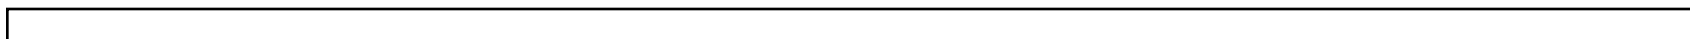

2759-001  
 A Single Dose Toxicity Study of Test Article Administered by Intrathecal Injection in Rats

Individual Blood Cell Morphology

Sex: Male

| Low Dose                      |    | Eccentrocyte | Unclassified Poik | Ghost Cells | Rouleaux | RBC Agglutination | NCC |
|-------------------------------|----|--------------|-------------------|-------------|----------|-------------------|-----|
| Day(s) Relative to Start Date |    |              |                   |             |          |                   |     |
| 2001                          | 91 | 0            | 0                 | 0           | 0        | 0                 | 0   |
| 2002                          | 91 | 0            | 0                 | 0           | 0        | 0                 | 0   |
| 2005                          | 91 | 0            | 0                 | 0           | 0        | 0                 | 0   |



2759-001  
 A Single Dose Toxicity Study of Test Article Administered by Intrathecal Injection in Rats

Individual Blood Cell Morphology

Sex: Male

| Low Dose                      |    |              |                |                     |                    |                         |                         |
|-------------------------------|----|--------------|----------------|---------------------|--------------------|-------------------------|-------------------------|
| Day(s) Relative to Start Date |    | Smudge Cells | Pyknotic Cells | Reactive Lymphocyte | Reactive Monocytes | Leukocyte Agglutination | Platelet Estimate Count |
| 2001                          | 91 | 0            | 0              | 0                   | 0                  | 0                       | CAC                     |
| 2002                          | 91 | 0            | 0              | 0                   | 0                  | 0                       | CAC                     |
| 2005                          | 91 | 0            | 0              | 0                   | 0                  | 0                       | CAC                     |





2759-001  
 A Single Dose Toxicity Study of Test Article Administered by Intrathecal Injection in Rats

Individual Blood Cell Morphology

Sex: Male

| Low Dose                      |    |                 |                 |
|-------------------------------|----|-----------------|-----------------|
| Day(s) Relative to Start Date |    | Platelet Clumps | Large Platelets |
| 2001                          | 91 | Present         | 0               |
| 2002                          | 91 | 0               | 0               |
| 2005                          | 91 | 0               | 0               |



2759-001  
A Single Dose Toxicity Study of Test Article Administered by Intrathecal Injection in Rats

Individual Blood Cell Morphology

Sex: Male

| Mid Dose                      |    | Blood Cell Morphology | Nucleated RBC | Polychromasia | Heinz Bodies | Basophilic Stippling | Pappenheimer Bodies |
|-------------------------------|----|-----------------------|---------------|---------------|--------------|----------------------|---------------------|
| Day(s) Relative to Start Date |    |                       |               |               |              |                      |                     |
| 3005                          | 91 | Findings              | 0             | 1+            | 0            | 0                    | 0                   |

|  |
|--|
|  |
|--|

2759-001  
A Single Dose Toxicity Study of Test Article Administered by Intrathecal Injection in Rats

Individual Blood Cell Morphology

Sex: Male

| Mid Dose                      |    | Howell-Jolly Bodies | Echinocyte (Burr Cells) | Spherocyte | Schistocyte | Acanthocyte | Keratocyte, Blister Cell |
|-------------------------------|----|---------------------|-------------------------|------------|-------------|-------------|--------------------------|
| Day(s) Relative to Start Date |    |                     |                         |            |             |             |                          |
| 3005                          | 91 | 0                   | 0                       | 0          | 0           | 3+          | 0                        |



2759-001  
 A Single Dose Toxicity Study of Test Article Administered by Intrathecal Injection in Rats

Individual Blood Cell Morphology

Sex: Male

| Mid Dose                      |    | Eccentrocyte | Unclassified Poik | Ghost Cells | Rouleaux | RBC Agglutination | NCC |
|-------------------------------|----|--------------|-------------------|-------------|----------|-------------------|-----|
| Day(s) Relative to Start Date |    |              |                   |             |          |                   |     |
| 3005                          | 91 | 0            | 0                 | 0           | 0        | 0                 | 0   |



2759-001  
 A Single Dose Toxicity Study of Test Article Administered by Intrathecal Injection in Rats

Individual Blood Cell Morphology

Sex: Male

| Mid Dose                      |    |              |                |                     |                    |                         |                         |
|-------------------------------|----|--------------|----------------|---------------------|--------------------|-------------------------|-------------------------|
| Day(s) Relative to Start Date |    | Smudge Cells | Pyknotic Cells | Reactive Lymphocyte | Reactive Monocytes | Leukocyte Agglutination | Platelet Estimate Count |
| 3005                          | 91 | 0            | 0              | 0                   | 0                  | 0                       | CAC                     |



2759-001  
 A Single Dose Toxicity Study of Test Article Administered by Intrathecal Injection in Rats

Individual Blood Cell Morphology

Sex: Male

| Mid Dose                      |    |                 |                 |
|-------------------------------|----|-----------------|-----------------|
| Day(s) Relative to Start Date |    | Platelet Clumps | Large Platelets |
| 3005                          | 91 | Present         | 0               |



2759-001  
A Single Dose Toxicity Study of Test Article Administered by Intrathecal Injection in Rats

Individual Hematology Values

Sex: Female

| Vehicle                       |    | Leukocytes                     | Erythrocytes                   | Hemoglobin | Hematocrit | MCV  | MCH  |
|-------------------------------|----|--------------------------------|--------------------------------|------------|------------|------|------|
| Day(s) Relative to Start Date |    | (10 <sup>3</sup> cells/<br>μL) | (10 <sup>6</sup> cells/<br>μL) | (g/dL)     | (%)        | (fL) | (pg) |
| 1501                          | 91 | 6.0                            | 8.95                           | 17.4       | 56.2       | 62.8 | 19.5 |
| 1502                          | 91 | 6.2                            | 9.95                           | 16.9       | 55.2       | 55.5 | 17.0 |
| 1503                          | 91 | 9.8                            | 9.45                           | 17.5       | 54.6       | 57.8 | 18.5 |
| 1504                          | 91 | 11.6                           | 8.93                           | 16.3       | 51.1       | 57.2 | 18.3 |
| 1505                          | 91 | 8.4                            | 8.22                           | 16.5       | 50.7       | 61.7 | 20.0 |
| 1506                          | 8  | 12.3                           | 7.81                           | 16.0       | 53.0       | 67.9 | 20.4 |
| 1507                          | 8  | 9.9                            | 8.31                           | 16.6       | 54.3       | 65.3 | 20.0 |
| 1508                          | 8  | 8.4                            | 8.20                           | 16.6       | 54.2       | 66.1 | 20.2 |
| 1509                          | 8  | 8.8                            | 7.82                           | 15.9       | 50.1       | 64.0 | 20.3 |
| 1510                          | 8  | 12.5                           | 8.26                           | 15.8       | 49.8       | 60.3 | 19.1 |
| 1511                          | 29 | 8.1                            | 9.48                           | 18.2       | 57.3       | 60.4 | 19.2 |
| 1512                          | 29 | 9.4                            | 8.84                           | 17.6       | 56.3       | 63.7 | 20.0 |
| 1513                          | 29 | 5.8                            | 8.18                           | 15.9       | 48.9       | 59.8 | 19.4 |
| 1514                          | 29 | 15.4                           | 9.41                           | 18.4       | 56.0       | 59.5 | 19.6 |
| 1515                          | 29 | 14.1                           | 9.21                           | 17.1       | 52.6       | 57.1 | 18.6 |

|  |
|--|
|  |
|--|

2759-001  
A Single Dose Toxicity Study of Test Article Administered by Intrathecal Injection in Rats

Individual Hematology Values

Sex: Female

| Vehicle                       |    | MCHC   | Platelets                      | Absolute Reticulocyte          | Neutrophils                    | Lymphocytes                    | Monocytes                      |
|-------------------------------|----|--------|--------------------------------|--------------------------------|--------------------------------|--------------------------------|--------------------------------|
| Day(s) Relative to Start Date |    | (g/dL) | (10 <sup>3</sup> cells/<br>μL) | (10 <sup>3</sup> cells/<br>μL) | (10 <sup>3</sup> cells/<br>μL) | (10 <sup>3</sup> cells/<br>μL) | (10 <sup>3</sup> cells/<br>μL) |
| 1501                          | 91 | 31.0   | 968                            | 249.9                          | 0.56                           | 5.22                           | 0.12                           |
| 1502                          | 91 | 30.7   | 1143                           | 141.2                          | 0.57                           | 5.30                           | 0.15                           |
| 1503                          | 91 | 32.0   | 694                            | 160.1                          | 0.95                           | 8.44                           | 0.20                           |
| 1504                          | 91 | 32.0   | 822                            | 125.8                          | 1.47                           | 9.38                           | 0.35                           |
| 1505                          | 91 | 32.5   | 1172                           | 178.4                          | 0.86                           | 7.17                           | 0.22                           |
| 1506                          | 8  | 30.1   | 1234                           | 309.1                          | 1.16                           | 10.65                          | 0.23                           |
| 1507                          | 8  | 30.6   | 1043                           | 255.6                          | 0.85                           | 8.70                           | 0.12                           |
| 1508                          | 8  | 30.5   | 1258                           | 324.9                          | 0.65                           | 7.39                           | 0.20                           |
| 1509                          | 8  | 31.7   | 1353                           | 278.1                          | 0.60                           | 7.58                           | 0.29                           |
| 1510                          | 8  | 31.8   | 1445                           | 215.2                          | 0.95                           | 11.03                          | 0.29                           |
| 1511                          | 29 | 31.7   | 1011                           | 184.5                          | 0.87                           | 6.95                           | 0.14                           |
| 1512                          | 29 | 31.3   | 857                            | 211.8                          | 0.53                           | 8.51                           | 0.19                           |
| 1513                          | 29 | 32.5   | 1058                           | 249.5                          | 0.99                           | 4.58                           | 0.10                           |
| 1514                          | 29 | 32.9   | 999                            | 189.1                          | 2.03                           | 12.46                          | 0.49                           |
| 1515                          | 29 | 32.5   | 980                            | 240.2                          | 1.25                           | 12.19                          | 0.31                           |

|  |
|--|
|  |
|--|



2759-001  
A Single Dose Toxicity Study of Test Article Administered by Intrathecal Injection in Rats

Individual Hematology Values

Sex: Female

| Vehicle                       |    | Eosinophils                    | Basophils                      | Other Cells                    | RDW  |
|-------------------------------|----|--------------------------------|--------------------------------|--------------------------------|------|
| Day(s) Relative to Start Date |    | (10 <sup>3</sup> cells/<br>μL) | (10 <sup>3</sup> cells/<br>μL) | (10 <sup>3</sup> cells/<br>μL) | (%)  |
| 1501                          | 91 | 0.06                           | 0.02                           | 0.06                           | 11.3 |
| 1502                          | 91 | 0.04                           | 0.04                           | 0.06                           | 11.5 |
| 1503                          | 91 | 0.07                           | 0.03                           | 0.07                           | 12.0 |
| 1504                          | 91 | 0.10                           | 0.04                           | 0.21                           | 11.6 |
| 1505                          | 91 | 0.09                           | 0.02                           | 0.08                           | 12.2 |
| 1506                          | 8  | 0.11                           | 0.04                           | 0.11                           | 12.3 |
| 1507                          | 8  | 0.04                           | 0.06                           | 0.09                           | 11.9 |
| 1508                          | 8  | 0.09                           | 0.02                           | 0.06                           | 11.2 |
| 1509                          | 8  | 0.08                           | 0.05                           | 0.20                           | 11.5 |
| 1510                          | 8  | 0.06                           | 0.06                           | 0.17                           | 11.8 |
| 1511                          | 29 | 0.06                           | 0.04                           | 0.06                           | 10.9 |
| 1512                          | 29 | 0.03                           | 0.07                           | 0.08                           | 12.3 |
| 1513                          | 29 | 0.04                           | 0.03                           | 0.04                           | 11.6 |
| 1514                          | 29 | 0.07                           | 0.07                           | 0.27                           | 11.7 |
| 1515                          | 29 | 0.05                           | 0.05                           | 0.23                           | 11.1 |



2759-001  
A Single Dose Toxicity Study of Test Article Administered by Intrathecal Injection in Rats

Individual Hematology Values

Sex: Female

| Low Dose                      |    | Leukocytes                     | Erythrocytes                   | Hemoglobin | Hematocrit | MCV  | MCH  |
|-------------------------------|----|--------------------------------|--------------------------------|------------|------------|------|------|
| Day(s) Relative to Start Date |    | (10 <sup>3</sup> cells/<br>μL) | (10 <sup>6</sup> cells/<br>μL) | (g/dL)     | (%)        | (fL) | (pg) |
| 2501                          | 91 | 8.5                            | 8.35                           | 15.5       | 50.1       | 60.1 | 18.6 |
| 2502                          | 91 | 8.6                            | 8.65                           | 17.0       | 53.2       | 61.5 | 19.6 |
| 2503                          | 91 | 8.7                            | 9.01                           | 17.7       | 53.5       | 59.4 | 19.6 |
| 2504                          | 91 | 7.8                            | 8.19                           | 16.0       | 51.4       | 62.8 | 19.5 |
| 2505                          | 91 | 8.8                            | 8.21                           | 15.4       | 49.8       | 60.7 | 18.8 |
| 2506                          | 8  | 11.1                           | 7.13                           | 14.9       | 47.8       | 67.0 | 20.9 |
| 2507                          | 8  | 10.9                           | 7.67                           | 15.2       | 49.6       | 64.7 | 19.8 |
| 2508                          | 8  | 7.3                            | 8.46                           | 16.5       | 54.5       | 64.5 | 19.5 |
| 2509                          | 8  | 10.5                           | 7.81                           | 16.0       | 51.6       | 66.1 | 20.5 |
| 2510                          | 8  | 11.8                           | 8.11                           | 16.5       | 53.6       | 66.2 | 20.3 |
| 2511                          | 29 | 12.8                           | 9.74                           | 17.7       | 56.8       | 58.3 | 18.2 |
| 2512                          | 29 | 12.6                           | 8.16                           | 16.3       | 50.2       | 61.5 | 20.0 |
| 2513                          | 29 | 12.1                           | 8.86                           | 17.0       | 53.9       | 60.8 | 19.2 |
| 2514                          | 29 | 12.7                           | 8.09                           | 15.2       | 46.0       | 56.9 | 18.8 |
| 2515                          | 29 | 8.7                            | 8.66                           | 17.1       | 51.9       | 59.9 | 19.7 |

|  |
|--|
|  |
|--|

2759-001  
A Single Dose Toxicity Study of Test Article Administered by Intrathecal Injection in Rats

Individual Hematology Values

Sex: Female

| Low Dose                      |    | MCHC   | Platelets                      | Absolute Reticulocyte          | Neutrophils                    | Lymphocytes                    | Monocytes                      |
|-------------------------------|----|--------|--------------------------------|--------------------------------|--------------------------------|--------------------------------|--------------------------------|
| Day(s) Relative to Start Date |    | (g/dL) | (10 <sup>3</sup> cells/<br>μL) | (10 <sup>3</sup> cells/<br>μL) | (10 <sup>3</sup> cells/<br>μL) | (10 <sup>3</sup> cells/<br>μL) | (10 <sup>3</sup> cells/<br>μL) |
| 2501                          | 91 | 30.9   | 1023                           | 209.6                          | 0.71                           | 7.34                           | 0.29                           |
| 2502                          | 91 | 31.9   | 725                            | 198.1                          | 0.39                           | 7.65                           | 0.34                           |
| 2503                          | 91 | 33.0   | 891                            | 167.9                          | 0.47                           | 7.96                           | 0.11                           |
| 2504                          | 91 | 31.1   | 997                            | 224.7                          | 0.74                           | 6.64                           | 0.27                           |
| 2505                          | 91 | 31.0   | 1150                           | 159.9                          | 1.81                           | 6.71                           | 0.12                           |
| 2506                          | 8  | 31.2   | 1250                           | 338.6                          | 0.56                           | 9.74                           | 0.56                           |
| 2507                          | 8  | 30.6   | 1103                           | 221.6                          | 0.58                           | 9.91                           | 0.25                           |
| 2508                          | 8  | 30.3   | 888                            | 231.8                          | 0.55                           | 6.57                           | 0.11                           |
| 2509                          | 8  | 31.1   | 1134                           | 246.2                          | 0.76                           | 9.36                           | 0.21                           |
| 2510                          | 8  | 30.7   | 1259                           | 320.6                          | 1.05                           | 10.15                          | 0.35                           |
| 2511                          | 29 | 31.2   | 386                            | 175.7                          | 1.16                           | 10.95                          | 0.23                           |
| 2512                          | 29 | 32.5   | 950                            | 235.7                          | 0.74                           | 11.45                          | 0.18                           |
| 2513                          | 29 | 31.5   | 1325                           | 212.0                          | 0.79                           | 10.80                          | 0.17                           |
| 2514                          | 29 | 33.1   | 980                            | 202.0                          | 1.06                           | 11.28                          | 0.13                           |
| 2515                          | 29 | 32.9   | 988                            | 263.6                          | 0.68                           | 7.58                           | 0.23                           |

|  |
|--|
|  |
|--|

2759-001  
A Single Dose Toxicity Study of Test Article Administered by Intrathecal Injection in Rats

Individual Hematology Values

Sex: Female

| Low Dose                      |    | Eosinophils                    | Basophils                      | Other Cells                    | RDW  |
|-------------------------------|----|--------------------------------|--------------------------------|--------------------------------|------|
| Day(s) Relative to Start Date |    | (10 <sup>3</sup> cells/<br>μL) | (10 <sup>3</sup> cells/<br>μL) | (10 <sup>3</sup> cells/<br>μL) | (%)  |
| 2501                          | 91 | 0.05                           | 0.02                           | 0.11                           | 11.2 |
| 2502                          | 91 | 0.04                           | 0.03                           | 0.14                           | 11.0 |
| 2503                          | 91 | 0.05                           | 0.04                           | 0.09                           | 11.7 |
| 2504                          | 91 | 0.05                           | 0.03                           | 0.10                           | 11.8 |
| 2505                          | 91 | 0.06                           | 0.03                           | 0.09                           | 11.8 |
| 2506                          | 8  | 0.06                           | 0.03                           | 0.14                           | 11.4 |
| 2507                          | 8  | 0.05                           | 0.04                           | 0.10                           | 11.8 |
| 2508                          | 8  | 0.04                           | 0.02                           | 0.04                           | 11.5 |
| 2509                          | 8  | 0.05                           | 0.04                           | 0.09                           | 11.9 |
| 2510                          | 8  | 0.12                           | 0.04                           | 0.13                           | 11.4 |
| 2511                          | 29 | 0.30                           | 0.05                           | 0.08                           | 12.7 |
| 2512                          | 29 | 0.05                           | 0.06                           | 0.11                           | 11.8 |
| 2513                          | 29 | 0.09                           | 0.03                           | 0.25                           | 11.6 |
| 2514                          | 29 | 0.05                           | 0.07                           | 0.13                           | 11.6 |
| 2515                          | 29 | 0.04                           | 0.03                           | 0.10                           | 11.5 |



2759-001  
A Single Dose Toxicity Study of Test Article Administered by Intrathecal Injection in Rats

Individual Hematology Values

Sex: Female

| Mid Dose                      |    | Leukocytes                     | Erythrocytes                   | Hemoglobin | Hematocrit | MCV  | MCH  |
|-------------------------------|----|--------------------------------|--------------------------------|------------|------------|------|------|
| Day(s) Relative to Start Date |    | (10 <sup>3</sup> cells/<br>μL) | (10 <sup>6</sup> cells/<br>μL) | (g/dL)     | (%)        | (fL) | (pg) |
| 3501                          | 91 | 12.3                           | 9.68                           | 18.9       | 60.3       | 62.3 | 19.5 |
| 3502                          | 91 | 10.0                           | 8.60                           | 16.2       | 51.6       | 60.0 | 18.9 |
| 3503                          | 91 | 12.2                           | 8.32                           | 17.1       | 53.5       | 64.3 | 20.5 |
| 3504                          | 91 | 9.5                            | 7.62                           | 14.2       | 44.8       | 58.8 | 18.7 |
| 3505                          | 91 | 8.5                            | 9.25                           | 16.6       | 53.0       | 57.3 | 17.9 |
| 3506                          | 8  | 12.1                           | 7.66                           | 15.3       | 49.8       | 65.0 | 20.0 |
| 3507                          | 8  | 14.2                           | 7.89                           | 16.1       | 50.7       | 64.2 | 20.4 |
| 3508                          | 8  | 9.1                            | 8.58                           | 16.0       | 50.9       | 59.3 | 18.6 |
| 3509                          | 8  | 12.4                           | 8.38                           | 16.3       | 52.2       | 62.3 | 19.5 |
| 3510                          | 8  | 13.5                           | 8.50                           | 16.7       | 51.8       | 60.9 | 19.7 |
| 3511                          | 29 | 20.2                           | 8.51                           | 16.7       | 51.8       | 60.8 | 19.7 |
| 3512                          | 29 | 10.4                           | 9.37                           | 17.2       | 53.0       | 56.6 | 18.4 |
| 3513                          | 29 | 11.7                           | 7.98                           | 15.4       | 46.6       | 58.3 | 19.2 |
| 3514                          | 29 | 11.0                           | 9.04                           | 16.3       | 50.7       | 56.1 | 18.1 |
| 3515                          | 29 | 13.1                           | 9.16                           | 17.0       | 53.1       | 57.9 | 18.6 |

|  |
|--|
|  |
|--|

2759-001  
A Single Dose Toxicity Study of Test Article Administered by Intrathecal Injection in Rats

Individual Hematology Values

Sex: Female

| Mid Dose                      |    | MCHC   | Platelets                      | Absolute Reticulocyte          | Neutrophils                    | Lymphocytes                    | Monocytes                      |
|-------------------------------|----|--------|--------------------------------|--------------------------------|--------------------------------|--------------------------------|--------------------------------|
| Day(s) Relative to Start Date |    | (g/dL) | (10 <sup>3</sup> cells/<br>μL) | (10 <sup>3</sup> cells/<br>μL) | (10 <sup>3</sup> cells/<br>μL) | (10 <sup>3</sup> cells/<br>μL) | (10 <sup>3</sup> cells/<br>μL) |
| 3501                          | 91 | 31.3   | 755                            | 165.3                          | 1.15                           | 10.66                          | 0.22                           |
| 3502                          | 91 | 31.4   | 977                            | 205.2                          | 1.41                           | 8.14                           | 0.26                           |
| 3503                          | 91 | 31.9   | 900                            | 281.4                          | 0.58                           | 11.25                          | 0.11                           |
| 3504                          | 91 | 31.8   | 799                            | 192.9                          | 0.64                           | 8.51                           | 0.13                           |
| 3505                          | 91 | 31.3   | 1239                           | 262.7                          | 0.51                           | 7.72                           | 0.09                           |
| 3506                          | 8  | 30.8   | 1403                           | 249.9                          | 1.00                           | 10.48                          | 0.41                           |
| 3507                          | 8  | 31.8   | 1409                           | 290.6                          | 1.33                           | 12.25                          | 0.33                           |
| 3508                          | 8  | 31.4   | 1106                           | 206.4                          | 0.65                           | 7.99                           | 0.18                           |
| 3509                          | 8  | 31.3   | 1211                           | 263.0                          | 0.87                           | 11.03                          | 0.29                           |
| 3510                          | 8  | 32.3   | 1324                           | 268.1                          | 0.97                           | 11.96                          | 0.22                           |
| 3511                          | 29 | 32.3   | 944                            | 268.5                          | 0.78                           | 18.72                          | 0.24                           |
| 3512                          | 29 | 32.4   | 1002                           | 233.5                          | 0.49                           | 9.40                           | 0.18                           |
| 3513                          | 29 | 33.0   | 1116                           | 160.6                          | 0.82                           | 10.31                          | 0.24                           |
| 3514                          | 29 | 32.2   | 974                            | 229.4                          | 1.03                           | 9.56                           | 0.23                           |
| 3515                          | 29 | 32.1   | 1175                           | 227.4                          | 1.36                           | 11.29                          | 0.18                           |

|  |
|--|
|  |
|--|

2759-001  
A Single Dose Toxicity Study of Test Article Administered by Intrathecal Injection in Rats

Individual Hematology Values

Sex: Female

| Mid Dose                      |    | Eosinophils                    | Basophils                      | Other Cells                    | RDW  |
|-------------------------------|----|--------------------------------|--------------------------------|--------------------------------|------|
| Day(s) Relative to Start Date |    | (10 <sup>3</sup> cells/<br>μL) | (10 <sup>3</sup> cells/<br>μL) | (10 <sup>3</sup> cells/<br>μL) | (%)  |
| 3501                          | 91 | 0.08                           | 0.07                           | 0.08                           | 12.4 |
| 3502                          | 91 | 0.05                           | 0.03                           | 0.07                           | 11.8 |
| 3503                          | 91 | 0.03                           | 0.06                           | 0.12                           | 11.9 |
| 3504                          | 91 | 0.08                           | 0.03                           | 0.14                           | 11.9 |
| 3505                          | 91 | 0.05                           | 0.02                           | 0.06                           | 12.4 |
| 3506                          | 8  | 0.04                           | 0.04                           | 0.12                           | 12.2 |
| 3507                          | 8  | 0.10                           | 0.05                           | 0.11                           | 12.3 |
| 3508                          | 8  | 0.05                           | 0.06                           | 0.13                           | 11.3 |
| 3509                          | 8  | 0.06                           | 0.04                           | 0.12                           | 12.0 |
| 3510                          | 8  | 0.14                           | 0.06                           | 0.14                           | 12.2 |
| 3511                          | 29 | 0.03                           | 0.13                           | 0.28                           | 13.0 |
| 3512                          | 29 | 0.08                           | 0.04                           | 0.19                           | 12.3 |
| 3513                          | 29 | 0.02                           | 0.04                           | 0.22                           | 11.5 |
| 3514                          | 29 | 0.05                           | 0.04                           | 0.09                           | 12.2 |
| 3515                          | 29 | 0.05                           | 0.04                           | 0.13                           | 11.4 |



2759-001  
A Single Dose Toxicity Study of Test Article Administered by Intrathecal Injection in Rats

Individual Hematology Values

Sex: Female

| High Dose                     |    | Leukocytes                     | Erythrocytes                   | Hemoglobin | Hematocrit | MCV  | MCH  |
|-------------------------------|----|--------------------------------|--------------------------------|------------|------------|------|------|
| Day(s) Relative to Start Date |    | (10 <sup>3</sup> cells/<br>μL) | (10 <sup>6</sup> cells/<br>μL) | (g/dL)     | (%)        | (fL) | (pg) |
| 4501                          | 91 | 8.6                            | 9.10                           | 17.1       | 55.0       | 60.5 | 18.7 |
| 4502                          | 91 | 17.2                           | 9.54                           | 17.7       | 57.1       | 59.8 | 18.6 |
| 4503                          | 91 | 10.0                           | 8.03                           | 15.0       | 45.9       | 57.2 | 18.7 |
| 4504                          | 91 | 18.3                           | 8.52                           | 16.2       | 49.0       | 57.5 | 19.0 |
| 4505                          | 91 | 12.9                           | 8.65                           | 16.9       | 51.5       | 59.5 | 19.5 |
| 4506                          | 8  | 19.0                           | 8.42                           | 17.5       | 55.7       | 66.1 | 20.8 |
| 4507                          | 8  | 9.0                            | 8.74                           | 17.0       | 51.7       | 59.1 | 19.5 |
| 4508                          | 8  | 7.9                            | 7.92                           | 15.5       | 50.8       | 64.2 | 19.6 |
| 4509                          | 8  | 12.6                           | 8.22                           | 16.1       | 50.0       | 60.8 | 19.6 |
| 4510                          | 8  | 11.1                           | 9.14                           | 18.3       | 56.4       | 61.7 | 20.0 |
| 4511                          | 29 | 11.6                           | 8.77                           | 16.6       | 51.7       | 59.0 | 18.9 |
| 4512                          | 29 | 11.8                           | 8.74                           | 17.0       | 50.7       | 58.0 | 19.4 |
| 4513                          | 29 | 10.2                           | 8.75                           | 16.4       | 50.4       | 57.5 | 18.8 |
| 4514                          | 29 | 15.5                           | 8.85                           | 16.4       | 51.2       | 57.8 | 18.5 |
| 4515                          | 29 | 11.8                           | 8.65                           | 16.3       | 49.8       | 57.6 | 18.8 |

|  |
|--|
|  |
|--|



2759-001  
A Single Dose Toxicity Study of Test Article Administered by Intrathecal Injection in Rats

Individual Hematology Values

Sex: Female

| High Dose                     |    | MCHC   | Platelets                      | Absolute Reticulocyte          | Neutrophils                    | Lymphocytes                    | Monocytes                      |
|-------------------------------|----|--------|--------------------------------|--------------------------------|--------------------------------|--------------------------------|--------------------------------|
| Day(s) Relative to Start Date |    | (g/dL) | (10 <sup>3</sup> cells/<br>μL) | (10 <sup>3</sup> cells/<br>μL) | (10 <sup>3</sup> cells/<br>μL) | (10 <sup>3</sup> cells/<br>μL) | (10 <sup>3</sup> cells/<br>μL) |
| 4501                          | 91 | 31.0   | 706                            | 169.4                          | 1.14                           | 7.07                           | 0.27                           |
| 4502                          | 91 | 31.1   | 797                            | 198.1                          | 1.37                           | 15.06                          | 0.49                           |
| 4503                          | 91 | 32.7   | 968                            | 166.2                          | 0.72                           | 8.94                           | 0.15                           |
| 4504                          | 91 | 33.0   | 756                            | 189.6                          | 1.05                           | 16.41                          | 0.40                           |
| 4505                          | 91 | 32.8   | 1043                           | 166.0                          | 0.53                           | 11.89                          | 0.25                           |
| 4506                          | 8  | 31.5   | 1166                           | 305.5                          | 1.04                           | 16.88                          | 0.67                           |
| 4507                          | 8  | 32.9   | 983                            | 178.4                          | 0.44                           | 8.03                           | 0.30                           |
| 4508                          | 8  | 30.5   | 1266                           | 260.2                          | 0.87                           | 6.66                           | 0.18                           |
| 4509                          | 8  | 32.2   | 1160                           | 230.2                          | 0.98                           | 11.19                          | 0.22                           |
| 4510                          | 8  | 32.4   | 1128                           | 169.1                          | 0.70                           | 10.03                          | 0.14                           |
| 4511                          | 29 | 32.1   | 1040                           | 145.1                          | 0.72                           | 10.16                          | 0.45                           |
| 4512                          | 29 | 33.5   | 926                            | 209.1                          | 0.83                           | 10.38                          | 0.33                           |
| 4513                          | 29 | 32.6   | 986                            | 198.5                          | 0.37                           | 9.32                           | 0.30                           |
| 4514                          | 29 | 32.0   | 1193                           | 233.3                          | 0.93                           | 13.61                          | 0.50                           |
| 4515                          | 29 | 32.6   | 1007                           | 234.6                          | 1.09                           | 10.13                          | 0.41                           |



2759-001  
A Single Dose Toxicity Study of Test Article Administered by Intrathecal Injection in Rats

Individual Hematology Values

Sex: Female

| High Dose                     |    | Eosinophils                    | Basophils                      | Other Cells                    | RDW  |
|-------------------------------|----|--------------------------------|--------------------------------|--------------------------------|------|
| Day(s) Relative to Start Date |    | (10 <sup>3</sup> cells/<br>μL) | (10 <sup>3</sup> cells/<br>μL) | (10 <sup>3</sup> cells/<br>μL) | (%)  |
| 4501                          | 91 | 0.07                           | 0.02                           | 0.05                           | 12.5 |
| 4502                          | 91 | 0.03                           | 0.08                           | 0.12                           | 12.7 |
| 4503                          | 91 | 0.08                           | 0.04                           | 0.09                           | 11.7 |
| 4504                          | 91 | 0.09                           | 0.09                           | 0.23                           | 12.2 |
| 4505                          | 91 | 0.04                           | 0.06                           | 0.12                           | 11.3 |
| 4506                          | 8  | 0.06                           | 0.12                           | 0.19                           | 11.8 |
| 4507                          | 8  | 0.06                           | 0.06                           | 0.10                           | 11.3 |
| 4508                          | 8  | 0.04                           | 0.04                           | 0.08                           | 11.5 |
| 4509                          | 8  | 0.08                           | 0.04                           | 0.08                           | 11.5 |
| 4510                          | 8  | 0.04                           | 0.04                           | 0.11                           | 11.3 |
| 4511                          | 29 | 0.08                           | 0.04                           | 0.12                           | 11.9 |
| 4512                          | 29 | 0.04                           | 0.06                           | 0.20                           | 11.4 |
| 4513                          | 29 | 0.04                           | 0.04                           | 0.10                           | 12.4 |
| 4514                          | 29 | 0.07                           | 0.09                           | 0.26                           | 12.0 |
| 4515                          | 29 | 0.08                           | 0.04                           | 0.08                           | 12.6 |



2759-001  
A Single Dose Toxicity Study of Test Article Administered by Intrathecal Injection in Rats

Individual Blood Cell Morphology

Sex: Female

| Mid Dose                      |    | Blood Cell Morphology | Nucleated RBC | Polychromasia | Heinz Bodies | Basophilic Stippling | Pappenheimer Bodies |
|-------------------------------|----|-----------------------|---------------|---------------|--------------|----------------------|---------------------|
| Day(s) Relative to Start Date |    |                       |               |               |              |                      |                     |
| 3501                          | 91 | Findings              | 0             | 1+            | 0            | 0                    | 0                   |

|  |
|--|
|  |
|--|

2759-001  
 A Single Dose Toxicity Study of Test Article Administered by Intrathecal Injection in Rats

Individual Blood Cell Morphology

Sex: Female

| Mid Dose                      |    | Howell-Jolly Bodies | Echinocyte (Burr Cells) | Spherocyte | Schistocyte | Acanthocyte | Keratocyte, Blister Cell |
|-------------------------------|----|---------------------|-------------------------|------------|-------------|-------------|--------------------------|
| Day(s) Relative to Start Date |    |                     |                         |            |             |             |                          |
| 3501                          | 91 | 0                   | 0                       | 0          | 0           | 0           | 0                        |



2759-001  
A Single Dose Toxicity Study of Test Article Administered by Intrathecal Injection in Rats

Individual Blood Cell Morphology

Sex: Female

| Mid Dose                      |    | Eccentrocyte | Unclassified Poik | Ghost Cells | Rouleaux | RBC Agglutination | NCC |
|-------------------------------|----|--------------|-------------------|-------------|----------|-------------------|-----|
| Day(s) Relative to Start Date |    |              |                   |             |          |                   |     |
| 3501                          | 91 | 0            | 0                 | 0           | 0        | 0                 | 0   |



2759-001  
A Single Dose Toxicity Study of Test Article Administered by Intrathecal Injection in Rats

Individual Blood Cell Morphology

Sex: Female

| Mid Dose                      |    |              |                |                     |                    |                         |                         |
|-------------------------------|----|--------------|----------------|---------------------|--------------------|-------------------------|-------------------------|
| Day(s) Relative to Start Date |    | Smudge Cells | Pyknotic Cells | Reactive Lymphocyte | Reactive Monocytes | Leukocyte Agglutination | Platelet Estimate Count |
| 3501                          | 91 | 0            | 0              | 0                   | 0                  | 0                       | CAC                     |



2759-001  
A Single Dose Toxicity Study of Test Article Administered by Intrathecal Injection in Rats

Individual Blood Cell Morphology

Sex: Female

| Mid Dose                      |    |                 |                 |
|-------------------------------|----|-----------------|-----------------|
| Day(s) Relative to Start Date |    | Platelet Clumps | Large Platelets |
| 3501                          | 91 | Present         | 0               |



Appendix 2  
Individual Coagulation Values



Codes for Individual Coagulation Values

- APTT - Activated Partial Thromboplastin Time
- CT - Clotted Sample
- QNS - Quantity Not Sufficient

2759-001  
A Single Dose Toxicity Study of Test Article Administered by Intrathecal Injection in Rats

Individual Coagulation Values

Sex: Male

| Vehicle                       |    | APTT  | Prothrombin Time | Fibrinogen |
|-------------------------------|----|-------|------------------|------------|
| Day(s) Relative to Start Date |    | (sec) | (sec)            | (mg/dL)    |
| 1001                          | 91 | 17.5  | 17.6             | 270        |
| 1002                          | 91 | 16.5  | 17.9             | 304        |
| 1003                          | 91 | 13.8  | 16.6             | 314        |
| 1004                          | 91 | 17.4  | 17.1             | 349        |
| 1005                          | 91 | 14.5  | 18.2             | 420        |
| 1006                          | 8  | 12.5  | 17.2             | 379        |
| 1007                          | 8  | 18.7  | 17.0             | 301        |
| 1008                          | 8  | 14.6  | 16.8             | 322        |
| 1009                          | 8  | 13.5  | 16.9             | 333        |
| 1010                          | 8  | QNS   | 16.8             | QNS        |
| 1011                          | 29 | 14.9  | 16.7             | 299        |
| 1012                          | 29 | 17.9  | 17.0             | 251        |
| 1013                          | 29 | CT    | CT               | CT         |
| 1014                          | 29 | 20.1  | 17.5             | 271        |
| 1015                          | 29 | 16.4  | 16.7             | 287        |



2759-001  
A Single Dose Toxicity Study of Test Article Administered by Intrathecal Injection in Rats

Individual Coagulation Values

Sex: Male

| Low Dose                      |    |       |                  |            |
|-------------------------------|----|-------|------------------|------------|
|                               |    | APTT  | Prothrombin Time | Fibrinogen |
| Day(s) Relative to Start Date |    | (sec) | (sec)            | (mg/dL)    |
| 2001                          | 91 | 20.9  | 16.8             | 310        |
| 2002                          | 91 | 14.5  | 17.1             | 345        |
| 2003                          | 91 | 17.4  | 17.8             | 284        |
| 2004                          | 91 | 15.4  | 16.8             | 320        |
| 2005                          | 91 | 18.3  | 17.9             | 304        |
| 2006                          | 8  | 16.4  | 17.3             | 367        |
| 2007                          | 8  | 14.2  | 17.9             | 335        |
| 2008                          | 8  | 13.5  | 18.7             | 299        |
| 2009                          | 8  | 14.4  | 19.0             | 274        |
| 2010                          | 8  | 15.4  | 19.6             | 282        |
| 2011                          | 29 | 17.3  | 15.9             | 310        |
| 2012                          | 29 | 16.7  | 16.2             | 303        |
| 2013                          | 29 | 14.6  | 16.0             | 338        |
| 2014                          | 29 | 18.6  | 16.9             | 295        |
| 2015                          | 29 | 16.5  | 16.5             | 314        |



2759-001  
A Single Dose Toxicity Study of Test Article Administered by Intrathecal Injection in Rats

Individual Coagulation Values

Sex: Male

| Mid Dose                      |    | APTT  | Prothrombin Time | Fibrinogen |
|-------------------------------|----|-------|------------------|------------|
| Day(s) Relative to Start Date |    | (sec) | (sec)            | (mg/dL)    |
| 3001                          | 91 | 19.0  | 19.8             | 299        |
| 3002                          | 91 | 18.0  | 16.9             | 333        |
| 3003                          | 91 | 14.2  | 18.8             | 370        |
| 3004                          | 91 | 13.3  | 17.5             | 340        |
| 3005                          | 91 | 16.0  | 16.5             | 349        |
| 3006                          | 8  | 15.0  | 17.6             | 342        |
| 3007                          | 8  | 16.0  | 17.9             | 316        |
| 3008                          | 8  | 17.7  | 17.8             | 316        |
| 3009                          | 8  | 17.1  | 17.8             | 329        |
| 3010                          | 8  | 15.8  | 17.5             | 299        |
| 3011                          | 29 | 20.9  | 18.3             | 297        |
| 3012                          | 29 | 18.4  | 16.6             | 352        |
| 3013                          | 29 | 17.7  | 16.9             | 320        |
| 3014                          | 29 | 15.8  | 16.9             | 349        |
| 3015                          | 29 | 17.9  | 15.9             | 299        |



2759-001  
 A Single Dose Toxicity Study of Test Article Administered by Intrathecal Injection in Rats

Individual Coagulation Values

Sex: Male

| High Dose                     |    | APTT  | Prothrombin Time | Fibrinogen |
|-------------------------------|----|-------|------------------|------------|
| Day(s) Relative to Start Date |    | (sec) | (sec)            | (mg/dL)    |
| 4001                          | 91 | 18.2  | 16.5             | 400        |
| 4002                          | 91 | 14.6  | 17.5             | 362        |
| 4003                          | 91 | 15.9  | 18.1             | 320        |
| 4004                          | 91 | 20.4  | 16.4             | 362        |
| 4005                          | 91 | 14.4  | 16.5             | 376        |
| 4006                          | 8  | 14.8  | 17.5             | 318        |
| 4007                          | 8  | 14.9  | 17.4             | 304        |
| 4008                          | 8  | 14.5  | 16.7             | 301        |
| 4009                          | 8  | 14.8  | 17.2             | 335        |
| 4010                          | 8  | 14.8  | 17.3             | 318        |
| 4011                          | 29 | 16.9  | 16.5             | 301        |
| 4012                          | 29 | 15.1  | 17.4             | 362        |
| 4013                          | 29 | 14.3  | 16.1             | 365        |
| 4014                          | 29 | 14.2  | 16.1             | 349        |
| 4015                          | 29 | 16.6  | 15.0             | 352        |



2759-001  
 A Single Dose Toxicity Study of Test Article Administered by Intrathecal Injection in Rats

Individual Coagulation Values

Sex: Female

| Vehicle                       |    | APTT  | Prothrombin Time | Fibrinogen |
|-------------------------------|----|-------|------------------|------------|
| Day(s) Relative to Start Date |    | (sec) | (sec)            | (mg/dL)    |
| 1501                          | 91 | CT    | CT               | CT         |
| 1502                          | 91 | 13.3  | 17.6             | 231        |
| 1503                          | 91 | 19.5  | 16.6             | 261        |
| 1504                          | 91 | 18.1  | 17.6             | 215        |
| 1505                          | 91 | 15.4  | 16.8             | 256        |
| 1506                          | 8  | 18.1  | 17.3             | 282        |
| 1507                          | 8  | 13.1  | 17.1             | 279        |
| 1508                          | 8  | 13.9  | 16.3             | 301        |
| 1509                          | 8  | 13.8  | 18.8             | 282        |
| 1510                          | 8  | 13.2  | 17.9             | 231        |
| 1511                          | 29 | 18.2  | 17.7             | 261        |
| 1512                          | 29 | 15.7  | 17.0             | 306        |
| 1513                          | 29 | 15.6  | 17.2             | 247        |
| 1514                          | 29 | 15.8  | 17.3             | 237        |
| 1515                          | 29 | 16.0  | 16.9             | 359        |



2759-001  
A Single Dose Toxicity Study of Test Article Administered by Intrathecal Injection in Rats

Individual Coagulation Values

Sex: Female

| Low Dose                      |    | APTT  | Prothrombin Time | Fibrinogen |
|-------------------------------|----|-------|------------------|------------|
| Day(s) Relative to Start Date |    | (sec) | (sec)            | (mg/dL)    |
| 2501                          | 91 | 21.8  | 17.1             | 215        |
| 2502                          | 91 | 15.7  | 17.2             | 226        |
| 2503                          | 91 | 15.5  | 16.6             | 214        |
| 2504                          | 91 | 15.0  | 16.8             | 217        |
| 2505                          | 91 | 12.5  | 16.0             | 222        |
| 2506                          | 8  | 12.8  | 17.7             | 282        |
| 2507                          | 8  | 12.5  | 18.6             | 276        |
| 2508                          | 8  | 15.3  | 18.0             | 299        |
| 2509                          | 8  | 14.8  | 16.9             | 335        |
| 2510                          | 8  | QNS   | 15.6             | 267        |
| 2511                          | 29 | 17.7  | 15.2             | 210        |
| 2512                          | 29 | 13.4  | 17.1             | 284        |
| 2513                          | 29 | 17.1  | 17.4             | 271        |
| 2514                          | 29 | 16.3  | 16.9             | 225        |
| 2515                          | 29 | 17.6  | 16.4             | 232        |



2759-001  
A Single Dose Toxicity Study of Test Article Administered by Intrathecal Injection in Rats

Individual Coagulation Values

Sex: Female

| Mid Dose                      |    | APTT  | Prothrombin Time | Fibrinogen |
|-------------------------------|----|-------|------------------|------------|
| Day(s) Relative to Start Date |    | (sec) | (sec)            | (mg/dL)    |
| 3501                          | 91 | 20.1  | 18.7             | 208        |
| 3502                          | 91 | 16.9  | 16.6             | 219        |
| 3503                          | 91 | 16.3  | 17.1             | 225        |
| 3504                          | 91 | 11.9  | 16.3             | 229        |
| 3505                          | 91 | 16.7  | 16.4             | 221        |
| 3506                          | 8  | 13.2  | 17.5             | 281        |
| 3507                          | 8  | 13.2  | 17.5             | 273        |
| 3508                          | 8  | 14.0  | 17.1             | 274        |
| 3509                          | 8  | 11.7  | 16.7             | 297        |
| 3510                          | 8  | 9.0   | 17.2             | 295        |
| 3511                          | 29 | 14.1  | 18.5             | 196        |
| 3512                          | 29 | 15.9  | 16.5             | 251        |
| 3513                          | 29 | 16.1  | 17.1             | 227        |
| 3514                          | 29 | 15.1  | 15.9             | 245        |
| 3515                          | 29 | 19.1  | 16.4             | 271        |





2759-001  
A Single Dose Toxicity Study of Test Article Administered by Intrathecal Injection in Rats

Individual Coagulation Values

Sex: Female

| High Dose                     |    |       |                  |            |
|-------------------------------|----|-------|------------------|------------|
|                               |    | APTT  | Prothrombin Time | Fibrinogen |
| Day(s) Relative to Start Date |    | (sec) | (sec)            | (mg/dL)    |
| 4501                          | 91 | CT    | CT               | CT         |
| 4502                          | 91 | 16.4  | 16.5             | 241        |
| 4503                          | 91 | 14.1  | 15.7             | 242        |
| 4504                          | 91 | CT    | CT               | CT         |
| 4505                          | 91 | 15.0  | 16.5             | 201        |
| 4506                          | 8  | 13.1  | 17.2             | 308        |
| 4507                          | 8  | 11.4  | 16.9             | 234        |
| 4508                          | 8  | 14.1  | 16.6             | 285        |
| 4509                          | 8  | 13.7  | 16.5             | 289        |
| 4510                          | 8  | 15.9  | 16.0             | 281        |
| 4511                          | 29 | 17.8  | 17.6             | 273        |
| 4512                          | 29 | 16.6  | 16.6             | 233        |
| 4513                          | 29 | 20.6  | 17.5             | 231        |
| 4514                          | 29 | 15.9  | 16.4             | 276        |
| 4515                          | 29 | 17.4  | 17.5             | 221        |



Appendix 3  
Individual Clinical Chemistry Values

#### Codes for Individual Clinical Chemistry Values

- AST - Aspartate Aminotransferase
- ALT - Alanine Aminotransferase
- ALP - Alkaline Phosphatase

#### Hemolytic Index Result Reference Guide

- 0 - No Hemolysis
- 1 - Slight Hemolysis
- 2 - Hemolyzed

2759-001  
A Single Dose Toxicity Study of Test Article Administered by Intrathecal Injection in Rats

Individual Clinical Chemistry Values

Sex: Male

| Vehicle                       |    | Sodium  | Potassium | Chloride | Calcium | Phosphorus | ALP   | Total Bilirubin | AST   | ALT   | Urea Nitrogen |
|-------------------------------|----|---------|-----------|----------|---------|------------|-------|-----------------|-------|-------|---------------|
| Day(s) Relative to Start Date |    | (mEq/L) | (mEq/L)   | (mEq/L)  | (mg/dL) | (mg/dL)    | (U/L) | (mg/dL)         | (U/L) | (U/L) | (mg/dL)       |
| 1001                          | 91 | 142     | 11.4      | 102      | 12.2    | 12.5       | 108   | 0.2             | 90    | 71    | 16            |
| 1002                          | 91 | 141     | 13.6      | 100      | 12.7    | 12.9       | 105   | 0.1             | 169   | 89    | 15            |
| 1003                          | 91 | 142     | 10.2      | 98       | 12.1    | 13.2       | 109   | 0.2             | 180   | 88    | 18            |
| 1004                          | 91 | 143     | 12.4      | 101      | 11.8    | 14.4       | 127   | 0.1             | 268   | 240   | 16            |
| 1005                          | 91 | 140     | 13.2      | 97       | 12.1    | 14.2       | 93    | 0.1             | 265   | 211   | 33            |
| 1006                          | 8  | 141     | 9.3       | 98       | 14.4    | 14.7       | 490   | 0.1             | 85    | 70    | 20            |
| 1007                          | 8  | 141     | 12.6      | 103      | 12.8    | 15.4       | 265   | 0.1             | 84    | 43    | 16            |
| 1008                          | 8  | 141     | 9.8       | 101      | 12.0    | 14.4       | 394   | 0.2             | 102   | 59    | 17            |
| 1009                          | 8  | 141     | 10.4      | 101      | 13.8    | 13.8       | 432   | 0.1             | 90    | 49    | 20            |
| 1010                          | 8  | 142     | 9.1       | 97       | 14.9    | 15.4       | 354   | 0.1             | 84    | 51    | 27            |
| 1011                          | 29 | 144     | 9.0       | 99       | 13.6    | 11.5       | 195   | 0.1             | 79    | 31    | 14            |
| 1012                          | 29 | 141     | 12.4      | 102      | 12.0    | 14.0       | 151   | 0.2             | 95    | 43    | 18            |
| 1013                          | 29 | 144     | 11.2      | 104      | 12.2    | 13.2       | 194   | 0.1             | 90    | 48    | 17            |
| 1014                          | 29 | 143     | 12.8      | 102      | 12.0    | 13.5       | 224   | 0.1             | 94    | 51    | 14            |
| 1015                          | 29 | 141     | 11.6      | 98       | 13.8    | 13.7       | 168   | 0.1             | 72    | 28    | 12            |



2759-001  
A Single Dose Toxicity Study of Test Article Administered by Intrathecal Injection in Rats

Individual Clinical Chemistry Values

Sex: Male

| Vehicle                       |    | Creatinine | Total Protein | Albumin | Globulin | Albumin/<br>Globulin | Triglyceride | Cholesterol | Glucose | Hemolytic Index |
|-------------------------------|----|------------|---------------|---------|----------|----------------------|--------------|-------------|---------|-----------------|
| Day(s) Relative to Start Date |    | (mg/dL)    | (g/dL)        | (g/dL)  | (g/dL)   |                      | (mg/dL)      | (mg/dL)     | (mg/dL) |                 |
| 1001                          | 91 | 0.5        | 6.6           | 3.4     | 3.2      | 1.1                  | 66           | 43          | 367     | 0               |
| 1002                          | 91 | 0.6        | 7.0           | 3.4     | 3.6      | 0.9                  | 123          | 66          | 443     | 0               |
| 1003                          | 91 | 0.5        | 6.7           | 3.2     | 3.5      | 0.9                  | 66           | 100         | 292     | 1               |
| 1004                          | 91 | 0.5        | 6.6           | 3.3     | 3.3      | 1.0                  | 80           | 88          | 255     | 1               |
| 1005                          | 91 | 0.6        | 7.0           | 3.2     | 3.8      | 0.8                  | 77           | 77          | 219     | 1               |
| 1006                          | 8  | 0.4        | 6.4           | 3.4     | 3.0      | 1.1                  | 134          | 64          | 629     | 0               |
| 1007                          | 8  | 0.4        | 5.8           | 3.3     | 2.5      | 1.3                  | 157          | 62          | 309     | 0               |
| 1008                          | 8  | 0.4        | 6.1           | 3.5     | 2.6      | 1.3                  | 74           | 71          | 82      | 0               |
| 1009                          | 8  | 0.5        | 6.8           | 3.7     | 3.1      | 1.2                  | 88           | 70          | 445     | 0               |
| 1010                          | 8  | 0.6        | 7.3           | 3.7     | 3.6      | 1.0                  | 127          | 69          | 589     | 0               |
| 1011                          | 29 | 0.5        | 6.7           | 3.4     | 3.3      | 1.0                  | 96           | 50          | 584     | 0               |
| 1012                          | 29 | 0.4        | 6.1           | 3.3     | 2.8      | 1.2                  | 68           | 45          | 209     | 0               |
| 1013                          | 29 | 0.5        | 6.5           | 3.3     | 3.2      | 1.0                  | 72           | 64          | 209     | 0               |
| 1014                          | 29 | 0.4        | 6.5           | 3.4     | 3.1      | 1.1                  | 95           | 58          | 161     | 0               |
| 1015                          | 29 | 0.4        | 6.6           | 3.3     | 3.3      | 1.0                  | 91           | 33          | 649     | 0               |



2759-001  
A Single Dose Toxicity Study of Test Article Administered by Intrathecal Injection in Rats

Individual Clinical Chemistry Values

Sex: Male

| Low Dose                      |    | Sodium  | Potassium | Chloride | Calcium | Phosphorus | ALP   | Total Bilirubin | AST   | ALT   | Urea Nitrogen |
|-------------------------------|----|---------|-----------|----------|---------|------------|-------|-----------------|-------|-------|---------------|
| Day(s) Relative to Start Date |    | (mEq/L) | (mEq/L)   | (mEq/L)  | (mg/dL) | (mg/dL)    | (U/L) | (mg/dL)         | (U/L) | (U/L) | (mg/dL)       |
| 2001                          | 91 | 142     | 15.0      | 102      | 12.4    | 13.9       | 91    | 0.1             | 106   | 58    | 15            |
| 2002                          | 91 | 140     | 15.4      | 98       | 13.2    | 15.7       | 79    | 0.1             | 94    | 60    | 16            |
| 2003                          | 91 | 143     | 11.8      | 100      | 12.4    | 13.4       | 156   | 0.1             | 93    | 57    | 17            |
| 2004                          | 91 | 148     | 9.2       | 100      | 12.6    | 12.2       | 96    | 0.1             | 107   | 46    | 16            |
| 2005                          | 91 | 145     | 9.4       | 101      | 13.2    | 12.5       | 103   | 0.1             | 96    | 42    | 15            |
| 2006                          | 8  | 142     | 8.1       | 104      | 13.5    | 13.2       | 264   | 0.1             | 65    | 44    | 18            |
| 2007                          | 8  | 145     | 6.1       | 98       | 13.7    | 11.8       | 301   | 0.1             | 69    | 42    | 19            |
| 2008                          | 8  | 141     | 9.5       | 99       | 14.0    | 14.6       | 238   | 0.1             | 67    | 26    | 19            |
| 2009                          | 8  | 145     | 10.0      | 105      | 12.5    | 14.2       | 535   | 0.1             | 102   | 74    | 18            |
| 2010                          | 8  | 144     | 9.6       | 102      | 12.2    | 13.5       | 249   | 0.1             | 90    | 74    | 15            |
| 2011                          | 29 | 144     | 14.6      | 103      | 12.9    | 16.4       | 136   | 0.1             | 61    | 31    | 12            |
| 2012                          | 29 | 141     | 11.8      | 98       | 13.4    | 14.0       | 190   | 0.1             | 83    | 41    | 15            |
| 2013                          | 29 | 144     | 11.0      | 99       | 13.3    | 14.4       | 168   | 0.1             | 68    | 34    | 12            |
| 2014                          | 29 | 140     | 12.2      | 100      | 12.6    | 13.9       | 228   | 0.1             | 99    | 34    | 16            |
| 2015                          | 29 | 143     | 9.9       | 100      | 12.2    | 12.2       | 72    | 0.2             | 68    | 26    | 15            |



2759-001  
A Single Dose Toxicity Study of Test Article Administered by Intrathecal Injection in Rats

Individual Clinical Chemistry Values

Sex: Male

| Low Dose                      |    | Creatinine | Total Protein | Albumin | Globulin | Albumin/<br>Globulin | Triglyceride | Cholesterol | Glucose | Hemolytic Index |
|-------------------------------|----|------------|---------------|---------|----------|----------------------|--------------|-------------|---------|-----------------|
| Day(s) Relative to Start Date |    | (mg/dL)    | (g/dL)        | (g/dL)  | (g/dL)   |                      | (mg/dL)      | (mg/dL)     | (mg/dL) |                 |
| 2001                          | 91 | 0.5        | 6.8           | 3.5     | 3.3      | 1.1                  | 72           | 86          | 195     | 1               |
| 2002                          | 91 | 0.5        | 6.7           | 3.4     | 3.3      | 1.0                  | 112          | 72          | 390     | 0               |
| 2003                          | 91 | 0.5        | 6.7           | 3.3     | 3.4      | 1.0                  | 54           | 83          | 331     | 0               |
| 2004                          | 91 | 0.5        | 6.9           | 3.4     | 3.5      | 1.0                  | 69           | 96          | 305     | 1               |
| 2005                          | 91 | 0.6        | 6.9           | 3.4     | 3.5      | 1.0                  | 59           | 53          | 350     | 0               |
| 2006                          | 8  | 0.4        | 6.1           | 3.5     | 2.6      | 1.3                  | 70           | 68          | 382     | 0               |
| 2007                          | 8  | 0.4        | 6.3           | 3.6     | 2.7      | 1.3                  | 69           | 91          | 388     | 0               |
| 2008                          | 8  | 0.4        | 6.0           | 3.4     | 2.6      | 1.3                  | 64           | 67          | 383     | 0               |
| 2009                          | 8  | 0.4        | 5.6           | 3.0     | 2.6      | 1.2                  | 54           | 57          | 361     | 0               |
| 2010                          | 8  | 0.3        | 6.0           | 3.2     | 2.8      | 1.1                  | 51           | 66          | 237     | 0               |
| 2011                          | 29 | 0.4        | 6.3           | 3.3     | 3.0      | 1.1                  | 78           | 47          | 387     | 0               |
| 2012                          | 29 | 0.5        | 6.8           | 3.6     | 3.2      | 1.1                  | 77           | 76          | 409     | 0               |
| 2013                          | 29 | 0.4        | 6.8           | 3.4     | 3.4      | 1.0                  | 72           | 84          | 408     | 0               |
| 2014                          | 29 | 0.3        | 6.8           | 3.6     | 3.2      | 1.1                  | 44           | 66          | 231     | 2               |
| 2015                          | 29 | 0.4        | 6.6           | 3.4     | 3.2      | 1.1                  | 55           | 87          | 262     | 1               |



2759-001  
A Single Dose Toxicity Study of Test Article Administered by Intrathecal Injection in Rats

Individual Clinical Chemistry Values

Sex: Male

| Mid Dose                      |    | Sodium  | Potassium | Chloride | Calcium | Phosphorus | ALP   | Total Bilirubin | AST   | ALT   | Urea Nitrogen |
|-------------------------------|----|---------|-----------|----------|---------|------------|-------|-----------------|-------|-------|---------------|
| Day(s) Relative to Start Date |    | (mEq/L) | (mEq/L)   | (mEq/L)  | (mg/dL) | (mg/dL)    | (U/L) | (mg/dL)         | (U/L) | (U/L) | (mg/dL)       |
| 3001                          | 91 | 137     | 18.4      | 100      | 13.1    | 16.6       | 67    | 0.2             | 166   | 104   | 19            |
| 3002                          | 91 | 142     | 11.8      | 100      | 12.8    | 13.3       | 81    | 0.1             | 104   | 38    | 18            |
| 3003                          | 91 | 143     | 11.4      | 97       | 14.2    | 13.8       | 80    | 0.1             | 109   | 55    | 18            |
| 3004                          | 91 | 138     | 15.2      | 97       | 13.1    | 15.7       | 88    | 0.1             | 175   | 136   | 15            |
| 3005                          | 91 | 144     | 9.9       | 98       | 13.7    | 11.7       | 88    | 0.1             | 104   | 54    | 16            |
| 3006                          | 8  | 143     | 7.8       | 99       | 13.4    | 13.3       | 218   | 0.1             | 71    | 38    | 16            |
| 3007                          | 8  | 142     | 9.0       | 102      | 13.2    | 15.3       | 239   | 0.1             | 71    | 40    | 15            |
| 3008                          | 8  | 141     | 11.8      | 101      | 12.8    | 16.0       | 303   | 0.1             | 79    | 48    | 13            |
| 3009                          | 8  | 141     | 9.4       | 100      | 12.9    | 13.9       | 266   | 0.1             | 75    | 49    | 16            |
| 3010                          | 8  | 141     | 9.3       | 99       | 12.9    | 13.7       | 204   | 0.1             | 75    | 43    | 15            |
| 3011                          | 29 | 142     | 9.9       | 99       | 12.7    | 12.1       | 123   | 0.1             | 72    | 29    | 14            |
| 3012                          | 29 | 141     | 12.8      | 102      | 12.4    | 15.3       | 149   | 0.1             | 91    | 45    | 15            |
| 3013                          | 29 | 139     | 10.6      | 99       | 12.9    | 14.1       | 158   | 0.1             | 79    | 31    | 18            |
| 3014                          | 29 | 143     | 9.5       | 99       | 13.5    | 13.7       | 262   | 0.1             | 99    | 48    | 16            |
| 3015                          | 29 | 143     | 9.0       | 100      | 13.1    | 12.6       | 211   | 0.1             | 87    | 39    | 14            |





2759-001  
A Single Dose Toxicity Study of Test Article Administered by Intrathecal Injection in Rats

Individual Clinical Chemistry Values

Sex: Male

| Mid Dose                      |    | Creatinine | Total Protein | Albumin | Globulin | Albumin/<br>Globulin | Triglyceride | Cholesterol | Glucose | Hemolytic Index |
|-------------------------------|----|------------|---------------|---------|----------|----------------------|--------------|-------------|---------|-----------------|
| Day(s) Relative to Start Date |    | (mg/dL)    | (g/dL)        | (g/dL)  | (g/dL)   |                      | (mg/dL)      | (mg/dL)     | (mg/dL) |                 |
| 3001                          | 91 | 0.5        | 7.1           | 3.4     | 3.7      | 0.9                  | 81           | 69          | 265     | 1               |
| 3002                          | 91 | 0.5        | 7.0           | 3.5     | 3.5      | 1.0                  | 69           | 74          | 394     | 0               |
| 3003                          | 91 | 0.5        | 7.4           | 3.4     | 4.0      | 0.9                  | 110          | 77          | 528     | 0               |
| 3004                          | 91 | 0.5        | 7.0           | 3.4     | 3.6      | 0.9                  | 134          | 83          | 343     | 0               |
| 3005                          | 91 | 0.5        | 7.1           | 3.3     | 3.8      | 0.9                  | 195          | 67          | 486     | 0               |
| 3006                          | 8  | 0.4        | 6.2           | 3.4     | 2.8      | 1.2                  | 62           | 70          | 448     | 0               |
| 3007                          | 8  | 0.3        | 5.9           | 3.3     | 2.6      | 1.3                  | 55           | 68          | 325     | 0               |
| 3008                          | 8  | 0.4        | 6.5           | 3.3     | 3.2      | 1.0                  | 65           | 109         | 122     | 0               |
| 3009                          | 8  | 0.4        | 6.3           | 3.3     | 3.0      | 1.1                  | 79           | 73          | 260     | 0               |
| 3010                          | 8  | 0.4        | 6.4           | 3.4     | 3.0      | 1.1                  | 71           | 86          | 311     | 0               |
| 3011                          | 29 | 0.4        | 7.3           | 3.6     | 3.7      | 1.0                  | 82           | 71          | 368     | 0               |
| 3012                          | 29 | 0.4        | 7.0           | 3.3     | 3.7      | 0.9                  | 61           | 57          | 162     | 1               |
| 3013                          | 29 | 0.4        | 6.6           | 3.2     | 3.4      | 0.9                  | 100          | 58          | 483     | 0               |
| 3014                          | 29 | 0.5        | 6.5           | 3.2     | 3.3      | 1.0                  | 51           | 67          | 409     | 0               |
| 3015                          | 29 | 0.5        | 6.8           | 3.3     | 3.5      | 0.9                  | 53           | 64          | 333     | 0               |



2759-001  
A Single Dose Toxicity Study of Test Article Administered by Intrathecal Injection in Rats

Individual Clinical Chemistry Values

Sex: Male

| High Dose                     |    | Sodium  | Potassium | Chloride | Calcium | Phosphorus | ALP   | Total Bilirubin | AST   | ALT   | Urea Nitrogen |
|-------------------------------|----|---------|-----------|----------|---------|------------|-------|-----------------|-------|-------|---------------|
| Day(s) Relative to Start Date |    | (mEq/L) | (mEq/L)   | (mEq/L)  | (mg/dL) | (mg/dL)    | (U/L) | (mg/dL)         | (U/L) | (U/L) | (mg/dL)       |
| 4001                          | 91 | 143     | 8.6       | 99       | 12.8    | 11.1       | 78    | 0.1             | 66    | 36    | 18            |
| 4002                          | 91 | 141     | 10.6      | 99       | 12.7    | 12.1       | 120   | 0.2             | 251   | 178   | 17            |
| 4003                          | 91 | 139     | 11.8      | 98       | 13.9    | 12.6       | 128   | 0.1             | 93    | 87    | 17            |
| 4004                          | 91 | 144     | 10.6      | 100      | 13.1    | 13.5       | 90    | 0.1             | 92    | 29    | 16            |
| 4005                          | 91 | 141     | 9.5       | 97       | 13.4    | 11.3       | 72    | 0.1             | 77    | 35    | 15            |
| 4006                          | 8  | 145     | 9.3       | 99       | 12.3    | 14.1       | 361   | 0.1             | 86    | 45    | 15            |
| 4007                          | 8  | 143     | 12.0      | 100      | 12.4    | 15.1       | 274   | 0.1             | 87    | 41    | 13            |
| 4008                          | 8  | 144     | 11.0      | 100      | 13.2    | 17.4       | 278   | 0.1             | 88    | 50    | 15            |
| 4009                          | 8  | 143     | 10.6      | 102      | 13.2    | 14.5       | 263   | 0.1             | 66    | 52    | 14            |
| 4010                          | 8  | 142     | 10.0      | 100      | 12.7    | 15.0       | 358   | 0.1             | 86    | 61    | 13            |
| 4011                          | 29 | 141     | 10.8      | 100      | 13.1    | 13.5       | 127   | 0.1             | 71    | 30    | 15            |
| 4012                          | 29 | 141     | 11.0      | 96       | 13.3    | 12.8       | 168   | 0.1             | 66    | 23    | 16            |
| 4013                          | 29 | 143     | 8.6       | 99       | 13.1    | 12.7       | 242   | 0.1             | 77    | 38    | 18            |
| 4014                          | 29 | 142     | 8.6       | 100      | 13.4    | 12.9       | 256   | 0.1             | 89    | 43    | 16            |
| 4015                          | 29 | 141     | 11.2      | 100      | 12.7    | 13.1       | 161   | 0.1             | 108   | 44    | 15            |



2759-001  
A Single Dose Toxicity Study of Test Article Administered by Intrathecal Injection in Rats

Individual Clinical Chemistry Values

Sex: Male

| High Dose                        |    | Creatinine | Total Protein | Albumin | Globulin | Albumin/<br>Globulin | Triglyceride | Cholesterol | Glucose | Hemolytic<br>Index |
|----------------------------------|----|------------|---------------|---------|----------|----------------------|--------------|-------------|---------|--------------------|
| Day(s) Relative to<br>Start Date |    | (mg/dL)    | (g/dL)        | (g/dL)  | (g/dL)   |                      | (mg/dL)      | (mg/dL)     | (mg/dL) |                    |
| 4001                             | 91 | 0.5        | 7.4           | 3.3     | 4.1      | 0.8                  | 90           | 109         | 373     | 0                  |
| 4002                             | 91 | 0.5        | 6.9           | 3.2     | 3.7      | 0.9                  | 59           | 93          | 367     | 1                  |
| 4003                             | 91 | 0.6        | 6.9           | 3.4     | 3.5      | 1.0                  | 86           | 66          | 545     | 0                  |
| 4004                             | 91 | 0.5        | 7.1           | 3.5     | 3.6      | 1.0                  | 76           | 65          | 418     | 0                  |
| 4005                             | 91 | 0.5        | 7.6           | 3.6     | 4.0      | 0.9                  | 77           | 79          | 413     | 0                  |
| 4006                             | 8  | 0.4        | 6.5           | 3.5     | 3.0      | 1.2                  | 71           | 73          | 126     | 0                  |
| 4007                             | 8  | 0.4        | 6.4           | 3.5     | 2.9      | 1.2                  | 73           | 57          | 110     | 0                  |
| 4008                             | 8  | 0.4        | 6.2           | 3.4     | 2.8      | 1.2                  | 36           | 84          | 140     | 0                  |
| 4009                             | 8  | 0.4        | 6.2           | 3.3     | 2.9      | 1.1                  | 60           | 86          | 303     | 0                  |
| 4010                             | 8  | 0.3        | 6.2           | 3.3     | 2.9      | 1.1                  | 48           | 71          | 227     | 0                  |
| 4011                             | 29 | 0.4        | 6.3           | 3.2     | 3.1      | 1.0                  | 66           | 58          | 343     | 0                  |
| 4012                             | 29 | 0.5        | 6.7           | 3.3     | 3.4      | 1.0                  | 143          | 97          | 522     | 0                  |
| 4013                             | 29 | 0.5        | 6.7           | 3.3     | 3.4      | 1.0                  | 39           | 65          | 333     | 0                  |
| 4014                             | 29 | 0.5        | 6.8           | 3.3     | 3.5      | 0.9                  | 60           | 70          | 382     | 0                  |
| 4015                             | 29 | 0.5        | 6.9           | 3.4     | 3.5      | 1.0                  | 38           | 68          | 241     | 0                  |



2759-001  
A Single Dose Toxicity Study of Test Article Administered by Intrathecal Injection in Rats

Individual Clinical Chemistry Values

Sex: Female

| Vehicle                       |    | Sodium  | Potassium | Chloride | Calcium | Phosphorus | ALP   | Total Bilirubin | AST   | ALT   | Urea Nitrogen |
|-------------------------------|----|---------|-----------|----------|---------|------------|-------|-----------------|-------|-------|---------------|
| Day(s) Relative to Start Date |    | (mEq/L) | (mEq/L)   | (mEq/L)  | (mg/dL) | (mg/dL)    | (U/L) | (mg/dL)         | (U/L) | (U/L) | (mg/dL)       |
| 1501                          | 91 | 144     | 13.2      | 106      | 12.4    | 13.0       | 29    | 0.1             | 88    | 50    | 16            |
| 1502                          | 91 | 141     | 16.0      | 102      | 13.1    | 13.4       | 61    | 0.2             | 73    | 53    | 19            |
| 1503                          | 91 | 137     | 15.4      | 100      | 12.5    | 15.0       | 57    | 0.1             | 141   | 81    | 13            |
| 1504                          | 91 | 138     | 12.2      | 101      | 12.4    | 13.1       | 59    | 0.2             | 114   | 71    | 15            |
| 1505                          | 91 | 141     | 11.8      | 100      | 13.5    | 12.3       | 54    | 0.1             | 78    | 34    | 14            |
| 1506                          | 8  | 140     | 10.6      | 103      | 13.0    | 13.8       | 192   | 0.1             | 64    | 30    | 15            |
| 1507                          | 8  | 143     | 10.8      | 105      | 12.6    | 13.9       | 141   | 0.1             | 74    | 35    | 16            |
| 1508                          | 8  | 142     | 10.4      | 100      | 13.3    | 15.1       | 150   | 0.1             | 60    | 26    | 14            |
| 1509                          | 8  | 140     | 10.4      | 100      | 13.3    | 13.7       | 234   | 0.1             | 76    | 58    | 18            |
| 1510                          | 8  | 142     | 9.1       | 102      | 12.2    | 12.6       | 215   | 0.1             | 61    | 35    | 22            |
| 1511                          | 29 | 137     | 15.6      | 100      | 13.0    | 15.0       | 230   | 0.2             | 72    | 37    | 14            |
| 1512                          | 29 | 140     | 11.8      | 104      | 12.3    | 13.2       | 150   | 0.1             | 75    | 38    | 17            |
| 1513                          | 29 | 141     | 9.5       | 103      | 12.2    | 11.6       | 114   | 0.1             | 69    | 37    | 21            |
| 1514                          | 29 | 143     | 12.4      | 103      | 12.8    | 14.7       | 128   | 0.2             | 122   | 139   | 19            |
| 1515                          | 29 | 139     | 10.8      | 101      | 12.8    | 13.1       | 124   | 0.2             | 90    | 38    | 18            |



2759-001  
A Single Dose Toxicity Study of Test Article Administered by Intrathecal Injection in Rats

Individual Clinical Chemistry Values

Sex: Female

| Vehicle                       |    | Creatinine | Total Protein | Albumin | Globulin | Albumin/<br>Globulin | Triglyceride | Cholesterol | Glucose | Hemolytic Index |
|-------------------------------|----|------------|---------------|---------|----------|----------------------|--------------|-------------|---------|-----------------|
| Day(s) Relative to Start Date |    | (mg/dL)    | (g/dL)        | (g/dL)  | (g/dL)   |                      | (mg/dL)      | (mg/dL)     | (mg/dL) |                 |
| 1501                          | 91 | 0.6        | 7.2           | 3.8     | 3.4      | 1.1                  | 67           | 70          | 176     | 0               |
| 1502                          | 91 | 0.6        | 8.1           | 4.3     | 3.8      | 1.1                  | 62           | 80          | 116     | 0               |
| 1503                          | 91 | 0.6        | 8.0           | 4.2     | 3.8      | 1.1                  | 68           | 84          | 134     | 0               |
| 1504                          | 91 | 0.5        | 6.9           | 3.7     | 3.2      | 1.2                  | 58           | 69          | 208     | 0               |
| 1505                          | 91 | 0.6        | 7.5           | 4.0     | 3.5      | 1.1                  | 46           | 60          | 319     | 0               |
| 1506                          | 8  | 0.3        | 6.4           | 3.7     | 2.7      | 1.4                  | 61           | 65          | 236     | 0               |
| 1507                          | 8  | 0.4        | 6.4           | 3.6     | 2.8      | 1.3                  | 34           | 59          | 311     | 0               |
| 1508                          | 8  | 0.3        | 6.5           | 3.9     | 2.6      | 1.5                  | 46           | 71          | 237     | 0               |
| 1509                          | 8  | 0.5        | 6.4           | 3.5     | 2.9      | 1.2                  | 44           | 62          | 447     | 0               |
| 1510                          | 8  | 0.4        | 6.2           | 3.4     | 2.8      | 1.2                  | 41           | 80          | 281     | 0               |
| 1511                          | 29 | 0.7        | 7.3           | 3.9     | 3.4      | 1.1                  | 71           | 70          | 287     | 0               |
| 1512                          | 29 | 0.6        | 6.6           | 3.5     | 3.1      | 1.1                  | 70           | 77          | 241     | 0               |
| 1513                          | 29 | 0.5        | 7.0           | 3.6     | 3.4      | 1.1                  | 44           | 60          | 256     | 0               |
| 1514                          | 29 | 0.6        | 7.3           | 4.0     | 3.3      | 1.2                  | 54           | 60          | 115     | 0               |
| 1515                          | 29 | 0.5        | 7.6           | 4.1     | 3.5      | 1.2                  | 41           | 54          | 187     | 0               |



2759-001  
A Single Dose Toxicity Study of Test Article Administered by Intrathecal Injection in Rats

Individual Clinical Chemistry Values

Sex: Female

| Low Dose                      |    | Sodium  | Potassium | Chloride | Calcium | Phosphorus | ALP   | Total Bilirubin | AST   | ALT   | Urea Nitrogen |
|-------------------------------|----|---------|-----------|----------|---------|------------|-------|-----------------|-------|-------|---------------|
| Day(s) Relative to Start Date |    | (mEq/L) | (mEq/L)   | (mEq/L)  | (mg/dL) | (mg/dL)    | (U/L) | (mg/dL)         | (U/L) | (U/L) | (mg/dL)       |
| 2501                          | 91 | 141     | 12.0      | 100      | 13.8    | 16.4       | 55    | 0.2             | 88    | 38    | 12            |
| 2502                          | 91 | 140     | 12.0      | 100      | 13.2    | 15.7       | 38    | 0.2             | 90    | 38    | 15            |
| 2503                          | 91 | 139     | 13.2      | 97       | 12.4    | 13.6       | 33    | 0.2             | 168   | 79    | 23            |
| 2504                          | 91 | 140     | 11.2      | 101      | 12.6    | 11.5       | 57    | 0.2             | 293   | 81    | 15            |
| 2505                          | 91 | 139     | 10.2      | 96       | 13.4    | 10.6       | 38    | 0.2             | 135   | 52    | 15            |
| 2506                          | 8  | 141     | 10.4      | 102      | 13.2    | 13.0       | 153   | 0.1             | 64    | 33    | 19            |
| 2507                          | 8  | 138     | 11.8      | 100      | 12.9    | 12.9       | 182   | 0.1             | 95    | 56    | 25            |
| 2508                          | 8  | 139     | 12.2      | 103      | 13.1    | 16.7       | 177   | 0.1             | 87    | 58    | 18            |
| 2509                          | 8  | 141     | 9.0       | 99       | 13.8    | 13.2       | 191   | 0.1             | 71    | 38    | 15            |
| 2510                          | 8  | 138     | 13.0      | 101      | 12.9    | 15.2       | 162   | 0.1             | 93    | 27    | 13            |
| 2511                          | 29 | 134     | 18.2      | 99       | 12.5    | 17.6       | 84    | 0.2             | 280   | 87    | 17            |
| 2512                          | 29 | 143     | 8.8       | 100      | 12.9    | 11.3       | 122   | 0.2             | 67    | 43    | 14            |
| 2513                          | 29 | 136     | 15.2      | 102      | 13.4    | 17.4       | 72    | 0.2             | 108   | 35    | 15            |
| 2514                          | 29 | 143     | 9.4       | 100      | 12.6    | 11.7       | 130   | 0.1             | 75    | 32    | 15            |
| 2515                          | 29 | 139     | 11.8      | 100      | 13.2    | 15.4       | 101   | 0.2             | 83    | 36    | 16            |



2759-001  
A Single Dose Toxicity Study of Test Article Administered by Intrathecal Injection in Rats

Individual Clinical Chemistry Values

Sex: Female

| Low Dose |                                  | Creatinine<br>(mg/dL) | Total<br>Protein<br>(g/dL) | Albumin<br>(g/dL) | Globulin<br>(g/dL) | Albumin/<br>Globulin | Triglyceride<br>(mg/dL) | Cholesterol<br>(mg/dL) | Glucose<br>(mg/dL) | Hemolytic<br>Index |
|----------|----------------------------------|-----------------------|----------------------------|-------------------|--------------------|----------------------|-------------------------|------------------------|--------------------|--------------------|
|          | Day(s) Relative to<br>Start Date |                       |                            |                   |                    |                      |                         |                        |                    |                    |
| 2501     | 91                               | 0.5                   | 8.2                        | 4.6               | 3.6                | 1.3                  | 96                      | 80                     | 318                | 0                  |
| 2502     | 91                               | 0.5                   | 7.7                        | 4.3               | 3.4                | 1.3                  | 67                      | 78                     | 210                | 0                  |
| 2503     | 91                               | 0.6                   | 7.9                        | 4.3               | 3.6                | 1.2                  | 66                      | 74                     | 96                 | 0                  |
| 2504     | 91                               | 0.6                   | 7.7                        | 4.1               | 3.6                | 1.1                  | 49                      | 64                     | 247                | 0                  |
| 2505     | 91                               | 0.7                   | 9.3                        | 4.9               | 4.4                | 1.1                  | 55                      | 112                    | 349                | 0                  |
| 2506     | 8                                | 0.4                   | 6.3                        | 3.7               | 2.6                | 1.4                  | 61                      | 72                     | 445                | 0                  |
| 2507     | 8                                | 0.4                   | 6.5                        | 3.7               | 2.8                | 1.3                  | 63                      | 61                     | 470                | 0                  |
| 2508     | 8                                | 0.5                   | 7.1                        | 3.9               | 3.2                | 1.2                  | 53                      | 84                     | 135                | 0                  |
| 2509     | 8                                | 0.5                   | 7.4                        | 4.0               | 3.4                | 1.2                  | 61                      | 85                     | 413                | 0                  |
| 2510     | 8                                | 0.4                   | 6.7                        | 3.6               | 3.1                | 1.2                  | 52                      | 86                     | 244                | 0                  |
| 2511     | 29                               | 0.6                   | 8.2                        | 4.5               | 3.7                | 1.2                  | 59                      | 54                     | 84                 | 0                  |
| 2512     | 29                               | 0.5                   | 7.5                        | 3.9               | 3.6                | 1.1                  | 77                      | 110                    | 339                | 0                  |
| 2513     | 29                               | 0.4                   | 7.9                        | 4.2               | 3.7                | 1.1                  | 62                      | 80                     | 310                | 2                  |
| 2514     | 29                               | 0.5                   | 7.9                        | 4.2               | 3.7                | 1.1                  | 37                      | 88                     | 280                | 0                  |
| 2515     | 29                               | 0.6                   | 7.7                        | 4.1               | 3.6                | 1.1                  | 33                      | 51                     | 136                | 0                  |



2759-001  
A Single Dose Toxicity Study of Test Article Administered by Intrathecal Injection in Rats

Individual Clinical Chemistry Values

Sex: Female

| Mid Dose                      |    | Sodium  | Potassium | Chloride | Calcium | Phosphorus | ALP   | Total Bilirubin | AST   | ALT   | Urea Nitrogen |
|-------------------------------|----|---------|-----------|----------|---------|------------|-------|-----------------|-------|-------|---------------|
| Day(s) Relative to Start Date |    | (mEq/L) | (mEq/L)   | (mEq/L)  | (mg/dL) | (mg/dL)    | (U/L) | (mg/dL)         | (U/L) | (U/L) | (mg/dL)       |
| 3501                          | 91 | 143     | 12.4      | 103      | 13.3    | 16.5       | 30    | 0.2             | 113   | 63    | 18            |
| 3502                          | 91 | 141     | 11.0      | 101      | 14.0    | 11.4       | 33    | 0.2             | 80    | 48    | 15            |
| 3503                          | 91 | 139     | 14.4      | 102      | 12.5    | 12.2       | 60    | 0.1             | 57    | 31    | 15            |
| 3504                          | 91 | 144     | 10.0      | 101      | 13.2    | 12.0       | 65    | 0.2             | 73    | 29    | 14            |
| 3505                          | 91 | 141     | 14.8      | 101      | 12.7    | 11.2       | 53    | 0.2             | 67    | 27    | 15            |
| 3506                          | 8  | 138     | 9.6       | 101      | 13.1    | 14.3       | 249   | 0.1             | 77    | 38    | 23            |
| 3507                          | 8  | 140     | 11.2      | 103      | 12.5    | 14.0       | 198   | 0.1             | 76    | 34    | 16            |
| 3508                          | 8  | 141     | 10.8      | 103      | 11.8    | 13.3       | 167   | 0.1             | 76    | 51    | 13            |
| 3509                          | 8  | 142     | 9.8       | 101      | 12.4    | 13.8       | 163   | 0.1             | 70    | 59    | 18            |
| 3510                          | 8  | 139     | 10.6      | 103      | 12.4    | 14.6       | 154   | 0.1             | 79    | 63    | 14            |
| 3511                          | 29 | 136     | 15.4      | 101      | 12.3    | 12.9       | 130   | 0.2             | 95    | 40    | 19            |
| 3512                          | 29 | 142     | 10.6      | 101      | 13.7    | 15.2       | 92    | 0.2             | 74    | 32    | 14            |
| 3513                          | 29 | 137     | 12.0      | 100      | 13.0    | 12.5       | 150   | 0.2             | 74    | 37    | 14            |
| 3514                          | 29 | 141     | 11.0      | 102      | 13.8    | 13.0       | 105   | 0.1             | 71    | 24    | 17            |
| 3515                          | 29 | 138     | 13.8      | 99       | 12.8    | 14.0       | 141   | 0.1             | 69    | 21    | 10            |





2759-001  
A Single Dose Toxicity Study of Test Article Administered by Intrathecal Injection in Rats

Individual Clinical Chemistry Values

Sex: Female

| Mid Dose                      |    | Creatinine | Total Protein | Albumin | Globulin | Albumin/<br>Globulin | Triglyceride | Cholesterol | Glucose | Hemolytic Index |
|-------------------------------|----|------------|---------------|---------|----------|----------------------|--------------|-------------|---------|-----------------|
| Day(s) Relative to Start Date |    | (mg/dL)    | (g/dL)        | (g/dL)  | (g/dL)   |                      | (mg/dL)      | (mg/dL)     | (mg/dL) |                 |
| 3501                          | 91 | 0.5        | 7.5           | 4.1     | 3.4      | 1.2                  | 66           | 73          | 137     | 0               |
| 3502                          | 91 | 0.6        | 9.1           | 5.0     | 4.1      | 1.2                  | 66           | 107         | 291     | 0               |
| 3503                          | 91 | 0.5        | 6.6           | 3.5     | 3.1      | 1.1                  | 66           | 75          | 236     | 0               |
| 3504                          | 91 | 0.5        | 7.7           | 4.0     | 3.7      | 1.1                  | 50           | 96          | 270     | 0               |
| 3505                          | 91 | 0.6        | 8.2           | 4.2     | 4.0      | 1.1                  | 52           | 54          | 196     | 0               |
| 3506                          | 8  | 0.4        | 6.3           | 3.6     | 2.7      | 1.3                  | 43           | 68          | 394     | 0               |
| 3507                          | 8  | 0.3        | 6.4           | 3.8     | 2.6      | 1.5                  | 47           | 49          | 157     | 0               |
| 3508                          | 8  | 0.3        | 6.5           | 3.6     | 2.9      | 1.2                  | 52           | 59          | 175     | 0               |
| 3509                          | 8  | 0.3        | 6.6           | 3.5     | 3.1      | 1.1                  | 57           | 95          | 316     | 0               |
| 3510                          | 8  | 0.3        | 6.4           | 3.4     | 3.0      | 1.1                  | 50           | 84          | 144     | 0               |
| 3511                          | 29 | 0.5        | 7.4           | 4.0     | 3.4      | 1.2                  | 68           | 53          | 113     | 0               |
| 3512                          | 29 | 0.6        | 8.0           | 4.3     | 3.7      | 1.2                  | 60           | 102         | 250     | 0               |
| 3513                          | 29 | 0.5        | 8.1           | 4.2     | 3.9      | 1.1                  | 42           | 77          | 164     | 0               |
| 3514                          | 29 | 0.7        | 8.1           | 4.4     | 3.7      | 1.2                  | 48           | 59          | 296     | 0               |
| 3515                          | 29 | 0.6        | 7.5           | 3.9     | 3.6      | 1.1                  | 72           | 49          | 228     | 0               |



2759-001  
A Single Dose Toxicity Study of Test Article Administered by Intrathecal Injection in Rats

Individual Clinical Chemistry Values

Sex: Female

| High Dose                     |    | Sodium  | Potassium | Chloride | Calcium | Phosphorus | ALP   | Total Bilirubin | AST   | ALT   | Urea Nitrogen |
|-------------------------------|----|---------|-----------|----------|---------|------------|-------|-----------------|-------|-------|---------------|
| Day(s) Relative to Start Date |    | (mEq/L) | (mEq/L)   | (mEq/L)  | (mg/dL) | (mg/dL)    | (U/L) | (mg/dL)         | (U/L) | (U/L) | (mg/dL)       |
| 4501                          | 91 | 140     | 11.8      | 99       | 13.7    | 15.0       | 47    | 0.1             | 71    | 45    | 18            |
| 4502                          | 91 | 136     | 18.8      | 104      | 13.6    | 15.5       | 35    | 0.2             | 93    | 60    | 17            |
| 4503                          | 91 | 141     | 8.5       | 99       | 13.9    | 10.1       | 41    | 0.2             | 77    | 39    | 16            |
| 4504                          | 91 | 140     | 9.1       | 99       | 12.9    | 9.5        | 39    | 0.1             | 117   | 48    | 15            |
| 4505                          | 91 | 138     | 12.2      | 99       | 12.5    | 11.2       | 28    | 0.2             | 160   | 56    | 14            |
| 4506                          | 8  | 140     | 11.8      | 102      | 13.5    | 15.1       | 194   | 0.1             | 80    | 29    | 16            |
| 4507                          | 8  | 141     | 10.8      | 101      | 11.7    | 12.4       | 156   | 0.1             | 59    | 21    | 18            |
| 4508                          | 8  | 137     | 12.0      | 100      | 14.0    | 13.7       | 164   | 0.1             | 74    | 46    | 15            |
| 4509                          | 8  | 140     | 11.0      | 102      | 12.6    | 14.8       | 141   | 0.1             | 68    | 64    | 15            |
| 4510                          | 8  | 140     | 12.0      | 102      | 12.7    | 15.4       | 189   | 0.2             | 72    | 33    | 13            |
| 4511                          | 29 | 138     | 12.2      | 101      | 13.5    | 13.2       | 115   | 0.2             | 70    | 29    | 17            |
| 4512                          | 29 | 132     | 16.0      | 99       | 12.2    | 12.7       | 88    | 0.2             | 103   | 35    | 17            |
| 4513                          | 29 | 136     | 13.6      | 103      | 12.4    | 13.4       | 94    | 0.2             | 68    | 23    | 19            |
| 4514                          | 29 | 140     | 14.6      | 105      | 12.7    | 13.8       | 89    | 0.2             | 76    | 30    | 15            |
| 4515                          | 29 | 138     | 11.8      | 103      | 12.4    | 11.8       | 72    | 0.2             | 61    | 26    | 16            |

|  |
|--|
|  |
|--|

2759-001  
A Single Dose Toxicity Study of Test Article Administered by Intrathecal Injection in Rats

Individual Clinical Chemistry Values

Sex: Female

| High Dose                        |    | Creatinine<br>(mg/dL) | Total Protein<br>(g/dL) | Albumin<br>(g/dL) | Globulin<br>(g/dL) | Albumin/<br>Globulin | Triglyceride<br>(mg/dL) | Cholesterol<br>(mg/dL) | Glucose<br>(mg/dL) | Hemolytic<br>Index |
|----------------------------------|----|-----------------------|-------------------------|-------------------|--------------------|----------------------|-------------------------|------------------------|--------------------|--------------------|
| Day(s) Relative to<br>Start Date |    |                       |                         |                   |                    |                      |                         |                        |                    |                    |
| 4501                             | 91 | 0.5                   | 8.6                     | 4.7               | 3.9                | 1.2                  | 158                     | 49                     | 227                | 0                  |
| 4502                             | 91 | 0.6                   | 7.8                     | 4.2               | 3.6                | 1.2                  | 97                      | 77                     | 174                | 0                  |
| 4503                             | 91 | 0.6                   | 8.9                     | 4.8               | 4.1                | 1.2                  | 70                      | 115                    | 308                | 0                  |
| 4504                             | 91 | 0.5                   | 7.4                     | 3.9               | 3.5                | 1.1                  | 91                      | 77                     | 360                | 0                  |
| 4505                             | 91 | 0.6                   | 7.9                     | 3.9               | 4.0                | 1.0                  | 50                      | 74                     | 160                | 0                  |
| 4506                             | 8  | 0.4                   | 6.8                     | 3.9               | 2.9                | 1.3                  | 50                      | 76                     | 248                | 0                  |
| 4507                             | 8  | 0.3                   | 6.2                     | 3.7               | 2.5                | 1.5                  | 37                      | 56                     | 165                | 0                  |
| 4508                             | 8  | 0.5                   | 7.1                     | 3.8               | 3.3                | 1.2                  | 75                      | 74                     | 481                | 0                  |
| 4509                             | 8  | 0.4                   | 6.8                     | 3.6               | 3.2                | 1.1                  | 34                      | 113                    | 78                 | 0                  |
| 4510                             | 8  | 0.4                   | 7.2                     | 3.9               | 3.3                | 1.2                  | 37                      | 63                     | 85                 | 0                  |
| 4511                             | 29 | 0.6                   | 7.8                     | 4.0               | 3.8                | 1.1                  | 58                      | 81                     | 306                | 0                  |
| 4512                             | 29 | 0.5                   | 8.1                     | 4.2               | 3.9                | 1.1                  | 54                      | 50                     | 114                | 0                  |
| 4513                             | 29 | 0.5                   | 7.7                     | 4.0               | 3.7                | 1.1                  | 46                      | 54                     | 128                | 0                  |
| 4514                             | 29 | 0.5                   | 7.4                     | 3.8               | 3.6                | 1.1                  | 47                      | 69                     | 188                | 1                  |
| 4515                             | 29 | 0.5                   | 7.2                     | 4.0               | 3.2                | 1.3                  | 66                      | 69                     | 171                | 0                  |



Appendix 10  
Pathology Report

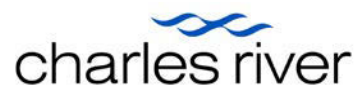

**FINAL REPORT**

**Study Phase: Pathology**

**Test Site Reference No. 20181811**

**Testing Facility Study No. 2759-001**

**Sponsor Reference No. CLN7-001**

**TEST SITE:**

Charles River Laboratories, Inc.  
4025 Stirrup Creek Drive, Suite 150  
Durham, NC 27703  
United States

**TESTING FACILITY:**

Charles River Laboratories, Inc.  
54943 North Main Street  
Mattawan, MI 49071  
United States

**TABLE OF CONTENTS**

LIST OF TABLES .....3

LIST OF APPENDICES .....3

QUALITY ASSURANCE STATEMENT .....4

COMPLIANCE STATEMENT AND REPORT APPROVAL.....5

1. SUMMARY .....6

2. RESPONSIBLE PERSONNEL.....6

3. INTRODUCTION .....7

4. MATERIALS AND METHODS .....7

4.1. Computerized Systems.....8

4.2. Disposition of Study Materials .....8

5. RESULTS AND DISCUSSIONS .....8

5.1. Mortality .....8

5.2. Gross (Macroscopic) Pathology.....8

5.2.1. Terminal Euthanasia Animals (Day 8) .....8

5.2.2. Terminal Euthanasia Animals (Day 29) .....8

5.2.3. Terminal Euthanasia Animals (Day 91) .....8

5.3. Organ Weights .....9

5.3.1. Terminal Euthanasia Animals (Day 8) .....9

5.3.2. Terminal Euthanasia Animals (Day 29) .....9

5.3.3. Terminal Euthanasia Animals (Day 91) .....9

5.4. Histopathology.....10

5.4.1. Terminal Euthanasia (Day 8) .....10

5.4.2. Terminal Euthanasia (Day 29) .....12

5.4.3. Terminal Euthanasia (Day 91) .....12

6. CONCLUSIONS .....13

7. REFERENCES .....14

**LIST OF TABLES**

|         |                                                          |    |
|---------|----------------------------------------------------------|----|
| Table 1 | Summary of Macroscopic Pathology Findings (Day 8) .....  | 15 |
| Table 2 | Summary of Macroscopic Pathology Findings (Day 29) ..... | 17 |
| Table 3 | Summary of Macroscopic Pathology Findings (Day 91) ..... | 20 |
| Table 4 | Summary of Organ Weight Values (Day 8) .....             | 23 |
| Table 5 | Summary of Organ Weight Values (Day 29) .....            | 36 |
| Table 6 | Summary of Organ Weight Values (Day 91) .....            | 49 |
| Table 7 | Summary of Microscopic Pathology Findings (Day 8) .....  | 62 |
| Table 8 | Summary of Microscopic Pathology Findings (Day 29) ..... | 71 |
| Table 9 | Summary of Microscopic Pathology Findings (Day 91) ..... | 79 |

**LIST OF APPENDICES**

|            |                                                                                      |     |
|------------|--------------------------------------------------------------------------------------|-----|
| Appendix 1 | Deviations .....                                                                     | 86  |
| Appendix 2 | Individual Organ Weight Values (Day 8) .....                                         | 88  |
| Appendix 3 | Individual Organ Weight Values (Day 29) .....                                        | 137 |
| Appendix 4 | Individual Organ Weight Values (Day 91) .....                                        | 186 |
| Appendix 5 | Individual Animal Data Macroscopic and Microscopic Pathology Findings (Day 8) .....  | 235 |
| Appendix 6 | Individual Animal Data Macroscopic and Microscopic Pathology Findings (Day 29) ..... | 276 |
| Appendix 7 | Individual Animal Data Macroscopic and Microscopic Pathology Findings (Day 91) ..... | 317 |

### QUALITY ASSURANCE STATEMENT

Study Number: 2759-001

This phase has been audited by Quality Assurance in accordance with the applicable Good Laboratory Practice regulations. Reports were submitted in accordance with standard operating procedures as follows:

#### QA INSPECTION DATES

| Date(s) of Audit          | Phase(s) Audited               | Dates Findings Submitted to: |                                   |                |                           |
|---------------------------|--------------------------------|------------------------------|-----------------------------------|----------------|---------------------------|
|                           |                                | Principal Investigator       | Principal Investigator Management | Study Director | Study Director Management |
| 08-Mar-2019 - 09-Mar-2019 | Phase Report - Pathology       | 11-Mar-2019                  | 11-Mar-2019                       | 11-Mar-2019    | 11-Mar-2019               |
| 28-May-2019               | Phase Report - Pathology       | 28-May-2019                  | 28-May-2019                       | 28-May-2019    | 28-May-2019               |
| 02-Mar-2020               | Final Phase Report - Pathology | 02-Mar-2020                  | 02-Mar-2020                       | 02-Mar-2020    | 02-Mar-2020               |

Process-based inspections relevant to this study were conducted according to a predetermined schedule. The outcome of each inspection was reported to Management and, where relevant for processes seen as part of a study, the Study Director.

Facilities relevant to this study are included in Charles River's annual facility inspection programme. The outcome of each inspection is reported to Management.

DocuSigned by:  
*Enosha Simmons*

 Signer Name: Enosha Simmons  
Signing Reason: I approve this document  
Signing Time: 05-Mar-2020 | 13:30:36 EST

4CCF1BF93FB74CD4B33DC7AD5C1B296E

Enosha Simmons  
Quality Assurance Auditor



## COMPLIANCE STATEMENT AND REPORT APPROVAL

The pathology phase of this study conducted in the USA was performed in accordance with the U.S. Department of Health and Human Services, Food and Drug Administration, United States Code of Federal Regulations, Title 21, Part 58: Good Laboratory Practice for Nonclinical Laboratory Studies and as accepted by Regulatory Authorities throughout the European Union (OECD Principles of Good Laboratory Practice), Japan (MHLW), and other countries that are signatories to the OECD Mutual Acceptance of Data Agreement.

This phase of the study was conducted in accordance with the procedures described herein. All deviations (if any) authorized/acknowledged by the Study Director are documented in the Study Records. The report represents an accurate and complete record of the results obtained for this study phase.

There were no deviations from the above regulations that affected the overall integrity of this study phase or the interpretation of the phase results and conclusions.

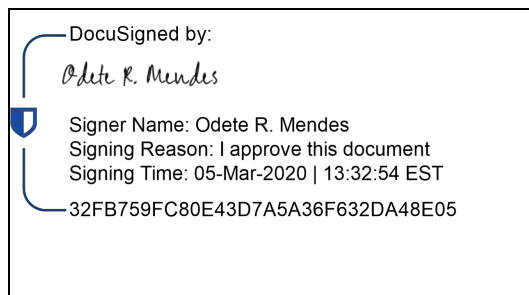

Odete R. Mendes, DVM, PhD, DACVP, DABT  
Principal Investigator, Anatomic Pathology

## 1. SUMMARY

The objective of this study was to further characterize the toxicity, biodistribution and gene expression of scAAV9/JeT-hCLN7opt-SV40pA.

The test article, scAAV9/JeT-hCLN7opt-SV40pA, or vehicle were administered by intrathecal injection (IT) to Sprague-Dawley rats once on Day 1 at doses of 0,  $5 \times 10^{11}$ ,  $2 \times 10^{12}$  or  $6 \times 10^{12}$  vg/animal with an observation period of up to 91 days. There were 4 groups of 5 animals/sex/group at all dose levels scheduled for euthanasia on Day 8, Day 29 or Day 91 of study. Necropsies were performed and organ weights were collected as were all tissues required for microscopic evaluation at all dose levels.

There were no main study unscheduled deaths. There were no test article related macroscopic (gross) observations. There were no toxicologically relevant organ weight changes observed on Days 8 and Day 29. On Day 91, increased thymus weights were observed in males in a dose dependent manner that were statistically significant at  $\geq 6 \times 10^{12}$  vg/animal. Increased thymus weights had no histopathological correlate and were considered to be of little toxicological significance.

On Day 8, splenic marginal zone depletion was observed in females at  $6 \times 10^{12}$  vg/animal. This transient finding was potentially secondary to stress associated with the test article administration procedure and therefore had limited toxicological relevance. Also limited to Day 8, were focal gliosis and perivascular infiltrates observed in the lumbar and/or the thoracic spinal cord in individual females treated at  $2 \times 10^{12}$  vg/animal. These were considered local reactivity to the administration procedure and were not considered to be directly attributable to test article.

Perivascular mononuclear infiltrates in the right and/or left lumbar ganglia were observed with a comparable incidence across treatment groups, and their incidence and severity decreased by Day 91. They are attributed to the administration procedure and not directly to a test article effect.

In conclusion, intrathecal administration of scAAV9/JeT-hCLN7opt-SV40pA once on Day 1 to rats at doses of 0,  $5 \times 10^{11}$ ,  $2 \times 10^{12}$  or  $6 \times 10^{12}$  vg/animal with an observation period of up to 91 days resulted in no unscheduled deaths. There were no test article related macroscopic findings. Increased thymus weights were significant in males at  $6 \times 10^{12}$  vg/animal however, without a histopathological correlate, they were considered to have little toxicological significance. There were no microscopic changes directly attributable to the administration of scAAV9/JeT-hCLN7opt-SV40pA.

## 2. RESPONSIBLE PERSONNEL

Principal Investigator,  
Anatomic Pathology

Odete R. Mendes, DVM, PhD, DACVP, DABT  
Charles River Laboratories, Inc.  
Durham, North Carolina

Test Site Management

Danielle L. Brown, DVM, MS, DACVP,  
DABT, FIATP  
Charles River Laboratories, Inc.  
Durham, North Carolina

### 3. INTRODUCTION

This report presents the pathology findings in Sprague Dawley rats assigned to Study No. 2759-001. The objective of this study was to further characterize the toxicity, biodistribution, and gene expression of the test article. The test article was being developed for treatment of the neurodegenerative Batten Disease (CLN7 subtype).

The study was sponsored by Foundation for Batten Hope, Dallas, TX. Sarah Davis, BS, LATG served as the Study Director.

### 4. MATERIALS AND METHODS

Experimental procedures applicable to pathology investigations are summarized in [Text Table 1](#). Deviations to the pathology procedures performed by the Test Site are listed in [Appendix 1](#).

Text Table 1  
Experimental Design

| Group | Treatment                      | Dose Level<br>(vg/animal) | Dose<br>Volume<br>( $\mu$ L) | Dose<br>Concentration<br>(vg/ $\mu$ L) | Number of Animals |   |                    |   |                    |   |
|-------|--------------------------------|---------------------------|------------------------------|----------------------------------------|-------------------|---|--------------------|---|--------------------|---|
|       |                                |                           |                              |                                        | Necropsy<br>Day 8 |   | Necropsy<br>Day 29 |   | Necropsy<br>Day 91 |   |
|       |                                |                           |                              |                                        | M                 | F | M                  | F | M                  | F |
| 1     | Vehicle                        | 0                         | 60 $\mu$ L                   | 0                                      | 5                 | 5 | 5                  | 5 | 5                  | 5 |
| 2     | Test Article<br>Low Dose       | $5 \times 10^{11}$        | 20 $\mu$ L                   | $2.5 \times 10^{10}$                   | 5                 | 5 | 5                  | 5 | 5                  | 5 |
| 3     | Test Article<br>Middle<br>Dose | $2 \times 10^{12}$        | 20 $\mu$ L                   | $1 \times 10^{11}$                     | 5                 | 5 | 5                  | 5 | 5                  | 5 |
| 4     | Test Article<br>High Dose      | $6 \times 10^{12}$        | 60 $\mu$ L                   | $1 \times 10^{11}$                     | 5                 | 5 | 5                  | 5 | 5                  | 5 |

All main study animals were submitted for necropsy on Day 8, Day 29 or Day 91 (Terminal Euthanasia). Necropsies were performed and organ weights were collected by Charles River Laboratories, Inc., Mattawan, MI personnel. Statistical analysis of organ weight data was performed by the Testing Facility. Tissues required for microscopic evaluation which included thymus added by amendment, were trimmed, processed routinely, embedded in paraffin, and stained with hematoxylin and eosin by Charles River Laboratories, Inc., Mattawan, MI. Microscopic evaluation was conducted by the Principal Investigator, a board-certified veterinary pathologist, on all protocol-specified tissues from all animals that were evaluated by light microscopy.

Tissues that were supposed to be microscopically evaluated per protocol but were not available on the slide (and therefore not evaluated) are listed in the Individual Animal Data of the pathology report as not present. These missing tissues did not affect the outcome or

interpretation of the pathology portion of the study because the number of tissues examined from each treatment group was sufficient for interpretation.

#### 4.1. Computerized Systems

Critical computerized systems used in the study by the Test Site are listed in [Text Table 2](#).

Text Table 2  
Computerized Systems

| System Name                      | Version No. | Description of Data Collected and/or Analyzed |
|----------------------------------|-------------|-----------------------------------------------|
| Provantis                        | 9           | Histopathology                                |
| Deviation Information Library    | 2.1         | Deviations (if any)                           |
| Share Document Management System | 1.0         | Reporting                                     |
| DocuSign                         | 19          | Collection of Part 11 compliant signature     |

#### 4.2. Disposition of Study Materials

All study-specific raw data, pathology materials, and documentation and Final Report generated from this study phase are to be sent to Charles River Laboratories, Inc., Mattawan, MI for archiving. Study materials will be retained for a period of 1 year following issue of the audited Draft Report. Electronic Provantis data generated by the Test Site will be archived, and the software and hardware required to produce it in a readable form will be maintained and available. The electronic Provantis data will be archived in MPI Research, Mattawan, MI. Report files stored on the SHARE Document Management System (SDMS) will be archived in Charles River Laboratories, Inc., Wilmington, MA.

### 5. RESULTS AND DISCUSSIONS

#### 5.1. Mortality

There were no main study unscheduled deaths during this study.

#### 5.2. Gross (Macroscopic) Pathology

##### 5.2.1. Terminal Euthanasia Animals (Day 8)

([Table 1](#) and [Appendix 5](#))

No gross (macroscopic) findings were noted for male or female animals at this interval.

##### 5.2.2. Terminal Euthanasia Animals (Day 29)

([Table 2](#) and [Appendix 6](#))

No test article-related gross findings were noted. The gross findings observed were considered incidental, of the nature commonly observed in this strain and age of rat and/or were of similar incidence in control and treated animals and, therefore, were considered unrelated to administration of scAAV9/JeT-hCLN7opt-SV40pA.

##### 5.2.3. Terminal Euthanasia Animals (Day 91)

([Table 3](#) and [Appendix 7](#))

No test article-related gross findings were noted. The gross findings observed were considered incidental, of the nature commonly observed in this strain and age of rat and/or were of similar incidence in control and treated animals and, therefore, were considered unrelated to administration of scAAV9/JeT-hCLN7opt-SV40pA.

### 5.3. Organ Weights

#### 5.3.1. Terminal Euthanasia Animals (Day 8)

(Table 4 and Appendix 2)

No test article-related organ weight changes were noted. There were isolated organ weight values that were different from their respective controls. There were, however, no patterns, trends, or correlating data to suggest these values were toxicologically relevant. Thus, the organ weight differences observed were considered incidental and unrelated to administration of scAAV9/JeT-hCLN7opt-SV40pA.

#### 5.3.2. Terminal Euthanasia Animals (Day 29)

(Table 5 and Appendix 3)

Potential test article-related organ weight changes were noted at the end of Day 29 and are summarized in Text Table 3.

Text Table 3  
Summary of Organ Weight Data – Terminal Euthanasia (Day 29)

| Group<br>Dose (vg/day)<br>No. Animals per Group | Males                   |                         |                         |
|-------------------------------------------------|-------------------------|-------------------------|-------------------------|
|                                                 | 2<br>5x10 <sup>11</sup> | 3<br>2x10 <sup>12</sup> | 4<br>6x10 <sup>12</sup> |
| <b>Thyroid (No. Weighed)<sup>a</sup></b>        | <b>5</b>                | <b>5</b>                | <b>5</b>                |
| Absolute value                                  | -11.7                   | <b>-22.5</b>            | <b>-22.3</b>            |
| % of body weight                                | -12.7                   | <b>-20.0</b>            | <b>-23.1</b>            |
| % of brain weight                               | -11.3                   | <b>-21.7</b>            | <b>-23.4</b>            |

<sup>a</sup> All values expressed as percent difference of control group means. Based upon statistical analysis of group means, values highlighted in bold are significantly different from control group – P ≤ 0.01; refer to data tables for actual significance levels and tests used.

Decreased thyroid weights in male animals were statistically significant at  $\geq 2 \times 10^{12}$  vg/animal. As per protocol, the thyroid gland was not evaluated microscopically.

No other test article-related organ weight changes were noted. There were other isolated organ weight values that were statistically different from their respective controls. There were, however, no patterns, trends, or correlating data to suggest these values were toxicologically relevant. Thus, other organ weight differences observed were considered incidental and unrelated to administration of scAAV9/JeT-hCLN7opt-SV40pA.

#### 5.3.3. Terminal Euthanasia Animals (Day 91)

(Table 6 and Appendix 4)

Potential test article-related organ weight changes noted at the Day 91 terminal euthanasia and potential test article-related organ weight changes noted at the Day 29 terminal euthanasia that were not observed at the end of Day 91 are summarized in [Text Table 4](#).

Text Table 4  
Summary of Organ Weight Data – Terminal Euthanasia (Day 91)

| Group<br>Dose (vg/animal)<br>No. Animals per Group | Males                   |                         |                         |
|----------------------------------------------------|-------------------------|-------------------------|-------------------------|
|                                                    | 2<br>5x10 <sup>11</sup> | 3<br>2x10 <sup>12</sup> | 4<br>6x10 <sup>12</sup> |
| <b>Thymus (No. Weighed)<sup>a</sup></b>            | <b>5</b>                | <b>5</b>                | <b>5</b>                |
| Absolute value                                     | 13.0                    | 46.9                    | <b>64.6</b>             |
| % of body weight                                   | 14.6                    | 36.2                    | <b>56.0</b>             |
| % of brain weight                                  | 16.2                    | 52.7                    | <b>70.1</b>             |
| <b>Thyroid (No. Weighed)</b>                       | <b>5</b>                | <b>5</b>                | <b>5</b>                |
| Absolute value                                     | -7.5                    | 15.6                    | 8.1                     |
| % of body weight                                   | -6.9                    | 6.8                     | 9.4                     |
| % of brain weight                                  | -6.0                    | 19.2                    | 10.4                    |

<sup>a</sup> All values expressed as percent difference of control group means.

Based upon statistical analysis of group means, values highlighted in bold are significantly different from control group – P ≤ 0.05; refer to data tables for actual significance levels and tests used.

Increased thymus weights were observed in males in a dose dependent manner and became statistically significant at the highest dose. Increased thymus weights had no histopathological correlate and were considered to be of little toxicological significance.

Potential dose dependent decreases in thyroid weight that were observed in males on Day 29 were not observed on Day 91 and actual increases in thyroid weights were observed at 6x10<sup>12</sup> vg/animal. These data, together with the small magnitude and transiency of the changes observed, support an unlikely relationship to treatment and no toxicological significance.

A statistical significant increase was observed for the absolute spleen of females treated at 6x10<sup>12</sup> vg/animal. Spleen weight increases were of small magnitude, were not in a dose dependent manner and did not have a relevant correlating microscopic effect and were thus considered within expected biological variability for this organ and not related to test article administration.

No other test article-related organ weight changes were noted. There were other isolated organ weight values that were statistically different from their respective controls. There were, however, no patterns, trends, or correlating data to suggest these values were toxicologically relevant. Thus, other organ weight differences observed were considered incidental and unrelated to administration of scAAV9/JeT-hCLN7opt-SV40pA.

## 5.4. Histopathology

### 5.4.1. Terminal Euthanasia (Day 8)

([Table 7](#) and [Appendix 5](#))

Microscopic findings are summarized in [Text Table 5](#).

Text Table 5  
Summary of Microscopic Findings – Terminal Euthanasia (Day 8)

|                                                         | Males            |     |                    |                    | Females            |     |                    |                    |                    |
|---------------------------------------------------------|------------------|-----|--------------------|--------------------|--------------------|-----|--------------------|--------------------|--------------------|
|                                                         | Group            | 1   | 2                  | 3                  | 4                  | 1   | 2                  | 3                  | 4                  |
|                                                         | Dose (vg/animal) | 0   | 5x10 <sup>11</sup> | 2x10 <sup>12</sup> | 6x10 <sup>12</sup> | 0   | 5x10 <sup>11</sup> | 2x10 <sup>12</sup> | 6x10 <sup>12</sup> |
| No. Animals Examined                                    | 5                | 5   | 5                  | 5                  | 5                  | 5   | 5                  | 5                  |                    |
| <b>Dorsal Root Ganglia, Lumbar right (No. Examined)</b> | (5)              | (5) | (5)                | (5)                | (5)                | (5) | (5)                | (5)                |                    |
| Infiltration, mononuclear perivascular                  |                  |     |                    |                    |                    |     |                    |                    |                    |
| Minimal                                                 | 0                | 0   | 1                  | 1                  | 1                  | 1   | 1                  | 0                  |                    |
| <b>Dorsal Root Ganglia, Lumbar left (No. Examined)</b>  | (5)              | (5) | (5)                | (5)                | (4)                | (5) | (5)                | (5)                |                    |
| Infiltration, mononuclear perivascular                  |                  |     |                    |                    |                    |     |                    |                    |                    |
| Minimal                                                 | 1                | 1   | 0                  | 1                  | 0                  | 1   | 0                  | 1                  |                    |
| <b>Spleen (No. Examined)</b>                            | (5)              | (5) | (5)                | (5)                | (5)                | (5) | (5)                | (5)                |                    |
| Depletion, marginal zone                                |                  |     |                    |                    |                    |     |                    |                    |                    |
| Minimal                                                 | 0                | 0   | 0                  | 0                  | 0                  | 0   | 0                  | 3                  |                    |
| Mild                                                    | 0                | 0   | 0                  | 0                  | 0                  | 0   | 0                  | 1                  |                    |
| Marked                                                  | 0                | 0   | 0                  | 0                  | 0                  | 0   | 0                  | 1                  |                    |
| <b>Spinal Cord, Lumbar (No. Examined)</b>               | (5)              | (5) | (5)                | (5)                | (5)                | (5) | (5)                | (5)                |                    |
| Gliosis                                                 |                  |     |                    |                    |                    |     |                    |                    |                    |
| Minimal                                                 | 0                | 0   | 0                  | 0                  | 0                  | 0   | 2                  | 0                  |                    |
| Infiltration, mononuclear perivascular                  |                  |     |                    |                    |                    |     |                    |                    |                    |
| Minimal                                                 | 0                | 0   | 0                  | 0                  | 0                  | 0   | 2                  | 0                  |                    |
| <b>Spinal Cord, Thoracic (No. Examined)</b>             | (5)              | (5) | (5)                | (5)                | (5)                | (5) | (5)                | (5)                |                    |
| Gliosis                                                 |                  |     |                    |                    |                    |     |                    |                    |                    |
| Minimal                                                 | 0                | 0   | 0                  | 0                  | 0                  | 0   | 1                  | 0                  |                    |
| Infiltration, mononuclear perivascular                  |                  |     |                    |                    |                    |     |                    |                    |                    |
| Minimal                                                 | 0                | 0   | 0                  | 0                  | 0                  | 0   | 1                  | 0                  |                    |

Minimal to marked depletion of the splenic marginal zone was observed in females treated at 6x10<sup>12</sup> vg/animal. Decrease in B lymphocytes (main component) of the marginal zone have been associated with stress related response in rodent preclinical studies.<sup>1</sup> Additionally, this finding was not observed at latter time points and was interpreted likely a transient secondary effect to test article administration and therefore of limited toxicological relevance.

Minimal perivascular mononuclear infiltrates in the right and/or left lumbar ganglia were observed with a comparable incidence across treatment groups, these were attributed to the administration procedure and not directly to test article administration.

Likewise, focal minimal gliosis and minimal perivascular infiltrates were observed in the lumbar and/or the thoracic spinal cord in individual females treated at 2x10<sup>12</sup> vg/animal. These were secondary reactivity to the administration procedure and were not considered to be directly attributable to a test article effect.

Other microscopic findings observed were considered incidental, of the nature commonly observed in this strain and age of rat, and/or were of similar incidence and severity in control and

treated animals and, therefore, were considered unrelated to administration of scAAV9/JeT-hCLN7opt-SV40pA.

#### 5.4.2. Terminal Euthanasia (Day 29)

(Table 8 and Appendix 6)

Microscopic findings noted at the end of Day 29 and are summarized in Text Table 6.

Text Table 6  
Summary of Microscopic Findings – Terminal Euthanasia (Day 29)

| Group<br>Dose (vg/animal)<br>No. Animals Examined           | Males       |                              |                              |                              | Females     |                              |                              |                              |
|-------------------------------------------------------------|-------------|------------------------------|------------------------------|------------------------------|-------------|------------------------------|------------------------------|------------------------------|
|                                                             | 1<br>0<br>5 | 2<br>5x10 <sup>11</sup><br>5 | 3<br>2x10 <sup>12</sup><br>5 | 4<br>6x10 <sup>12</sup><br>5 | 1<br>0<br>5 | 2<br>5x10 <sup>11</sup><br>5 | 3<br>2x10 <sup>12</sup><br>5 | 4<br>6x10 <sup>12</sup><br>5 |
| <b>Dorsal Root Ganglia, Lumbar right<br/>(No. Examined)</b> | (5)         | (5)                          | (5)                          | (5)                          | (5)         | (5)                          | (5)                          | (5)                          |
| Infiltration, mononuclear perivascular                      |             |                              |                              |                              |             |                              |                              |                              |
| Minimal                                                     | 0           | 1                            | 1                            | 2                            | 1           | 1                            | 0                            | 1                            |
| Mild                                                        | 0           | 1                            | 0                            | 0                            | 0           | 0                            | 0                            | 0                            |
| <b>Dorsal Root Ganglia, Lumbar left (No.<br/>Examined)</b>  | (5)         | (5)                          | (5)                          | (5)                          | (5)         | (5)                          | (5)                          | (5)                          |
| Infiltration, mononuclear perivascular                      |             |                              |                              |                              |             |                              |                              |                              |
| Minimal                                                     | 0           | 1                            | 1                            | 1                            | 0           | 1                            | 2                            | 2                            |

Minimal perivascular mononuclear infiltrates in the right and/or left lumbar ganglia were observed with an overall comparable incidence across treatment groups and were attributed to the administration procedure and not directly to test article administration. In the groups administered the test article, there was a potential very slight trend, that had no clear dose response, for increased finding incidence and severity that could possibly be attributable to reactivity to the presence of the test article.

Other microscopic findings observed were considered incidental, of the nature commonly observed in this strain and age of rat, and/or were of similar incidence and severity in control and treated animals and, therefore, were considered unrelated to administration of scAAV9/JeT-hCLN7opt-SV40pA.

#### 5.4.3. Terminal Euthanasia (Day 91)

(Table 9 and Appendix 7)

Microscopic findings noted at the end of Day 91 and are summarized in Text Table 7.



Text Table 7  
Summary of Microscopic Findings – Terminal Euthanasia (Day 91)

| Group<br>Dose (vg/animal)<br>No. Animals Examined           | Males |                    |                    |                    | Females |                    |                    |                    |
|-------------------------------------------------------------|-------|--------------------|--------------------|--------------------|---------|--------------------|--------------------|--------------------|
|                                                             | 1     | 2                  | 3                  | 4                  | 1       | 2                  | 3                  | 4                  |
|                                                             | 0     | 5x10 <sup>11</sup> | 2x10 <sup>12</sup> | 6x10 <sup>12</sup> | 0       | 5x10 <sup>11</sup> | 2x10 <sup>12</sup> | 6x10 <sup>12</sup> |
| <b>Dorsal Root Ganglia, Lumbar right<br/>(No. Examined)</b> | (5)   | (5)                | (5)                | (5)                | (5)     | (5)                | (5)                | (5)                |
| Infiltration, mononuclear perivascular<br>Minimal           | 0     | 0                  | 0                  | 0                  | 0       | 0                  | 3                  | 0                  |
| <b>Dorsal Root Ganglia, Lumbar left<br/>(No. Examined)</b>  | (5)   | (5)                | (5)                | (5)                | (5)     | (5)                | (5)                | (5)                |
| Infiltration, mononuclear perivascular<br>Minimal           | 0     | 1                  | 0                  | 0                  | 1       | 0                  | 2                  | 0                  |

Minimal perivascular mononuclear infiltrates in the right and/or left lumbar ganglia were observed with an overall comparable incidence across treatment groups, that decreased in severity and incidence by Day 91. These were attributed to the administration procedure and not directly to test article administration.

Other microscopic findings observed were considered incidental, of the nature commonly observed in this strain and age of rat, and/or were of similar incidence and severity in control and treated animals and, therefore, were considered unrelated to administration of scAAV9/JeT-hCLN7opt-SV40pA.

## 6. CONCLUSIONS

Intrathecal administration of scAAV9/JeT-hCLN7opt-SV40pA once on Day 1 to rats at doses of 0, 5x10<sup>11</sup>, 2x10<sup>12</sup> or 6x10<sup>12</sup> vg/animal with an observation period of up to 91 days resulted in no unscheduled deaths. There were no test article related macroscopic findings. Increased thymus weights were significant in males at 6x10<sup>12</sup> vg/animal however, without a histopathological correlate, they were considered to have little toxicological significance. There were no microscopic changes directly attributable to the administration of scAAV9/JeT-hCLN7opt-SV40pA.

**7. REFERENCES**

- 1 Everds NE, Snyder PW, Bailey KL, Bolon B, Creasy DM, Foley GL, Rosol TJ, Sellers T.,  
Interpreting stress responses during routine toxicity studies: a review of the biology, impact,  
and assessment., *Toxicol Pathol.* 2013;41(4):560-614.

**Table 1**  
**Summary of Macroscopic Pathology Findings (Day 8)**

2759-001  
A Single Dose Toxicity Study of Test Article Administered by Intrathecal Injection in Rats  
Summary of Macroscopic Observations

**No Data Found**

**Table 2**  
**Summary of Macroscopic Pathology Findings (Day 29)**

2759-001  
 A Single Dose Toxicity Study of Test Article Administered by Intrathecal Injection in Rats

Summary of Macroscopic Observations

| Sex: Male<br><br>Number of Animals: | Vehicle | Low Dose | Mid Dose | High Dose |
|-------------------------------------|---------|----------|----------|-----------|
|                                     | SS      | SS       | SS       | SS        |
|                                     | 5       | 5        | 5        | 5         |
| <b>liver</b>                        |         |          |          |           |
| Submitted                           | 5       | 5        | 5        | 5         |
| focus/foci, red                     | 1       | -        | -        | -         |
| <b>skin</b>                         |         |          |          |           |
| Submitted                           | 5       | 5        | 5        | 5         |
| abrasion/scab                       | -       | -        | -        | 1         |

2759-001  
 A Single Dose Toxicity Study of Test Article Administered by Intrathecal Injection in Rats

Summary of Macroscopic Observations

| Sex: Female<br><br>Number of Animals: | Vehicle | Low Dose | Mid Dose | High Dose |
|---------------------------------------|---------|----------|----------|-----------|
|                                       | SS      | SS       | SS       | SS        |
|                                       | 5       | 5        | 5        | 5         |
| <b>liver</b><br>Submitted             | 5       | 5        | 5        | 5         |
| <b>skin</b><br>Submitted              | 5       | 5        | 5        | 5         |

**Table 3**  
**Summary of Macroscopic Pathology Findings (Day 91)**



2759-001  
 A Single Dose Toxicity Study of Test Article Administered by Intrathecal Injection in Rats

Summary of Macroscopic Observations

| Sex: Male<br><br>Number of Animals: | Vehicle | Low Dose | Mid Dose | High Dose |
|-------------------------------------|---------|----------|----------|-----------|
|                                     | SS      | SS       | SS       | SS        |
|                                     | 5       | 5        | 5        | 5         |
| <b>kidneys</b>                      |         |          |          |           |
| Submitted                           | 5       | 5        | 5        | 5         |
| irregular surface                   | 1       | -        | -        | -         |
| .... approximately 50% affected     | 1       | -        | -        | -         |

2759-001  
 A Single Dose Toxicity Study of Test Article Administered by Intrathecal Injection in Rats

Summary of Macroscopic Observations

| Sex: Female                 | Vehicle | Low Dose | Mid Dose | High Dose |
|-----------------------------|---------|----------|----------|-----------|
| Number of Animals:          | SS      | SS       | SS       | SS        |
| <b>kidneys</b><br>Submitted | 5       | 5        | 5        | 5         |

**Table 4**  
**Summary of Organ Weight Values (Day 8)**

2759-001  
A Single Dose Toxicity Study of Test Article Administered by Intrathecal Injection in RatsSummary of Organ Weight Values  
Day 8

Day: 8 Relative to Start Date

| Sex: Male                                    |       | Vehicle  | Low Dose | Mid Dose | High Dose |
|----------------------------------------------|-------|----------|----------|----------|-----------|
| Body [g]<br>Weight<br>(g)                    | Mean  | 321.8    | 306.6    | 320.2    | 310.4     |
|                                              | SD    | 11.76    | 16.53    | 11.50    | 15.37     |
|                                              | N     | 5        | 5        | 5        | 5         |
|                                              | %Diff | -        | -4.7     | -0.5     | -3.5      |
| Brain [g]<br>(g)                             | Mean  | 1.9250   | 1.9042   | 1.9590   | 1.9598    |
|                                              | SD    | 0.14321  | 0.05512  | 0.05030  | 0.09907   |
|                                              | N     | 5        | 5        | 5        | 5         |
|                                              | %Diff | -        | -1.1     | 1.8      | 1.8       |
| Brain/BWt [g]<br>(%)                         | Mean  | 0.59829  | 0.62181  | 0.61271  | 0.63176   |
|                                              | SD    | 0.041531 | 0.019527 | 0.033746 | 0.026256  |
|                                              | N     | 5        | 5        | 5        | 5         |
|                                              | %Diff | -        | 3.9      | 2.4      | 5.6       |
| Adrenal [g]<br>glands<br>(g)                 | Mean  | 0.0584   | 0.0626   | 0.0666   | 0.0608    |
|                                              | SD    | 0.01555  | 0.01909  | 0.01252  | 0.01207   |
|                                              | N     | 5        | 5        | 5        | 5         |
|                                              | %Diff | -        | 7.2      | 14.0     | 4.1       |
| Adrenal gl/ [g]<br>BWt<br>(%)                | Mean  | 0.01827  | 0.02025  | 0.02073  | 0.01950   |
|                                              | SD    | 0.005454 | 0.005149 | 0.003249 | 0.003207  |
|                                              | N     | 5        | 5        | 5        | 5         |
|                                              | %Diff | -        | 10.8     | 13.4     | 6.7       |
| Adrenal gl/ [g]<br>BrWt<br>(ratio)           | Mean  | 0.03087  | 0.03276  | 0.03407  | 0.03101   |
|                                              | SD    | 0.010703 | 0.009334 | 0.006905 | 0.005806  |
|                                              | N     | 5        | 5        | 5        | 5         |
|                                              | %Diff | -        | 6.1      | 10.4     | 0.5       |
| Epididymides [g]<br>(g)                      | Mean  | 0.7040   | 0.6774   | 0.7456   | 0.7116    |
|                                              | SD    | 0.07069  | 0.05369  | 0.14500  | 0.06497   |
|                                              | N     | 5        | 5        | 5        | 5         |
|                                              | %Diff | -        | -3.8     | 5.9      | 1.1       |
| Epididymides [g] <sup>1</sup><br>/BWt<br>(%) | Mean  | 0.21938  | 0.22088  | 0.23265  | 0.22961   |
|                                              | SD    | 0.027291 | 0.011846 | 0.043025 | 0.023469  |
|                                              | N     | 5        | 5        | 5        | 5         |
|                                              | %Diff | -        | 0.7      | 6.0      | 4.7       |

[g] - Anova &amp; Dunnett

[g1] - Kruskal-Wallis &amp; Dunn

2759-001  
A Single Dose Toxicity Study of Test Article Administered by Intrathecal Injection in RatsSummary of Organ Weight Values  
Day 8

Day: 8 Relative to Start Date

| Sex: Male                            |       | Vehicle  | Low Dose  | Mid Dose | High Dose |
|--------------------------------------|-------|----------|-----------|----------|-----------|
| Epididymides [g]<br>/BrWt<br>(ratio) | Mean  | 0.36707  | 0.35544   | 0.38045  | 0.36482   |
|                                      | SD    | 0.042936 | 0.020845  | 0.073322 | 0.049635  |
|                                      | N     | 5        | 5         | 5        | 5         |
|                                      | %Diff | -        | -3.2      | 3.6      | -0.6      |
| Heart [g]<br>(g)                     | Mean  | 1.3744   | 1.3384    | 1.4394   | 1.5150    |
|                                      | SD    | 0.22698  | 0.25882   | 0.21808  | 0.31696   |
|                                      | N     | 5        | 5         | 5        | 5         |
|                                      | %Diff | -        | -2.6      | 4.7      | 10.2      |
| Heart/BWt [g]<br>(%)                 | Mean  | 0.42804  | 0.43471   | 0.44934  | 0.48612   |
|                                      | SD    | 0.076194 | 0.066392  | 0.064680 | 0.085220  |
|                                      | N     | 5        | 5         | 5        | 5         |
|                                      | %Diff | -        | 1.6       | 5.0      | 13.6      |
| Heart/BrWt [g]<br>(ratio)            | Mean  | 0.71219  | 0.70116   | 0.73641  | 0.77022   |
|                                      | SD    | 0.085336 | 0.121792  | 0.121296 | 0.135657  |
|                                      | N     | 5        | 5         | 5        | 5         |
|                                      | %Diff | -        | -1.5      | 3.4      | 8.1       |
| Kidneys [g]<br>(g)                   | Mean  | 3.1488   | 2.7654    | 2.9886   | 2.8942    |
|                                      | SD    | 0.21421  | 0.34834   | 0.14406  | 0.28079   |
|                                      | N     | 5        | 5         | 5        | 5         |
|                                      | %Diff | -        | -12.2     | -5.1     | -8.1      |
| Kidneys/BWt [g]<br>(%)               | Mean  | 0.97818  | 0.89955   | 0.93353  | 0.93088   |
|                                      | SD    | 0.049613 | 0.069633  | 0.036884 | 0.049584  |
|                                      | N     | 5        | 5         | 5        | 5         |
|                                      | %Diff | -        | -8.0      | -4.6     | -4.8      |
| Kidneys/BrWt [g]<br>(ratio)          | Mean  | 1.63823  | 1.44960   | 1.52640  | 1.47748   |
|                                      | SD    | 0.086479 | 0.147780  | 0.085331 | 0.129823  |
|                                      | N     | 5        | 5         | 5        | 5         |
|                                      | %Diff | -        | -11.5     | -6.8     | -9.8      |
| Liver [g]<br>(g)                     | Mean  | 14.7970  | 12.4866 a | 13.7358  | 12.9754   |
|                                      | SD    | 1.10214  | 1.01091   | 1.14122  | 1.37132   |
|                                      | N     | 5        | 5         | 5        | 5         |
|                                      | %Diff | -        | -15.6     | -7.2     | -12.3     |

[g] - Anova &amp; Dunnett: a = p &lt; 0.05

2759-001  
A Single Dose Toxicity Study of Test Article Administered by Intrathecal Injection in RatsSummary of Organ Weight Values  
Day 8

Day: 8 Relative to Start Date

| Sex: Male                                |       | Vehicle  | Low Dose  | Mid Dose | High Dose |
|------------------------------------------|-------|----------|-----------|----------|-----------|
| Liver/BWt [g]<br>(%)                     | Mean  | 4.59699  | 4.07372 a | 4.28599  | 4.17153   |
|                                          | SD    | 0.271405 | 0.276635  | 0.250328 | 0.250522  |
|                                          | N     | 5        | 5         | 5        | 5         |
|                                          | %Diff | -        | -11.4     | -6.8     | -9.3      |
| Liver/BrWt [g]<br>(ratio)                | Mean  | 7.72367  | 6.55271 a | 7.02330  | 6.62163 a |
|                                          | SD    | 0.818068 | 0.414568  | 0.715186 | 0.614430  |
|                                          | N     | 5        | 5         | 5        | 5         |
|                                          | %Diff | -        | -15.2     | -9.1     | -14.3     |
| Lung [g]<br>(g)                          | Mean  | 1.6148   | 1.6796    | 1.7722   | 1.7322    |
|                                          | SD    | 0.16046  | 0.30544   | 0.11333  | 0.21244   |
|                                          | N     | 5        | 5         | 5        | 5         |
|                                          | %Diff | -        | 4.0       | 9.7      | 7.3       |
| Lung/BWt [g]<br>(%)                      | Mean  | 0.50198  | 0.54718   | 0.55393  | 0.55648   |
|                                          | SD    | 0.048270 | 0.092405  | 0.038710 | 0.042788  |
|                                          | N     | 5        | 5         | 5        | 5         |
|                                          | %Diff | -        | 9.0       | 10.3     | 10.9      |
| Lung/BrWt [g]<br>(ratio)                 | Mean  | 0.83956  | 0.88058   | 0.90474  | 0.88284   |
|                                          | SD    | 0.066310 | 0.148320  | 0.054754 | 0.086066  |
|                                          | N     | 5        | 5         | 5        | 5         |
|                                          | %Diff | -        | 4.9       | 7.8      | 5.2       |
| Pituitary [g]<br>(fixed)<br>(g)          | Mean  | 0.01570  | 0.01478   | 0.01486  | 0.01450   |
|                                          | SD    | 0.002559 | 0.000820  | 0.001163 | 0.002266  |
|                                          | N     | 5        | 5         | 5        | 5         |
|                                          | %Diff | -        | -5.9      | -5.4     | -7.6      |
| Pituitary [g]<br>(fixed)/BWt<br>(%)      | Mean  | 0.00489  | 0.00483   | 0.00464  | 0.00468   |
|                                          | SD    | 0.000874 | 0.000249  | 0.000257 | 0.000768  |
|                                          | N     | 5        | 5         | 5        | 5         |
|                                          | %Diff | -        | -1.4      | -5.2     | -4.4      |
| Pituitary [g]<br>(fixed)/BrWt<br>(ratio) | Mean  | 0.00815  | 0.00776   | 0.00760  | 0.00738   |
|                                          | SD    | 0.001145 | 0.000287  | 0.000755 | 0.000993  |
|                                          | N     | 5        | 5         | 5        | 5         |
|                                          | %Diff | -        | -4.8      | -6.8     | -9.4      |

[g] - Anova &amp; Dunnett: a = p &lt; 0.05

2759-001  
A Single Dose Toxicity Study of Test Article Administered by Intrathecal Injection in RatsSummary of Organ Weight Values  
Day 8

Day: 8 Relative to Start Date

| Sex: Male                                   |       | Vehicle  | Low Dose | Mid Dose | High Dose |
|---------------------------------------------|-------|----------|----------|----------|-----------|
| Prostate [g]<br>gland<br>(g)                | Mean  | 0.6970   | 0.6400   | 0.6894   | 0.6834    |
|                                             | SD    | 0.13127  | 0.08620  | 0.19504  | 0.09921   |
|                                             | N     | 5        | 5        | 5        | 5         |
|                                             | %Diff | -        | -8.2     | -1.1     | -2.0      |
| Prostate [g]<br>gland/BWt<br>(%)            | Mean  | 0.21768  | 0.20879  | 0.21483  | 0.22056   |
|                                             | SD    | 0.046926 | 0.026595 | 0.058632 | 0.033378  |
|                                             | N     | 5        | 5        | 5        | 5         |
|                                             | %Diff | -        | -4.1     | -1.3     | 1.3       |
| Prostate [g]<br>gland/BrWt<br>(ratio)       | Mean  | 0.36559  | 0.33593  | 0.35144  | 0.34987   |
|                                             | SD    | 0.087511 | 0.042385 | 0.096141 | 0.057349  |
|                                             | N     | 5        | 5        | 5        | 5         |
|                                             | %Diff | -        | -8.1     | -3.9     | -4.3      |
| Sal, mand/ [g]<br>sub., rt<br>(g)           | Mean  | 0.2936   | 0.2726   | 0.3172   | 0.3024    |
|                                             | SD    | 0.02323  | 0.03706  | 0.02307  | 0.02386   |
|                                             | N     | 5        | 5        | 5        | 5         |
|                                             | %Diff | -        | -7.2     | 8.0      | 3.0       |
| Sal gl mand/ [g]<br>sub., rt/BWt<br>(%)     | Mean  | 0.09152  | 0.08864  | 0.09916  | 0.09737   |
|                                             | SD    | 0.010361 | 0.007746 | 0.007996 | 0.004918  |
|                                             | N     | 5        | 5        | 5        | 5         |
|                                             | %Diff | -        | -3.1     | 8.3      | 6.4       |
| Sal gl mand/ [g]<br>sub.,rt/BrWt<br>(ratio) | Mean  | 0.15356  | 0.14287  | 0.16184  | 0.15455   |
|                                             | SD    | 0.021315 | 0.016044 | 0.009429 | 0.013311  |
|                                             | N     | 5        | 5        | 5        | 5         |
|                                             | %Diff | -        | -7.0     | 5.4      | 0.6       |
| Spleen [g]<br>(g)                           | Mean  | 0.8182   | 0.8146   | 0.8498   | 0.8972    |
|                                             | SD    | 0.09743  | 0.11673  | 0.02588  | 0.09855   |
|                                             | N     | 5        | 5        | 5        | 5         |
|                                             | %Diff | -        | -0.4     | 3.9      | 9.7       |
| Spleen/BWt [g]<br>(%)                       | Mean  | 0.25455  | 0.26557  | 0.26560  | 0.28909   |
|                                             | SD    | 0.031840 | 0.034098 | 0.010662 | 0.028318  |
|                                             | N     | 5        | 5        | 5        | 5         |
|                                             | %Diff | -        | 4.3      | 4.3      | 13.6      |

[g] - Anova &amp; Dunnett

2759-001  
A Single Dose Toxicity Study of Test Article Administered by Intrathecal Injection in RatsSummary of Organ Weight Values  
Day 8

Day: 8 Relative to Start Date

| Sex: Male                          |       | Vehicle  | Low Dose | Mid Dose | High Dose |
|------------------------------------|-------|----------|----------|----------|-----------|
| Spleen/BrWt [g]<br>(ratio)         | Mean  | 0.42548  | 0.42776  | 0.43415  | 0.45884   |
|                                    | SD    | 0.042343 | 0.059126 | 0.021018 | 0.056306  |
|                                    | N     | 5        | 5        | 5        | 5         |
|                                    | %Diff | -        | 0.5      | 2.0      | 7.8       |
| Testes [g]<br>(g)                  | Mean  | 3.1754   | 3.1834   | 3.3376   | 3.2362    |
|                                    | SD    | 0.27554  | 0.43164  | 0.22360  | 0.12564   |
|                                    | N     | 5        | 5        | 5        | 5         |
|                                    | %Diff | -        | 0.3      | 5.1      | 1.9       |
| Testes/BWt [g]<br>(%)              | Mean  | 0.98717  | 1.03523  | 1.04283  | 1.04514   |
|                                    | SD    | 0.085863 | 0.088275 | 0.069564 | 0.073849  |
|                                    | N     | 5        | 5        | 5        | 5         |
|                                    | %Diff | -        | 4.9      | 5.6      | 5.9       |
| Testes/BrWt [g]<br>(ratio)         | Mean  | 1.64870  | 1.66911  | 1.70382  | 1.65486   |
|                                    | SD    | 0.042206 | 0.191492 | 0.108965 | 0.108654  |
|                                    | N     | 5        | 5        | 5        | 5         |
|                                    | %Diff | -        | 1.2      | 3.3      | 0.4       |
| Thymus [g]<br>(g)                  | Mean  | 0.6942   | 0.6364   | 0.6846   | 0.6746    |
|                                    | SD    | 0.17365  | 0.21561  | 0.07953  | 0.17988   |
|                                    | N     | 5        | 5        | 5        | 5         |
|                                    | %Diff | -        | -8.3     | -1.4     | -2.8      |
| Thymus/BWt [g]<br>(%)              | Mean  | 0.21480  | 0.20517  | 0.21455  | 0.21684   |
|                                    | SD    | 0.047341 | 0.056819 | 0.030529 | 0.054558  |
|                                    | N     | 5        | 5        | 5        | 5         |
|                                    | %Diff | -        | -4.5     | -0.1     | 1.0       |
| Thymus/BrWt [g]<br>(ratio)         | Mean  | 0.36275  | 0.33232  | 0.34935  | 0.34202   |
|                                    | SD    | 0.095791 | 0.104471 | 0.039050 | 0.079316  |
|                                    | N     | 5        | 5        | 5        | 5         |
|                                    | %Diff | -        | -8.4     | -3.7     | -5.7      |
| Thyroid/para [g]<br>(fixed)<br>(g) | Mean  | 0.02548  | 0.02202  | 0.02342  | 0.02216   |
|                                    | SD    | 0.002662 | 0.002121 | 0.003149 | 0.004787  |
|                                    | N     | 5        | 5        | 5        | 5         |
|                                    | %Diff | -        | -13.6    | -8.1     | -13.0     |

[g] - Anova &amp; Dunnett



2759-001  
 A Single Dose Toxicity Study of Test Article Administered by Intrathecal Injection in Rats

Summary of Organ Weight Values  
 Day 8

Day: 8 Relative to Start Date

| Sex: Male                                   |       | Vehicle  | Low Dose | Mid Dose | High Dose |
|---------------------------------------------|-------|----------|----------|----------|-----------|
| Thyroid/para [g]<br>(fixed)/Bwt<br>(%)      | Mean  | 0.00794  | 0.00718  | 0.00734  | 0.00718   |
|                                             | SD    | 0.001024 | 0.000511 | 0.001173 | 0.001737  |
|                                             | N     | 5        | 5        | 5        | 5         |
|                                             | %Diff | -        | -9.6     | -7.5     | -9.6      |
| Thyroid/para [g]<br>(fixed)/BrWt<br>(ratio) | Mean  | 0.01331  | 0.01155  | 0.01195  | 0.01139   |
|                                             | SD    | 0.001825 | 0.000828 | 0.001542 | 0.002789  |
|                                             | N     | 5        | 5        | 5        | 5         |
|                                             | %Diff | -        | -13.2    | -10.2    | -14.4     |

[g] - Anova & Dunnett

2759-001  
A Single Dose Toxicity Study of Test Article Administered by Intrathecal Injection in RatsSummary of Organ Weight Values  
Day 8

Day: 8 Relative to Start Date

| Sex: Female                        |       | Vehicle  | Low Dose | Mid Dose | High Dose |
|------------------------------------|-------|----------|----------|----------|-----------|
| Body [g]<br>Weight<br>(g)          | Mean  | 191.4    | 196.0    | 193.8    | 185.6     |
|                                    | SD    | 12.30    | 15.22    | 6.83     | 12.40     |
|                                    | N     | 5        | 5        | 5        | 5         |
|                                    | %Diff | -        | 2.4      | 1.3      | -3.0      |
| Brain [g]<br>(g)                   | Mean  | 1.8246   | 1.8668   | 1.8400   | 1.8338    |
|                                    | SD    | 0.07151  | 0.02067  | 0.07937  | 0.12045   |
|                                    | N     | 5        | 5        | 5        | 5         |
|                                    | %Diff | -        | 2.3      | 0.8      | 0.5       |
| Brain/BWt [g]<br>(%)               | Mean  | 0.95775  | 0.95700  | 0.95019  | 0.98859   |
|                                    | SD    | 0.092418 | 0.074080 | 0.048469 | 0.033125  |
|                                    | N     | 5        | 5        | 5        | 5         |
|                                    | %Diff | -        | -0.1     | -0.8     | 3.2       |
| Adrenal [g]<br>glands<br>(g)       | Mean  | 0.0664   | 0.0572   | 0.0714   | 0.0648    |
|                                    | SD    | 0.01199  | 0.00572  | 0.01659  | 0.01238   |
|                                    | N     | 5        | 5        | 5        | 5         |
|                                    | %Diff | -        | -13.9    | 7.5      | -2.4      |
| Adrenal gl/ [g]<br>BWt<br>(%)      | Mean  | 0.03488  | 0.02929  | 0.03693  | 0.03478   |
|                                    | SD    | 0.007186 | 0.003355 | 0.008987 | 0.005066  |
|                                    | N     | 5        | 5        | 5        | 5         |
|                                    | %Diff | -        | -16.0    | 5.9      | -0.3      |
| Adrenal gl/ [g]<br>BrWt<br>(ratio) | Mean  | 0.03644  | 0.03064  | 0.03873  | 0.03526   |
|                                    | SD    | 0.006716 | 0.003062 | 0.008094 | 0.005591  |
|                                    | N     | 5        | 5        | 5        | 5         |
|                                    | %Diff | -        | -15.9    | 6.3      | -3.2      |
| Heart [g]<br>(g)                   | Mean  | 0.9740   | 0.8442   | 0.8326   | 0.9424    |
|                                    | SD    | 0.18517  | 0.05959  | 0.08349  | 0.13109   |
|                                    | N     | 5        | 5        | 5        | 5         |
|                                    | %Diff | -        | -13.3    | -14.5    | -3.2      |
| Heart/BWt [g1]<br>(%)              | Mean  | 0.51426  | 0.43213  | 0.43016  | 0.50844   |
|                                    | SD    | 0.130481 | 0.036902 | 0.046904 | 0.069265  |
|                                    | N     | 5        | 5        | 5        | 5         |
|                                    | %Diff | -        | -16.0    | -16.4    | -1.1      |

[g] - Anova &amp; Dunnett

[g1] - Anova &amp; Dunnett(Log)

2759-001  
A Single Dose Toxicity Study of Test Article Administered by Intrathecal Injection in RatsSummary of Organ Weight Values  
Day 8

Day: 8 Relative to Start Date

| Sex: Female                 |       | Vehicle  | Low Dose | Mid Dose | High Dose |
|-----------------------------|-------|----------|----------|----------|-----------|
| Heart/BrWt [g]<br>(ratio)   | Mean  | 0.53214  | 0.45218  | 0.45240  | 0.51358   |
|                             | SD    | 0.084997 | 0.030694 | 0.038741 | 0.060370  |
|                             | N     | 5        | 5        | 5        | 5         |
|                             | %Diff | -        | -15.0    | -15.0    | -3.5      |
| Kidneys [g]<br>(g)          | Mean  | 1.8720   | 1.8946   | 1.8834   | 1.8892    |
|                             | SD    | 0.10707  | 0.15867  | 0.04244  | 0.11721   |
|                             | N     | 5        | 5        | 5        | 5         |
|                             | %Diff | -        | 1.2      | 0.6      | 0.9       |
| Kidneys/BWt [g]<br>(%)      | Mean  | 0.98051  | 0.96823  | 0.97289  | 1.01866   |
|                             | SD    | 0.072091 | 0.068824 | 0.043118 | 0.036504  |
|                             | N     | 5        | 5        | 5        | 5         |
|                             | %Diff | -        | -1.3     | -0.8     | 3.9       |
| Kidneys/BrWt [g]<br>(ratio) | Mean  | 1.02665  | 1.01456  | 1.02464  | 1.03164   |
|                             | SD    | 0.059284 | 0.078791 | 0.035498 | 0.057641  |
|                             | N     | 5        | 5        | 5        | 5         |
|                             | %Diff | -        | -1.2     | -0.2     | 0.5       |
| Liver [g]<br>(g)            | Mean  | 8.1428   | 7.7658   | 8.3960   | 7.9046    |
|                             | SD    | 0.59964  | 0.59726  | 0.31692  | 0.84024   |
|                             | N     | 5        | 5        | 5        | 5         |
|                             | %Diff | -        | -4.6     | 3.1      | -2.9      |
| Liver/BWt [g]<br>(%)        | Mean  | 4.26014  | 3.96755  | 4.33906  | 4.25027   |
|                             | SD    | 0.290120 | 0.232501 | 0.270728 | 0.184457  |
|                             | N     | 5        | 5        | 5        | 5         |
|                             | %Diff | -        | -6.9     | 1.9      | -0.2      |
| Liver/BrWt [g]<br>(ratio)   | Mean  | 4.46613  | 4.15992  | 4.57173  | 4.30621   |
|                             | SD    | 0.337197 | 0.314507 | 0.303256 | 0.300857  |
|                             | N     | 5        | 5        | 5        | 5         |
|                             | %Diff | -        | -6.9     | 2.4      | -3.6      |
| Lung [g]<br>(g)             | Mean  | 1.2312   | 1.2368   | 1.2016   | 1.2882    |
|                             | SD    | 0.14462  | 0.13521  | 0.18374  | 0.15127   |
|                             | N     | 5        | 5        | 5        | 5         |
|                             | %Diff | -        | 0.5      | -2.4     | 4.6       |

[g] - Anova &amp; Dunnett

2759-001  
A Single Dose Toxicity Study of Test Article Administered by Intrathecal Injection in RatsSummary of Organ Weight Values  
Day 8

Day: 8 Relative to Start Date

| Sex: Female                      |       | Vehicle  | Low Dose | Mid Dose | High Dose |
|----------------------------------|-------|----------|----------|----------|-----------|
| Lung/BWt [g]<br>(%)              | Mean  | 0.64237  | 0.63212  | 0.62062  | 0.69316   |
|                                  | SD    | 0.047285 | 0.061549 | 0.097857 | 0.053389  |
|                                  | N     | 5        | 5        | 5        | 5         |
|                                  | %Diff | -        | -1.6     | -3.4     | 7.9       |
| Lung/BrWt [g1]<br>(ratio)        | Mean  | 0.67574  | 0.66315  | 0.65236  | 0.70065   |
|                                  | SD    | 0.084828 | 0.079772 | 0.086770 | 0.038560  |
|                                  | N     | 5        | 5        | 5        | 5         |
|                                  | %Diff | -        | -1.9     | -3.5     | 3.7       |
| Ovaries [g]<br>(g)               | Mean  | 0.0880   | 0.0676   | 0.0844   | 0.0726    |
|                                  | SD    | 0.01762  | 0.01260  | 0.01623  | 0.01668   |
|                                  | N     | 5        | 5        | 5        | 5         |
|                                  | %Diff | -        | -23.2    | -4.1     | -17.5     |
| Ovaries/BWt [g]<br>(%)           | Mean  | 0.04658  | 0.03464  | 0.04368  | 0.03910   |
|                                  | SD    | 0.012563 | 0.006885 | 0.008983 | 0.008451  |
|                                  | N     | 5        | 5        | 5        | 5         |
|                                  | %Diff | -        | -25.6    | -6.2     | -16.1     |
| Ovaries/BrWt [g]<br>(ratio)      | Mean  | 0.04807  | 0.03618  | 0.04605  | 0.03951   |
|                                  | SD    | 0.008244 | 0.006543 | 0.009752 | 0.008158  |
|                                  | N     | 5        | 5        | 5        | 5         |
|                                  | %Diff | -        | -24.7    | -4.2     | -17.8     |
| Oviducts [g]<br>(g)              | Mean  | 0.0206   | 0.0236   | 0.0270   | 0.0210    |
|                                  | SD    | 0.00581  | 0.00167  | 0.00752  | 0.00245   |
|                                  | N     | 5        | 5        | 5        | 5         |
|                                  | %Diff | -        | 14.6     | 31.1     | 1.9       |
| Oviducts/BWt [g]<br>(%)          | Mean  | 0.01077  | 0.01210  | 0.01397  | 0.01130   |
|                                  | SD    | 0.002961 | 0.001313 | 0.004026 | 0.000853  |
|                                  | N     | 5        | 5        | 5        | 5         |
|                                  | %Diff | -        | 12.4     | 29.7     | 4.9       |
| Oviducts/ [g]<br>BrWt<br>(ratio) | Mean  | 0.01133  | 0.01264  | 0.01467  | 0.01143   |
|                                  | SD    | 0.003274 | 0.000797 | 0.003881 | 0.000773  |
|                                  | N     | 5        | 5        | 5        | 5         |
|                                  | %Diff | -        | 11.6     | 29.5     | 0.9       |

[g] - Anova &amp; Dunnett

[g1] - Anova &amp; Dunnett(Log)

2759-001  
A Single Dose Toxicity Study of Test Article Administered by Intrathecal Injection in RatsSummary of Organ Weight Values  
Day 8

Day: 8 Relative to Start Date

| Sex: Female                                  |       | Vehicle  | Low Dose | Mid Dose | High Dose |
|----------------------------------------------|-------|----------|----------|----------|-----------|
| Pituitary [g]<br>(fixed)<br>(g)              | Mean  | 0.01734  | 0.01740  | 0.01752  | 0.01732   |
|                                              | SD    | 0.001992 | 0.002529 | 0.002044 | 0.003518  |
|                                              | N     | 5        | 5        | 5        | 5         |
|                                              | %Diff | -        | 0.3      | 1.0      | -0.1      |
| Pituitary [g]<br>(fixed)/BWt<br>(%)          | Mean  | 0.00910  | 0.00892  | 0.00902  | 0.00928   |
|                                              | SD    | 0.001216 | 0.001500 | 0.000828 | 0.001408  |
|                                              | N     | 5        | 5        | 5        | 5         |
|                                              | %Diff | -        | -1.9     | -0.8     | 2.1       |
| Pituitary [g]<br>(fixed)/BrWt<br>(ratio)     | Mean  | 0.00952  | 0.00931  | 0.00951  | 0.00942   |
|                                              | SD    | 0.001269 | 0.001274 | 0.000928 | 0.001657  |
|                                              | N     | 5        | 5        | 5        | 5         |
|                                              | %Diff | -        | -2.2     | -0.1     | -1.1      |
| Sal, mand/ [g1]<br>sub., rt<br>(g)           | Mean  | 0.2412   | 0.1878   | 0.1960   | 0.1882    |
|                                              | SD    | 0.12072  | 0.01462  | 0.01639  | 0.03306   |
|                                              | N     | 5        | 5        | 5        | 5         |
|                                              | %Diff | -        | -22.1    | -18.7    | -22.0     |
| Sal gl mand/ [g1]<br>sub., rt/BWt<br>(%)     | Mean  | 0.12584  | 0.09606  | 0.10114  | 0.10088   |
|                                              | SD    | 0.060836 | 0.007667 | 0.007650 | 0.012167  |
|                                              | N     | 5        | 5        | 5        | 5         |
|                                              | %Diff | -        | -23.7    | -19.6    | -19.8     |
| Sal gl mand/ [g1]<br>sub.,rt/BrWt<br>(ratio) | Mean  | 0.13398  | 0.10062  | 0.10669  | 0.10234   |
|                                              | SD    | 0.072694 | 0.008182 | 0.010005 | 0.015035  |
|                                              | N     | 5        | 5        | 5        | 5         |
|                                              | %Diff | -        | -24.9    | -20.4    | -23.6     |
| Spleen [g]<br>(g)                            | Mean  | 0.4628   | 0.4872   | 0.5172   | 0.4608    |
|                                              | SD    | 0.03819  | 0.09443  | 0.05676  | 0.04473   |
|                                              | N     | 5        | 5        | 5        | 5         |
|                                              | %Diff | -        | 5.3      | 11.8     | -0.4      |
| Spleen/BWt [g]<br>(%)                        | Mean  | 0.24205  | 0.24714  | 0.26706  | 0.24914   |
|                                              | SD    | 0.017421 | 0.030136 | 0.029980 | 0.029329  |
|                                              | N     | 5        | 5        | 5        | 5         |
|                                              | %Diff | -        | 2.1      | 10.3     | 2.9       |

[g] - Anova &amp; Dunnett

[g1] - Kruskal-Wallis &amp; Dunn

2759-001  
A Single Dose Toxicity Study of Test Article Administered by Intrathecal Injection in RatsSummary of Organ Weight Values  
Day 8

Day: 8 Relative to Start Date

| Sex: Female                                  |       | Vehicle  | Low Dose | Mid Dose | High Dose |
|----------------------------------------------|-------|----------|----------|----------|-----------|
| Spleen/BrWt [g]<br>(ratio)                   | Mean  | 0.25413  | 0.26082  | 0.28125  | 0.25176   |
|                                              | SD    | 0.025916 | 0.049169 | 0.030142 | 0.025319  |
|                                              | N     | 5        | 5        | 5        | 5         |
|                                              | %Diff | -        | 2.6      | 10.7     | -0.9      |
| Thymus [g]<br>(g)                            | Mean  | 0.5890   | 0.5122   | 0.5634   | 0.5590    |
|                                              | SD    | 0.13383  | 0.08400  | 0.12405  | 0.12014   |
|                                              | N     | 5        | 5        | 5        | 5         |
|                                              | %Diff | -        | -13.0    | -4.3     | -5.1      |
| Thymus/BWt [g]<br>(%)                        | Mean  | 0.30865  | 0.26280  | 0.28993  | 0.30008   |
|                                              | SD    | 0.071288 | 0.047582 | 0.059201 | 0.053628  |
|                                              | N     | 5        | 5        | 5        | 5         |
|                                              | %Diff | -        | -14.9    | -6.1     | -2.8      |
| Thymus/BrWt [g]<br>(ratio)                   | Mean  | 0.32417  | 0.27447  | 0.30613  | 0.30406   |
|                                              | SD    | 0.082442 | 0.045507 | 0.064732 | 0.056652  |
|                                              | N     | 5        | 5        | 5        | 5         |
|                                              | %Diff | -        | -15.3    | -5.6     | -6.2      |
| Thyroid/para [g1]<br>(fixed)<br>(g)          | Mean  | 0.01982  | 0.01934  | 0.02112  | 0.01978   |
|                                              | SD    | 0.002629 | 0.001210 | 0.005396 | 0.003235  |
|                                              | N     | 5        | 5        | 5        | 5         |
|                                              | %Diff | -        | -2.4     | 6.6      | -0.2      |
| Thyroid/para [g]<br>(fixed)/BWt<br>(%)       | Mean  | 0.01040  | 0.00992  | 0.01092  | 0.01067   |
|                                              | SD    | 0.001547 | 0.001054 | 0.002889 | 0.001602  |
|                                              | N     | 5        | 5        | 5        | 5         |
|                                              | %Diff | -        | -4.6     | 5.0      | 2.6       |
| Thyroid/para [g2]<br>(fixed)/BrWt<br>(ratio) | Mean  | 0.01087  | 0.01036  | 0.01152  | 0.01076   |
|                                              | SD    | 0.001440 | 0.000701 | 0.003084 | 0.001343  |
|                                              | N     | 5        | 5        | 5        | 5         |
|                                              | %Diff | -        | -4.7     | 6.0      | -1.0      |
| Uterus w/<br>cervix<br>(g)                   | Mean  | 0.4918   | 0.4990   | 0.5222   | 0.4080    |
|                                              | SD    | 0.21611  | 0.21754  | 0.21041  | 0.02732   |
|                                              | N     | 5        | 5        | 5        | 5         |
|                                              | %Diff | -        | 1.5      | 6.2      | -17.0     |

[g] - Anova & Dunnett  
[g1] - Kruskal-Wallis & Dunn  
[g2] - Anova & Dunnett(Log)

2759-001  
 A Single Dose Toxicity Study of Test Article Administered by Intrathecal Injection in Rats

Summary of Organ Weight Values  
 Day 8

Day: 8 Relative to Start Date

| Sex: Female                              |       | Vehicle  | Low Dose | Mid Dose | High Dose |
|------------------------------------------|-------|----------|----------|----------|-----------|
| Uterus w/ [g]<br>cervix/BWt<br>(%)       | Mean  | 0.25730  | 0.25446  | 0.27043  | 0.22033   |
|                                          | SD    | 0.110911 | 0.103182 | 0.110807 | 0.016149  |
|                                          | N     | 5        | 5        | 5        | 5         |
|                                          | %Diff | -        | -1.1     | 5.1      | -14.4     |
| Uterus w/ [g1]<br>cervix/BrWt<br>(ratio) | Mean  | 0.27186  | 0.26827  | 0.28342  | 0.22270   |
|                                          | SD    | 0.129218 | 0.120568 | 0.110140 | 0.011086  |
|                                          | N     | 5        | 5        | 5        | 5         |
|                                          | %Diff | -        | -1.3     | 4.3      | -18.1     |

[g] - Anova & Dunnett(Log)  
 [g1] - Kruskal-Wallis & Dunn

**Table 5**  
**Summary of Organ Weight Values (Day 29)**



2759-001  
A Single Dose Toxicity Study of Test Article Administered by Intrathecal Injection in RatsSummary of Organ Weight Values  
Day 29

Day: 29 Relative to Start Date

| Sex: Male                          |       | Vehicle  | Low Dose | Mid Dose | High Dose |
|------------------------------------|-------|----------|----------|----------|-----------|
| Body [g]<br>Weight<br>(g)          | Mean  | 424.8    | 428.4    | 412.8    | 430.6     |
|                                    | SD    | 20.04    | 17.90    | 48.14    | 76.17     |
|                                    | N     | 5        | 5        | 5        | 5         |
|                                    | %Diff | -        | 0.8      | -2.8     | 1.4       |
| Brain [g]<br>(g)                   | Mean  | 2.0812   | 2.0652   | 2.0534   | 2.1064    |
|                                    | SD    | 0.08752  | 0.13752  | 0.06137  | 0.05044   |
|                                    | N     | 5        | 5        | 5        | 5         |
|                                    | %Diff | -        | -0.8     | -1.3     | 1.2       |
| Brain/BWt [g]<br>(%)               | Mean  | 0.49010  | 0.48192  | 0.50267  | 0.49986   |
|                                    | SD    | 0.009551 | 0.020201 | 0.057696 | 0.078669  |
|                                    | N     | 5        | 5        | 5        | 5         |
|                                    | %Diff | -        | -1.7     | 2.6      | 2.0       |
| Adrenal [g]<br>glands<br>(g)       | Mean  | 0.0794   | 0.0772   | 0.0678   | 0.0766    |
|                                    | SD    | 0.00733  | 0.01156  | 0.01033  | 0.01540   |
|                                    | N     | 5        | 5        | 5        | 5         |
|                                    | %Diff | -        | -2.8     | -14.6    | -3.5      |
| Adrenal gl/ [g]<br>BWt<br>(%)      | Mean  | 0.01873  | 0.01802  | 0.01664  | 0.01777   |
|                                    | SD    | 0.001992 | 0.002575 | 0.003383 | 0.001492  |
|                                    | N     | 5        | 5        | 5        | 5         |
|                                    | %Diff | -        | -3.8     | -11.2    | -5.1      |
| Adrenal gl/ [g]<br>BrWt<br>(ratio) | Mean  | 0.03817  | 0.03746  | 0.03298  | 0.03631   |
|                                    | SD    | 0.003528 | 0.005664 | 0.004490 | 0.006847  |
|                                    | N     | 5        | 5        | 5        | 5         |
|                                    | %Diff | -        | -1.9     | -13.6    | -4.9      |
| Epididymides [g]<br>(g)            | Mean  | 1.4058   | 1.2644 a | 1.2596 a | 1.2984    |
|                                    | SD    | 0.08152  | 0.06512  | 0.07181  | 0.09127   |
|                                    | N     | 5        | 5        | 5        | 5         |
|                                    | %Diff | -        | -10.1    | -10.4    | -7.6      |
| Epididymides [g]<br>/BWt<br>(%)    | Mean  | 0.33211  | 0.29561  | 0.30753  | 0.30680   |
|                                    | SD    | 0.033894 | 0.020357 | 0.029315 | 0.043296  |
|                                    | N     | 5        | 5        | 5        | 5         |
|                                    | %Diff | -        | -11.0    | -7.4     | -7.6      |

[g] - Anova &amp; Dunnett: a = p &lt; 0.05

2759-001  
A Single Dose Toxicity Study of Test Article Administered by Intrathecal Injection in RatsSummary of Organ Weight Values  
Day 29

Day: 29 Relative to Start Date

| Sex: Male                            |       | Vehicle  | Low Dose | Mid Dose | High Dose |
|--------------------------------------|-------|----------|----------|----------|-----------|
| Epididymides [g]<br>/BrWt<br>(ratio) | Mean  | 0.67702  | 0.61541  | 0.61377  | 0.61603   |
|                                      | SD    | 0.059205 | 0.064925 | 0.037939 | 0.032922  |
|                                      | N     | 5        | 5        | 5        | 5         |
|                                      | %Diff | -        | -9.1     | -9.3     | -9.0      |
| Heart [g]<br>(g)                     | Mean  | 1.5930   | 1.6760   | 1.5262   | 1.8700    |
|                                      | SD    | 0.15541  | 0.17503  | 0.21268  | 0.30028   |
|                                      | N     | 5        | 5        | 5        | 5         |
|                                      | %Diff | -        | 5.2      | -4.2     | 17.4      |
| Heart/BWt [g]<br>(%)                 | Mean  | 0.37563  | 0.39176  | 0.37003  | 0.43751   |
|                                      | SD    | 0.039439 | 0.042916 | 0.031163 | 0.054140  |
|                                      | N     | 5        | 5        | 5        | 5         |
|                                      | %Diff | -        | 4.3      | -1.5     | 16.5      |
| Heart/BrWt [g]<br>(ratio)            | Mean  | 0.76592  | 0.81423  | 0.74411  | 0.88602   |
|                                      | SD    | 0.072395 | 0.094042 | 0.111070 | 0.126166  |
|                                      | N     | 5        | 5        | 5        | 5         |
|                                      | %Diff | -        | 6.3      | -2.8     | 15.7      |
| Kidneys [g]<br>(g)                   | Mean  | 3.6898   | 3.6490   | 3.4558   | 3.6642    |
|                                      | SD    | 0.27064  | 0.46621  | 0.54630  | 0.39657   |
|                                      | N     | 5        | 5        | 5        | 5         |
|                                      | %Diff | -        | -1.1     | -6.3     | -0.7      |
| Kidneys/BWt [g]<br>(%)               | Mean  | 0.87031  | 0.85062  | 0.83583  | 0.86075   |
|                                      | SD    | 0.079110 | 0.090002 | 0.063285 | 0.091558  |
|                                      | N     | 5        | 5        | 5        | 5         |
|                                      | %Diff | -        | -2.3     | -4.0     | -1.1      |
| Kidneys/BrWt [g]<br>(ratio)          | Mean  | 1.77467  | 1.76782  | 1.68648  | 1.73948   |
|                                      | SD    | 0.140931 | 0.199601 | 0.293295 | 0.181950  |
|                                      | N     | 5        | 5        | 5        | 5         |
|                                      | %Diff | -        | -0.4     | -5.0     | -2.0      |
| Liver [g]<br>(g)                     | Mean  | 16.9814  | 15.8602  | 14.5980  | 15.5666   |
|                                      | SD    | 0.61408  | 1.80177  | 1.98181  | 3.49767   |
|                                      | N     | 5        | 5        | 5        | 5         |
|                                      | %Diff | -        | -6.6     | -14.0    | -8.3      |

[g] - Anova &amp; Dunnett

2759-001  
A Single Dose Toxicity Study of Test Article Administered by Intrathecal Injection in RatsSummary of Organ Weight Values  
Day 29

Day: 29 Relative to Start Date

| Sex: Male                                |       | Vehicle  | Low Dose | Mid Dose  | High Dose |
|------------------------------------------|-------|----------|----------|-----------|-----------|
| Liver/BWt [g]<br>(%)                     | Mean  | 4.00154  | 3.69754  | 3.53469 a | 3.59563 a |
|                                          | SD    | 0.157552 | 0.335785 | 0.183720  | 0.178573  |
|                                          | N     | 5        | 5        | 5         | 5         |
|                                          | %Diff | -        | -7.6     | -11.7     | -10.1     |
| Liver/BrWt [g]<br>(ratio)                | Mean  | 8.16498  | 7.69109  | 7.12001   | 7.38358   |
|                                          | SD    | 0.282185 | 0.847655 | 1.058682  | 1.580477  |
|                                          | N     | 5        | 5        | 5         | 5         |
|                                          | %Diff | -        | -5.8     | -12.8     | -9.6      |
| Lung [g]<br>(g)                          | Mean  | 1.7852   | 1.6752   | 1.8804    | 2.1218    |
|                                          | SD    | 0.23102  | 0.18829  | 0.37795   | 0.34342   |
|                                          | N     | 5        | 5        | 5         | 5         |
|                                          | %Diff | -        | -6.2     | 5.3       | 18.9      |
| Lung/BWt [g]<br>(%)                      | Mean  | 0.42113  | 0.39187  | 0.45251   | 0.50630   |
|                                          | SD    | 0.058512 | 0.050332 | 0.043541  | 0.135770  |
|                                          | N     | 5        | 5        | 5         | 5         |
|                                          | %Diff | -        | -6.9     | 7.5       | 20.2      |
| Lung/BrWt [g]<br>(ratio)                 | Mean  | 0.85859  | 0.81172  | 0.91549   | 1.00580   |
|                                          | SD    | 0.111318 | 0.083884 | 0.179776  | 0.149872  |
|                                          | N     | 5        | 5        | 5         | 5         |
|                                          | %Diff | -        | -5.5     | 6.6       | 17.1      |
| Pituitary [g]<br>(fixed)<br>(g)          | Mean  | 0.01826  | 0.01852  | 0.01648   | 0.01580   |
|                                          | SD    | 0.001313 | 0.003093 | 0.002359  | 0.001756  |
|                                          | N     | 5        | 5        | 5         | 5         |
|                                          | %Diff | -        | 1.4      | -9.7      | -13.5     |
| Pituitary [g]<br>(fixed)/BWt<br>(%)      | Mean  | 0.00431  | 0.00431  | 0.00400   | 0.00374   |
|                                          | SD    | 0.000418 | 0.000593 | 0.000400  | 0.000616  |
|                                          | N     | 5        | 5        | 5         | 5         |
|                                          | %Diff | -        | 0.0      | -7.2      | -13.2     |
| Pituitary [g]<br>(fixed)/BrWt<br>(ratio) | Mean  | 0.00879  | 0.00892  | 0.00804   | 0.00751   |
|                                          | SD    | 0.000712 | 0.000915 | 0.001262  | 0.000927  |
|                                          | N     | 5        | 5        | 5         | 5         |
|                                          | %Diff | -        | 1.6      | -8.5      | -14.5     |

[g] - Anova &amp; Dunnett: a = p &lt; 0.05

2759-001  
A Single Dose Toxicity Study of Test Article Administered by Intrathecal Injection in RatsSummary of Organ Weight Values  
Day 29

Day: 29 Relative to Start Date

| Sex: Male                                   |       | Vehicle  | Low Dose | Mid Dose  | High Dose |
|---------------------------------------------|-------|----------|----------|-----------|-----------|
| Prostate [g]<br>gland<br>(g)                | Mean  | 1.1866   | 1.2762   | 1.2976    | 1.2570    |
|                                             | SD    | 0.19398  | 0.12599  | 0.24517   | 0.09633   |
|                                             | N     | 5        | 5        | 5         | 5         |
|                                             | %Diff | -        | 7.6      | 9.4       | 5.9       |
| Prostate [g]<br>gland/BWt<br>(%)            | Mean  | 0.28095  | 0.29907  | 0.31690   | 0.29816   |
|                                             | SD    | 0.056625 | 0.040740 | 0.070375  | 0.049038  |
|                                             | N     | 5        | 5        | 5         | 5         |
|                                             | %Diff | -        | 6.4      | 12.8      | 6.1       |
| Prostate [g]<br>gland/BrWt<br>(ratio)       | Mean  | 0.57228  | 0.62161  | 0.63415   | 0.59680   |
|                                             | SD    | 0.108277 | 0.089767 | 0.132262  | 0.044350  |
|                                             | N     | 5        | 5        | 5         | 5         |
|                                             | %Diff | -        | 8.6      | 10.8      | 4.3       |
| Sal, mand/ [g]<br>sub., rt<br>(g)           | Mean  | 0.3962   | 0.3690   | 0.3356    | 0.3556    |
|                                             | SD    | 0.03285  | 0.04515  | 0.02895   | 0.04449   |
|                                             | N     | 5        | 5        | 5         | 5         |
|                                             | %Diff | -        | -6.9     | -15.3     | -10.2     |
| Sal gl mand/ [g]<br>sub., rt/BWt<br>(%)     | Mean  | 0.09367  | 0.08625  | 0.08172   | 0.08421   |
|                                             | SD    | 0.011774 | 0.011112 | 0.006413  | 0.014935  |
|                                             | N     | 5        | 5        | 5         | 5         |
|                                             | %Diff | -        | -7.9     | -12.8     | -10.1     |
| Sal gl mand/ [g]<br>sub.,rt/BrWt<br>(ratio) | Mean  | 0.19092  | 0.17857  | 0.16373   | 0.16891   |
|                                             | SD    | 0.021378 | 0.017637 | 0.017428  | 0.021617  |
|                                             | N     | 5        | 5        | 5         | 5         |
|                                             | %Diff | -        | -6.5     | -14.2     | -11.5     |
| Spleen [g1]<br>(g)                          | Mean  | 0.8170   | 0.8076   | 1.0530    | 0.9064    |
|                                             | SD    | 0.07550  | 0.14213  | 0.27262   | 0.12972   |
|                                             | N     | 5        | 5        | 5         | 5         |
|                                             | %Diff | -        | -1.2     | 28.9      | 10.9      |
| Spleen/BWt [g]<br>(%)                       | Mean  | 0.19293  | 0.18973  | 0.25449 a | 0.21235   |
|                                             | SD    | 0.022513 | 0.041844 | 0.049945  | 0.024464  |
|                                             | N     | 5        | 5        | 5         | 5         |
|                                             | %Diff | -        | -1.7     | 31.9      | 10.1      |

|                                                                    |
|--------------------------------------------------------------------|
| [g] - Anova & Dunnett: a = p < 0.05<br>[g1] - Anova & Dunnett(Log) |
|--------------------------------------------------------------------|

2759-001  
A Single Dose Toxicity Study of Test Article Administered by Intrathecal Injection in RatsSummary of Organ Weight Values  
Day 29

Day: 29 Relative to Start Date

| Sex: Male                           |       | Vehicle  | Low Dose | Mid Dose  | High Dose |
|-------------------------------------|-------|----------|----------|-----------|-----------|
| Spleen/BrWt [g]<br>(ratio)          | Mean  | 0.39331  | 0.39357  | 0.51463   | 0.43004   |
|                                     | SD    | 0.041463 | 0.084214 | 0.143131  | 0.058209  |
|                                     | N     | 5        | 5        | 5         | 5         |
|                                     | %Diff | -        | 0.1      | 30.8      | 9.3       |
| Testes [g1]<br>(g)                  | Mean  | 3.6934   | 3.5542   | 3.6848    | 3.6902    |
|                                     | SD    | 0.34075  | 0.26375  | 0.26910   | 0.21554   |
|                                     | N     | 5        | 5        | 5         | 5         |
|                                     | %Diff | -        | -3.8     | -0.2      | -0.1      |
| Testes/BWt [g1]<br>(%)              | Mean  | 0.87094  | 0.82942  | 0.90098   | 0.87158   |
|                                     | SD    | 0.089134 | 0.046405 | 0.110961  | 0.108891  |
|                                     | N     | 5        | 5        | 5         | 5         |
|                                     | %Diff | -        | -4.8     | 3.4       | 0.1       |
| Testes/BrWt [g1]<br>(ratio)         | Mean  | 1.77498  | 1.72565  | 1.79681   | 1.75339   |
|                                     | SD    | 0.152396 | 0.154120 | 0.155997  | 0.122632  |
|                                     | N     | 5        | 5        | 5         | 5         |
|                                     | %Diff | -        | -2.8     | 1.2       | -1.2      |
| Thymus [g1]<br>(g)                  | Mean  | 0.4624   | 0.5054   | 0.5980    | 0.5778    |
|                                     | SD    | 0.11724  | 0.09868  | 0.19374   | 0.09141   |
|                                     | N     | 5        | 5        | 5         | 5         |
|                                     | %Diff | -        | 9.3      | 29.3      | 25.0      |
| Thymus/BWt [g1]<br>(%)              | Mean  | 0.10857  | 0.11840  | 0.14312   | 0.13633   |
|                                     | SD    | 0.024950 | 0.025174 | 0.033642  | 0.026082  |
|                                     | N     | 5        | 5        | 5         | 5         |
|                                     | %Diff | -        | 9.1      | 31.8      | 25.6      |
| Thymus/BrWt<br>(ratio)              | Mean  | 0.22153  | 0.24596  | 0.29108   | 0.27427   |
|                                     | SD    | 0.050453 | 0.053612 | 0.091575  | 0.042494  |
|                                     | N     | 5        | 5        | 5         | 5         |
|                                     | %Diff | -        | 11.0     | 31.4      | 23.8      |
| Thyroid/para [g1]<br>(fixed)<br>(g) | Mean  | 0.03464  | 0.03058  | 0.02686 b | 0.02692 b |
|                                     | SD    | 0.002601 | 0.002794 | 0.003652  | 0.003552  |
|                                     | N     | 5        | 5        | 5         | 5         |
|                                     | %Diff | -        | -11.7    | -22.5     | -22.3     |

[g] - Anova &amp; Dunnett(Log)

[g1] - Anova &amp; Dunnett: b = p &lt; 0.01

2759-001  
 A Single Dose Toxicity Study of Test Article Administered by Intrathecal Injection in Rats

Summary of Organ Weight Values  
 Day 29

Day: 29 Relative to Start Date

| Sex: Male                                   |       | Vehicle  | Low Dose | Mid Dose  | High Dose |
|---------------------------------------------|-------|----------|----------|-----------|-----------|
| Thyroid/para [g]<br>(fixed)/Bwt<br>(%)      | Mean  | 0.00818  | 0.00714  | 0.00654 b | 0.00629 b |
|                                             | SD    | 0.000884 | 0.000587 | 0.000959  | 0.000377  |
|                                             | N     | 5        | 5        | 5         | 5         |
|                                             | %Diff | -        | -12.7    | -20.0     | -23.1     |
| Thyroid/para [g]<br>(fixed)/BrWt<br>(ratio) | Mean  | 0.01669  | 0.01481  | 0.01307 b | 0.01279 b |
|                                             | SD    | 0.001804 | 0.000898 | 0.001644  | 0.001671  |
|                                             | N     | 5        | 5        | 5         | 5         |
|                                             | %Diff | -        | -11.3    | -21.7     | -23.4     |

[g] - Anova & Dunnett: b = p < 0.01

2759-001  
A Single Dose Toxicity Study of Test Article Administered by Intrathecal Injection in RatsSummary of Organ Weight Values  
Day 29

Day: 29 Relative to Start Date

| Sex: Female                        |       | Vehicle  | Low Dose | Mid Dose | High Dose |
|------------------------------------|-------|----------|----------|----------|-----------|
| Body [g]<br>Weight<br>(g)          | Mean  | 239.0    | 215.4    | 217.0    | 222.0     |
|                                    | SD    | 16.45    | 16.77    | 23.47    | 24.81     |
|                                    | N     | 5        | 5        | 5        | 5         |
|                                    | %Diff | -        | -9.9     | -9.2     | -7.1      |
| Brain [g]<br>(g)                   | Mean  | 1.9694   | 1.8742   | 1.8726   | 1.9056    |
|                                    | SD    | 0.09438  | 0.06797  | 0.12063  | 0.06379   |
|                                    | N     | 5        | 5        | 5        | 5         |
|                                    | %Diff | -        | -4.8     | -4.9     | -3.2      |
| Brain/BWt [g]<br>(%)               | Mean  | 0.82597  | 0.87276  | 0.86659  | 0.86708   |
|                                    | SD    | 0.047198 | 0.047690 | 0.045652 | 0.102031  |
|                                    | N     | 5        | 5        | 5        | 5         |
|                                    | %Diff | -        | 5.7      | 4.9      | 5.0       |
| Adrenal [g]<br>glands<br>(g)       | Mean  | 0.0744   | 0.0700   | 0.0676   | 0.0916    |
|                                    | SD    | 0.01178  | 0.01373  | 0.01041  | 0.02130   |
|                                    | N     | 5        | 5        | 5        | 5         |
|                                    | %Diff | -        | -5.9     | -9.1     | 23.1      |
| Adrenal gl/ [g]<br>BWt<br>(%)      | Mean  | 0.03133  | 0.03277  | 0.03143  | 0.04101   |
|                                    | SD    | 0.005776 | 0.007451 | 0.005532 | 0.006780  |
|                                    | N     | 5        | 5        | 5        | 5         |
|                                    | %Diff | -        | 4.6      | 0.3      | 30.9      |
| Adrenal gl/ [g]<br>BrWt<br>(ratio) | Mean  | 0.03802  | 0.03755  | 0.03621  | 0.04803   |
|                                    | SD    | 0.007321 | 0.008509 | 0.005920 | 0.010668  |
|                                    | N     | 5        | 5        | 5        | 5         |
|                                    | %Diff | -        | -1.2     | -4.7     | 26.3      |
| Heart [g]<br>(g)                   | Mean  | 0.9096   | 0.8448   | 0.8920   | 1.0042    |
|                                    | SD    | 0.10339  | 0.07755  | 0.10544  | 0.14268   |
|                                    | N     | 5        | 5        | 5        | 5         |
|                                    | %Diff | -        | -7.1     | -1.9     | 10.4      |
| Heart/BWt [g]<br>(%)               | Mean  | 0.38398  | 0.39333  | 0.41086  | 0.45191   |
|                                    | SD    | 0.067911 | 0.037789 | 0.013184 | 0.033544  |
|                                    | N     | 5        | 5        | 5        | 5         |
|                                    | %Diff | -        | 2.4      | 7.0      | 17.7      |

[g] - Anova &amp; Dunnett

2759-001  
A Single Dose Toxicity Study of Test Article Administered by Intrathecal Injection in RatsSummary of Organ Weight Values  
Day 29

Day: 29 Relative to Start Date

| Sex: Female                 |       | Vehicle  | Low Dose  | Mid Dose | High Dose |
|-----------------------------|-------|----------|-----------|----------|-----------|
| Heart/BrWt [g]<br>(ratio)   | Mean  | 0.46330  | 0.45101   | 0.47521  | 0.52667   |
|                             | SD    | 0.063675 | 0.042176  | 0.030470 | 0.068543  |
|                             | N     | 5        | 5         | 5        | 5         |
|                             | %Diff | -        | -2.7      | 2.6      | 13.7      |
| Kidneys [g]<br>(g)          | Mean  | 1.8350   | 1.8626    | 1.8092   | 1.9058    |
|                             | SD    | 0.12585  | 0.15893   | 0.27377  | 0.20671   |
|                             | N     | 5        | 5         | 5        | 5         |
|                             | %Diff | -        | 1.5       | -1.4     | 3.9       |
| Kidneys/BWt [g]<br>(%)      | Mean  | 0.76920  | 0.86549 a | 0.83080  | 0.85929 a |
|                             | SD    | 0.052960 | 0.054644  | 0.046818 | 0.033846  |
|                             | N     | 5        | 5         | 5        | 5         |
|                             | %Diff | -        | 12.5      | 8.0      | 11.7      |
| Kidneys/BrWt [g]<br>(ratio) | Mean  | 0.93253  | 0.99419   | 0.96285  | 1.00043   |
|                             | SD    | 0.064350 | 0.084530  | 0.100455 | 0.106865  |
|                             | N     | 5        | 5         | 5        | 5         |
|                             | %Diff | -        | 6.6       | 3.3      | 7.3       |
| Liver [g1]<br>(g)           | Mean  | 8.4688   | 8.3660    | 8.3644   | 8.4880    |
|                             | SD    | 0.52046  | 0.71902   | 1.22966  | 1.64545   |
|                             | N     | 5        | 5         | 5        | 5         |
|                             | %Diff | -        | -1.2      | -1.2     | 0.2       |
| Liver/BWt [g]<br>(%)        | Mean  | 3.55444  | 3.89165   | 3.84988  | 3.79882   |
|                             | SD    | 0.294742 | 0.321773  | 0.318121 | 0.383506  |
|                             | N     | 5        | 5         | 5        | 5         |
|                             | %Diff | -        | 9.5       | 8.3      | 6.9       |
| Liver/BrWt [g]<br>(ratio)   | Mean  | 4.30228  | 4.46600   | 4.45678  | 4.45777   |
|                             | SD    | 0.228742 | 0.392010  | 0.494012 | 0.877861  |
|                             | N     | 5        | 5         | 5        | 5         |
|                             | %Diff | -        | 3.8       | 3.6      | 3.6       |
| Lung [g2]<br>(g)            | Mean  | 1.4840   | 1.2412    | 1.2112   | 1.2232    |
|                             | SD    | 0.35286  | 0.10872   | 0.19733  | 0.06566   |
|                             | N     | 5        | 5         | 5        | 5         |
|                             | %Diff | -        | -16.4     | -18.4    | -17.6     |

[g] - Anova & Dunnett: a = p < 0.05  
[g1] - Kruskal-Wallis & Dunn  
[g2] - Anova & Dunnett(Log)



2759-001  
A Single Dose Toxicity Study of Test Article Administered by Intrathecal Injection in RatsSummary of Organ Weight Values  
Day 29

Day: 29 Relative to Start Date

| Sex: Female                       |       | Vehicle  | Low Dose | Mid Dose | High Dose |
|-----------------------------------|-------|----------|----------|----------|-----------|
| Lung/BWt [g]<br>(%)               | Mean  | 0.61849  | 0.57610  | 0.56105  | 0.55435   |
|                                   | SD    | 0.123603 | 0.016295 | 0.096499 | 0.040592  |
|                                   | N     | 5        | 5        | 5        | 5         |
|                                   | %Diff | -        | -6.9     | -9.3     | -10.4     |
| Lung/BrWt [g1]<br>(ratio)         | Mean  | 0.75038  | 0.66179  | 0.64715  | 0.64227   |
|                                   | SD    | 0.154013 | 0.043332 | 0.100871 | 0.036181  |
|                                   | N     | 5        | 5        | 5        | 5         |
|                                   | %Diff | -        | -11.8    | -13.8    | -14.4     |
| Ovaries [g]<br>(g)                | Mean  | 0.0844   | 0.0790   | 0.0692   | 0.0918    |
|                                   | SD    | 0.01788  | 0.01602  | 0.02195  | 0.03667   |
|                                   | N     | 5        | 5        | 5        | 5         |
|                                   | %Diff | -        | -6.4     | -18.0    | 8.8       |
| Ovaries/BWt [g]<br>(%)            | Mean  | 0.03575  | 0.03706  | 0.03162  | 0.04123   |
|                                   | SD    | 0.009406 | 0.008541 | 0.007832 | 0.014895  |
|                                   | N     | 5        | 5        | 5        | 5         |
|                                   | %Diff | -        | 3.7      | -11.6    | 15.3      |
| Ovaries/BrWt [g]<br>(ratio)       | Mean  | 0.04296  | 0.04239  | 0.03667  | 0.04797   |
|                                   | SD    | 0.009659 | 0.009612 | 0.009917 | 0.018926  |
|                                   | N     | 5        | 5        | 5        | 5         |
|                                   | %Diff | -        | -1.3     | -14.6    | 11.7      |
| Oviducts [g2]<br>(g)              | Mean  | 0.0258   | 0.0276   | 0.0274   | 0.0284    |
|                                   | SD    | 0.01314  | 0.00456  | 0.00508  | 0.00594   |
|                                   | N     | 5        | 5        | 5        | 5         |
|                                   | %Diff | -        | 7.0      | 6.2      | 10.1      |
| Oviducts/BWt<br>(%)               | Mean  | 0.01098  | 0.01295  | 0.01271  | 0.01269   |
|                                   | SD    | 0.006226 | 0.002694 | 0.002542 | 0.001489  |
|                                   | N     | 5        | 5        | 5        | 5         |
|                                   | %Diff | -        | 17.9     | 15.8     | 15.6      |
| Oviducts/ [g2]<br>BrWt<br>(ratio) | Mean  | 0.01319  | 0.01481  | 0.01467  | 0.01493   |
|                                   | SD    | 0.007044 | 0.002884 | 0.002813 | 0.003249  |
|                                   | N     | 5        | 5        | 5        | 5         |
|                                   | %Diff | -        | 12.2     | 11.2     | 13.2      |

[g] - Anova & Dunnett  
[g1] - Kruskal-Wallis & Dunn  
[g2] - Anova & Dunnett(Log)

2759-001  
A Single Dose Toxicity Study of Test Article Administered by Intrathecal Injection in RatsSummary of Organ Weight Values  
Day 29

Day: 29 Relative to Start Date

| Sex: Female                                 |       | Vehicle  | Low Dose | Mid Dose | High Dose |
|---------------------------------------------|-------|----------|----------|----------|-----------|
| Pituitary [g]<br>(fixed)<br>(g)             | Mean  | 0.01828  | 0.01998  | 0.01636  | 0.01772   |
|                                             | SD    | 0.002025 | 0.001506 | 0.003709 | 0.003458  |
|                                             | N     | 5        | 5        | 5        | 5         |
|                                             | %Diff | -        | 9.3      | -10.5    | -3.1      |
| Pituitary [g]<br>(fixed)/BWt<br>(%)         | Mean  | 0.00772  | 0.00932  | 0.00763  | 0.00795   |
|                                             | SD    | 0.001337 | 0.001016 | 0.002140 | 0.000971  |
|                                             | N     | 5        | 5        | 5        | 5         |
|                                             | %Diff | -        | 20.8     | -1.1     | 3.0       |
| Pituitary [g]<br>(fixed)/BrWt<br>(ratio)    | Mean  | 0.00931  | 0.01067  | 0.00876  | 0.00928   |
|                                             | SD    | 0.001221 | 0.000903 | 0.002096 | 0.001643  |
|                                             | N     | 5        | 5        | 5        | 5         |
|                                             | %Diff | -        | 14.7     | -5.9     | -0.3      |
| Sal, mand/ [g]<br>sub., rt<br>(g)           | Mean  | 0.2278   | 0.2040   | 0.1728   | 0.1922    |
|                                             | SD    | 0.05139  | 0.03090  | 0.05213  | 0.06563   |
|                                             | N     | 5        | 5        | 5        | 5         |
|                                             | %Diff | -        | -10.4    | -24.1    | -15.6     |
| Sal gl mand/ [g]<br>sub., rt/BWt<br>(%)     | Mean  | 0.09526  | 0.09554  | 0.08060  | 0.08531   |
|                                             | SD    | 0.019489 | 0.018216 | 0.024590 | 0.026535  |
|                                             | N     | 5        | 5        | 5        | 5         |
|                                             | %Diff | -        | 0.3      | -15.4    | -10.5     |
| Sal gl mand/ [g]<br>sub.,rt/BrWt<br>(ratio) | Mean  | 0.11588  | 0.10937  | 0.09307  | 0.10100   |
|                                             | SD    | 0.027197 | 0.020035 | 0.029131 | 0.034642  |
|                                             | N     | 5        | 5        | 5        | 5         |
|                                             | %Diff | -        | -5.6     | -19.7    | -12.8     |
| Spleen [g]<br>(g)                           | Mean  | 0.5366   | 0.5058   | 0.5566   | 0.6330    |
|                                             | SD    | 0.07379  | 0.05054  | 0.15856  | 0.08507   |
|                                             | N     | 5        | 5        | 5        | 5         |
|                                             | %Diff | -        | -5.7     | 3.7      | 18.0      |
| Spleen/BWt [g]<br>(%)                       | Mean  | 0.22589  | 0.23585  | 0.25354  | 0.28583   |
|                                             | SD    | 0.037756 | 0.027947 | 0.052836 | 0.029633  |
|                                             | N     | 5        | 5        | 5        | 5         |
|                                             | %Diff | -        | 4.4      | 12.2     | 26.5      |

[g] - Anova &amp; Dunnett

2759-001  
A Single Dose Toxicity Study of Test Article Administered by Intrathecal Injection in RatsSummary of Organ Weight Values  
Day 29

Day: 29 Relative to Start Date

| Sex: Female                                 |       | Vehicle  | Low Dose | Mid Dose | High Dose |
|---------------------------------------------|-------|----------|----------|----------|-----------|
| Spleen/BrWt [g]<br>(ratio)                  | Mean  | 0.27355  | 0.27058  | 0.29524  | 0.33191   |
|                                             | SD    | 0.044595 | 0.033330 | 0.074004 | 0.040895  |
|                                             | N     | 5        | 5        | 5        | 5         |
|                                             | %Diff | -        | -1.1     | 7.9      | 21.3      |
| Thymus [g]<br>(g)                           | Mean  | 0.4512   | 0.3686   | 0.3476   | 0.4470    |
|                                             | SD    | 0.08675  | 0.07555  | 0.09032  | 0.18239   |
|                                             | N     | 5        | 5        | 5        | 5         |
|                                             | %Diff | -        | -18.3    | -23.0    | -0.9      |
| Thymus/BWt [g]<br>(%)                       | Mean  | 0.18792  | 0.17170  | 0.16056  | 0.19801   |
|                                             | SD    | 0.029214 | 0.037128 | 0.037330 | 0.062958  |
|                                             | N     | 5        | 5        | 5        | 5         |
|                                             | %Diff | -        | -8.6     | -14.6    | 5.4       |
| Thymus/BrWt [g]<br>(ratio)                  | Mean  | 0.22906  | 0.19683  | 0.18590  | 0.23545   |
|                                             | SD    | 0.043509 | 0.040869 | 0.047051 | 0.097880  |
|                                             | N     | 5        | 5        | 5        | 5         |
|                                             | %Diff | -        | -14.1    | -18.8    | 2.8       |
| Thyroid/para [g]<br>(fixed)<br>(g)          | Mean  | 0.02030  | 0.02036  | 0.02124  | 0.01968   |
|                                             | SD    | 0.003706 | 0.002610 | 0.002028 | 0.002149  |
|                                             | N     | 5        | 5        | 5        | 5         |
|                                             | %Diff | -        | 0.3      | 4.6      | -3.1      |
| Thyroid/para [g]<br>(fixed)/BWt<br>(%)      | Mean  | 0.00848  | 0.00956  | 0.00990  | 0.00887   |
|                                             | SD    | 0.001273 | 0.001805 | 0.001551 | 0.000231  |
|                                             | N     | 5        | 5        | 5        | 5         |
|                                             | %Diff | -        | 12.8     | 16.8     | 4.6       |
| Thyroid/para [g]<br>(fixed)/BrWt<br>(ratio) | Mean  | 0.01029  | 0.01091  | 0.01138  | 0.01033   |
|                                             | SD    | 0.001663 | 0.001719 | 0.001346 | 0.001146  |
|                                             | N     | 5        | 5        | 5        | 5         |
|                                             | %Diff | -        | 6.1      | 10.7     | 0.5       |
| Uterus w/<br>cervix<br>(g)                  | Mean  | 0.5414   | 0.5708   | 0.5760   | 0.5394    |
|                                             | SD    | 0.09542  | 0.09218  | 0.16120  | 0.06286   |
|                                             | N     | 5        | 5        | 5        | 5         |
|                                             | %Diff | -        | 5.4      | 6.4      | -0.4      |

[g] - Anova &amp; Dunnett

2759-001  
 A Single Dose Toxicity Study of Test Article Administered by Intrathecal Injection in Rats

Summary of Organ Weight Values  
 Day 29

Day: 29 Relative to Start Date

| Sex: Female                             |       | Vehicle  | Low Dose | Mid Dose | High Dose |
|-----------------------------------------|-------|----------|----------|----------|-----------|
| Uterus w/ [g]<br>cervix/BWt<br>(%)      | Mean  | 0.22805  | 0.26549  | 0.26999  | 0.24475   |
|                                         | SD    | 0.047512 | 0.042177 | 0.095123 | 0.034244  |
|                                         | N     | 5        | 5        | 5        | 5         |
|                                         | %Diff | -        | 16.4     | 18.4     | 7.3       |
| Uterus w/ [g]<br>cervix/BrWt<br>(ratio) | Mean  | 0.27613  | 0.30467  | 0.31008  | 0.28298   |
|                                         | SD    | 0.055558 | 0.047706 | 0.099569 | 0.030952  |
|                                         | N     | 5        | 5        | 5        | 5         |
|                                         | %Diff | -        | 10.3     | 12.3     | 2.5       |

[g] - Anova & Dunnett

**Table 6**  
**Summary of Organ Weight Values (Day 91)**

2759-001  
A Single Dose Toxicity Study of Test Article Administered by Intrathecal Injection in RatsSummary of Organ Weight Values  
Day 91

Day: 91 Relative to Start Date

| Sex: Male                          |       | Vehicle  | Low Dose | Mid Dose | High Dose |
|------------------------------------|-------|----------|----------|----------|-----------|
| Body [g]<br>Weight<br>(g)          | Mean  | 508.2    | 500.4    | 551.0    | 534.0     |
|                                    | SD    | 20.45    | 55.76    | 50.14    | 132.37    |
|                                    | N     | 5        | 5        | 5        | 5         |
|                                    | %Diff | -        | -1.5     | 8.4      | 5.1       |
| Brain [g]<br>(g)                   | Mean  | 2.1732   | 2.1428   | 2.1038   | 2.1218    |
|                                    | SD    | 0.12996  | 0.08089  | 0.05134  | 0.06196   |
|                                    | N     | 5        | 5        | 5        | 5         |
|                                    | %Diff | -        | -1.4     | -3.2     | -2.4      |
| Brain/BWt [g1]<br>(%)              | Mean  | 0.42858  | 0.43242  | 0.38477  | 0.42392   |
|                                    | SD    | 0.036599 | 0.049288 | 0.041431 | 0.138586  |
|                                    | N     | 5        | 5        | 5        | 5         |
|                                    | %Diff | -        | 0.9      | -10.2    | -1.1      |
| Adrenal [g]<br>glands<br>(g)       | Mean  | 0.0684   | 0.0644   | 0.0704   | 0.0682    |
|                                    | SD    | 0.01609  | 0.01521  | 0.01592  | 0.01165   |
|                                    | N     | 5        | 5        | 5        | 5         |
|                                    | %Diff | -        | -5.8     | 2.9      | -0.3      |
| Adrenal gl/ [g]<br>BWt<br>(%)      | Mean  | 0.01343  | 0.01275  | 0.01304  | 0.01322   |
|                                    | SD    | 0.002919 | 0.001706 | 0.004107 | 0.002814  |
|                                    | N     | 5        | 5        | 5        | 5         |
|                                    | %Diff | -        | -5.1     | -2.9     | -1.5      |
| Adrenal gl/ [g]<br>BrWt<br>(ratio) | Mean  | 0.03192  | 0.03011  | 0.03336  | 0.03220   |
|                                    | SD    | 0.009501 | 0.007471 | 0.006840 | 0.005873  |
|                                    | N     | 5        | 5        | 5        | 5         |
|                                    | %Diff | -        | -5.7     | 4.5      | 0.9       |
| Epididymides [g]<br>(g)            | Mean  | 1.5482   | 1.5656   | 1.5358   | 1.4766    |
|                                    | SD    | 0.16960  | 0.05978  | 0.08808  | 0.08587   |
|                                    | N     | 5        | 5        | 5        | 5         |
|                                    | %Diff | -        | 1.1      | -0.8     | -4.6      |
| Epididymides [g]<br>/BWt<br>(%)    | Mean  | 0.30483  | 0.31568  | 0.28096  | 0.29061   |
|                                    | SD    | 0.032541 | 0.033072 | 0.033704 | 0.071974  |
|                                    | N     | 5        | 5        | 5        | 5         |
|                                    | %Diff | -        | 3.6      | -7.8     | -4.7      |

[g] - Anova &amp; Dunnett

[g1] - Anova &amp; Dunnett(Log)

2759-001  
A Single Dose Toxicity Study of Test Article Administered by Intrathecal Injection in RatsSummary of Organ Weight Values  
Day 91

Day: 91 Relative to Start Date

| Sex: Male                            |       | Vehicle  | Low Dose | Mid Dose | High Dose |
|--------------------------------------|-------|----------|----------|----------|-----------|
| Epididymides [g]<br>/BrWt<br>(ratio) | Mean  | 0.71776  | 0.73114  | 0.72995  | 0.69699   |
|                                      | SD    | 0.120357 | 0.030310 | 0.035999 | 0.055127  |
|                                      | N     | 5        | 5        | 5        | 5         |
|                                      | %Diff | -        | 1.9      | 1.7      | -2.9      |
| Heart [g]<br>(g)                     | Mean  | 1.6768   | 1.8614   | 1.9036   | 2.0814    |
|                                      | SD    | 0.13245  | 0.25011  | 0.22000  | 0.33516   |
|                                      | N     | 5        | 5        | 5        | 5         |
|                                      | %Diff | -        | 11.0     | 13.5     | 24.1      |
| Heart/BWt [g]<br>(%)                 | Mean  | 0.33035  | 0.37288  | 0.34617  | 0.40038   |
|                                      | SD    | 0.029647 | 0.040620 | 0.033627 | 0.062450  |
|                                      | N     | 5        | 5        | 5        | 5         |
|                                      | %Diff | -        | 12.9     | 4.8      | 21.2      |
| Heart/BrWt [g]<br>(ratio)            | Mean  | 0.77573  | 0.87012  | 0.90694  | 0.98185   |
|                                      | SD    | 0.098348 | 0.127309 | 0.123553 | 0.161885  |
|                                      | N     | 5        | 5        | 5        | 5         |
|                                      | %Diff | -        | 12.2     | 16.9     | 26.6      |
| Kidneys [g]<br>(g)                   | Mean  | 3.8454   | 3.6118   | 4.0230   | 3.8416    |
|                                      | SD    | 0.13649  | 0.51406  | 0.62132  | 0.40699   |
|                                      | N     | 5        | 5        | 5        | 5         |
|                                      | %Diff | -        | -6.1     | 4.6      | -0.1      |
| Kidneys/BWt [g1]<br>(%)              | Mean  | 0.75716  | 0.72011  | 0.73159  | 0.75886   |
|                                      | SD    | 0.026784 | 0.033184 | 0.097832 | 0.227445  |
|                                      | N     | 5        | 5        | 5        | 5         |
|                                      | %Diff | -        | -4.9     | -3.4     | 0.2       |
| Kidneys/BrWt [g]<br>(ratio)          | Mean  | 1.77363  | 1.68631  | 1.91387  | 1.80877   |
|                                      | SD    | 0.106193 | 0.242608 | 0.305429 | 0.165194  |
|                                      | N     | 5        | 5        | 5        | 5         |
|                                      | %Diff | -        | -4.9     | 7.9      | 2.0       |
| Liver [g]<br>(g)                     | Mean  | 15.2390  | 15.3124  | 17.1628  | 17.5508   |
|                                      | SD    | 0.44115  | 2.87372  | 1.57775  | 2.31615   |
|                                      | N     | 5        | 5        | 5        | 5         |
|                                      | %Diff | -        | 0.5      | 12.6     | 15.2      |

[g] - Anova &amp; Dunnett

[g1] - Kruskal-Wallis &amp; Dunn

2759-001  
A Single Dose Toxicity Study of Test Article Administered by Intrathecal Injection in RatsSummary of Organ Weight Values  
Day 91

Day: 91 Relative to Start Date

| Sex: Male                                 |       | Vehicle  | Low Dose | Mid Dose | High Dose |
|-------------------------------------------|-------|----------|----------|----------|-----------|
| Liver/BWt [g]<br>(%)                      | Mean  | 2.99991  | 3.04019  | 3.12305  | 3.44683   |
|                                           | SD    | 0.050338 | 0.236575 | 0.251397 | 0.968213  |
|                                           | N     | 5        | 5        | 5        | 5         |
|                                           | %Diff | -        | 1.3      | 4.1      | 14.9      |
| Liver/BrWt [g1]<br>(ratio)                | Mean  | 7.04028  | 7.16064  | 8.16865  | 8.26825   |
|                                           | SD    | 0.605413 | 1.429703 | 0.853643 | 1.058828  |
|                                           | N     | 5        | 5        | 5        | 5         |
|                                           | %Diff | -        | 1.7      | 16.0     | 17.4      |
| Lung [g2]<br>(g)                          | Mean  | 1.8658   | 2.1060   | 2.2704   | 2.0682    |
|                                           | SD    | 0.12817  | 0.27309  | 0.53860  | 0.39574   |
|                                           | N     | 5        | 5        | 5        | 5         |
|                                           | %Diff | -        | 12.9     | 21.7     | 10.8      |
| Lung/BWt [g1]<br>(%)                      | Mean  | 0.36752  | 0.42116  | 0.41067  | 0.40595   |
|                                           | SD    | 0.027236 | 0.034994 | 0.074719 | 0.111184  |
|                                           | N     | 5        | 5        | 5        | 5         |
|                                           | %Diff | -        | 14.6     | 11.7     | 10.5      |
| Lung/BrWt [g2]<br>(ratio)                 | Mean  | 0.86108  | 0.98337  | 1.08292  | 0.97656   |
|                                           | SD    | 0.079163 | 0.131459 | 0.277082 | 0.194776  |
|                                           | N     | 5        | 5        | 5        | 5         |
|                                           | %Diff | -        | 14.2     | 25.8     | 13.4      |
| Pituitary [g1]<br>(fixed)<br>(g)          | Mean  | 0.01802  | 0.01654  | 0.01784  | 0.01622   |
|                                           | SD    | 0.001134 | 0.002339 | 0.001481 | 0.002139  |
|                                           | N     | 5        | 5        | 5        | 5         |
|                                           | %Diff | -        | -8.2     | -1.0     | -10.0     |
| Pituitary [g]<br>(fixed)/BWt<br>(%)       | Mean  | 0.00355  | 0.00330  | 0.00325  | 0.00327   |
|                                           | SD    | 0.000319 | 0.000299 | 0.000228 | 0.001279  |
|                                           | N     | 5        | 5        | 5        | 5         |
|                                           | %Diff | -        | -7.1     | -8.7     | -8.0      |
| Pituitary [g1]<br>(fixed)/BrWt<br>(ratio) | Mean  | 0.00830  | 0.00772  | 0.00849  | 0.00763   |
|                                           | SD    | 0.000451 | 0.001115 | 0.000829 | 0.000813  |
|                                           | N     | 5        | 5        | 5        | 5         |
|                                           | %Diff | -        | -7.0     | 2.3      | -8.1      |

[g] - Kruskal-Wallis & Dunn  
[g1] - Anova & Dunnett  
[g2] - Anova & Dunnett(Log)



2759-001  
A Single Dose Toxicity Study of Test Article Administered by Intrathecal Injection in RatsSummary of Organ Weight Values  
Day 91

Day: 91 Relative to Start Date

| Sex: Male                                   |       | Vehicle  | Low Dose | Mid Dose | High Dose |
|---------------------------------------------|-------|----------|----------|----------|-----------|
| Prostate [g]<br>gland<br>(g)                | Mean  | 1.6784   | 1.3944   | 1.5052   | 1.5304    |
|                                             | SD    | 0.23836  | 0.20146  | 0.30886  | 0.28067   |
|                                             | N     | 5        | 5        | 5        | 5         |
|                                             | %Diff | -        | -16.9    | -10.3    | -8.8      |
| Prostate [g]<br>gland/BWt<br>(%)            | Mean  | 0.33187  | 0.28077  | 0.27567  | 0.29537   |
|                                             | SD    | 0.057681 | 0.046175 | 0.064562 | 0.057875  |
|                                             | N     | 5        | 5        | 5        | 5         |
|                                             | %Diff | -        | -15.4    | -16.9    | -11.0     |
| Prostate [g]<br>gland/BrWt<br>(ratio)       | Mean  | 0.77251  | 0.64885  | 0.71391  | 0.72198   |
|                                             | SD    | 0.098936 | 0.072419 | 0.133755 | 0.135186  |
|                                             | N     | 5        | 5        | 5        | 5         |
|                                             | %Diff | -        | -16.0    | -7.6     | -6.5      |
| Sal, mand/ [g]<br>sub., rt<br>(g)           | Mean  | 0.3566   | 0.3576   | 0.4096   | 0.3880    |
|                                             | SD    | 0.01936  | 0.02903  | 0.08325  | 0.07150   |
|                                             | N     | 5        | 5        | 5        | 5         |
|                                             | %Diff | -        | 0.3      | 14.9     | 8.8       |
| Sal gl mand/ [g1]<br>sub., rt/BWt<br>(%)    | Mean  | 0.07031  | 0.07189  | 0.07543  | 0.07934   |
|                                             | SD    | 0.005688 | 0.006951 | 0.018717 | 0.039000  |
|                                             | N     | 5        | 5        | 5        | 5         |
|                                             | %Diff | -        | 2.2      | 7.3      | 12.8      |
| Sal gl mand/ [g]<br>sub.,rt/BrWt<br>(ratio) | Mean  | 0.16480  | 0.16699  | 0.19445  | 0.18239   |
|                                             | SD    | 0.016507 | 0.014067 | 0.038246 | 0.029834  |
|                                             | N     | 5        | 5        | 5        | 5         |
|                                             | %Diff | -        | 1.3      | 18.0     | 10.7      |
| Spleen [g]<br>(g)                           | Mean  | 0.8580   | 0.8326   | 0.8836   | 1.0106    |
|                                             | SD    | 0.15733  | 0.07911  | 0.07597  | 0.05000   |
|                                             | N     | 5        | 5        | 5        | 5         |
|                                             | %Diff | -        | -3.0     | 3.0      | 17.8      |
| Spleen/BWt [g1]<br>(%)                      | Mean  | 0.16895  | 0.16676  | 0.16173  | 0.20216   |
|                                             | SD    | 0.030605 | 0.008467 | 0.023922 | 0.068593  |
|                                             | N     | 5        | 5        | 5        | 5         |
|                                             | %Diff | -        | -1.3     | -4.3     | 19.7      |

[g] - Anova &amp; Dunnett

[g1] - Anova &amp; Dunnett(Log)

2759-001  
A Single Dose Toxicity Study of Test Article Administered by Intrathecal Injection in RatsSummary of Organ Weight Values  
Day 91

Day: 91 Relative to Start Date

| Sex: Male                          |       | Vehicle  | Low Dose | Mid Dose | High Dose |
|------------------------------------|-------|----------|----------|----------|-----------|
| Spleen/BrWt [g]<br>(ratio)         | Mean  | 0.39739  | 0.38912  | 0.41961  | 0.47609   |
|                                    | SD    | 0.084486 | 0.041297 | 0.028138 | 0.011588  |
|                                    | N     | 5        | 5        | 5        | 5         |
|                                    | %Diff | -        | -2.1     | 5.6      | 19.8      |
| Testes [g]<br>(g)                  | Mean  | 3.6970   | 3.6838   | 3.6718   | 3.4820    |
|                                    | SD    | 0.04958  | 0.08258  | 0.30679  | 0.24092   |
|                                    | N     | 5        | 5        | 5        | 5         |
|                                    | %Diff | -        | -0.4     | -0.7     | -5.8      |
| Testes/BWt [g1]<br>(%)             | Mean  | 0.72862  | 0.74394  | 0.66849  | 0.69060   |
|                                    | SD    | 0.036452 | 0.089026 | 0.051406 | 0.202527  |
|                                    | N     | 5        | 5        | 5        | 5         |
|                                    | %Diff | -        | 2.1      | -8.3     | -5.2      |
| Testes/BrWt [g]<br>(ratio)         | Mean  | 1.70526  | 1.72110  | 1.74672  | 1.64307   |
|                                    | SD    | 0.086322 | 0.075038 | 0.159070 | 0.136964  |
|                                    | N     | 5        | 5        | 5        | 5         |
|                                    | %Diff | -        | 0.9      | 2.4      | -3.6      |
| Thymus [g]<br>(g)                  | Mean  | 0.2446   | 0.2764   | 0.3592   | 0.4026 a  |
|                                    | SD    | 0.05111  | 0.08809  | 0.06843  | 0.11032   |
|                                    | N     | 5        | 5        | 5        | 5         |
|                                    | %Diff | -        | 13.0     | 46.9     | 64.6      |
| Thymus/BWt [g]<br>(%)              | Mean  | 0.04827  | 0.05532  | 0.06576  | 0.07531 a |
|                                    | SD    | 0.010682 | 0.018076 | 0.014221 | 0.006341  |
|                                    | N     | 5        | 5        | 5        | 5         |
|                                    | %Diff | -        | 14.6     | 36.2     | 56.0      |
| Thymus/BrWt [g]<br>(ratio)         | Mean  | 0.11193  | 0.13002  | 0.17097  | 0.19041 a |
|                                    | SD    | 0.018511 | 0.044300 | 0.034049 | 0.054243  |
|                                    | N     | 5        | 5        | 5        | 5         |
|                                    | %Diff | -        | 16.2     | 52.7     | 70.1      |
| Thyroid/para [g]<br>(fixed)<br>(g) | Mean  | 0.02832  | 0.02620  | 0.03274  | 0.03060   |
|                                    | SD    | 0.007585 | 0.006719 | 0.005847 | 0.004552  |
|                                    | N     | 5        | 5        | 5        | 5         |
|                                    | %Diff | -        | -7.5     | 15.6     | 8.1       |

[g] - Anova & Dunnett: a = p < 0.05  
[g1] - Anova & Dunnett(Log)

2759-001  
 A Single Dose Toxicity Study of Test Article Administered by Intrathecal Injection in Rats

Summary of Organ Weight Values  
 Day 91

Day: 91 Relative to Start Date

| Sex: Male                                   |       | Vehicle  | Low Dose | Mid Dose | High Dose |
|---------------------------------------------|-------|----------|----------|----------|-----------|
| Thyroid/para [g]<br>(fixed)/Bwt<br>(%)      | Mean  | 0.00558  | 0.00519  | 0.00596  | 0.00610   |
|                                             | SD    | 0.001479 | 0.000888 | 0.001030 | 0.002108  |
|                                             | N     | 5        | 5        | 5        | 5         |
|                                             | %Diff | -        | -6.9     | 6.8      | 9.4       |
| Thyroid/para [g]<br>(fixed)/BrWt<br>(ratio) | Mean  | 0.01305  | 0.01226  | 0.01555  | 0.01440   |
|                                             | SD    | 0.003425 | 0.003376 | 0.002642 | 0.001872  |
|                                             | N     | 5        | 5        | 5        | 5         |
|                                             | %Diff | -        | -6.0     | 19.2     | 10.4      |

[g] - Anova & Dunnett

2759-001  
A Single Dose Toxicity Study of Test Article Administered by Intrathecal Injection in RatsSummary of Organ Weight Values  
Day 91

Day: 91 Relative to Start Date

| Sex: Female                         |       | Vehicle  | Low Dose | Mid Dose | High Dose |
|-------------------------------------|-------|----------|----------|----------|-----------|
| Body [g]<br>Weight<br>(g)           | Mean  | 279.4    | 269.4    | 268.0    | 301.6     |
|                                     | SD    | 24.36    | 20.34    | 16.93    | 22.55     |
|                                     | N     | 5        | 5        | 5        | 5         |
|                                     | %Diff | -        | -3.6     | -4.1     | 7.9       |
| Brain [g1]<br>(g)                   | Mean  | 1.9340   | 1.9702   | 1.9778   | 1.9656    |
|                                     | SD    | 0.07522  | 0.11679  | 0.08732  | 0.12458   |
|                                     | N     | 5        | 5        | 5        | 5         |
|                                     | %Diff | -        | 1.9      | 2.3      | 1.6       |
| Brain/BWt [g]<br>(%)                | Mean  | 0.69638  | 0.73385  | 0.74064  | 0.65500   |
|                                     | SD    | 0.064947 | 0.056481 | 0.059909 | 0.067556  |
|                                     | N     | 5        | 5        | 5        | 5         |
|                                     | %Diff | -        | 5.4      | 6.4      | -5.9      |
| Adrenal [g]<br>glands<br>(g)        | Mean  | 0.0692   | 0.0686   | 0.0892   | 0.0866    |
|                                     | SD    | 0.00471  | 0.02314  | 0.01069  | 0.01718   |
|                                     | N     | 5        | 5        | 5        | 5         |
|                                     | %Diff | -        | -0.9     | 28.9     | 25.1      |
| Adrenal gl/ [g]<br>BWt<br>(%)       | Mean  | 0.02484  | 0.02549  | 0.03330  | 0.02887   |
|                                     | SD    | 0.001450 | 0.008270 | 0.003612 | 0.006116  |
|                                     | N     | 5        | 5        | 5        | 5         |
|                                     | %Diff | -        | 2.6      | 34.1     | 16.3      |
| Adrenal gl/ [g1]<br>BrWt<br>(ratio) | Mean  | 0.03578  | 0.03531  | 0.04507  | 0.04417   |
|                                     | SD    | 0.002024 | 0.013299 | 0.004585 | 0.009263  |
|                                     | N     | 5        | 5        | 5        | 5         |
|                                     | %Diff | -        | -1.3     | 26.0     | 23.5      |
| Heart [g]<br>(g)                    | Mean  | 1.1088   | 1.0782   | 1.2174   | 1.2134    |
|                                     | SD    | 0.14393  | 0.17517  | 0.15510  | 0.14135   |
|                                     | N     | 5        | 5        | 5        | 5         |
|                                     | %Diff | -        | -2.8     | 9.8      | 9.4       |
| Heart/BWt [g]<br>(%)                | Mean  | 0.39558  | 0.39860  | 0.45386  | 0.40209   |
|                                     | SD    | 0.019795 | 0.041390 | 0.046784 | 0.033933  |
|                                     | N     | 5        | 5        | 5        | 5         |
|                                     | %Diff | -        | 0.8      | 14.7     | 1.6       |

|                                                       |
|-------------------------------------------------------|
| [g] - Anova & Dunnett<br>[g1] - Kruskal-Wallis & Dunn |
|-------------------------------------------------------|

2759-001  
A Single Dose Toxicity Study of Test Article Administered by Intrathecal Injection in RatsSummary of Organ Weight Values  
Day 91

Day: 91 Relative to Start Date

| Sex: Female                 |       | Vehicle  | Low Dose | Mid Dose  | High Dose |
|-----------------------------|-------|----------|----------|-----------|-----------|
| Heart/BrWt [g]<br>(ratio)   | Mean  | 0.57314  | 0.54834  | 0.61596   | 0.61857   |
|                             | SD    | 0.070273 | 0.094040 | 0.077994  | 0.076488  |
|                             | N     | 5        | 5        | 5         | 5         |
|                             | %Diff | -        | -4.3     | 7.5       | 7.9       |
| Kidneys [g]<br>(g)          | Mean  | 2.0970   | 2.0984   | 2.2794    | 2.2132    |
|                             | SD    | 0.20841  | 0.20257  | 0.18649   | 0.16172   |
|                             | N     | 5        | 5        | 5         | 5         |
|                             | %Diff | -        | 0.1      | 8.7       | 5.5       |
| Kidneys/BWt [g]<br>(%)      | Mean  | 0.75043  | 0.77912  | 0.85187 a | 0.73477   |
|                             | SD    | 0.031474 | 0.048731 | 0.070786  | 0.041229  |
|                             | N     | 5        | 5        | 5         | 5         |
|                             | %Diff | -        | 3.8      | 13.5      | -2.1      |
| Kidneys/BrWt [g]<br>(ratio) | Mean  | 1.08369  | 1.06542  | 1.15272   | 1.12883   |
|                             | SD    | 0.092010 | 0.087166 | 0.083214  | 0.101166  |
|                             | N     | 5        | 5        | 5         | 5         |
|                             | %Diff | -        | -1.7     | 6.4       | 4.2       |
| Liver [g]<br>(g)            | Mean  | 9.6278   | 9.0286   | 9.1702    | 10.2726   |
|                             | SD    | 1.38025  | 1.05431  | 0.68846   | 1.42472   |
|                             | N     | 5        | 5        | 5         | 5         |
|                             | %Diff | -        | -6.2     | -4.8      | 6.7       |
| Liver/BWt [g]<br>(%)        | Mean  | 3.45445  | 3.34374  | 3.42146   | 3.40889   |
|                             | SD    | 0.454562 | 0.164389 | 0.135833  | 0.398309  |
|                             | N     | 5        | 5        | 5         | 5         |
|                             | %Diff | -        | -3.2     | -1.0      | -1.3      |
| Liver/BrWt [g]<br>(ratio)   | Mean  | 4.96843  | 4.58494  | 4.64585   | 5.24076   |
|                             | SD    | 0.586933 | 0.503257 | 0.441351  | 0.801606  |
|                             | N     | 5        | 5        | 5         | 5         |
|                             | %Diff | -        | -7.7     | -6.5      | 5.5       |
| Lung [g]<br>(g)             | Mean  | 1.4068   | 1.3680   | 1.4428    | 1.4982    |
|                             | SD    | 0.14535  | 0.17428  | 0.11743   | 0.17678   |
|                             | N     | 5        | 5        | 5         | 5         |
|                             | %Diff | -        | -2.8     | 2.6       | 6.5       |

[g] - Anova &amp; Dunnett: a = p &lt; 0.05

2759-001  
A Single Dose Toxicity Study of Test Article Administered by Intrathecal Injection in RatsSummary of Organ Weight Values  
Day 91

Day: 91 Relative to Start Date

| Sex: Female                      |       | Vehicle  | Low Dose | Mid Dose | High Dose |
|----------------------------------|-------|----------|----------|----------|-----------|
| Lung/BWt [g]<br>(%)              | Mean  | 0.50421  | 0.50921  | 0.54032  | 0.50110   |
|                                  | SD    | 0.038092 | 0.067727 | 0.057271 | 0.087730  |
|                                  | N     | 5        | 5        | 5        | 5         |
|                                  | %Diff | -        | 1.0      | 7.2      | -0.6      |
| Lung/BrWt [g]<br>(ratio)         | Mean  | 0.72748  | 0.69479  | 0.72876  | 0.76582   |
|                                  | SD    | 0.071245 | 0.083475 | 0.033356 | 0.110981  |
|                                  | N     | 5        | 5        | 5        | 5         |
|                                  | %Diff | -        | -4.5     | 0.2      | 5.3       |
| Ovaries [g]<br>(g)               | Mean  | 0.0868   | 0.0770   | 0.0896   | 0.1008    |
|                                  | SD    | 0.03065  | 0.01483  | 0.01778  | 0.00363   |
|                                  | N     | 5        | 5        | 5        | 5         |
|                                  | %Diff | -        | -11.3    | 3.2      | 16.1      |
| Ovaries/BWt [g]<br>(%)           | Mean  | 0.03114  | 0.02864  | 0.03372  | 0.03360   |
|                                  | SD    | 0.010404 | 0.005201 | 0.007554 | 0.003069  |
|                                  | N     | 5        | 5        | 5        | 5         |
|                                  | %Diff | -        | -8.0     | 8.3      | 7.9       |
| Ovaries/BrWt [g]<br>(ratio)      | Mean  | 0.04482  | 0.03888  | 0.04508  | 0.05144   |
|                                  | SD    | 0.015287 | 0.005157 | 0.007282 | 0.003585  |
|                                  | N     | 5        | 5        | 5        | 5         |
|                                  | %Diff | -        | -13.2    | 0.6      | 14.8      |
| Oviducts [g]<br>(g)              | Mean  | 0.0302   | 0.0238   | 0.0320   | 0.0334    |
|                                  | SD    | 0.01038  | 0.00955  | 0.00529  | 0.01014   |
|                                  | N     | 5        | 5        | 5        | 5         |
|                                  | %Diff | -        | -21.2    | 6.0      | 10.6      |
| Oviducts/BWt [g]<br>(%)          | Mean  | 0.01073  | 0.00907  | 0.01203  | 0.01126   |
|                                  | SD    | 0.003253 | 0.004469 | 0.002459 | 0.003903  |
|                                  | N     | 5        | 5        | 5        | 5         |
|                                  | %Diff | -        | -15.4    | 12.2     | 5.0       |
| Oviducts/ [g]<br>BrWt<br>(ratio) | Mean  | 0.01571  | 0.01223  | 0.01618  | 0.01698   |
|                                  | SD    | 0.005609 | 0.005330 | 0.002600 | 0.005156  |
|                                  | N     | 5        | 5        | 5        | 5         |
|                                  | %Diff | -        | -22.2    | 3.0      | 8.0       |

[g] - Anova &amp; Dunnett

2759-001  
A Single Dose Toxicity Study of Test Article Administered by Intrathecal Injection in RatsSummary of Organ Weight Values  
Day 91

Day: 91 Relative to Start Date

| Sex: Female                                 |       | Vehicle  | Low Dose | Mid Dose | High Dose |
|---------------------------------------------|-------|----------|----------|----------|-----------|
| Pituitary [g]<br>(fixed)<br>(g)             | Mean  | 0.02224  | 0.02104  | 0.02556  | 0.02484   |
|                                             | SD    | 0.004459 | 0.005414 | 0.004433 | 0.001982  |
|                                             | N     | 5        | 5        | 5        | 5         |
|                                             | %Diff | -        | -5.4     | 14.9     | 11.7      |
| Pituitary [g]<br>(fixed)/BWt<br>(%)         | Mean  | 0.00794  | 0.00786  | 0.00951  | 0.00827   |
|                                             | SD    | 0.001264 | 0.002143 | 0.001198 | 0.000853  |
|                                             | N     | 5        | 5        | 5        | 5         |
|                                             | %Diff | -        | -1.0     | 19.7     | 4.1       |
| Pituitary [g]<br>(fixed)/BrWt<br>(ratio)    | Mean  | 0.01148  | 0.01072  | 0.01301  | 0.01269   |
|                                             | SD    | 0.002128 | 0.002893 | 0.002773 | 0.001447  |
|                                             | N     | 5        | 5        | 5        | 5         |
|                                             | %Diff | -        | -6.6     | 13.3     | 10.6      |
| Sal, mand/ [g]<br>sub., rt<br>(g)           | Mean  | 0.2134   | 0.2100   | 0.2288   | 0.2338    |
|                                             | SD    | 0.02142  | 0.03040  | 0.03050  | 0.04503   |
|                                             | N     | 5        | 5        | 5        | 5         |
|                                             | %Diff | -        | -1.6     | 7.2      | 9.6       |
| Sal gl mand/ [g]<br>sub., rt/BWt<br>(%)     | Mean  | 0.07655  | 0.07789  | 0.08567  | 0.07799   |
|                                             | SD    | 0.006669 | 0.008621 | 0.013178 | 0.017359  |
|                                             | N     | 5        | 5        | 5        | 5         |
|                                             | %Diff | -        | 1.8      | 11.9     | 1.9       |
| Sal gl mand/ [g]<br>sub.,rt/BrWt<br>(ratio) | Mean  | 0.11017  | 0.10649  | 0.11588  | 0.11988   |
|                                             | SD    | 0.007415 | 0.013104 | 0.016458 | 0.026555  |
|                                             | N     | 5        | 5        | 5        | 5         |
|                                             | %Diff | -        | -3.3     | 5.2      | 8.8       |
| Spleen [g]<br>(g)                           | Mean  | 0.5186   | 0.5074   | 0.5834   | 0.6432 a  |
|                                             | SD    | 0.05136  | 0.08911  | 0.07097  | 0.08159   |
|                                             | N     | 5        | 5        | 5        | 5         |
|                                             | %Diff | -        | -2.2     | 12.5     | 24.0      |
| Spleen/BWt [g]<br>(%)                       | Mean  | 0.18600  | 0.18823  | 0.21860  | 0.21308   |
|                                             | SD    | 0.015170 | 0.029146 | 0.031303 | 0.020803  |
|                                             | N     | 5        | 5        | 5        | 5         |
|                                             | %Diff | -        | 1.2      | 17.5     | 14.6      |

[g] - Anova &amp; Dunnett: a = p &lt; 0.05

2759-001  
A Single Dose Toxicity Study of Test Article Administered by Intrathecal Injection in RatsSummary of Organ Weight Values  
Day 91

Day: 91 Relative to Start Date

| Sex: Female                                  |       | Vehicle  | Low Dose | Mid Dose | High Dose |
|----------------------------------------------|-------|----------|----------|----------|-----------|
| Spleen/BrWt [g]<br>(ratio)                   | Mean  | 0.26797  | 0.25652  | 0.29435  | 0.32886   |
|                                              | SD    | 0.022367 | 0.033563 | 0.025377 | 0.051517  |
|                                              | N     | 5        | 5        | 5        | 5         |
|                                              | %Diff | -        | -4.3     | 9.8      | 22.7      |
| Thymus [g]<br>(g)                            | Mean  | 0.3020   | 0.2810   | 0.2938   | 0.3246    |
|                                              | SD    | 0.06525  | 0.06778  | 0.02879  | 0.09255   |
|                                              | N     | 5        | 5        | 5        | 5         |
|                                              | %Diff | -        | -7.0     | -2.7     | 7.5       |
| Thymus/BWt [g1]<br>(%)                       | Mean  | 0.10784  | 0.10350  | 0.10954  | 0.10646   |
|                                              | SD    | 0.019946 | 0.019507 | 0.006775 | 0.024071  |
|                                              | N     | 5        | 5        | 5        | 5         |
|                                              | %Diff | -        | -4.0     | 1.6      | -1.3      |
| Thymus/BrWt<br>(ratio)                       | Mean  | 0.15658  | 0.14302  | 0.14888  | 0.16651   |
|                                              | SD    | 0.036496 | 0.036170 | 0.017614 | 0.052524  |
|                                              | N     | 5        | 5        | 5        | 5         |
|                                              | %Diff | -        | -8.7     | -4.9     | 6.3       |
| Thyroid/para [g1]<br>(fixed)<br>(g)          | Mean  | 0.02200  | 0.02138  | 0.02096  | 0.02656   |
|                                              | SD    | 0.004147 | 0.002491 | 0.002082 | 0.003196  |
|                                              | N     | 5        | 5        | 5        | 5         |
|                                              | %Diff | -        | -2.8     | -4.7     | 20.7      |
| Thyroid/para [g1]<br>(fixed)/BWt<br>(%)      | Mean  | 0.00793  | 0.00793  | 0.00784  | 0.00882   |
|                                              | SD    | 0.001663 | 0.000594 | 0.000831 | 0.000952  |
|                                              | N     | 5        | 5        | 5        | 5         |
|                                              | %Diff | -        | 0.0      | -1.2     | 11.2      |
| Thyroid/para [g1]<br>(fixed)/BrWt<br>(ratio) | Mean  | 0.01134  | 0.01088  | 0.01058  | 0.01360   |
|                                              | SD    | 0.001771 | 0.001432 | 0.000685 | 0.002204  |
|                                              | N     | 5        | 5        | 5        | 5         |
|                                              | %Diff | -        | -4.1     | -6.7     | 19.9      |
| Uterus w/ [g]<br>cervix<br>(g)               | Mean  | 0.5562   | 0.6014   | 0.8336   | 0.6446    |
|                                              | SD    | 0.05261  | 0.16852  | 0.29609  | 0.08454   |
|                                              | N     | 5        | 5        | 5        | 5         |
|                                              | %Diff | -        | 8.1      | 49.9     | 15.9      |

|                            |
|----------------------------|
| [g] - Anova & Dunnett(Log) |
| [g1] - Anova & Dunnett     |



2759-001  
A Single Dose Toxicity Study of Test Article Administered by Intrathecal Injection in RatsSummary of Organ Weight Values  
Day 91

Day: 91 Relative to Start Date

| Sex: Female                             |       | Vehicle  | Low Dose | Mid Dose | High Dose |
|-----------------------------------------|-------|----------|----------|----------|-----------|
| Uterus w/ [g]<br>cervix/BWt<br>(%)      | Mean  | 0.20062  | 0.22243  | 0.31484  | 0.21360   |
|                                         | SD    | 0.028173 | 0.055693 | 0.122672 | 0.020472  |
|                                         | N     | 5        | 5        | 5        | 5         |
|                                         | %Diff | -        | 10.9     | 56.9     | 6.5       |
| Uterus w/ [g]<br>cervix/BrWt<br>(ratio) | Mean  | 0.28802  | 0.30737  | 0.42294  | 0.32980   |
|                                         | SD    | 0.030522 | 0.091937 | 0.150586 | 0.054956  |
|                                         | N     | 5        | 5        | 5        | 5         |
|                                         | %Diff | -        | 6.7      | 46.8     | 14.5      |

[g] - Anova &amp; Dunnett(Log)

**Table 7**  
**Summary of Microscopic Pathology Findings (Day 8)**

2759-001 - Summary of Microscopic Observations, Day 8

| Sex: Male<br><br>Number of Animals:             | Vehicle | Low Dose | Mid Dose | High Dose |
|-------------------------------------------------|---------|----------|----------|-----------|
|                                                 | SS      | SS       | SS       | SS        |
|                                                 | 5       | 5        | 5        | 5         |
| <b>brain</b>                                    |         |          |          |           |
| Examined                                        | 5       | 5        | 5        | 5         |
| No Visible Lesions                              | 5       | 5        | 5        | 5         |
| <b>dorsal root ganglia lumbar, right</b>        |         |          |          |           |
| Examined                                        | 5       | 5        | 5        | 5         |
| No Visible Lesions                              | 5       | 5        | 4        | 4         |
| infiltration, mononuclear cell,<br>perivascular | 0       | 0        | 1        | 1         |
| .... minimal                                    | 0       | 0        | 1        | 1         |
| <b>dorsal root ganglia, cervical, right</b>     |         |          |          |           |
| Examined                                        | 5       | 5        | 5        | 5         |
| No Visible Lesions                              | 5       | 5        | 5        | 5         |
| <b>dorsal root ganglia, thoracic, right</b>     |         |          |          |           |
| Examined                                        | 5       | 5        | 5        | 5         |
| No Visible Lesions                              | 5       | 5        | 5        | 5         |
| <b>heart</b>                                    |         |          |          |           |
| Examined                                        | 5       | 5        | 5        | 5         |
| No Visible Lesions                              | 5       | 5        | 5        | 4         |
| cardiomyopathy                                  | 0       | 0        | 0        | 1         |
| .... minimal                                    | 0       | 0        | 0        | 1         |
| <b>kidneys</b>                                  |         |          |          |           |
| Examined                                        | 5       | 5        | 5        | 5         |
| No Visible Lesions                              | 4       | 3        | 4        | 5         |
| infiltration, mononuclear cell                  | 1       | 1        | 0        | 0         |
| .... minimal                                    | 1       | 1        | 0        | 0         |
| mineralization                                  | 0       | 1        | 1        | 0         |
| .... minimal                                    | 0       | 1        | 1        | 0         |
| <b>liver</b>                                    |         |          |          |           |
| Examined                                        | 5       | 5        | 5        | 5         |
| No Visible Lesions                              | 4       | 3        | 0        | 3         |
| hemorrhage                                      | 0       | 0        | 1        | 0         |
| .... minimal                                    | 0       | 0        | 1        | 0         |
| infiltration, mononuclear cell                  | 1       | 2        | 4        | 2         |
| .... minimal                                    | 1       | 2        | 4        | 2         |

2759-001 - Summary of Microscopic Observations, Day 8

| Sex: Male<br><br>Number of Animals:          | Vehicle | Low Dose | Mid Dose | High Dose |
|----------------------------------------------|---------|----------|----------|-----------|
|                                              | SS      | SS       | SS       | SS        |
|                                              | 5       | 5        | 5        | 5         |
| <b>lung</b>                                  |         |          |          |           |
| Examined                                     | 5       | 5        | 5        | 5         |
| No Visible Lesions                           | 4       | 2        | 0        | 5         |
| hemorrhage                                   | 1       | 0        | 0        | 0         |
| .... minimal                                 | 1       | 0        | 0        | 0         |
| infiltration, mononuclear cell               | 0       | 3        | 4        | 0         |
| .... minimal                                 | 0       | 3        | 4        | 0         |
| macrophages, alveolar                        | 0       | 0        | 0        | 0         |
| .... minimal                                 | 0       | 0        | 0        | 0         |
| infiltration, mixed cell, perivascular       | 0       | 0        | 1        | 0         |
| .... minimal                                 | 0       | 0        | 1        | 0         |
| <b>lymph node, mandibular</b>                |         |          |          |           |
| Examined                                     | 5       | 4        | 5        | 5         |
| No Visible Lesions                           | 5       | 4        | 5        | 5         |
| <b>lymph node, mesenteric</b>                |         |          |          |           |
| Examined                                     | 5       | 5        | 5        | 5         |
| No Visible Lesions                           | 5       | 5        | 5        | 5         |
| <b>skeletal muscle, biceps femoris</b>       |         |          |          |           |
| Examined                                     | 5       | 5        | 5        | 5         |
| No Visible Lesions                           | 5       | 5        | 5        | 5         |
| <b>skeletal muscle, gastrocnemius</b>        |         |          |          |           |
| Examined                                     | 5       | 5        | 5        | 5         |
| No Visible Lesions                           | 5       | 5        | 5        | 5         |
| <b>spinal cord, cervical</b>                 |         |          |          |           |
| Examined                                     | 5       | 5        | 5        | 5         |
| No Visible Lesions                           | 5       | 5        | 5        | 5         |
| <b>spinal cord, lumbar</b>                   |         |          |          |           |
| Examined                                     | 5       | 5        | 5        | 5         |
| No Visible Lesions                           | 5       | 5        | 5        | 5         |
| gliosis                                      | 0       | 0        | 0        | 0         |
| .... minimal                                 | 0       | 0        | 0        | 0         |
| infiltration, mononuclear cell, perivascular | 0       | 0        | 0        | 0         |
| .... minimal                                 | 0       | 0        | 0        | 0         |

2759-001 - Summary of Microscopic Observations, Day 8

| Sex: Male<br><br>Number of Animals:             | Vehicle | Low Dose | Mid Dose | High Dose |
|-------------------------------------------------|---------|----------|----------|-----------|
|                                                 | SS      | SS       | SS       | SS        |
|                                                 | 5       | 5        | 5        | 5         |
| <b>spinal cord, thoracic</b>                    |         |          |          |           |
| Examined                                        | 5       | 5        | 5        | 5         |
| No Visible Lesions                              | 5       | 5        | 5        | 5         |
| gliosis                                         | 0       | 0        | 0        | 0         |
| .... minimal                                    | 0       | 0        | 0        | 0         |
| infiltration, mononuclear cell,<br>perivascular | 0       | 0        | 0        | 0         |
| .... minimal                                    | 0       | 0        | 0        | 0         |
| <b>spleen</b>                                   |         |          |          |           |
| Examined                                        | 5       | 5        | 5        | 5         |
| No Visible Lesions                              | 5       | 5        | 5        | 5         |
| depletion, lymphoid, marginal<br>zone           | 0       | 0        | 0        | 0         |
| .... minimal                                    | 0       | 0        | 0        | 0         |
| .... mild                                       | 0       | 0        | 0        | 0         |
| .... marked                                     | 0       | 0        | 0        | 0         |
| hyperplasia, lymphoid, follicular               | 0       | 0        | 0        | 0         |
| .... minimal                                    | 0       | 0        | 0        | 0         |
| <b>testes</b>                                   |         |          |          |           |
| Examined                                        | 5       | 5        | 5        | 5         |
| No Visible Lesions                              | 5       | 5        | 5        | 5         |
| <b>thymus</b>                                   |         |          |          |           |
| Examined                                        | 4       | 5        | 5        | 5         |
| No Visible Lesions                              | 4       | 4        | 4        | 4         |
| hemorrhage                                      | 0       | 1        | 1        | 1         |
| .... minimal                                    | 0       | 1        | 1        | 1         |
| <b>dorsal root ganglia, cervical, left</b>      |         |          |          |           |
| Examined                                        | 5       | 5        | 5        | 5         |
| No Visible Lesions                              | 5       | 5        | 5        | 5         |
| <b>dorsal root ganglia, thoracic, left</b>      |         |          |          |           |
| Examined                                        | 5       | 5        | 5        | 5         |
| No Visible Lesions                              | 5       | 5        | 5        | 5         |
| <b>dorsal root ganglia, lumbar, left</b>        |         |          |          |           |
| Examined                                        | 5       | 5        | 5        | 5         |
| No Visible Lesions                              | 4       | 4        | 5        | 4         |

2759-001 - Summary of Microscopic Observations, Day 8

| Sex: Male                                                   | Vehicle | Low Dose | Mid Dose | High Dose |
|-------------------------------------------------------------|---------|----------|----------|-----------|
| Number of Animals:                                          | SS<br>5 | SS<br>5  | SS<br>5  | SS<br>5   |
| <b>dorsal root ganglia, lumbar, left<br/>(Continued...)</b> |         |          |          |           |
| infiltration, mononuclear cell,<br>perivascular             | 1       | 1        | 0        | 1         |
| .... minimal                                                | 1       | 1        | 0        | 1         |

2759-001 - Summary of Microscopic Observations, Day 8

| Sex: Female<br><br>Number of Animals:           | Vehicle | Low Dose | Mid Dose | High Dose |
|-------------------------------------------------|---------|----------|----------|-----------|
|                                                 | SS      | SS       | SS       | SS        |
|                                                 | 5       | 5        | 5        | 5         |
| <b>brain</b>                                    |         |          |          |           |
| Examined                                        | 5       | 5        | 5        | 5         |
| No Visible Lesions                              | 5       | 5        | 5        | 5         |
| <b>dorsal root ganglia lumbar, right</b>        |         |          |          |           |
| Examined                                        | 5       | 5        | 5        | 5         |
| No Visible Lesions                              | 4       | 4        | 4        | 5         |
| infiltration, mononuclear cell,<br>perivascular | 1       | 1        | 1        | 0         |
| .... minimal                                    | 1       | 1        | 1        | 0         |
| <b>dorsal root ganglia, cervical, right</b>     |         |          |          |           |
| Examined                                        | 5       | 5        | 5        | 5         |
| No Visible Lesions                              | 5       | 5        | 5        | 5         |
| <b>dorsal root ganglia, thoracic, right</b>     |         |          |          |           |
| Examined                                        | 5       | 4        | 5        | 5         |
| No Visible Lesions                              | 5       | 4        | 5        | 5         |
| <b>heart</b>                                    |         |          |          |           |
| Examined                                        | 5       | 5        | 5        | 5         |
| No Visible Lesions                              | 5       | 5        | 5        | 5         |
| cardiomyopathy                                  | 0       | 0        | 0        | 0         |
| .... minimal                                    | 0       | 0        | 0        | 0         |
| <b>kidneys</b>                                  |         |          |          |           |
| Examined                                        | 5       | 5        | 5        | 5         |
| No Visible Lesions                              | 2       | 5        | 4        | 3         |
| infiltration, mononuclear cell                  | 1       | 0        | 0        | 1         |
| .... minimal                                    | 1       | 0        | 0        | 1         |
| mineralization                                  | 2       | 0        | 1        | 1         |
| .... minimal                                    | 2       | 0        | 1        | 1         |
| <b>liver</b>                                    |         |          |          |           |
| Examined                                        | 5       | 5        | 5        | 5         |
| No Visible Lesions                              | 2       | 3        | 3        | 5         |
| hemorrhage                                      | 0       | 0        | 0        | 0         |
| .... minimal                                    | 0       | 0        | 0        | 0         |
| infiltration, mononuclear cell                  | 3       | 2        | 2        | 0         |
| .... minimal                                    | 3       | 2        | 2        | 0         |

2759-001 - Summary of Microscopic Observations, Day 8

| Sex: Female<br><br>Number of Animals:  | Vehicle | Low Dose | Mid Dose | High Dose |
|----------------------------------------|---------|----------|----------|-----------|
|                                        | SS      | SS       | SS       | SS        |
|                                        | 5       | 5        | 5        | 5         |
| <b>lung</b>                            |         |          |          |           |
| Examined                               | 5       | 5        | 5        | 5         |
| No Visible Lesions                     | 3       | 2        | 5        | 4         |
| hemorrhage                             | 0       | 0        | 0        | 0         |
| .... minimal                           | 0       | 0        | 0        | 0         |
| infiltration, mononuclear cell         | 1       | 3        | 0        | 1         |
| .... minimal                           | 1       | 3        | 0        | 1         |
| macrophages, alveolar                  | 1       | 0        | 0        | 0         |
| .... minimal                           | 1       | 0        | 0        | 0         |
| infiltration, mixed cell, perivascular | 0       | 0        | 0        | 0         |
| .... minimal                           | 0       | 0        | 0        | 0         |
| <b>lymph node, mandibular</b>          |         |          |          |           |
| Examined                               | 5       | 5        | 5        | 5         |
| No Visible Lesions                     | 5       | 5        | 5        | 5         |
| <b>lymph node, mesenteric</b>          |         |          |          |           |
| Examined                               | 5       | 5        | 5        | 5         |
| No Visible Lesions                     | 5       | 5        | 5        | 5         |
| <b>ovaries</b>                         |         |          |          |           |
| Examined                               | 5       | 5        | 5        | 5         |
| No Visible Lesions                     | 5       | 5        | 5        | 5         |
| <b>skeletal muscle, biceps femoris</b> |         |          |          |           |
| Examined                               | 5       | 5        | 5        | 5         |
| No Visible Lesions                     | 5       | 5        | 5        | 5         |
| <b>skeletal muscle, gastrocnemius</b>  |         |          |          |           |
| Examined                               | 5       | 5        | 5        | 5         |
| No Visible Lesions                     | 5       | 5        | 5        | 5         |
| <b>spinal cord, cervical</b>           |         |          |          |           |
| Examined                               | 5       | 5        | 5        | 5         |
| No Visible Lesions                     | 5       | 5        | 5        | 5         |
| <b>spinal cord, lumbar</b>             |         |          |          |           |
| Examined                               | 5       | 5        | 5        | 5         |
| No Visible Lesions                     | 5       | 5        | 3        | 5         |
| gliosis                                | 0       | 0        | 2        | 0         |
| .... minimal                           | 0       | 0        | 2        | 0         |



2759-001 - Summary of Microscopic Observations, Day 8

| Sex: Female<br><br>Number of Animals:                           | Vehicle | Low Dose | Mid Dose | High Dose |
|-----------------------------------------------------------------|---------|----------|----------|-----------|
|                                                                 | SS      | SS       | SS       | SS        |
|                                                                 | 5       | 5        | 5        | 5         |
| <b>spinal cord, lumbar<br/>(Continued...)</b>                   |         |          |          |           |
| infiltration, mononuclear cell,<br>perivascular<br>.... minimal | 0       | 0        | 2        | 0         |
|                                                                 | 0       | 0        | 2        | 0         |
| <b>spinal cord, thoracic</b>                                    |         |          |          |           |
| Examined                                                        | 5       | 5        | 5        | 5         |
| No Visible Lesions                                              | 5       | 5        | 4        | 5         |
| gliosis                                                         | 0       | 0        | 1        | 0         |
| .... minimal                                                    | 0       | 0        | 1        | 0         |
| infiltration, mononuclear cell,<br>perivascular<br>.... minimal | 0       | 0        | 1        | 0         |
|                                                                 | 0       | 0        | 1        | 0         |
| <b>spleen</b>                                                   |         |          |          |           |
| Examined                                                        | 5       | 5        | 5        | 5         |
| No Visible Lesions                                              | 3       | 5        | 4        | 0         |
| depletion, lymphoid, marginal<br>zone<br>.... minimal           | 0       | 0        | 0        | 5         |
|                                                                 | 0       | 0        | 0        | 3         |
| .... mild                                                       | 0       | 0        | 0        | 1         |
| .... marked                                                     | 0       | 0        | 0        | 1         |
| hyperplasia, lymphoid, follicular<br>.... minimal               | 2       | 0        | 1        | 0         |
|                                                                 | 2       | 0        | 1        | 0         |
| <b>thymus</b>                                                   |         |          |          |           |
| Examined                                                        | 5       | 5        | 5        | 5         |
| No Visible Lesions                                              | 5       | 2        | 5        | 5         |
| hemorrhage<br>.... minimal                                      | 0       | 3        | 0        | 0         |
|                                                                 | 0       | 3        | 0        | 0         |
| <b>dorsal root ganglia, cervical, left</b>                      |         |          |          |           |
| Examined                                                        | 5       | 5        | 5        | 4         |
| No Visible Lesions                                              | 5       | 5        | 5        | 4         |
| <b>dorsal root ganglia, thoracic, left</b>                      |         |          |          |           |
| Examined                                                        | 5       | 3        | 5        | 5         |
| No Visible Lesions                                              | 5       | 3        | 5        | 5         |
| <b>dorsal root ganglia, lumbar, left</b>                        |         |          |          |           |
| Examined                                                        | 4       | 5        | 5        | 5         |
| No Visible Lesions                                              | 4       | 4        | 5        | 4         |

2759-001 - Summary of Microscopic Observations, Day 8

| Sex: Female<br><br>Number of Animals:                       | Vehicle | Low Dose | Mid Dose | High Dose |
|-------------------------------------------------------------|---------|----------|----------|-----------|
|                                                             | SS      | SS       | SS       | SS        |
|                                                             | 5       | 5        | 5        | 5         |
| <b>dorsal root ganglia, lumbar, left<br/>(Continued...)</b> |         |          |          |           |
| infiltration, mononuclear cell,<br>perivascular             | 0       | 1        | 0        | 1         |
| .... minimal                                                | 0       | 1        | 0        | 1         |

**Table 8**  
**Summary of Microscopic Pathology Findings (Day 29)**

2759-001 - Summary of Microscopic Observations, Day 29

| Sex: Male<br><br>Number of Animals:             | Vehicle | Low Dose | Mid Dose | High Dose |
|-------------------------------------------------|---------|----------|----------|-----------|
|                                                 | SS      | SS       | SS       | SS        |
|                                                 | 5       | 5        | 5        | 5         |
| <b>brain</b>                                    |         |          |          |           |
| Examined                                        | 5       | 5        | 5        | 5         |
| No Visible Lesions                              | 5       | 5        | 5        | 5         |
| <b>dorsal root ganglia lumbar, right</b>        |         |          |          |           |
| Examined                                        | 5       | 5        | 5        | 5         |
| No Visible Lesions                              | 5       | 3        | 4        | 3         |
| infiltration, mononuclear cell,<br>perivascular | 0       | 2        | 1        | 2         |
| .... minimal                                    | 0       | 1        | 1        | 2         |
| .... mild                                       | 0       | 1        | 0        | 0         |
| <b>dorsal root ganglia, cervical, right</b>     |         |          |          |           |
| Examined                                        | 5       | 5        | 5        | 5         |
| No Visible Lesions                              | 5       | 5        | 5        | 5         |
| <b>dorsal root ganglia, thoracic, right</b>     |         |          |          |           |
| Examined                                        | 5       | 5        | 5        | 5         |
| No Visible Lesions                              | 5       | 5        | 5        | 5         |
| <b>heart</b>                                    |         |          |          |           |
| Examined                                        | 5       | 5        | 5        | 5         |
| No Visible Lesions                              | 4       | 3        | 1        | 5         |
| cardiomyopathy                                  | 1       | 2        | 4        | 0         |
| .... minimal                                    | 1       | 2        | 4        | 0         |
| infiltration, mononuclear cell                  | 0       | 0        | 0        | 0         |
| .... minimal                                    | 0       | 0        | 0        | 0         |
| <b>kidneys</b>                                  |         |          |          |           |
| Examined                                        | 5       | 5        | 5        | 5         |
| No Visible Lesions                              | 5       | 5        | 4        | 3         |
| cast/casts                                      | 0       | 0        | 0        | 0         |
| .... minimal                                    | 0       | 0        | 0        | 0         |
| cyst                                            | 0       | 0        | 0        | 0         |
| .... minimal                                    | 0       | 0        | 0        | 0         |
| infiltration, mononuclear cell                  | 0       | 0        | 0        | 1         |
| .... minimal                                    | 0       | 0        | 0        | 1         |
| mineralization                                  | 0       | 0        | 1        | 1         |
| .... minimal                                    | 0       | 0        | 1        | 1         |

2759-001 - Summary of Microscopic Observations, Day 29

| Sex: Male<br><br>Number of Animals:       | Vehicle | Low Dose | Mid Dose | High Dose |
|-------------------------------------------|---------|----------|----------|-----------|
|                                           | SS      | SS       | SS       | SS        |
|                                           | 5       | 5        | 5        | 5         |
| <b>liver</b>                              |         |          |          |           |
| Examined                                  | 5       | 5        | 5        | 5         |
| No Visible Lesions                        | 3       | 0        | 3        | 1         |
| infiltration, mononuclear cell            | 1       | 5        | 2        | 4         |
| .... minimal                              | 1       | 5        | 2        | 4         |
| congestion                                | 1       | 0        | 0        | 0         |
| .... minimal                              | 1       | 0        | 0        | 0         |
| <b>lung</b>                               |         |          |          |           |
| Examined                                  | 5       | 5        | 5        | 5         |
| No Visible Lesions                        | 3       | 3        | 3        | 4         |
| hemorrhage                                | 1       | 0        | 0        | 0         |
| .... minimal                              | 0       | 0        | 0        | 0         |
| .... mild                                 | 1       | 0        | 0        | 0         |
| infiltration, mononuclear cell            | 1       | 2        | 2        | 1         |
| .... minimal                              | 1       | 2        | 2        | 1         |
| <b>lymph node, mandibular</b>             |         |          |          |           |
| Examined                                  | 5       | 5        | 5        | 5         |
| No Visible Lesions                        | 5       | 5        | 5        | 5         |
| <b>lymph node, mesenteric</b>             |         |          |          |           |
| Examined                                  | 5       | 5        | 5        | 5         |
| No Visible Lesions                        | 4       | 5        | 5        | 4         |
| erythrocytosis/erythrophagocytosis, sinus | 1       | 0        | 0        | 0         |
| .... minimal                              | 1       | 0        | 0        | 0         |
| infiltration, mast cell                   | 0       | 0        | 0        | 1         |
| .... minimal                              | 0       | 0        | 0        | 1         |
| <b>skeletal muscle, biceps femoris</b>    |         |          |          |           |
| Examined                                  | 5       | 5        | 5        | 5         |
| No Visible Lesions                        | 5       | 5        | 5        | 5         |
| degeneration                              | 0       | 0        | 0        | 0         |
| .... minimal                              | 0       | 0        | 0        | 0         |
| <b>skeletal muscle, gastrocnemius</b>     |         |          |          |           |
| Examined                                  | 5       | 5        | 5        | 5         |
| No Visible Lesions                        | 5       | 5        | 4        | 5         |
| degeneration                              | 0       | 0        | 1        | 0         |

2759-001 - Summary of Microscopic Observations, Day 29

| Sex: Male<br><br>Number of Animals:                  | Vehicle | Low Dose | Mid Dose | High Dose |
|------------------------------------------------------|---------|----------|----------|-----------|
|                                                      | SS      | SS       | SS       | SS        |
|                                                      | 5       | 5        | 5        | 5         |
| <b>skeletal muscle, gastrocnemius (Continued...)</b> |         |          |          |           |
| .... minimal                                         | 0       | 0        | 1        | 0         |
| <b>skin</b>                                          |         |          |          |           |
| Examined                                             | 0       | 0        | 0        | 1         |
| hyperkeratosis                                       | -       | -        | -        | 1         |
| .... minimal                                         | -       | -        | -        | 1         |
| inflammation                                         | -       | -        | -        | 1         |
| .... minimal                                         | -       | -        | -        | 1         |
| <b>spinal cord, cervical</b>                         |         |          |          |           |
| Examined                                             | 5       | 5        | 5        | 5         |
| No Visible Lesions                                   | 5       | 5        | 5        | 5         |
| <b>spinal cord, lumbar</b>                           |         |          |          |           |
| Examined                                             | 5       | 5        | 5        | 5         |
| No Visible Lesions                                   | 5       | 5        | 5        | 5         |
| <b>spinal cord, thoracic</b>                         |         |          |          |           |
| Examined                                             | 5       | 5        | 5        | 5         |
| No Visible Lesions                                   | 5       | 5        | 5        | 5         |
| <b>spleen</b>                                        |         |          |          |           |
| Examined                                             | 5       | 5        | 5        | 5         |
| No Visible Lesions                                   | 2       | 4        | 3        | 3         |
| hyperplasia, lymphoid, follicular                    | 3       | 1        | 2        | 2         |
| .... minimal                                         | 3       | 1        | 2        | 2         |
| <b>testes</b>                                        |         |          |          |           |
| Examined                                             | 5       | 5        | 5        | 5         |
| No Visible Lesions                                   | 5       | 5        | 5        | 5         |
| <b>thymus</b>                                        |         |          |          |           |
| Examined                                             | 5       | 5        | 5        | 5         |
| No Visible Lesions                                   | 5       | 4        | 5        | 3         |
| hemorrhage                                           | 0       | 1        | 0        | 2         |
| .... minimal                                         | 0       | 1        | 0        | 2         |
| <b>dorsal root ganglia, cervical, left</b>           |         |          |          |           |
| Examined                                             | 5       | 5        | 5        | 5         |
| No Visible Lesions                                   | 5       | 5        | 5        | 5         |

2759-001 - Summary of Microscopic Observations, Day 29

| Sex: Male<br><br>Number of Animals:             | Vehicle | Low Dose | Mid Dose | High Dose |
|-------------------------------------------------|---------|----------|----------|-----------|
|                                                 | SS      | SS       | SS       | SS        |
|                                                 | 5       | 5        | 5        | 5         |
| <b>dorsal root ganglia, thoracic, left</b>      |         |          |          |           |
| Examined                                        | 5       | 4        | 5        | 5         |
| No Visible Lesions                              | 5       | 4        | 5        | 5         |
| <b>dorsal root ganglia, lumbar, left</b>        |         |          |          |           |
| Examined                                        | 5       | 5        | 5        | 5         |
| No Visible Lesions                              | 5       | 4        | 4        | 4         |
| infiltration, mononuclear cell,<br>perivascular | 0       | 1        | 1        | 1         |
| .... minimal                                    | 0       | 1        | 1        | 1         |

2759-001 - Summary of Microscopic Observations, Day 29

| Sex: Female<br><br>Number of Animals:           | Vehicle | Low Dose | Mid Dose | High Dose |
|-------------------------------------------------|---------|----------|----------|-----------|
|                                                 | SS      | SS       | SS       | SS        |
|                                                 | 5       | 5        | 5        | 5         |
| <b>brain</b>                                    |         |          |          |           |
| Examined                                        | 5       | 5        | 5        | 5         |
| No Visible Lesions                              | 5       | 5        | 5        | 5         |
| <b>dorsal root ganglia lumbar, right</b>        |         |          |          |           |
| Examined                                        | 5       | 5        | 5        | 5         |
| No Visible Lesions                              | 4       | 4        | 5        | 4         |
| infiltration, mononuclear cell,<br>perivascular | 1       | 1        | 0        | 1         |
| .... minimal                                    | 1       | 1        | 0        | 1         |
| .... mild                                       | 0       | 0        | 0        | 0         |
| <b>dorsal root ganglia, cervical, right</b>     |         |          |          |           |
| Examined                                        | 5       | 5        | 5        | 5         |
| No Visible Lesions                              | 5       | 5        | 5        | 5         |
| <b>dorsal root ganglia, thoracic, right</b>     |         |          |          |           |
| Examined                                        | 5       | 5        | 5        | 5         |
| No Visible Lesions                              | 5       | 5        | 5        | 5         |
| <b>heart</b>                                    |         |          |          |           |
| Examined                                        | 5       | 5        | 5        | 5         |
| No Visible Lesions                              | 5       | 4        | 5        | 3         |
| cardiomyopathy                                  | 0       | 1        | 0        | 1         |
| .... minimal                                    | 0       | 1        | 0        | 1         |
| infiltration, mononuclear cell                  | 0       | 0        | 0        | 1         |
| .... minimal                                    | 0       | 0        | 0        | 1         |
| <b>kidneys</b>                                  |         |          |          |           |
| Examined                                        | 5       | 5        | 5        | 5         |
| No Visible Lesions                              | 4       | 4        | 3        | 1         |
| cast/casts                                      | 0       | 1        | 0        | 0         |
| .... minimal                                    | 0       | 1        | 0        | 0         |
| cyst                                            | 1       | 0        | 0        | 0         |
| .... minimal                                    | 1       | 0        | 0        | 0         |
| infiltration, mononuclear cell                  | 0       | 1        | 0        | 1         |
| .... minimal                                    | 0       | 1        | 0        | 1         |
| mineralization                                  | 0       | 0        | 2        | 3         |
| .... minimal                                    | 0       | 0        | 2        | 3         |



2759-001 - Summary of Microscopic Observations, Day 29

| Sex: Female<br><br>Number of Animals:     | Vehicle | Low Dose | Mid Dose | High Dose |
|-------------------------------------------|---------|----------|----------|-----------|
|                                           | SS      | SS       | SS       | SS        |
|                                           | 5       | 5        | 5        | 5         |
| <b>liver</b>                              |         |          |          |           |
| Examined                                  | 5       | 5        | 5        | 5         |
| No Visible Lesions                        | 1       | 4        | 3        | 3         |
| infiltration, mononuclear cell            | 4       | 1        | 2        | 2         |
| .... minimal                              | 4       | 1        | 2        | 2         |
| congestion                                | 0       | 0        | 0        | 0         |
| .... minimal                              | 0       | 0        | 0        | 0         |
| <b>lung</b>                               |         |          |          |           |
| Examined                                  | 5       | 5        | 5        | 5         |
| No Visible Lesions                        | 2       | 5        | 5        | 4         |
| hemorrhage                                | 0       | 0        | 0        | 1         |
| .... minimal                              | 0       | 0        | 0        | 1         |
| .... mild                                 | 0       | 0        | 0        | 0         |
| infiltration, mononuclear cell            | 3       | 0        | 0        | 0         |
| .... minimal                              | 3       | 0        | 0        | 0         |
| <b>lymph node, mandibular</b>             |         |          |          |           |
| Examined                                  | 5       | 5        | 5        | 5         |
| No Visible Lesions                        | 5       | 5        | 5        | 5         |
| <b>lymph node, mesenteric</b>             |         |          |          |           |
| Examined                                  | 5       | 5        | 5        | 5         |
| No Visible Lesions                        | 5       | 5        | 5        | 5         |
| erythrocytosis/erythrophagocytosis, sinus | 0       | 0        | 0        | 0         |
| .... minimal                              | 0       | 0        | 0        | 0         |
| infiltration, mast cell                   | 0       | 0        | 0        | 0         |
| .... minimal                              | 0       | 0        | 0        | 0         |
| <b>ovaries</b>                            |         |          |          |           |
| Examined                                  | 5       | 5        | 5        | 5         |
| No Visible Lesions                        | 5       | 5        | 5        | 5         |
| <b>skeletal muscle, biceps femoris</b>    |         |          |          |           |
| Examined                                  | 5       | 5        | 5        | 5         |
| No Visible Lesions                        | 5       | 5        | 4        | 5         |
| degeneration                              | 0       | 0        | 1        | 0         |
| .... minimal                              | 0       | 0        | 1        | 0         |

2759-001 - Summary of Microscopic Observations, Day 29

| Sex: Female<br><br>Number of Animals:           | Vehicle | Low Dose | Mid Dose | High Dose |
|-------------------------------------------------|---------|----------|----------|-----------|
|                                                 | SS      | SS       | SS       | SS        |
|                                                 | 5       | 5        | 5        | 5         |
| <b>skeletal muscle, gastrocnemius</b>           |         |          |          |           |
| Examined                                        | 5       | 5        | 5        | 5         |
| No Visible Lesions                              | 5       | 5        | 5        | 4         |
| degeneration                                    | 0       | 0        | 0        | 1         |
| .... minimal                                    | 0       | 0        | 0        | 1         |
| <b>spinal cord, cervical</b>                    |         |          |          |           |
| Examined                                        | 5       | 5        | 5        | 5         |
| No Visible Lesions                              | 5       | 5        | 5        | 5         |
| <b>spinal cord, lumbar</b>                      |         |          |          |           |
| Examined                                        | 5       | 5        | 5        | 5         |
| No Visible Lesions                              | 5       | 5        | 5        | 5         |
| <b>spinal cord, thoracic</b>                    |         |          |          |           |
| Examined                                        | 5       | 5        | 5        | 5         |
| No Visible Lesions                              | 5       | 5        | 5        | 5         |
| <b>spleen</b>                                   |         |          |          |           |
| Examined                                        | 5       | 5        | 5        | 5         |
| No Visible Lesions                              | 4       | 3        | 3        | 2         |
| hyperplasia, lymphoid, follicular               | 1       | 2        | 2        | 3         |
| .... minimal                                    | 1       | 2        | 2        | 3         |
| <b>thymus</b>                                   |         |          |          |           |
| Examined                                        | 5       | 5        | 5        | 5         |
| No Visible Lesions                              | 4       | 5        | 5        | 5         |
| hemorrhage                                      | 1       | 0        | 0        | 0         |
| .... minimal                                    | 1       | 0        | 0        | 0         |
| <b>dorsal root ganglia, cervical, left</b>      |         |          |          |           |
| Examined                                        | 5       | 5        | 5        | 5         |
| No Visible Lesions                              | 5       | 5        | 5        | 5         |
| <b>dorsal root ganglia, thoracic, left</b>      |         |          |          |           |
| Examined                                        | 5       | 5        | 5        | 5         |
| No Visible Lesions                              | 5       | 5        | 5        | 5         |
| <b>dorsal root ganglia, lumbar, left</b>        |         |          |          |           |
| Examined                                        | 5       | 5        | 5        | 5         |
| No Visible Lesions                              | 5       | 4        | 3        | 3         |
| infiltration, mononuclear cell,<br>perivascular | 0       | 1        | 2        | 2         |
| .... minimal                                    | 0       | 1        | 2        | 2         |

**Table 9**  
**Summary of Microscopic Pathology Findings (Day 91)**

2759-001 - Summary of Microscopic Observations, Day 91

| Sex: Male<br><br>Number of Animals:             | Vehicle | Low Dose | Mid Dose | High Dose |
|-------------------------------------------------|---------|----------|----------|-----------|
|                                                 | SS      | SS       | SS       | SS        |
|                                                 | 5       | 5        | 5        | 5         |
| <b>brain</b>                                    |         |          |          |           |
| Examined                                        | 5       | 5        | 5        | 5         |
| No Visible Lesions                              | 5       | 5        | 5        | 5         |
| <b>dorsal root ganglia lumbar, right</b>        |         |          |          |           |
| Examined                                        | 5       | 5        | 5        | 5         |
| No Visible Lesions                              | 5       | 5        | 5        | 5         |
| infiltration, mononuclear cell,<br>perivascular | 0       | 0        | 0        | 0         |
| .... minimal                                    | 0       | 0        | 0        | 0         |
| <b>dorsal root ganglia, cervical, right</b>     |         |          |          |           |
| Examined                                        | 5       | 5        | 5        | 5         |
| No Visible Lesions                              | 5       | 5        | 5        | 5         |
| <b>dorsal root ganglia, thoracic, right</b>     |         |          |          |           |
| Examined                                        | 5       | 5        | 5        | 5         |
| No Visible Lesions                              | 5       | 5        | 5        | 5         |
| <b>heart</b>                                    |         |          |          |           |
| Examined                                        | 5       | 5        | 5        | 5         |
| No Visible Lesions                              | 3       | 1        | 3        | 2         |
| cardiomyopathy                                  | 2       | 3        | 2        | 3         |
| .... minimal                                    | 2       | 3        | 1        | 3         |
| .... mild                                       | 0       | 0        | 1        | 0         |
| fibrosis                                        | 0       | 1        | 0        | 0         |
| .... minimal                                    | 0       | 1        | 0        | 0         |
| <b>kidneys</b>                                  |         |          |          |           |
| Examined                                        | 5       | 5        | 5        | 5         |
| No Visible Lesions                              | 4       | 5        | 5        | 5         |
| infiltration, mononuclear cell                  | 0       | 0        | 0        | 0         |
| .... minimal                                    | 0       | 0        | 0        | 0         |
| inflammation, subacute/chronic                  | 1       | 0        | 0        | 0         |
| .... moderate                                   | 1       | 0        | 0        | 0         |
| mineralization                                  | 0       | 0        | 0        | 0         |
| .... minimal                                    | 0       | 0        | 0        | 0         |
| <b>liver</b>                                    |         |          |          |           |
| Examined                                        | 5       | 5        | 5        | 5         |

2759-001 - Summary of Microscopic Observations, Day 91

| Sex: Male<br><br>Number of Animals:    | Vehicle | Low Dose | Mid Dose | High Dose |
|----------------------------------------|---------|----------|----------|-----------|
|                                        | SS      | SS       | SS       | SS        |
|                                        | 5       | 5        | 5        | 5         |
| <b>liver (Continued...)</b>            |         |          |          |           |
| No Visible Lesions                     | 1       | 0        | 0        | 1         |
| infiltration, mononuclear cell         | 4       | 5        | 5        | 4         |
| .... minimal                           | 4       | 5        | 5        | 4         |
| <b>lung</b>                            |         |          |          |           |
| Examined                               | 5       | 5        | 5        | 5         |
| No Visible Lesions                     | 3       | 3        | 3        | 4         |
| infiltration, mononuclear cell         | 2       | 2        | 2        | 1         |
| .... minimal                           | 2       | 2        | 2        | 1         |
| macrophages, alveolar                  | 0       | 0        | 0        | 0         |
| .... minimal                           | 0       | 0        | 0        | 0         |
| <b>lymph node, mandibular</b>          |         |          |          |           |
| Examined                               | 5       | 5        | 5        | 5         |
| No Visible Lesions                     | 5       | 5        | 5        | 5         |
| <b>lymph node, mesenteric</b>          |         |          |          |           |
| Examined                               | 5       | 5        | 5        | 5         |
| No Visible Lesions                     | 5       | 5        | 5        | 5         |
| <b>skeletal muscle, biceps femoris</b> |         |          |          |           |
| Examined                               | 5       | 5        | 5        | 5         |
| No Visible Lesions                     | 5       | 5        | 5        | 5         |
| <b>skeletal muscle, gastrocnemius</b>  |         |          |          |           |
| Examined                               | 5       | 5        | 5        | 5         |
| No Visible Lesions                     | 5       | 5        | 5        | 4         |
| degeneration                           | 0       | 0        | 0        | 1         |
| .... minimal                           | 0       | 0        | 0        | 1         |
| <b>spinal cord, cervical</b>           |         |          |          |           |
| Examined                               | 5       | 5        | 5        | 5         |
| No Visible Lesions                     | 5       | 5        | 5        | 5         |
| <b>spinal cord, lumbar</b>             |         |          |          |           |
| Examined                               | 5       | 5        | 5        | 5         |
| No Visible Lesions                     | 5       | 5        | 5        | 5         |
| <b>spinal cord, thoracic</b>           |         |          |          |           |
| Examined                               | 5       | 5        | 5        | 5         |
| No Visible Lesions                     | 5       | 5        | 5        | 5         |

2759-001 - Summary of Microscopic Observations, Day 91

| Sex: Male<br><br>Number of Animals:          | Vehicle | Low Dose | Mid Dose | High Dose |
|----------------------------------------------|---------|----------|----------|-----------|
|                                              | SS      | SS       | SS       | SS        |
|                                              | 5       | 5        | 5        | 5         |
| <b>spleen</b>                                |         |          |          |           |
| Examined                                     | 5       | 5        | 5        | 5         |
| No Visible Lesions                           | 5       | 4        | 5        | 4         |
| hyperplasia, lymphoid, follicular            | 0       | 1        | 0        | 1         |
| .... minimal                                 | 0       | 1        | 0        | 1         |
| <b>testes</b>                                |         |          |          |           |
| Examined                                     | 5       | 5        | 5        | 5         |
| No Visible Lesions                           | 5       | 5        | 5        | 5         |
| <b>thymus</b>                                |         |          |          |           |
| Examined                                     | 5       | 5        | 5        | 5         |
| No Visible Lesions                           | 4       | 2        | 4        | 5         |
| hemorrhage                                   | 1       | 3        | 1        | 0         |
| .... minimal                                 | 1       | 3        | 1        | 0         |
| <b>dorsal root ganglia, cervical, left</b>   |         |          |          |           |
| Examined                                     | 5       | 5        | 5        | 5         |
| No Visible Lesions                           | 5       | 5        | 5        | 5         |
| <b>dorsal root ganglia, thoracic, left</b>   |         |          |          |           |
| Examined                                     | 5       | 5        | 5        | 5         |
| No Visible Lesions                           | 5       | 5        | 5        | 5         |
| <b>dorsal root ganglia, lumbar, left</b>     |         |          |          |           |
| Examined                                     | 5       | 5        | 5        | 5         |
| No Visible Lesions                           | 5       | 4        | 5        | 5         |
| infiltration, mononuclear cell, perivascular | 0       | 1        | 0        | 0         |
| .... minimal                                 | 0       | 1        | 0        | 0         |

2759-001 - Summary of Microscopic Observations, Day 91

| Sex: Female<br><br>Number of Animals:           | Vehicle | Low Dose | Mid Dose | High Dose |
|-------------------------------------------------|---------|----------|----------|-----------|
|                                                 | SS      | SS       | SS       | SS        |
|                                                 | 5       | 5        | 5        | 5         |
| <b>brain</b>                                    |         |          |          |           |
| Examined                                        | 5       | 5        | 5        | 5         |
| No Visible Lesions                              | 5       | 5        | 5        | 5         |
| <b>dorsal root ganglia lumbar, right</b>        |         |          |          |           |
| Examined                                        | 5       | 5        | 5        | 5         |
| No Visible Lesions                              | 5       | 5        | 2        | 5         |
| infiltration, mononuclear cell,<br>perivascular | 0       | 0        | 3        | 0         |
| .... minimal                                    | 0       | 0        | 3        | 0         |
| <b>dorsal root ganglia, cervical, right</b>     |         |          |          |           |
| Examined                                        | 5       | 5        | 5        | 5         |
| No Visible Lesions                              | 5       | 5        | 5        | 5         |
| <b>dorsal root ganglia, thoracic, right</b>     |         |          |          |           |
| Examined                                        | 5       | 5        | 5        | 5         |
| No Visible Lesions                              | 5       | 5        | 5        | 5         |
| <b>heart</b>                                    |         |          |          |           |
| Examined                                        | 5       | 5        | 5        | 5         |
| No Visible Lesions                              | 5       | 5        | 5        | 5         |
| cardiomyopathy                                  | 0       | 0        | 0        | 0         |
| .... minimal                                    | 0       | 0        | 0        | 0         |
| .... mild                                       | 0       | 0        | 0        | 0         |
| fibrosis                                        | 0       | 0        | 0        | 0         |
| .... minimal                                    | 0       | 0        | 0        | 0         |
| <b>kidneys</b>                                  |         |          |          |           |
| Examined                                        | 5       | 5        | 5        | 5         |
| No Visible Lesions                              | 4       | 5        | 1        | 4         |
| infiltration, mononuclear cell                  | 0       | 0        | 1        | 0         |
| .... minimal                                    | 0       | 0        | 1        | 0         |
| inflammation, subacute/chronic                  | 0       | 0        | 0        | 0         |
| .... moderate                                   | 0       | 0        | 0        | 0         |
| mineralization                                  | 1       | 0        | 3        | 1         |
| .... minimal                                    | 1       | 0        | 3        | 1         |
| <b>liver</b>                                    |         |          |          |           |
| Examined                                        | 5       | 5        | 5        | 5         |

2759-001 - Summary of Microscopic Observations, Day 91

| Sex: Female<br><br>Number of Animals:          | Vehicle | Low Dose | Mid Dose | High Dose |
|------------------------------------------------|---------|----------|----------|-----------|
|                                                | SS      | SS       | SS       | SS        |
|                                                | 5       | 5        | 5        | 5         |
| <b>liver (Continued...)</b>                    |         |          |          |           |
| No Visible Lesions                             | 1       | 4        | 3        | 1         |
| infiltration, mononuclear cell<br>.... minimal | 4       | 1        | 2        | 4         |
|                                                | 4       | 1        | 2        | 4         |
| <b>lung</b>                                    |         |          |          |           |
| Examined                                       | 5       | 5        | 5        | 5         |
| No Visible Lesions                             | 4       | 5        | 5        | 2         |
| infiltration, mononuclear cell<br>.... minimal | 1       | 0        | 0        | 2         |
|                                                | 1       | 0        | 0        | 2         |
| macrophages, alveolar<br>.... minimal          | 0       | 0        | 0        | 1         |
|                                                | 0       | 0        | 0        | 1         |
| <b>lymph node, mandibular</b>                  |         |          |          |           |
| Examined                                       | 5       | 5        | 5        | 5         |
| No Visible Lesions                             | 5       | 5        | 5        | 5         |
| <b>lymph node, mesenteric</b>                  |         |          |          |           |
| Examined                                       | 5       | 5        | 5        | 5         |
| No Visible Lesions                             | 5       | 5        | 5        | 5         |
| <b>ovaries</b>                                 |         |          |          |           |
| Examined                                       | 5       | 5        | 5        | 5         |
| No Visible Lesions                             | 5       | 5        | 5        | 5         |
| <b>skeletal muscle, biceps femoris</b>         |         |          |          |           |
| Examined                                       | 5       | 5        | 5        | 5         |
| No Visible Lesions                             | 5       | 5        | 5        | 5         |
| <b>skeletal muscle, gastrocnemius</b>          |         |          |          |           |
| Examined                                       | 5       | 5        | 5        | 5         |
| No Visible Lesions                             | 5       | 5        | 5        | 5         |
| degeneration<br>.... minimal                   | 0       | 0        | 0        | 0         |
|                                                | 0       | 0        | 0        | 0         |
| <b>spinal cord, cervical</b>                   |         |          |          |           |
| Examined                                       | 5       | 5        | 5        | 5         |
| No Visible Lesions                             | 5       | 5        | 5        | 5         |
| <b>spinal cord, lumbar</b>                     |         |          |          |           |
| Examined                                       | 5       | 5        | 5        | 5         |
| No Visible Lesions                             | 5       | 5        | 5        | 5         |



2759-001 - Summary of Microscopic Observations, Day 91

| Sex: Female<br><br>Number of Animals:        | Vehicle | Low Dose | Mid Dose | High Dose |
|----------------------------------------------|---------|----------|----------|-----------|
|                                              | SS      | SS       | SS       | SS        |
|                                              | 5       | 5        | 5        | 5         |
| <b>spinal cord, thoracic</b>                 |         |          |          |           |
| Examined                                     | 5       | 5        | 5        | 5         |
| No Visible Lesions                           | 5       | 5        | 5        | 5         |
| <b>spleen</b>                                |         |          |          |           |
| Examined                                     | 5       | 5        | 5        | 5         |
| No Visible Lesions                           | 5       | 4        | 4        | 4         |
| hyperplasia, lymphoid, follicular            | 0       | 1        | 1        | 1         |
| .... minimal                                 | 0       | 1        | 1        | 1         |
| <b>thymus</b>                                |         |          |          |           |
| Examined                                     | 5       | 5        | 5        | 5         |
| No Visible Lesions                           | 5       | 4        | 4        | 5         |
| hemorrhage                                   | 0       | 1        | 1        | 0         |
| .... minimal                                 | 0       | 1        | 1        | 0         |
| <b>dorsal root ganglia, cervical, left</b>   |         |          |          |           |
| Examined                                     | 5       | 5        | 5        | 5         |
| No Visible Lesions                           | 5       | 5        | 5        | 5         |
| <b>dorsal root ganglia, thoracic, left</b>   |         |          |          |           |
| Examined                                     | 5       | 5        | 5        | 5         |
| No Visible Lesions                           | 5       | 5        | 5        | 5         |
| <b>dorsal root ganglia, lumbar, left</b>     |         |          |          |           |
| Examined                                     | 5       | 5        | 5        | 5         |
| No Visible Lesions                           | 4       | 5        | 3        | 5         |
| infiltration, mononuclear cell, perivascular | 1       | 0        | 2        | 0         |
| .... minimal                                 | 1       | 0        | 2        | 0         |

**Appendix 1**  
**Deviations**

## DEVIATIONS

All deviations (if any) that occurred during this study phase have been acknowledged by the Study Director, assessed for impact, and documented in the study records. All protocol deviations and those SOP deviations regarded as significant are listed below. None of the deviations were considered to have impacted the overall integrity of the study or the interpretation of the study results and conclusions.

- There were no deviations to report for this study phase.

**Appendix 2**  
**Individual Organ Weight Values (Day 8)**

2759-001  
A Single Dose Toxicity Study of Test Article Administered by Intrathecal Injection in Rats

Individual Organ Weight Values  
Day 8

Sex: Male Day: 8 Relative to Start Date

| Vehicle | Body Weight (g) | Brain (g) | Brain/BWt (%) | Adrenal glands (g) | Adrenal gl/ BWt (%) | Adrenal gl/ BrWt (ratio) | Epididymides (g) |
|---------|-----------------|-----------|---------------|--------------------|---------------------|--------------------------|------------------|
| 1006    | 330             | 1.941     | 0.5882        | 0.041              | 0.0124              | 0.0211                   | 0.600            |
| 1007    | 306             | 1.696     | 0.5542        | 0.083              | 0.0271              | 0.0489                   | 0.719            |
| 1008    | 316             | 2.030     | 0.6424        | 0.051              | 0.0161              | 0.0251                   | 0.792            |
| 1009    | 321             | 2.058     | 0.6411        | 0.060              | 0.0187              | 0.0292                   | 0.729            |
| 1010    | 336             | 1.900     | 0.5655        | 0.057              | 0.0170              | 0.0300                   | 0.680            |

2759-001  
 A Single Dose Toxicity Study of Test Article Administered by Intrathecal Injection in Rats

Individual Organ Weight Values  
 Day 8

Sex: Male Day: 8 Relative to Start Date

| Vehicle | Epididymides /BWt (%) | Epididymides /BrWt (ratio) | Heart (g) | Heart/BWt (%) | Heart/BrWt (ratio) | Kidneys (g) | Kidneys/BWt (%) |
|---------|-----------------------|----------------------------|-----------|---------------|--------------------|-------------|-----------------|
| 1006    | 0.1818                | 0.3091                     | 1.254     | 0.3800        | 0.6461             | 3.415       | 1.0348          |
| 1007    | 0.2350                | 0.4239                     | 1.202     | 0.3928        | 0.7087             | 2.820       | 0.9216          |
| 1008    | 0.2506                | 0.3901                     | 1.725     | 0.5459        | 0.8498             | 3.216       | 1.0177          |
| 1009    | 0.2271                | 0.3542                     | 1.482     | 0.4617        | 0.7201             | 3.151       | 0.9816          |
| 1010    | 0.2024                | 0.3579                     | 1.209     | 0.3598        | 0.6363             | 3.142       | 0.9351          |

2759-001  
 A Single Dose Toxicity Study of Test Article Administered by Intrathecal Injection in Rats

Individual Organ Weight Values  
 Day 8

Sex: Male Day: 8 Relative to Start Date

| Vehicle | Kidneys/BrWt | Liver  | Liver/BWt | Liver/BrWt | Lung  | Lung/BWt | Lung/BrWt |
|---------|--------------|--------|-----------|------------|-------|----------|-----------|
|         | (ratio)      | (g)    | (%)       | (ratio)    | (g)   | (%)      | (ratio)   |
| 1006    | 1.7594       | 15.311 | 4.6397    | 7.8882     | 1.818 | 0.5509   | 0.9366    |
| 1007    | 1.6627       | 14.150 | 4.6242    | 8.3432     | 1.446 | 0.4725   | 0.8526    |
| 1008    | 1.5842       | 15.147 | 4.7934    | 7.4616     | 1.734 | 0.5487   | 0.8542    |
| 1009    | 1.5311       | 13.269 | 4.1336    | 6.4475     | 1.598 | 0.4978   | 0.7765    |
| 1010    | 1.6537       | 16.108 | 4.7940    | 8.4779     | 1.478 | 0.4399   | 0.7779    |

2759-001  
 A Single Dose Toxicity Study of Test Article Administered by Intrathecal Injection in Rats

Individual Organ Weight Values  
 Day 8

Sex: Male Day: 8 Relative to Start Date

| Vehicle | Pituitary<br>(fixed)<br>(g) | Pituitary<br>(fixed)/BWt<br>(%) | Pituitary<br>(fixed)/BrWt<br>(ratio) | Prostate<br>gland<br>(g) | Prostate<br>gland/BWt<br>(%) | Prostate<br>gland/BrWt<br>(ratio) | Sal, mand/<br>sub., rt<br>(g) |
|---------|-----------------------------|---------------------------------|--------------------------------------|--------------------------|------------------------------|-----------------------------------|-------------------------------|
| 1006    | 0.0162                      | 0.0049                          | 0.0083                               | 0.488                    | 0.1479                       | 0.2514                            | 0.281                         |
| 1007    | 0.0149                      | 0.0049                          | 0.0088                               | 0.838                    | 0.2739                       | 0.4941                            | 0.324                         |
| 1008    | 0.0186                      | 0.0059                          | 0.0092                               | 0.770                    | 0.2437                       | 0.3793                            | 0.289                         |
| 1009    | 0.0170                      | 0.0053                          | 0.0083                               | 0.691                    | 0.2153                       | 0.3358                            | 0.309                         |
| 1010    | 0.0118                      | 0.0035                          | 0.0062                               | 0.698                    | 0.2077                       | 0.3674                            | 0.265                         |



2759-001  
 A Single Dose Toxicity Study of Test Article Administered by Intrathecal Injection in Rats

Individual Organ Weight Values  
 Day 8

Sex: Male Day: 8 Relative to Start Date

| Vehicle | Sal gl mand/<br>sub., rt/BWt<br>(%) | Sal gl mand/<br>sub.,rt/BrWt<br>(ratio) | Spleen<br>(g) | Spleen/BWt<br>(%) | Spleen/BrWt<br>(ratio) | Testes<br>(g) | Testes/BWt<br>(%) |
|---------|-------------------------------------|-----------------------------------------|---------------|-------------------|------------------------|---------------|-------------------|
| 1006    | 0.0852                              | 0.1448                                  | 0.763         | 0.2312            | 0.3931                 | 3.120         | 0.9455            |
| 1007    | 0.1059                              | 0.1910                                  | 0.775         | 0.2533            | 0.4570                 | 2.777         | 0.9075            |
| 1008    | 0.0915                              | 0.1424                                  | 0.779         | 0.2465            | 0.3837                 | 3.492         | 1.1051            |
| 1009    | 0.0963                              | 0.1501                                  | 0.992         | 0.3090            | 0.4820                 | 3.371         | 1.0502            |
| 1010    | 0.0789                              | 0.1395                                  | 0.782         | 0.2327            | 0.4116                 | 3.117         | 0.9277            |

2759-001  
 A Single Dose Toxicity Study of Test Article Administered by Intrathecal Injection in Rats

Individual Organ Weight Values  
 Day 8

Sex: Male Day: 8 Relative to Start Date

| Vehicle | Testes/BrWt<br>(ratio) | Thymus<br>(g) | Thymus/BWt<br>(%) | Thymus/BrWt<br>(ratio) | Thyroid/para<br>(fixed)<br>(g) | Thyroid/para<br>(fixed)/BWt<br>(%) | Thyroid/para<br>(fixed)/BrWt<br>(ratio) |
|---------|------------------------|---------------|-------------------|------------------------|--------------------------------|------------------------------------|-----------------------------------------|
| 1006    | 1.6074                 | 0.675         | 0.2045            | 0.3478                 | 0.0227                         | 0.0069                             | 0.0117                                  |
| 1007    | 1.6374                 | 0.622         | 0.2033            | 0.3667                 | 0.0267                         | 0.0087                             | 0.0157                                  |
| 1008    | 1.7202                 | 0.507         | 0.1604            | 0.2498                 | 0.0294                         | 0.0093                             | 0.0145                                  |
| 1009    | 1.6380                 | 0.690         | 0.2150            | 0.3353                 | 0.0236                         | 0.0074                             | 0.0115                                  |
| 1010    | 1.6405                 | 0.977         | 0.2908            | 0.5142                 | 0.0250                         | 0.0074                             | 0.0132                                  |

2759-001  
 A Single Dose Toxicity Study of Test Article Administered by Intrathecal Injection in Rats

Individual Organ Weight Values  
 Day 8

Sex: Male Day: 8 Relative to Start Date

| Low Dose | Body Weight (g) | Brain (g) | Brain/BWt (%) | Adrenal glands (g) | Adrenal gl/ BWt (%) | Adrenal gl/ BrWt (ratio) | Epididymides (g) |
|----------|-----------------|-----------|---------------|--------------------|---------------------|--------------------------|------------------|
| 2006     | 304             | 1.915     | 0.6299        | 0.049              | 0.0161              | 0.0256                   | 0.727            |
| 2007     | 303             | 1.918     | 0.6330        | 0.049              | 0.0162              | 0.0255                   | 0.641            |
| 2008     | 334             | 1.961     | 0.5871        | 0.092              | 0.0275              | 0.0469                   | 0.730            |
| 2009     | 289             | 1.812     | 0.6270        | 0.051              | 0.0176              | 0.0281                   | 0.607            |
| 2010     | 303             | 1.915     | 0.6320        | 0.072              | 0.0238              | 0.0376                   | 0.682            |

2759-001  
 A Single Dose Toxicity Study of Test Article Administered by Intrathecal Injection in Rats

Individual Organ Weight Values  
 Day 8

Sex: Male Day: 8 Relative to Start Date

| Low Dose | Epididymides /BWt (%) | Epididymides /BrWt (ratio) | Heart (g) | Heart/BWt (%) | Heart/BrWt (ratio) | Kidneys (g) | Kidneys/BWt (%) |
|----------|-----------------------|----------------------------|-----------|---------------|--------------------|-------------|-----------------|
| 2006     | 0.2391                | 0.3796                     | 1.105     | 0.3635        | 0.5770             | 2.545       | 0.8372          |
| 2007     | 0.2116                | 0.3342                     | 1.263     | 0.4168        | 0.6585             | 2.830       | 0.9340          |
| 2008     | 0.2186                | 0.3723                     | 1.685     | 0.5045        | 0.8593             | 3.286       | 0.9838          |
| 2009     | 0.2100                | 0.3350                     | 1.111     | 0.3844        | 0.6131             | 2.365       | 0.8183          |
| 2010     | 0.2251                | 0.3561                     | 1.528     | 0.5043        | 0.7979             | 2.801       | 0.9244          |

2759-001  
 A Single Dose Toxicity Study of Test Article Administered by Intrathecal Injection in Rats

Individual Organ Weight Values  
 Day 8

Sex: Male Day: 8 Relative to Start Date

| Low Dose | Kidneys/BrWt | Liver  | Liver/BWt | Liver/BrWt | Lung  | Lung/BWt | Lung/BrWt |
|----------|--------------|--------|-----------|------------|-------|----------|-----------|
|          | (ratio)      | (g)    | (%)       | (ratio)    | (g)   | (%)      | (ratio)   |
| 2006     | 1.3290       | 11.583 | 3.8102    | 6.0486     | 1.560 | 0.5132   | 0.8146    |
| 2007     | 1.4755       | 13.541 | 4.4690    | 7.0600     | 1.477 | 0.4875   | 0.7701    |
| 2008     | 1.6757       | 13.178 | 3.9455    | 6.7200     | 1.835 | 0.5494   | 0.9357    |
| 2009     | 1.3052       | 11.251 | 3.8931    | 6.2092     | 1.389 | 0.4806   | 0.7666    |
| 2010     | 1.4627       | 12.880 | 4.2508    | 6.7258     | 2.137 | 0.7053   | 1.1159    |

2759-001  
 A Single Dose Toxicity Study of Test Article Administered by Intrathecal Injection in Rats

Individual Organ Weight Values  
 Day 8

Sex: Male Day: 8 Relative to Start Date

| Low Dose | Pituitary<br>(fixed)<br>(g) | Pituitary<br>(fixed)/BWt<br>(%) | Pituitary<br>(fixed)/BrWt<br>(ratio) | Prostate<br>gland<br>(g) | Prostate<br>gland/BWt<br>(%) | Prostate<br>gland/BrWt<br>(ratio) | Sal, mand/<br>sub., rt<br>(g) |
|----------|-----------------------------|---------------------------------|--------------------------------------|--------------------------|------------------------------|-----------------------------------|-------------------------------|
| 2006     | 0.0145                      | 0.0048                          | 0.0076                               | 0.769                    | 0.2530                       | 0.4016                            | 0.248                         |
| 2007     | 0.0158                      | 0.0052                          | 0.0082                               | 0.548                    | 0.1809                       | 0.2857                            | 0.274                         |
| 2008     | 0.0152                      | 0.0046                          | 0.0078                               | 0.675                    | 0.2021                       | 0.3442                            | 0.328                         |
| 2009     | 0.0136                      | 0.0047                          | 0.0075                               | 0.584                    | 0.2021                       | 0.3223                            | 0.231                         |
| 2010     | 0.0148                      | 0.0049                          | 0.0077                               | 0.624                    | 0.2059                       | 0.3258                            | 0.282                         |

2759-001  
A Single Dose Toxicity Study of Test Article Administered by Intrathecal Injection in Rats

Individual Organ Weight Values  
Day 8

Sex: Male Day: 8 Relative to Start Date

| Low Dose | Sal gl mand/<br>sub., rt/BWt<br>(%) | Sal gl mand/<br>sub.,rt/BrWt<br>(ratio) | Spleen<br>(g) | Spleen/BWt<br>(%) | Spleen/BrWt<br>(ratio) | Testes<br>(g) | Testes/BWt<br>(%) |
|----------|-------------------------------------|-----------------------------------------|---------------|-------------------|------------------------|---------------|-------------------|
|          | 2006                                | 0.0816                                  | 0.1295        | 0.622             | 0.2046                 | 0.3248        | 3.003             |
| 2007     | 0.0904                              | 0.1429                                  | 0.856         | 0.2825            | 0.4463                 | 2.901         | 0.9574            |
| 2008     | 0.0982                              | 0.1673                                  | 0.935         | 0.2799            | 0.4768                 | 3.879         | 1.1614            |
| 2009     | 0.0799                              | 0.1275                                  | 0.811         | 0.2806            | 0.4476                 | 2.820         | 0.9758            |
| 2010     | 0.0931                              | 0.1473                                  | 0.849         | 0.2802            | 0.4433                 | 3.314         | 1.0937            |

2759-001  
A Single Dose Toxicity Study of Test Article Administered by Intrathecal Injection in Rats

Individual Organ Weight Values  
Day 8

Sex: Male Day: 8 Relative to Start Date

| Low Dose | Testes/BrWt | Thymus | Thymus/BWt | Thymus/BrWt | Thyroid/para<br>(fixed) | Thyroid/para<br>(fixed)/BWt | Thyroid/para<br>(fixed)/BrWt |
|----------|-------------|--------|------------|-------------|-------------------------|-----------------------------|------------------------------|
|          | (ratio)     | (g)    | (%)        | (ratio)     | (g)                     | (%)                         | (ratio)                      |
| 2006     | 1.5681      | 0.545  | 0.1793     | 0.2846      | 0.0218                  | 0.0072                      | 0.0114                       |
| 2007     | 1.5125      | 0.582  | 0.1921     | 0.3034      | 0.0225                  | 0.0074                      | 0.0117                       |
| 2008     | 1.9781      | 0.998  | 0.2988     | 0.5089      | 0.0237                  | 0.0071                      | 0.0121                       |
| 2009     | 1.5563      | 0.427  | 0.1478     | 0.2357      | 0.0185                  | 0.0064                      | 0.0102                       |
| 2010     | 1.7305      | 0.630  | 0.2079     | 0.3290      | 0.0236                  | 0.0078                      | 0.0123                       |



2759-001  
A Single Dose Toxicity Study of Test Article Administered by Intrathecal Injection in Rats

Individual Organ Weight Values  
Day 8

Sex: Male Day: 8 Relative to Start Date

| Mid Dose | Body Weight (g) | Brain (g) | Brain/BWt (%) | Adrenal glands (g) | Adrenal gl/ BWt (%) | Adrenal gl/ BrWt (ratio) | Epididymides (g) |
|----------|-----------------|-----------|---------------|--------------------|---------------------|--------------------------|------------------|
| 3006     | 324             | 1.945     | 0.6003        | 0.075              | 0.0231              | 0.0386                   | 0.616            |
| 3007     | 314             | 1.928     | 0.6140        | 0.051              | 0.0162              | 0.0265                   | 0.570            |
| 3008     | 338             | 1.902     | 0.5627        | 0.083              | 0.0246              | 0.0436                   | 0.898            |
| 3009     | 317             | 2.026     | 0.6391        | 0.063              | 0.0199              | 0.0311                   | 0.850            |
| 3010     | 308             | 1.994     | 0.6474        | 0.061              | 0.0198              | 0.0306                   | 0.794            |

2759-001  
 A Single Dose Toxicity Study of Test Article Administered by Intrathecal Injection in Rats

Individual Organ Weight Values  
 Day 8

Sex: Male Day: 8 Relative to Start Date

| Mid Dose | Epididymides<br>/BWt<br>(%) | Epididymides<br>/BrWt<br>(ratio) | Heart<br>(g) | Heart/BWt<br>(%) | Heart/BrWt<br>(ratio) | Kidneys<br>(g) | Kidneys/BWt<br>(%) |
|----------|-----------------------------|----------------------------------|--------------|------------------|-----------------------|----------------|--------------------|
| 3006     | 0.1901                      | 0.3167                           | 1.720        | 0.5309           | 0.8843                | 2.994          | 0.9241             |
| 3007     | 0.1815                      | 0.2956                           | 1.354        | 0.4312           | 0.7023                | 2.760          | 0.8790             |
| 3008     | 0.2657                      | 0.4721                           | 1.513        | 0.4476           | 0.7955                | 3.160          | 0.9349             |
| 3009     | 0.2681                      | 0.4195                           | 1.128        | 0.3558           | 0.5568                | 3.013          | 0.9505             |
| 3010     | 0.2578                      | 0.3982                           | 1.482        | 0.4812           | 0.7432                | 3.016          | 0.9792             |

2759-001  
 A Single Dose Toxicity Study of Test Article Administered by Intrathecal Injection in Rats

Individual Organ Weight Values  
 Day 8

Sex: Male Day: 8 Relative to Start Date

| Mid Dose | Kidneys/BrWt | Liver  | Liver/BWt | Liver/BrWt | Lung  | Lung/BWt | Lung/BrWt |
|----------|--------------|--------|-----------|------------|-------|----------|-----------|
|          | (ratio)      | (g)    | (%)       | (ratio)    | (g)   | (%)      | (ratio)   |
| 3006     | 1.5393       | 15.183 | 4.6861    | 7.8062     | 1.617 | 0.4991   | 0.8314    |
| 3007     | 1.4315       | 13.171 | 4.1946    | 6.8314     | 1.762 | 0.5611   | 0.9139    |
| 3008     | 1.6614       | 14.740 | 4.3609    | 7.7497     | 1.830 | 0.5414   | 0.9621    |
| 3009     | 1.4872       | 12.856 | 4.0555    | 6.3455     | 1.921 | 0.6060   | 0.9482    |
| 3010     | 1.5125       | 12.729 | 4.1328    | 6.3837     | 1.731 | 0.5620   | 0.8681    |

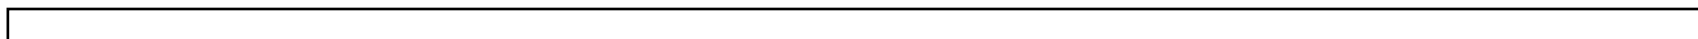

2759-001  
 A Single Dose Toxicity Study of Test Article Administered by Intrathecal Injection in Rats

Individual Organ Weight Values  
 Day 8

Sex: Male Day: 8 Relative to Start Date

| Mid Dose | Pituitary<br>(fixed)<br>(g) | Pituitary<br>(fixed)/BWt<br>(%) | Pituitary<br>(fixed)/BrWt<br>(ratio) | Prostate<br>gland<br>(g) | Prostate<br>gland/BWt<br>(%) | Prostate<br>gland/BrWt<br>(ratio) | Sal, mand/<br>sub., rt<br>(g) |
|----------|-----------------------------|---------------------------------|--------------------------------------|--------------------------|------------------------------|-----------------------------------|-------------------------------|
| 3006     | 0.0145                      | 0.0045                          | 0.0075                               | 0.563                    | 0.1738                       | 0.2895                            | 0.301                         |
| 3007     | 0.0155                      | 0.0049                          | 0.0080                               | 0.524                    | 0.1669                       | 0.2718                            | 0.291                         |
| 3008     | 0.0164                      | 0.0049                          | 0.0086                               | 0.827                    | 0.2447                       | 0.4348                            | 0.322                         |
| 3009     | 0.0146                      | 0.0046                          | 0.0072                               | 0.964                    | 0.3041                       | 0.4758                            | 0.351                         |
| 3010     | 0.0133                      | 0.0043                          | 0.0067                               | 0.569                    | 0.1847                       | 0.2854                            | 0.321                         |

2759-001  
A Single Dose Toxicity Study of Test Article Administered by Intrathecal Injection in Rats

Individual Organ Weight Values  
Day 8

Sex: Male Day: 8 Relative to Start Date

| Mid Dose | Sal gl mand/<br>sub., rt/BWt<br>(%) | Sal gl mand/<br>sub.,rt/BrWt<br>(ratio) | Spleen<br>(g) | Spleen/BWt<br>(%) | Spleen/BrWt<br>(ratio) | Testes<br>(g) | Testes/BWt<br>(%) |
|----------|-------------------------------------|-----------------------------------------|---------------|-------------------|------------------------|---------------|-------------------|
|          | 3006                                | 0.0929                                  | 0.1548        | 0.838             | 0.2586                 | 0.4308        | 3.169             |
| 3007     | 0.0927                              | 0.1509                                  | 0.885         | 0.2818            | 0.4590                 | 3.037         | 0.9672            |
| 3008     | 0.0953                              | 0.1693                                  | 0.859         | 0.2541            | 0.4516                 | 3.535         | 1.0459            |
| 3009     | 0.1107                              | 0.1732                                  | 0.852         | 0.2688            | 0.4205                 | 3.525         | 1.1120            |
| 3010     | 0.1042                              | 0.1610                                  | 0.815         | 0.2646            | 0.4087                 | 3.422         | 1.1110            |

2759-001  
A Single Dose Toxicity Study of Test Article Administered by Intrathecal Injection in Rats

Individual Organ Weight Values  
Day 8

Sex: Male Day: 8 Relative to Start Date

| Mid Dose | Testes/BrWt | Thymus | Thymus/BWt | Thymus/BrWt | Thyroid/para<br>(fixed) | Thyroid/para<br>(fixed)/BWt | Thyroid/para<br>(fixed)/BrWt |
|----------|-------------|--------|------------|-------------|-------------------------|-----------------------------|------------------------------|
|          | (ratio)     | (g)    | (%)        | (ratio)     | (g)                     | (%)                         | (ratio)                      |
| 3006     | 1.6293      | 0.636  | 0.1963     | 0.3270      | 0.0256                  | 0.0079                      | 0.0132                       |
| 3007     | 1.5752      | 0.792  | 0.2522     | 0.4108      | 0.0249                  | 0.0079                      | 0.0129                       |
| 3008     | 1.8586      | 0.585  | 0.1731     | 0.3076      | 0.0183                  | 0.0054                      | 0.0096                       |
| 3009     | 1.7399      | 0.723  | 0.2281     | 0.3569      | 0.0225                  | 0.0071                      | 0.0111                       |
| 3010     | 1.7161      | 0.687  | 0.2231     | 0.3445      | 0.0258                  | 0.0084                      | 0.0129                       |

2759-001  
 A Single Dose Toxicity Study of Test Article Administered by Intrathecal Injection in Rats

Individual Organ Weight Values  
 Day 8

Sex: Male Day: 8 Relative to Start Date

| High Dose | Body Weight (g) | Brain (g) | Brain/BWt (%) | Adrenal glands (g) | Adrenal gl/ BWt (%) | Adrenal gl/ BrWt (ratio) | Epididymides (g) |
|-----------|-----------------|-----------|---------------|--------------------|---------------------|--------------------------|------------------|
| 4006      | 293             | 1.967     | 0.6713        | 0.043              | 0.0147              | 0.0219                   | 0.627            |
| 4007      | 329             | 2.018     | 0.6134        | 0.069              | 0.0210              | 0.0342                   | 0.732            |
| 4008      | 318             | 2.043     | 0.6425        | 0.062              | 0.0195              | 0.0303                   | 0.670            |
| 4009      | 316             | 1.980     | 0.6266        | 0.074              | 0.0234              | 0.0374                   | 0.733            |
| 4010      | 296             | 1.791     | 0.6051        | 0.056              | 0.0189              | 0.0313                   | 0.796            |

2759-001  
A Single Dose Toxicity Study of Test Article Administered by Intrathecal Injection in Rats

Individual Organ Weight Values  
Day 8

Sex: Male Day: 8 Relative to Start Date

| High Dose | Epididymides | Epididymides  | Heart | Heart/BWt | Heart/BrWt | Kidneys | Kidneys/BWt |
|-----------|--------------|---------------|-------|-----------|------------|---------|-------------|
|           | /BWt (%)     | /BrWt (ratio) | (g)   | (%)       | (ratio)    | (g)     | (%)         |
| 4006      | 0.2140       | 0.3188        | 1.293 | 0.4413    | 0.6573     | 2.532   | 0.8642      |
| 4007      | 0.2225       | 0.3627        | 1.772 | 0.5386    | 0.8781     | 3.280   | 0.9970      |
| 4008      | 0.2107       | 0.3279        | 1.940 | 0.6101    | 0.9496     | 2.892   | 0.9094      |
| 4009      | 0.2320       | 0.3702        | 1.292 | 0.4089    | 0.6525     | 3.016   | 0.9544      |
| 4010      | 0.2689       | 0.4444        | 1.278 | 0.4318    | 0.7136     | 2.751   | 0.9294      |



2759-001  
 A Single Dose Toxicity Study of Test Article Administered by Intrathecal Injection in Rats

Individual Organ Weight Values  
 Day 8

Sex: Male Day: 8 Relative to Start Date

| High Dose | Kidneys/BrWt | Liver  | Liver/BWt | Liver/BrWt | Lung  | Lung/BWt | Lung/BrWt |
|-----------|--------------|--------|-----------|------------|-------|----------|-----------|
|           | (ratio)      | (g)    | (%)       | (ratio)    | (g)   | (%)      | (ratio)   |
| 4006      | 1.2872       | 11.134 | 3.8000    | 5.6604     | 1.474 | 0.5031   | 0.7494    |
| 4007      | 1.6254       | 14.767 | 4.4884    | 7.3176     | 1.938 | 0.5891   | 0.9604    |
| 4008      | 1.4156       | 13.242 | 4.1642    | 6.4816     | 1.824 | 0.5736   | 0.8928    |
| 4009      | 1.5232       | 13.510 | 4.2753    | 6.8232     | 1.889 | 0.5978   | 0.9540    |
| 4010      | 1.5360       | 12.224 | 4.1297    | 6.8252     | 1.536 | 0.5189   | 0.8576    |



2759-001  
A Single Dose Toxicity Study of Test Article Administered by Intrathecal Injection in Rats

Individual Organ Weight Values  
Day 8

Sex: Male Day: 8 Relative to Start Date

| High Dose | Pituitary<br>(fixed)<br>(g) | Pituitary<br>(fixed)/BWt<br>(%) | Pituitary<br>(fixed)/BrWt<br>(ratio) | Prostate<br>gland<br>(g) | Prostate<br>gland/BWt<br>(%) | Prostate<br>gland/BrWt<br>(ratio) | Sal, mand/<br>sub., rt<br>(g) |
|-----------|-----------------------------|---------------------------------|--------------------------------------|--------------------------|------------------------------|-----------------------------------|-------------------------------|
| 4006      | 0.0169                      | 0.0058                          | 0.0086                               | 0.595                    | 0.2031                       | 0.3025                            | 0.269                         |
| 4007      | 0.0152                      | 0.0046                          | 0.0075                               | 0.628                    | 0.1909                       | 0.3112                            | 0.327                         |
| 4008      | 0.0133                      | 0.0042                          | 0.0065                               | 0.820                    | 0.2579                       | 0.4014                            | 0.294                         |
| 4009      | 0.0159                      | 0.0050                          | 0.0080                               | 0.617                    | 0.1953                       | 0.3116                            | 0.324                         |
| 4010      | 0.0112                      | 0.0038                          | 0.0063                               | 0.757                    | 0.2557                       | 0.4227                            | 0.298                         |

2759-001  
A Single Dose Toxicity Study of Test Article Administered by Intrathecal Injection in Rats

Individual Organ Weight Values  
Day 8

Sex: Male Day: 8 Relative to Start Date

| High Dose | Sal gl mand/<br>sub., rt/BWt<br>(%) | Sal gl mand/<br>sub.,rt/BrWt<br>(ratio) | Spleen<br>(g) | Spleen/BWt<br>(%) | Spleen/BrWt<br>(ratio) | Testes<br>(g) | Testes/BWt<br>(%) |
|-----------|-------------------------------------|-----------------------------------------|---------------|-------------------|------------------------|---------------|-------------------|
|           | 4006                                | 0.0918                                  | 0.1368        | 0.828             | 0.2826                 | 0.4209        | 3.252             |
| 4007      | 0.0994                              | 0.1620                                  | 1.032         | 0.3137            | 0.5114                 | 3.088         | 0.9386            |
| 4008      | 0.0925                              | 0.1439                                  | 0.913         | 0.2871            | 0.4469                 | 3.421         | 1.0758            |
| 4009      | 0.1025                              | 0.1636                                  | 0.778         | 0.2462            | 0.3929                 | 3.158         | 0.9994            |
| 4010      | 0.1007                              | 0.1664                                  | 0.935         | 0.3159            | 0.5221                 | 3.262         | 1.1020            |

2759-001  
A Single Dose Toxicity Study of Test Article Administered by Intrathecal Injection in Rats

Individual Organ Weight Values  
Day 8

Sex: Male Day: 8 Relative to Start Date

| High Dose | Testes/BrWt | Thymus | Thymus/BWt | Thymus/BrWt | Thyroid/para<br>(fixed) | Thyroid/para<br>(fixed)/BWt | Thyroid/para<br>(fixed)/BrWt |
|-----------|-------------|--------|------------|-------------|-------------------------|-----------------------------|------------------------------|
|           | (ratio)     | (g)    | (%)        | (ratio)     | (g)                     | (%)                         | (ratio)                      |
| 4006      | 1.6533      | 0.729  | 0.2488     | 0.3706      | 0.0258                  | 0.0088                      | 0.0131                       |
| 4007      | 1.5302      | 0.777  | 0.2362     | 0.3850      | 0.0249                  | 0.0076                      | 0.0123                       |
| 4008      | 1.6745      | 0.890  | 0.2799     | 0.4356      | 0.0148                  | 0.0047                      | 0.0072                       |
| 4009      | 1.5949      | 0.501  | 0.1585     | 0.2530      | 0.0198                  | 0.0063                      | 0.0100                       |
| 4010      | 1.8213      | 0.476  | 0.1608     | 0.2658      | 0.0255                  | 0.0086                      | 0.0142                       |



2759-001  
A Single Dose Toxicity Study of Test Article Administered by Intrathecal Injection in Rats

Individual Organ Weight Values  
Day 8

Sex: Female Day: 8 Relative to Start Date

| Vehicle | Body Weight (g) | Brain (g) | Brain/BWt (%) | Adrenal glands (g) | Adrenal gl/ BWt (%) | Adrenal gl/ BrWt (ratio) | Heart (g) |
|---------|-----------------|-----------|---------------|--------------------|---------------------|--------------------------|-----------|
| 1506    | 191             | 1.888     | 0.9885        | 0.051              | 0.0267              | 0.0270                   | 0.925     |
| 1507    | 196             | 1.731     | 0.8832        | 0.057              | 0.0291              | 0.0329                   | 0.836     |
| 1508    | 173             | 1.904     | 1.1006        | 0.073              | 0.0422              | 0.0383                   | 1.287     |
| 1509    | 207             | 1.809     | 0.8739        | 0.071              | 0.0343              | 0.0392                   | 0.981     |
| 1510    | 190             | 1.791     | 0.9426        | 0.080              | 0.0421              | 0.0447                   | 0.841     |

2759-001  
 A Single Dose Toxicity Study of Test Article Administered by Intrathecal Injection in Rats

Individual Organ Weight Values  
 Day 8

Sex: Female Day: 8 Relative to Start Date

| Vehicle | Heart/BWt | Heart/BrWt | Kidneys | Kidneys/BWt | Kidneys/BrWt | Liver | Liver/BWt |
|---------|-----------|------------|---------|-------------|--------------|-------|-----------|
|         | (%)       | (ratio)    | (g)     | (%)         | (ratio)      | (g)   | (%)       |
| 1506    | 0.4843    | 0.4899     | 2.013   | 1.0539      | 1.0662       | 8.773 | 4.5932    |
| 1507    | 0.4265    | 0.4830     | 1.874   | 0.9561      | 1.0826       | 8.072 | 4.1184    |
| 1508    | 0.7439    | 0.6759     | 1.834   | 1.0601      | 0.9632       | 7.789 | 4.5023    |
| 1509    | 0.4739    | 0.5423     | 1.917   | 0.9261      | 1.0597       | 8.707 | 4.2063    |
| 1510    | 0.4426    | 0.4696     | 1.722   | 0.9063      | 0.9615       | 7.373 | 3.8805    |

2759-001  
 A Single Dose Toxicity Study of Test Article Administered by Intrathecal Injection in Rats

Individual Organ Weight Values  
 Day 8

Sex: Female Day: 8 Relative to Start Date

| Vehicle | Liver/BrWt | Lung  | Lung/BWt | Lung/BrWt | Ovaries | Ovaries/BWt | Ovaries/BrWt |
|---------|------------|-------|----------|-----------|---------|-------------|--------------|
|         | (ratio)    | (g)   | (%)      | (ratio)   | (g)     | (%)         | (ratio)      |
| 1506    | 4.6467     | 1.263 | 0.6613   | 0.6690    | 0.085   | 0.0445      | 0.0450       |
| 1507    | 4.6632     | 1.188 | 0.6061   | 0.6863    | 0.071   | 0.0362      | 0.0410       |
| 1508    | 4.0909     | 1.119 | 0.6468   | 0.5877    | 0.116   | 0.0671      | 0.0609       |
| 1509    | 4.8132     | 1.467 | 0.7087   | 0.8109    | 0.076   | 0.0367      | 0.0420       |
| 1510    | 4.1167     | 1.119 | 0.5889   | 0.6248    | 0.092   | 0.0484      | 0.0514       |

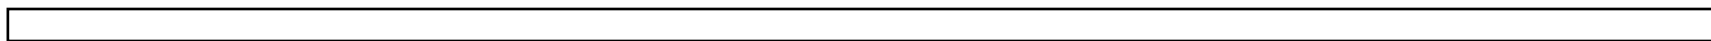

2759-001  
A Single Dose Toxicity Study of Test Article Administered by Intrathecal Injection in Rats

Individual Organ Weight Values  
Day 8

Sex: Female Day: 8 Relative to Start Date

| Vehicle | Oviducts<br>(g) | Oviducts/BWt<br>(%) | Oviducts/<br>BrWt<br>(ratio) | Pituitary<br>(fixed)<br>(g) | Pituitary<br>(fixed)/BWt<br>(%) | Pituitary<br>(fixed)/BrWt<br>(ratio) | Sal, mand/<br>sub., rt<br>(g) |
|---------|-----------------|---------------------|------------------------------|-----------------------------|---------------------------------|--------------------------------------|-------------------------------|
| 1506    | 0.012           | 0.0063              | 0.0064                       | 0.0185                      | 0.0097                          | 0.0098                               | 0.148                         |
| 1507    | 0.018           | 0.0092              | 0.0104                       | 0.0201                      | 0.0103                          | 0.0116                               | 0.453                         |
| 1508    | 0.022           | 0.0127              | 0.0116                       | 0.0171                      | 0.0099                          | 0.0090                               | 0.208                         |
| 1509    | 0.027           | 0.0130              | 0.0149                       | 0.0153                      | 0.0074                          | 0.0085                               | 0.199                         |
| 1510    | 0.024           | 0.0126              | 0.0134                       | 0.0157                      | 0.0083                          | 0.0088                               | 0.198                         |



2759-001  
 A Single Dose Toxicity Study of Test Article Administered by Intrathecal Injection in Rats

Individual Organ Weight Values  
 Day 8

Sex: Female Day: 8 Relative to Start Date

| Vehicle | Sal gl mand/<br>sub., rt/BWt<br>(%) | Sal gl mand/<br>sub.,rt/BrWt<br>(ratio) | Spleen<br>(g) | Spleen/BWt<br>(%) | Spleen/BrWt<br>(ratio) | Thymus<br>(g) | Thymus/BWt<br>(%) |
|---------|-------------------------------------|-----------------------------------------|---------------|-------------------|------------------------|---------------|-------------------|
| 1506    | 0.0775                              | 0.0784                                  | 0.467         | 0.2445            | 0.2474                 | 0.552         | 0.2890            |
| 1507    | 0.2311                              | 0.2617                                  | 0.497         | 0.2536            | 0.2871                 | 0.801         | 0.4087            |
| 1508    | 0.1202                              | 0.1092                                  | 0.447         | 0.2584            | 0.2348                 | 0.607         | 0.3509            |
| 1509    | 0.0961                              | 0.1100                                  | 0.497         | 0.2401            | 0.2747                 | 0.549         | 0.2652            |
| 1510    | 0.1042                              | 0.1106                                  | 0.406         | 0.2137            | 0.2267                 | 0.436         | 0.2295            |

2759-001  
A Single Dose Toxicity Study of Test Article Administered by Intrathecal Injection in Rats

Individual Organ Weight Values  
Day 8

Sex: Female Day: 8 Relative to Start Date

| Vehicle | Thymus/BrWt<br>(ratio) | Thyroid/para<br>(fixed)<br>(g) | Thyroid/para<br>(fixed)/BWt<br>(%) | Thyroid/para<br>(fixed)/BrWt<br>(ratio) | Uterus w/<br>cervix<br>(g) | Uterus w/<br>cervix/BWt<br>(%) | Uterus w/<br>cervix/BrWt<br>(ratio) |
|---------|------------------------|--------------------------------|------------------------------------|-----------------------------------------|----------------------------|--------------------------------|-------------------------------------|
| 1506    | 0.2924                 | 0.0234                         | 0.0123                             | 0.0124                                  | 0.392                      | 0.2052                         | 0.2076                              |
| 1507    | 0.4627                 | 0.0216                         | 0.0110                             | 0.0125                                  | 0.852                      | 0.4347                         | 0.4922                              |
| 1508    | 0.3188                 | 0.0192                         | 0.0111                             | 0.0101                                  | 0.499                      | 0.2884                         | 0.2621                              |
| 1509    | 0.3035                 | 0.0176                         | 0.0085                             | 0.0097                                  | 0.433                      | 0.2092                         | 0.2394                              |
| 1510    | 0.2434                 | 0.0173                         | 0.0091                             | 0.0097                                  | 0.283                      | 0.1489                         | 0.1580                              |

2759-001  
A Single Dose Toxicity Study of Test Article Administered by Intrathecal Injection in Rats

Individual Organ Weight Values  
Day 8

Sex: Female Day: 8 Relative to Start Date

| Low Dose | Body Weight (g) | Brain (g) | Brain/BWt (%) | Adrenal glands (g) | Adrenal gl/ BWt (%) | Adrenal gl/ BrWt (ratio) | Heart (g) |
|----------|-----------------|-----------|---------------|--------------------|---------------------|--------------------------|-----------|
| 2506     | 206             | 1.835     | 0.8908        | 0.059              | 0.0286              | 0.0322                   | 0.828     |
| 2507     | 216             | 1.884     | 0.8722        | 0.054              | 0.0250              | 0.0287                   | 0.872     |
| 2508     | 192             | 1.877     | 0.9776        | 0.066              | 0.0344              | 0.0352                   | 0.933     |
| 2509     | 177             | 1.857     | 1.0492        | 0.051              | 0.0288              | 0.0275                   | 0.805     |
| 2510     | 189             | 1.881     | 0.9952        | 0.056              | 0.0296              | 0.0298                   | 0.783     |

2759-001  
A Single Dose Toxicity Study of Test Article Administered by Intrathecal Injection in Rats

Individual Organ Weight Values  
Day 8

Sex: Female Day: 8 Relative to Start Date

| Low Dose | Heart/BWt | Heart/BrWt | Kidneys | Kidneys/BWt | Kidneys/BrWt | Liver | Liver/BWt |
|----------|-----------|------------|---------|-------------|--------------|-------|-----------|
|          | (%)       | (ratio)    | (g)     | (%)         | (ratio)      | (g)   | (%)       |
| 2506     | 0.4019    | 0.4512     | 1.809   | 0.8782      | 0.9858       | 7.864 | 3.8175    |
| 2507     | 0.4037    | 0.4628     | 2.080   | 0.9630      | 1.1040       | 8.388 | 3.8833    |
| 2508     | 0.4859    | 0.4971     | 2.052   | 1.0688      | 1.0932       | 8.274 | 4.3094    |
| 2509     | 0.4548    | 0.4335     | 1.742   | 0.9842      | 0.9381       | 7.244 | 4.0927    |
| 2510     | 0.4143    | 0.4163     | 1.790   | 0.9471      | 0.9516       | 7.059 | 3.7349    |

2759-001  
 A Single Dose Toxicity Study of Test Article Administered by Intrathecal Injection in Rats

Individual Organ Weight Values  
 Day 8

Sex: Female Day: 8 Relative to Start Date

| Low Dose | Liver/BrWt | Lung  | Lung/BWt | Lung/BrWt | Ovaries | Ovaries/BWt | Ovaries/BrWt |
|----------|------------|-------|----------|-----------|---------|-------------|--------------|
|          | (ratio)    | (g)   | (%)      | (ratio)   | (g)     | (%)         | (ratio)      |
| 2506     | 4.2856     | 1.474 | 0.7155   | 0.8033    | 0.057   | 0.0277      | 0.0311       |
| 2507     | 4.4522     | 1.212 | 0.5611   | 0.6433    | 0.071   | 0.0329      | 0.0377       |
| 2508     | 4.4081     | 1.163 | 0.6057   | 0.6196    | 0.088   | 0.0458      | 0.0469       |
| 2509     | 3.9009     | 1.192 | 0.6734   | 0.6419    | 0.063   | 0.0356      | 0.0339       |
| 2510     | 3.7528     | 1.143 | 0.6048   | 0.6077    | 0.059   | 0.0312      | 0.0314       |

2759-001  
 A Single Dose Toxicity Study of Test Article Administered by Intrathecal Injection in Rats

Individual Organ Weight Values  
 Day 8

Sex: Female Day: 8 Relative to Start Date

| Low Dose | Oviducts | Oviducts/BWt | Oviducts/<br>BrWt | Pituitary<br>(fixed) | Pituitary<br>(fixed)/BWt | Pituitary<br>(fixed)/BrWt | Sal, mand/<br>sub., rt |
|----------|----------|--------------|-------------------|----------------------|--------------------------|---------------------------|------------------------|
|          | (g)      | (%)          | (ratio)           | (g)                  | (%)                      | (ratio)                   | (g)                    |
| 2506     | 0.021    | 0.0102       | 0.0114            | 0.0147               | 0.0071                   | 0.0080                    | 0.203                  |
| 2507     | 0.025    | 0.0116       | 0.0133            | 0.0174               | 0.0081                   | 0.0092                    | 0.181                  |
| 2508     | 0.025    | 0.0130       | 0.0133            | 0.0194               | 0.0101                   | 0.0103                    | 0.197                  |
| 2509     | 0.024    | 0.0136       | 0.0129            | 0.0151               | 0.0085                   | 0.0081                    | 0.166                  |
| 2510     | 0.023    | 0.0122       | 0.0122            | 0.0204               | 0.0108                   | 0.0108                    | 0.192                  |

2759-001  
A Single Dose Toxicity Study of Test Article Administered by Intrathecal Injection in Rats

Individual Organ Weight Values  
Day 8

Sex: Female Day: 8 Relative to Start Date

| Low Dose | Sal gl mand/<br>sub., rt/BWt<br>(%) | Sal gl mand/<br>sub.,rt/BrWt<br>(ratio) | Spleen<br>(g) | Spleen/BWt<br>(%) | Spleen/BrWt<br>(ratio) | Thymus<br>(g) | Thymus/BWt<br>(%) |
|----------|-------------------------------------|-----------------------------------------|---------------|-------------------|------------------------|---------------|-------------------|
|          | 2506                                | 0.0985                                  | 0.1106        | 0.476             | 0.2311                 | 0.2594        | 0.563             |
| 2507     | 0.0838                              | 0.0961                                  | 0.647         | 0.2995            | 0.3434                 | 0.410         | 0.1898            |
| 2508     | 0.1026                              | 0.1050                                  | 0.467         | 0.2432            | 0.2488                 | 0.601         | 0.3130            |
| 2509     | 0.0938                              | 0.0894                                  | 0.397         | 0.2243            | 0.2138                 | 0.436         | 0.2463            |
| 2510     | 0.1016                              | 0.1021                                  | 0.449         | 0.2376            | 0.2387                 | 0.551         | 0.2915            |

2759-001  
 A Single Dose Toxicity Study of Test Article Administered by Intrathecal Injection in Rats

Individual Organ Weight Values  
 Day 8

Sex: Female Day: 8 Relative to Start Date

| Low Dose | Thymus/BrWt<br>(ratio) | Thyroid/para<br>(fixed)<br>(g) | Thyroid/para<br>(fixed)/BWt<br>(%) | Thyroid/para<br>(fixed)/BrWt<br>(ratio) | Uterus w/<br>cervix<br>(g) | Uterus w/<br>cervix/BWt<br>(%) | Uterus w/<br>cervix/BrWt<br>(ratio) |
|----------|------------------------|--------------------------------|------------------------------------|-----------------------------------------|----------------------------|--------------------------------|-------------------------------------|
| 2506     | 0.3068                 | 0.0198                         | 0.0096                             | 0.0108                                  | 0.879                      | 0.4267                         | 0.4790                              |
| 2507     | 0.2176                 | 0.0197                         | 0.0091                             | 0.0105                                  | 0.333                      | 0.1542                         | 0.1768                              |
| 2508     | 0.3202                 | 0.0173                         | 0.0090                             | 0.0092                                  | 0.391                      | 0.2036                         | 0.2083                              |
| 2509     | 0.2348                 | 0.0205                         | 0.0116                             | 0.0110                                  | 0.441                      | 0.2492                         | 0.2375                              |
| 2510     | 0.2929                 | 0.0194                         | 0.0103                             | 0.0103                                  | 0.451                      | 0.2386                         | 0.2398                              |



2759-001  
 A Single Dose Toxicity Study of Test Article Administered by Intrathecal Injection in Rats

Individual Organ Weight Values  
 Day 8

Sex: Female Day: 8 Relative to Start Date

| Mid Dose | Body Weight (g) | Brain (g) | Brain/BWt (%) | Adrenal glands (g) | Adrenal gl/ BWt (%) | Adrenal gl/ BrWt (ratio) | Heart (g) |
|----------|-----------------|-----------|---------------|--------------------|---------------------|--------------------------|-----------|
| 3506     | 204             | 1.865     | 0.9142        | 0.066              | 0.0324              | 0.0354                   | 0.760     |
| 3507     | 193             | 1.882     | 0.9751        | 0.055              | 0.0285              | 0.0292                   | 0.851     |
| 3508     | 185             | 1.793     | 0.9692        | 0.072              | 0.0389              | 0.0402                   | 0.755     |
| 3509     | 195             | 1.729     | 0.8867        | 0.065              | 0.0333              | 0.0376                   | 0.837     |
| 3510     | 192             | 1.931     | 1.0057        | 0.099              | 0.0516              | 0.0513                   | 0.960     |

2759-001  
 A Single Dose Toxicity Study of Test Article Administered by Intrathecal Injection in Rats

Individual Organ Weight Values  
 Day 8

Sex: Female Day: 8 Relative to Start Date

| Mid Dose | Heart/BWt | Heart/BrWt | Kidneys | Kidneys/BWt | Kidneys/BrWt | Liver | Liver/BWt |
|----------|-----------|------------|---------|-------------|--------------|-------|-----------|
|          | (%)       | (ratio)    | (g)     | (%)         | (ratio)      | (g)   | (%)       |
| 3506     | 0.3725    | 0.4075     | 1.848   | 0.9059      | 0.9909       | 7.872 | 3.8588    |
| 3507     | 0.4409    | 0.4522     | 1.944   | 1.0073      | 1.0329       | 8.548 | 4.4290    |
| 3508     | 0.4081    | 0.4211     | 1.854   | 1.0022      | 1.0340       | 8.355 | 4.5162    |
| 3509     | 0.4292    | 0.4841     | 1.859   | 0.9533      | 1.0752       | 8.695 | 4.4590    |
| 3510     | 0.5000    | 0.4972     | 1.912   | 0.9958      | 0.9902       | 8.510 | 4.4323    |

2759-001  
 A Single Dose Toxicity Study of Test Article Administered by Intrathecal Injection in Rats

Individual Organ Weight Values  
 Day 8

Sex: Female Day: 8 Relative to Start Date

| Mid Dose | Liver/BrWt | Lung  | Lung/BWt | Lung/BrWt | Ovaries | Ovaries/BWt | Ovaries/BrWt |
|----------|------------|-------|----------|-----------|---------|-------------|--------------|
|          | (ratio)    | (g)   | (%)      | (ratio)   | (g)     | (%)         | (ratio)      |
| 3506     | 4.2209     | 1.120 | 0.5490   | 0.6005    | 0.070   | 0.0343      | 0.0375       |
| 3507     | 4.5420     | 1.109 | 0.5746   | 0.5893    | 0.065   | 0.0337      | 0.0345       |
| 3508     | 4.6598     | 1.059 | 0.5724   | 0.5906    | 0.088   | 0.0476      | 0.0491       |
| 3509     | 5.0289     | 1.203 | 0.6169   | 0.6958    | 0.100   | 0.0513      | 0.0578       |
| 3510     | 4.4070     | 1.517 | 0.7901   | 0.7856    | 0.099   | 0.0516      | 0.0513       |

2759-001  
A Single Dose Toxicity Study of Test Article Administered by Intrathecal Injection in Rats

Individual Organ Weight Values  
Day 8

Sex: Female Day: 8 Relative to Start Date

| Mid Dose | Oviducts | Oviducts/BWt | Oviducts/<br>BrWt | Pituitary<br>(fixed) | Pituitary<br>(fixed)/BWt | Pituitary<br>(fixed)/BrWt | Sal, mand/<br>sub., rt |
|----------|----------|--------------|-------------------|----------------------|--------------------------|---------------------------|------------------------|
|          | (g)      | (%)          | (ratio)           | (g)                  | (%)                      | (ratio)                   | (g)                    |
| 3506     | 0.025    | 0.0123       | 0.0134            | 0.0198               | 0.0097                   | 0.0106                    | 0.215                  |
| 3507     | 0.017    | 0.0088       | 0.0090            | 0.0172               | 0.0089                   | 0.0091                    | 0.170                  |
| 3508     | 0.028    | 0.0151       | 0.0156            | 0.0146               | 0.0079                   | 0.0081                    | 0.197                  |
| 3509     | 0.027    | 0.0138       | 0.0156            | 0.0169               | 0.0087                   | 0.0098                    | 0.196                  |
| 3510     | 0.038    | 0.0198       | 0.0197            | 0.0191               | 0.0099                   | 0.0099                    | 0.202                  |

2759-001  
 A Single Dose Toxicity Study of Test Article Administered by Intrathecal Injection in Rats

Individual Organ Weight Values  
 Day 8

Sex: Female Day: 8 Relative to Start Date

| Mid Dose | Sal gl mand/<br>sub., rt/BWt<br>(%) | Sal gl mand/<br>sub.,rt/BrWt<br>(ratio) | Spleen<br>(g) | Spleen/BWt<br>(%) | Spleen/BrWt<br>(ratio) | Thymus<br>(g) | Thymus/BWt<br>(%) |
|----------|-------------------------------------|-----------------------------------------|---------------|-------------------|------------------------|---------------|-------------------|
|          | 3506                                | 0.1054                                  | 0.1153        | 0.566             | 0.2775                 | 0.3035        | 0.647             |
| 3507     | 0.0881                              | 0.0903                                  | 0.558         | 0.2891            | 0.2965                 | 0.730         | 0.3782            |
| 3508     | 0.1065                              | 0.1099                                  | 0.551         | 0.2978            | 0.3073                 | 0.436         | 0.2357            |
| 3509     | 0.1005                              | 0.1134                                  | 0.449         | 0.2303            | 0.2597                 | 0.541         | 0.2774            |
| 3510     | 0.1052                              | 0.1046                                  | 0.462         | 0.2406            | 0.2393                 | 0.463         | 0.2411            |

2759-001  
 A Single Dose Toxicity Study of Test Article Administered by Intrathecal Injection in Rats

Individual Organ Weight Values  
 Day 8

Sex: Female Day: 8 Relative to Start Date

| Mid Dose | Thymus/BrWt | Thyroid/para   | Thyroid/para       | Thyroid/para            | Uterus w/     | Uterus w/         | Uterus w/              |
|----------|-------------|----------------|--------------------|-------------------------|---------------|-------------------|------------------------|
|          | (ratio)     | (fixed)<br>(g) | (fixed)/BWt<br>(%) | (fixed)/BrWt<br>(ratio) | cervix<br>(g) | cervix/BWt<br>(%) | cervix/BrWt<br>(ratio) |
| 3506     | 0.3469      | 0.0257         | 0.0126             | 0.0138                  | 0.377         | 0.1848            | 0.2021                 |
| 3507     | 0.3879      | 0.0156         | 0.0081             | 0.0083                  | 0.891         | 0.4617            | 0.4734                 |
| 3508     | 0.2432      | 0.0280         | 0.0151             | 0.0156                  | 0.493         | 0.2665            | 0.2750                 |
| 3509     | 0.3129      | 0.0183         | 0.0094             | 0.0106                  | 0.436         | 0.2236            | 0.2522                 |
| 3510     | 0.2398      | 0.0180         | 0.0094             | 0.0093                  | 0.414         | 0.2156            | 0.2144                 |

2759-001  
 A Single Dose Toxicity Study of Test Article Administered by Intrathecal Injection in Rats

Individual Organ Weight Values  
 Day 8

Sex: Female Day: 8 Relative to Start Date

| High Dose | Body Weight (g) | Brain (g) | Brain/BWt (%) | Adrenal glands (g) | Adrenal gl/ BWt (%) | Adrenal gl/ BrWt (ratio) | Heart (g) |
|-----------|-----------------|-----------|---------------|--------------------|---------------------|--------------------------|-----------|
| 4506      | 176             | 1.769     | 1.0051        | 0.059              | 0.0335              | 0.0334                   | 1.066     |
| 4507      | 169             | 1.684     | 0.9964        | 0.055              | 0.0325              | 0.0327                   | 0.798     |
| 4508      | 191             | 1.909     | 0.9995        | 0.054              | 0.0283              | 0.0283                   | 0.886     |
| 4509      | 197             | 1.993     | 1.0117        | 0.081              | 0.0411              | 0.0406                   | 1.096     |
| 4510      | 195             | 1.814     | 0.9303        | 0.075              | 0.0385              | 0.0413                   | 0.866     |

2759-001  
 A Single Dose Toxicity Study of Test Article Administered by Intrathecal Injection in Rats

Individual Organ Weight Values  
 Day 8

Sex: Female Day: 8 Relative to Start Date

| High Dose | Heart/BWt | Heart/BrWt | Kidneys | Kidneys/BWt | Kidneys/BrWt | Liver | Liver/BWt |
|-----------|-----------|------------|---------|-------------|--------------|-------|-----------|
|           | (%)       | (ratio)    | (g)     | (%)         | (ratio)      | (g)   | (%)       |
| 4506      | 0.6057    | 0.6026     | 1.883   | 1.0699      | 1.0644       | 7.049 | 4.0051    |
| 4507      | 0.4722    | 0.4739     | 1.714   | 1.0142      | 1.0178       | 6.973 | 4.1260    |
| 4508      | 0.4639    | 0.4641     | 1.861   | 0.9743      | 0.9749       | 8.175 | 4.2801    |
| 4509      | 0.5563    | 0.5499     | 1.967   | 0.9985      | 0.9870       | 8.645 | 4.3883    |
| 4510      | 0.4441    | 0.4774     | 2.021   | 1.0364      | 1.1141       | 8.681 | 4.4518    |



2759-001  
 A Single Dose Toxicity Study of Test Article Administered by Intrathecal Injection in Rats

Individual Organ Weight Values  
 Day 8

Sex: Female Day: 8 Relative to Start Date

| High Dose | Liver/BrWt | Lung  | Lung/BWt | Lung/BrWt | Ovaries | Ovaries/BWt | Ovaries/BrWt |
|-----------|------------|-------|----------|-----------|---------|-------------|--------------|
|           | (ratio)    | (g)   | (%)      | (ratio)   | (g)     | (%)         | (ratio)      |
| 4506      | 3.9847     | 1.249 | 0.7097   | 0.7060    | 0.077   | 0.0438      | 0.0435       |
| 4507      | 4.1407     | 1.094 | 0.6473   | 0.6496    | 0.055   | 0.0325      | 0.0327       |
| 4508      | 4.2823     | 1.393 | 0.7293   | 0.7297    | 0.099   | 0.0518      | 0.0519       |
| 4509      | 4.3377     | 1.481 | 0.7518   | 0.7431    | 0.066   | 0.0335      | 0.0331       |
| 4510      | 4.7856     | 1.224 | 0.6277   | 0.6748    | 0.066   | 0.0338      | 0.0364       |

2759-001  
 A Single Dose Toxicity Study of Test Article Administered by Intrathecal Injection in Rats

Individual Organ Weight Values  
 Day 8

Sex: Female Day: 8 Relative to Start Date

| High Dose | Oviducts | Oviducts/BWt | Oviducts/<br>BrWt | Pituitary<br>(fixed) | Pituitary<br>(fixed)/BWt | Pituitary<br>(fixed)/BrWt | Sal, mand/<br>sub., rt |
|-----------|----------|--------------|-------------------|----------------------|--------------------------|---------------------------|------------------------|
|           | (g)      | (%)          | (ratio)           | (g)                  | (%)                      | (ratio)                   | (g)                    |
| 4506      | 0.021    | 0.0119       | 0.0119            | 0.0151               | 0.0086                   | 0.0085                    | 0.176                  |
| 4507      | 0.017    | 0.0101       | 0.0101            | 0.0142               | 0.0084                   | 0.0084                    | 0.142                  |
| 4508      | 0.023    | 0.0120       | 0.0120            | 0.0150               | 0.0079                   | 0.0079                    | 0.184                  |
| 4509      | 0.023    | 0.0117       | 0.0115            | 0.0209               | 0.0106                   | 0.0105                    | 0.212                  |
| 4510      | 0.021    | 0.0108       | 0.0116            | 0.0214               | 0.0110                   | 0.0118                    | 0.227                  |

2759-001  
 A Single Dose Toxicity Study of Test Article Administered by Intrathecal Injection in Rats

Individual Organ Weight Values  
 Day 8

Sex: Female Day: 8 Relative to Start Date

| High Dose | Sal gl mand/<br>sub., rt/BWt<br>(%) | Sal gl mand/<br>sub.,rt/BrWt<br>(ratio) | Spleen<br>(g) | Spleen/BWt<br>(%) | Spleen/BrWt<br>(ratio) | Thymus<br>(g) | Thymus/BWt<br>(%) |
|-----------|-------------------------------------|-----------------------------------------|---------------|-------------------|------------------------|---------------|-------------------|
|           | 4506                                | 0.1000                                  | 0.0995        | 0.519             | 0.2949                 | 0.2934        | 0.576             |
| 4507      | 0.0840                              | 0.0843                                  | 0.423         | 0.2503            | 0.2512                 | 0.432         | 0.2556            |
| 4508      | 0.0963                              | 0.0964                                  | 0.434         | 0.2272            | 0.2273                 | 0.442         | 0.2314            |
| 4509      | 0.1076                              | 0.1064                                  | 0.499         | 0.2533            | 0.2504                 | 0.703         | 0.3569            |
| 4510      | 0.1164                              | 0.1251                                  | 0.429         | 0.2200            | 0.2365                 | 0.642         | 0.3292            |

2759-001  
A Single Dose Toxicity Study of Test Article Administered by Intrathecal Injection in Rats

Individual Organ Weight Values  
Day 8

Sex: Female Day: 8 Relative to Start Date

| High Dose | Thymus/BrWt<br>(ratio) | Thyroid/para<br>(fixed)<br>(g) | Thyroid/para<br>(fixed)/BWt<br>(%) | Thyroid/para<br>(fixed)/BrWt<br>(ratio) | Uterus w/<br>cervix<br>(g) | Uterus w/<br>cervix/BWt<br>(%) | Uterus w/<br>cervix/BrWt<br>(ratio) |
|-----------|------------------------|--------------------------------|------------------------------------|-----------------------------------------|----------------------------|--------------------------------|-------------------------------------|
| 4506      | 0.3256                 | 0.0181                         | 0.0103                             | 0.0102                                  | 0.398                      | 0.2261                         | 0.2250                              |
| 4507      | 0.2565                 | 0.0190                         | 0.0112                             | 0.0113                                  | 0.392                      | 0.2320                         | 0.2328                              |
| 4508      | 0.2315                 | 0.0226                         | 0.0118                             | 0.0118                                  | 0.445                      | 0.2330                         | 0.2331                              |
| 4509      | 0.3527                 | 0.0235                         | 0.0119                             | 0.0118                                  | 0.427                      | 0.2168                         | 0.2142                              |
| 4510      | 0.3539                 | 0.0157                         | 0.0081                             | 0.0087                                  | 0.378                      | 0.1938                         | 0.2084                              |

**Appendix 3**  
**Individual Organ Weight Values (Day 29)**

2759-001  
 A Single Dose Toxicity Study of Test Article Administered by Intrathecal Injection in Rats

Individual Organ Weight Values  
 Day 29

Sex: Male Day: 29 Relative to Start Date

| Vehicle | Body Weight (g) | Brain (g) | Brain/BWt (%) | Adrenal glands (g) | Adrenal gl/ BWt (%) | Adrenal gl/ BrWt (ratio) | Epididymides (g) |
|---------|-----------------|-----------|---------------|--------------------|---------------------|--------------------------|------------------|
| 1011    | 443             | 2.155     | 0.4865        | 0.084              | 0.0190              | 0.0390                   | 1.364            |
| 1012    | 440             | 2.169     | 0.4930        | 0.085              | 0.0193              | 0.0392                   | 1.407            |
| 1013    | 428             | 2.034     | 0.4752        | 0.068              | 0.0159              | 0.0334                   | 1.301            |
| 1014    | 420             | 2.090     | 0.4976        | 0.076              | 0.0181              | 0.0364                   | 1.438            |
| 1015    | 393             | 1.958     | 0.4982        | 0.084              | 0.0214              | 0.0429                   | 1.519            |

2759-001  
 A Single Dose Toxicity Study of Test Article Administered by Intrathecal Injection in Rats

Individual Organ Weight Values  
 Day 29

Sex: Male Day: 29 Relative to Start Date

| Vehicle | Epididymides /BWt (%) | Epididymides /BrWt (ratio) | Heart (g) | Heart/BWt (%) | Heart/BrWt (ratio) | Kidneys (g) | Kidneys/BWt (%) |
|---------|-----------------------|----------------------------|-----------|---------------|--------------------|-------------|-----------------|
| 1011    | 0.3079                | 0.6329                     | 1.477     | 0.3334        | 0.6854             | 3.968       | 0.8957          |
| 1012    | 0.3198                | 0.6487                     | 1.850     | 0.4205        | 0.8529             | 3.771       | 0.8570          |
| 1013    | 0.3040                | 0.6396                     | 1.491     | 0.3484        | 0.7330             | 3.320       | 0.7757          |
| 1014    | 0.3424                | 0.6880                     | 1.519     | 0.3617        | 0.7268             | 3.505       | 0.8345          |
| 1015    | 0.3865                | 0.7758                     | 1.628     | 0.4142        | 0.8315             | 3.885       | 0.9885          |

2759-001  
 A Single Dose Toxicity Study of Test Article Administered by Intrathecal Injection in Rats

Individual Organ Weight Values  
 Day 29

Sex: Male Day: 29 Relative to Start Date

| Vehicle | Kidneys/BrWt | Liver  | Liver/BWt | Liver/BrWt | Lung  | Lung/BWt | Lung/BrWt |
|---------|--------------|--------|-----------|------------|-------|----------|-----------|
|         | (ratio)      | (g)    | (%)       | (ratio)    | (g)   | (%)      | (ratio)   |
| 1011    | 1.8413       | 17.065 | 3.8521    | 7.9188     | 1.629 | 0.3677   | 0.7559    |
| 1012    | 1.7386       | 17.975 | 4.0852    | 8.2872     | 2.141 | 0.4866   | 0.9871    |
| 1013    | 1.6323       | 16.862 | 3.9397    | 8.2901     | 1.651 | 0.3857   | 0.8117    |
| 1014    | 1.6770       | 16.359 | 3.8950    | 7.8273     | 1.607 | 0.3826   | 0.7689    |
| 1015    | 1.9842       | 16.646 | 4.2356    | 8.5015     | 1.898 | 0.4830   | 0.9694    |





2759-001  
 A Single Dose Toxicity Study of Test Article Administered by Intrathecal Injection in Rats

Individual Organ Weight Values  
 Day 29

Sex: Male Day: 29 Relative to Start Date

| Vehicle | Pituitary<br>(fixed)<br>(g) | Pituitary<br>(fixed)/BWt<br>(%) | Pituitary<br>(fixed)/BrWt<br>(ratio) | Prostate<br>gland<br>(g) | Prostate<br>gland/BWt<br>(%) | Prostate<br>gland/BrWt<br>(ratio) | Sal, mand/<br>sub., rt<br>(g) |
|---------|-----------------------------|---------------------------------|--------------------------------------|--------------------------|------------------------------|-----------------------------------|-------------------------------|
| 1011    | 0.0171                      | 0.0039                          | 0.0079                               | 1.295                    | 0.2923                       | 0.6009                            | 0.354                         |
| 1012    | 0.0188                      | 0.0043                          | 0.0087                               | 1.034                    | 0.2350                       | 0.4767                            | 0.403                         |
| 1013    | 0.0169                      | 0.0039                          | 0.0083                               | 0.966                    | 0.2257                       | 0.4749                            | 0.372                         |
| 1014    | 0.0201                      | 0.0048                          | 0.0096                               | 1.193                    | 0.2840                       | 0.5708                            | 0.418                         |
| 1015    | 0.0184                      | 0.0047                          | 0.0094                               | 1.445                    | 0.3677                       | 0.7380                            | 0.434                         |

2759-001  
 A Single Dose Toxicity Study of Test Article Administered by Intrathecal Injection in Rats

Individual Organ Weight Values  
 Day 29

Sex: Male Day: 29 Relative to Start Date

| Vehicle | Sal gl mand/<br>sub., rt/BWt<br>(%) | Sal gl mand/<br>sub.,rt/BrWt<br>(ratio) | Spleen<br>(g) | Spleen/BWt<br>(%) | Spleen/BrWt<br>(ratio) | Testes<br>(g) | Testes/BWt<br>(%) |
|---------|-------------------------------------|-----------------------------------------|---------------|-------------------|------------------------|---------------|-------------------|
| 1011    | 0.0799                              | 0.1643                                  | 0.703         | 0.1587            | 0.3262                 | 3.733         | 0.8427            |
| 1012    | 0.0916                              | 0.1858                                  | 0.900         | 0.2045            | 0.4149                 | 4.087         | 0.9289            |
| 1013    | 0.0869                              | 0.1829                                  | 0.786         | 0.1836            | 0.3864                 | 3.149         | 0.7357            |
| 1014    | 0.0995                              | 0.2000                                  | 0.844         | 0.2010            | 0.4038                 | 3.697         | 0.8802            |
| 1015    | 0.1104                              | 0.2217                                  | 0.852         | 0.2168            | 0.4351                 | 3.801         | 0.9672            |

2759-001  
A Single Dose Toxicity Study of Test Article Administered by Intrathecal Injection in Rats

Individual Organ Weight Values  
Day 29

Sex: Male Day: 29 Relative to Start Date

| Vehicle | Testes/BrWt<br>(ratio) | Thymus<br>(g) | Thymus/BWt<br>(%) | Thymus/BrWt<br>(ratio) | Thyroid/para<br>(fixed)<br>(g) | Thyroid/para<br>(fixed)/BWt<br>(%) | Thyroid/para<br>(fixed)/BrWt<br>(ratio) |
|---------|------------------------|---------------|-------------------|------------------------|--------------------------------|------------------------------------|-----------------------------------------|
| 1011    | 1.7323                 | 0.410         | 0.0926            | 0.1903                 | 0.0352                         | 0.0079                             | 0.0163                                  |
| 1012    | 1.8843                 | 0.668         | 0.1518            | 0.3080                 | 0.0334                         | 0.0076                             | 0.0154                                  |
| 1013    | 1.5482                 | 0.446         | 0.1042            | 0.2193                 | 0.0360                         | 0.0084                             | 0.0177                                  |
| 1014    | 1.7689                 | 0.381         | 0.0907            | 0.1823                 | 0.0309                         | 0.0074                             | 0.0148                                  |
| 1015    | 1.9413                 | 0.407         | 0.1036            | 0.2079                 | 0.0377                         | 0.0096                             | 0.0193                                  |

2759-001  
 A Single Dose Toxicity Study of Test Article Administered by Intrathecal Injection in Rats

Individual Organ Weight Values  
 Day 29

Sex: Male Day: 29 Relative to Start Date

| Low Dose | Body Weight (g) | Brain (g) | Brain/BWt (%) | Adrenal glands (g) | Adrenal gl/ BWt (%) | Adrenal gl/ BrWt (ratio) | Epididymides (g) |
|----------|-----------------|-----------|---------------|--------------------|---------------------|--------------------------|------------------|
| 2011     | 429             | 1.952     | 0.4550        | 0.088              | 0.0205              | 0.0451                   | 1.376            |
| 2012     | 433             | 2.039     | 0.4709        | 0.068              | 0.0157              | 0.0333                   | 1.261            |
| 2013     | 438             | 2.147     | 0.4902        | 0.066              | 0.0151              | 0.0307                   | 1.234            |
| 2014     | 398             | 1.930     | 0.4849        | 0.073              | 0.0183              | 0.0378                   | 1.242            |
| 2015     | 444             | 2.258     | 0.5086        | 0.091              | 0.0205              | 0.0403                   | 1.209            |

2759-001  
 A Single Dose Toxicity Study of Test Article Administered by Intrathecal Injection in Rats

Individual Organ Weight Values  
 Day 29

Sex: Male Day: 29 Relative to Start Date

| Low Dose | Epididymides /BWt (%) | Epididymides /BrWt (ratio) | Heart (g) | Heart/BWt (%) | Heart/BrWt (ratio) | Kidneys (g) | Kidneys/BWt (%) |
|----------|-----------------------|----------------------------|-----------|---------------|--------------------|-------------|-----------------|
| 2011     | 0.3207                | 0.7049                     | 1.593     | 0.3713        | 0.8161             | 3.623       | 0.8445          |
| 2012     | 0.2912                | 0.6184                     | 1.664     | 0.3843        | 0.8161             | 3.627       | 0.8376          |
| 2013     | 0.2817                | 0.5748                     | 1.964     | 0.4484        | 0.9148             | 4.394       | 1.0032          |
| 2014     | 0.3121                | 0.6435                     | 1.663     | 0.4178        | 0.8617             | 3.113       | 0.7822          |
| 2015     | 0.2723                | 0.5354                     | 1.496     | 0.3369        | 0.6625             | 3.488       | 0.7856          |

2759-001  
A Single Dose Toxicity Study of Test Article Administered by Intrathecal Injection in Rats

Individual Organ Weight Values  
Day 29

Sex: Male Day: 29 Relative to Start Date

| Low Dose | Kidneys/BrWt | Liver  | Liver/BWt | Liver/BrWt | Lung  | Lung/BWt | Lung/BrWt |
|----------|--------------|--------|-----------|------------|-------|----------|-----------|
|          | (ratio)      | (g)    | (%)       | (ratio)    | (g)   | (%)      | (ratio)   |
| 2011     | 1.8560       | 16.499 | 3.8459    | 8.4524     | 1.433 | 0.3340   | 0.7341    |
| 2012     | 1.7788       | 16.010 | 3.6975    | 7.8519     | 1.549 | 0.3577   | 0.7597    |
| 2013     | 2.0466       | 18.300 | 4.1781    | 8.5235     | 1.682 | 0.3840   | 0.7834    |
| 2014     | 1.6130       | 13.412 | 3.3698    | 6.9492     | 1.826 | 0.4588   | 0.9461    |
| 2015     | 1.5447       | 15.080 | 3.3964    | 6.6785     | 1.886 | 0.4248   | 0.8353    |

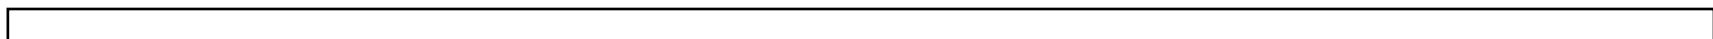

2759-001  
 A Single Dose Toxicity Study of Test Article Administered by Intrathecal Injection in Rats

Individual Organ Weight Values  
 Day 29

Sex: Male Day: 29 Relative to Start Date

| Low Dose | Pituitary (fixed) (g) | Pituitary (fixed)/BWt (%) | Pituitary (fixed)/BrWt (ratio) | Prostate gland (g) | Prostate gland/BWt (%) | Prostate gland/BrWt (ratio) | Sal, mand/ sub., rt (g) |
|----------|-----------------------|---------------------------|--------------------------------|--------------------|------------------------|-----------------------------|-------------------------|
| 2011     | 0.0156                | 0.0036                    | 0.0080                         | 1.336              | 0.3114                 | 0.6844                      | 0.307                   |
| 2012     | 0.0178                | 0.0041                    | 0.0087                         | 1.136              | 0.2624                 | 0.5571                      | 0.337                   |
| 2013     | 0.0213                | 0.0049                    | 0.0099                         | 1.167              | 0.2664                 | 0.5435                      | 0.396                   |
| 2014     | 0.0157                | 0.0039                    | 0.0081                         | 1.443              | 0.3626                 | 0.7477                      | 0.390                   |
| 2015     | 0.0222                | 0.0050                    | 0.0098                         | 1.299              | 0.2926                 | 0.5753                      | 0.415                   |

2759-001  
 A Single Dose Toxicity Study of Test Article Administered by Intrathecal Injection in Rats

Individual Organ Weight Values  
 Day 29

Sex: Male Day: 29 Relative to Start Date

| Low Dose | Sal gl mand/<br>sub., rt/BWt<br>(%) | Sal gl mand/<br>sub.,rt/BrWt<br>(ratio) | Spleen<br>(g) | Spleen/BWt<br>(%) | Spleen/BrWt<br>(ratio) | Testes<br>(g) | Testes/BWt<br>(%) |
|----------|-------------------------------------|-----------------------------------------|---------------|-------------------|------------------------|---------------|-------------------|
|          | 2011                                | 0.0716                                  | 0.1573        | 0.710             | 0.1655                 | 0.3637        | 3.783             |
| 2012     | 0.0778                              | 0.1653                                  | 0.689         | 0.1591            | 0.3379                 | 3.546         | 0.8189            |
| 2013     | 0.0904                              | 0.1844                                  | 0.835         | 0.1906            | 0.3889                 | 3.822         | 0.8726            |
| 2014     | 0.0980                              | 0.2021                                  | 1.041         | 0.2616            | 0.5394                 | 3.178         | 0.7985            |
| 2015     | 0.0935                              | 0.1838                                  | 0.763         | 0.1718            | 0.3379                 | 3.442         | 0.7752            |



2759-001  
 A Single Dose Toxicity Study of Test Article Administered by Intrathecal Injection in Rats

Individual Organ Weight Values  
 Day 29

Sex: Male Day: 29 Relative to Start Date

| Low Dose | Testes/BrWt | Thymus | Thymus/BWt | Thymus/BrWt | Thyroid/para<br>(fixed) | Thyroid/para<br>(fixed)/BWt | Thyroid/para<br>(fixed)/BrWt |
|----------|-------------|--------|------------|-------------|-------------------------|-----------------------------|------------------------------|
|          | (ratio)     | (g)    | (%)        | (ratio)     | (g)                     | (%)                         | (ratio)                      |
| 2011     | 1.9380      | 0.386  | 0.0900     | 0.1977      | 0.0275                  | 0.0064                      | 0.0141                       |
| 2012     | 1.7391      | 0.641  | 0.1480     | 0.3144      | 0.0317                  | 0.0073                      | 0.0155                       |
| 2013     | 1.7802      | 0.480  | 0.1096     | 0.2236      | 0.0292                  | 0.0067                      | 0.0136                       |
| 2014     | 1.6466      | 0.563  | 0.1415     | 0.2917      | 0.0297                  | 0.0075                      | 0.0154                       |
| 2015     | 1.5244      | 0.457  | 0.1029     | 0.2024      | 0.0348                  | 0.0078                      | 0.0154                       |



2759-001  
A Single Dose Toxicity Study of Test Article Administered by Intrathecal Injection in Rats

Individual Organ Weight Values  
Day 29

Sex: Male Day: 29 Relative to Start Date

| Mid Dose | Body Weight (g) | Brain (g) | Brain/BWt (%) | Adrenal glands (g) | Adrenal gl/ BWt (%) | Adrenal gl/ BrWt (ratio) | Epididymides (g) |
|----------|-----------------|-----------|---------------|--------------------|---------------------|--------------------------|------------------|
| 3011     | 396             | 2.102     | 0.5308        | 0.086              | 0.0217              | 0.0409                   | 1.335            |
| 3012     | 372             | 2.086     | 0.5608        | 0.066              | 0.0177              | 0.0316                   | 1.212            |
| 3013     | 470             | 1.996     | 0.4247        | 0.063              | 0.0134              | 0.0316                   | 1.337            |
| 3014     | 458             | 2.105     | 0.4596        | 0.063              | 0.0138              | 0.0299                   | 1.231            |
| 3015     | 368             | 1.978     | 0.5375        | 0.061              | 0.0166              | 0.0308                   | 1.183            |

2759-001  
A Single Dose Toxicity Study of Test Article Administered by Intrathecal Injection in Rats

Individual Organ Weight Values  
Day 29

Sex: Male Day: 29 Relative to Start Date

| Mid Dose | Epididymides /BWt (%) | Epididymides /BrWt (ratio) | Heart (g) | Heart/BWt (%) | Heart/BrWt (ratio) | Kidneys (g) | Kidneys/BWt (%) |
|----------|-----------------------|----------------------------|-----------|---------------|--------------------|-------------|-----------------|
| 3011     | 0.3371                | 0.6351                     | 1.592     | 0.4020        | 0.7574             | 3.321       | 0.8386          |
| 3012     | 0.3258                | 0.5810                     | 1.380     | 0.3710        | 0.6616             | 2.981       | 0.8013          |
| 3013     | 0.2845                | 0.6698                     | 1.857     | 0.3951        | 0.9304             | 4.372       | 0.9302          |
| 3014     | 0.2688                | 0.5848                     | 1.486     | 0.3245        | 0.7059             | 3.481       | 0.7600          |
| 3015     | 0.3215                | 0.5981                     | 1.316     | 0.3576        | 0.6653             | 3.124       | 0.8489          |

2759-001  
 A Single Dose Toxicity Study of Test Article Administered by Intrathecal Injection in Rats

Individual Organ Weight Values  
 Day 29

Sex: Male Day: 29 Relative to Start Date

| Mid Dose | Kidneys/BrWt | Liver  | Liver/BWt | Liver/BrWt | Lung  | Lung/BWt | Lung/BrWt |
|----------|--------------|--------|-----------|------------|-------|----------|-----------|
|          | (ratio)      | (g)    | (%)       | (ratio)    | (g)   | (%)      | (ratio)   |
| 3011     | 1.5799       | 13.614 | 3.4379    | 6.4767     | 1.671 | 0.4220   | 0.7950    |
| 3012     | 1.4291       | 13.438 | 3.6124    | 6.4420     | 1.639 | 0.4406   | 0.7857    |
| 3013     | 2.1904       | 17.830 | 3.7936    | 8.9329     | 2.157 | 0.4589   | 1.0807    |
| 3014     | 1.6537       | 15.140 | 3.3057    | 7.1924     | 2.402 | 0.5245   | 1.1411    |
| 3015     | 1.5794       | 12.968 | 3.5239    | 6.5561     | 1.533 | 0.4166   | 0.7750    |

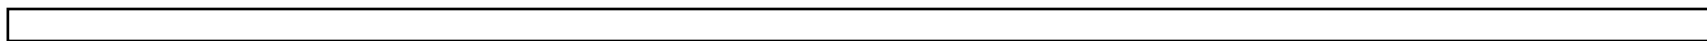

2759-001  
A Single Dose Toxicity Study of Test Article Administered by Intrathecal Injection in Rats

Individual Organ Weight Values  
Day 29

Sex: Male Day: 29 Relative to Start Date

| Mid Dose | Pituitary<br>(fixed)<br>(g) | Pituitary<br>(fixed)/BWt<br>(%) | Pituitary<br>(fixed)/BrWt<br>(ratio) | Prostate<br>gland<br>(g) | Prostate<br>gland/BWt<br>(%) | Prostate<br>gland/BrWt<br>(ratio) | Sal, mand/<br>sub., rt<br>(g) |
|----------|-----------------------------|---------------------------------|--------------------------------------|--------------------------|------------------------------|-----------------------------------|-------------------------------|
| 3011     | 0.0142                      | 0.0036                          | 0.0068                               | 1.382                    | 0.3490                       | 0.6575                            | 0.318                         |
| 3012     | 0.0167                      | 0.0045                          | 0.0080                               | 0.904                    | 0.2430                       | 0.4334                            | 0.322                         |
| 3013     | 0.0202                      | 0.0043                          | 0.0101                               | 1.403                    | 0.2985                       | 0.7029                            | 0.387                         |
| 3014     | 0.0166                      | 0.0036                          | 0.0079                               | 1.247                    | 0.2723                       | 0.5924                            | 0.328                         |
| 3015     | 0.0147                      | 0.0040                          | 0.0074                               | 1.552                    | 0.4217                       | 0.7846                            | 0.323                         |

2759-001  
 A Single Dose Toxicity Study of Test Article Administered by Intrathecal Injection in Rats

Individual Organ Weight Values  
 Day 29

Sex: Male Day: 29 Relative to Start Date

| Mid Dose | Sal gl mand/<br>sub., rt/BWt<br>(%) | Sal gl mand/<br>sub.,rt/BrWt<br>(ratio) | Spleen<br>(g) | Spleen/BWt<br>(%) | Spleen/BrWt<br>(ratio) | Testes<br>(g) | Testes/BWt<br>(%) |
|----------|-------------------------------------|-----------------------------------------|---------------|-------------------|------------------------|---------------|-------------------|
|          | 3011                                | 0.0803                                  | 0.1513        | 0.908             | 0.2293                 | 0.4320        | 3.983             |
| 3012     | 0.0866                              | 0.1544                                  | 1.045         | 0.2809            | 0.5010                 | 3.310         | 0.8898            |
| 3013     | 0.0823                              | 0.1939                                  | 1.527         | 0.3249            | 0.7650                 | 3.855         | 0.8202            |
| 3014     | 0.0716                              | 0.1558                                  | 0.893         | 0.1950            | 0.4242                 | 3.522         | 0.7690            |
| 3015     | 0.0878                              | 0.1633                                  | 0.892         | 0.2424            | 0.4510                 | 3.754         | 1.0201            |

2759-001  
 A Single Dose Toxicity Study of Test Article Administered by Intrathecal Injection in Rats

Individual Organ Weight Values  
 Day 29

Sex: Male Day: 29 Relative to Start Date

| Mid Dose | Testes/BrWt | Thymus | Thymus/BWt | Thymus/BrWt | Thyroid/para<br>(fixed) | Thyroid/para<br>(fixed)/BWt | Thyroid/para<br>(fixed)/BrWt |
|----------|-------------|--------|------------|-------------|-------------------------|-----------------------------|------------------------------|
|          | (ratio)     | (g)    | (%)        | (ratio)     | (g)                     | (%)                         | (ratio)                      |
| 3011     | 1.8949      | 0.426  | 0.1076     | 0.2027      | 0.0298                  | 0.0075                      | 0.0142                       |
| 3012     | 1.5868      | 0.488  | 0.1312     | 0.2339      | 0.0283                  | 0.0076                      | 0.0136                       |
| 3013     | 1.9314      | 0.656  | 0.1396     | 0.3287      | 0.0292                  | 0.0062                      | 0.0146                       |
| 3014     | 1.6732      | 0.910  | 0.1987     | 0.4323      | 0.0262                  | 0.0057                      | 0.0124                       |
| 3015     | 1.8979      | 0.510  | 0.1386     | 0.2578      | 0.0208                  | 0.0057                      | 0.0105                       |



2759-001  
A Single Dose Toxicity Study of Test Article Administered by Intrathecal Injection in Rats

Individual Organ Weight Values  
Day 29

Sex: Male Day: 29 Relative to Start Date

| High Dose | Body Weight (g) | Brain (g) | Brain/BWt (%) | Adrenal glands (g) | Adrenal gl/ BWt (%) | Adrenal gl/ BrWt (ratio) | Epididymides (g) |
|-----------|-----------------|-----------|---------------|--------------------|---------------------|--------------------------|------------------|
| 4011      | 429             | 2.113     | 0.4925        | 0.083              | 0.0193              | 0.0393                   | 1.291            |
| 4012      | 558             | 2.153     | 0.3858        | 0.100              | 0.0179              | 0.0464                   | 1.423            |
| 4013      | 405             | 2.052     | 0.5067        | 0.062              | 0.0153              | 0.0302                   | 1.168            |
| 4014      | 406             | 2.057     | 0.5067        | 0.073              | 0.0180              | 0.0355                   | 1.287            |
| 4015      | 355             | 2.157     | 0.6076        | 0.065              | 0.0183              | 0.0301                   | 1.323            |



2759-001  
 A Single Dose Toxicity Study of Test Article Administered by Intrathecal Injection in Rats

Individual Organ Weight Values  
 Day 29

Sex: Male Day: 29 Relative to Start Date

| High Dose | Epididymides | Epididymides  | Heart | Heart/BWt | Heart/BrWt | Kidneys | Kidneys/BWt |
|-----------|--------------|---------------|-------|-----------|------------|---------|-------------|
|           | /BWt (%)     | /BrWt (ratio) | (g)   | (%)       | (ratio)    | (g)     | (%)         |
| 4011      | 0.3009       | 0.6110        | 2.023 | 0.4716    | 0.9574     | 3.606   | 0.8406      |
| 4012      | 0.2550       | 0.6609        | 2.302 | 0.4125    | 1.0692     | 4.201   | 0.7529      |
| 4013      | 0.2884       | 0.5692        | 1.592 | 0.3931    | 0.7758     | 3.243   | 0.8007      |
| 4014      | 0.3170       | 0.6257        | 1.602 | 0.3946    | 0.7788     | 3.917   | 0.9648      |
| 4015      | 0.3727       | 0.6134        | 1.831 | 0.5158    | 0.8489     | 3.354   | 0.9448      |

2759-001  
 A Single Dose Toxicity Study of Test Article Administered by Intrathecal Injection in Rats

Individual Organ Weight Values  
 Day 29

Sex: Male Day: 29 Relative to Start Date

| High Dose | Kidneys/BrWt | Liver  | Liver/BWt | Liver/BrWt | Lung  | Lung/BWt | Lung/BrWt |
|-----------|--------------|--------|-----------|------------|-------|----------|-----------|
|           | (ratio)      | (g)    | (%)       | (ratio)    | (g)   | (%)      | (ratio)   |
| 4011      | 1.7066       | 14.669 | 3.4193    | 6.9423     | 2.035 | 0.4744   | 0.9631    |
| 4012      | 1.9512       | 21.576 | 3.8667    | 10.0214    | 2.183 | 0.3912   | 1.0139    |
| 4013      | 1.5804       | 14.210 | 3.5086    | 6.9250     | 2.226 | 0.5496   | 1.0848    |
| 4014      | 1.9042       | 14.939 | 3.6796    | 7.2625     | 1.610 | 0.3966   | 0.7827    |
| 4015      | 1.5549       | 12.439 | 3.5039    | 5.7668     | 2.555 | 0.7197   | 1.1845    |



2759-001  
 A Single Dose Toxicity Study of Test Article Administered by Intrathecal Injection in Rats

Individual Organ Weight Values  
 Day 29

Sex: Male Day: 29 Relative to Start Date

| High Dose | Pituitary (fixed) (g) | Pituitary (fixed)/BWt (%) | Pituitary (fixed)/BrWt (ratio) | Prostate gland (g) | Prostate gland/BWt (%) | Prostate gland/BrWt (ratio) | Sal, mand/ sub., rt (g) |
|-----------|-----------------------|---------------------------|--------------------------------|--------------------|------------------------|-----------------------------|-------------------------|
| 4011      | 0.0177                | 0.0041                    | 0.0084                         | 1.410              | 0.3287                 | 0.6673                      | 0.425                   |
| 4012      | 0.0152                | 0.0027                    | 0.0071                         | 1.237              | 0.2217                 | 0.5745                      | 0.342                   |
| 4013      | 0.0150                | 0.0037                    | 0.0073                         | 1.144              | 0.2825                 | 0.5575                      | 0.315                   |
| 4014      | 0.0175                | 0.0043                    | 0.0085                         | 1.260              | 0.3103                 | 0.6125                      | 0.372                   |
| 4015      | 0.0136                | 0.0038                    | 0.0063                         | 1.234              | 0.3476                 | 0.5721                      | 0.324                   |

2759-001  
 A Single Dose Toxicity Study of Test Article Administered by Intrathecal Injection in Rats

Individual Organ Weight Values  
 Day 29

Sex: Male Day: 29 Relative to Start Date

| High Dose | Sal gl mand/<br>sub., rt/BWt<br>(%) | Sal gl mand/<br>sub.,rt/BrWt<br>(ratio) | Spleen<br>(g) | Spleen/BWt<br>(%) | Spleen/BrWt<br>(ratio) | Testes<br>(g) | Testes/BWt<br>(%) |
|-----------|-------------------------------------|-----------------------------------------|---------------|-------------------|------------------------|---------------|-------------------|
|           | 4011                                | 0.0991                                  | 0.2011        | 0.872             | 0.2033                 | 0.4127        | 3.547             |
| 4012      | 0.0613                              | 0.1588                                  | 1.092         | 0.1957            | 0.5072                 | 3.914         | 0.7014            |
| 4013      | 0.0778                              | 0.1535                                  | 0.754         | 0.1862            | 0.3674                 | 3.712         | 0.9165            |
| 4014      | 0.0916                              | 0.1808                                  | 0.972         | 0.2394            | 0.4725                 | 3.873         | 0.9539            |
| 4015      | 0.0913                              | 0.1502                                  | 0.842         | 0.2372            | 0.3904                 | 3.405         | 0.9592            |

2759-001  
A Single Dose Toxicity Study of Test Article Administered by Intrathecal Injection in Rats

Individual Organ Weight Values  
Day 29

Sex: Male Day: 29 Relative to Start Date

| High Dose | Testes/BrWt | Thymus | Thymus/BWt | Thymus/BrWt | Thyroid/para<br>(fixed) | Thyroid/para<br>(fixed)/BWt | Thyroid/para<br>(fixed)/BrWt |
|-----------|-------------|--------|------------|-------------|-------------------------|-----------------------------|------------------------------|
|           | (ratio)     | (g)    | (%)        | (ratio)     | (g)                     | (%)                         | (ratio)                      |
| 4011      | 1.6787      | 0.445  | 0.1037     | 0.2106      | 0.0267                  | 0.0062                      | 0.0126                       |
| 4012      | 1.8179      | 0.676  | 0.1211     | 0.3140      | 0.0321                  | 0.0058                      | 0.0149                       |
| 4013      | 1.8090      | 0.534  | 0.1319     | 0.2602      | 0.0260                  | 0.0064                      | 0.0127                       |
| 4014      | 1.8828      | 0.641  | 0.1579     | 0.3116      | 0.0276                  | 0.0068                      | 0.0134                       |
| 4015      | 1.5786      | 0.593  | 0.1670     | 0.2749      | 0.0222                  | 0.0063                      | 0.0103                       |

2759-001  
A Single Dose Toxicity Study of Test Article Administered by Intrathecal Injection in Rats

Individual Organ Weight Values  
Day 29

Sex: Female Day: 29 Relative to Start Date

| Vehicle | Body Weight (g) | Brain (g) | Brain/BWt (%) | Adrenal glands (g) | Adrenal gl/ BWt (%) | Adrenal gl/ BrWt (ratio) | Heart (g) |
|---------|-----------------|-----------|---------------|--------------------|---------------------|--------------------------|-----------|
| 1511    | 251             | 2.132     | 0.8494        | 0.060              | 0.0239              | 0.0281                   | 0.874     |
| 1512    | 251             | 1.921     | 0.7653        | 0.090              | 0.0359              | 0.0469                   | 0.812     |
| 1513    | 220             | 1.914     | 0.8700        | 0.076              | 0.0345              | 0.0397                   | 0.921     |
| 1514    | 251             | 1.972     | 0.7857        | 0.066              | 0.0263              | 0.0335                   | 0.860     |
| 1515    | 222             | 1.908     | 0.8595        | 0.080              | 0.0360              | 0.0419                   | 1.081     |

2759-001  
 A Single Dose Toxicity Study of Test Article Administered by Intrathecal Injection in Rats

Individual Organ Weight Values  
 Day 29

Sex: Female Day: 29 Relative to Start Date

| Vehicle | Heart/BWt | Heart/BrWt | Kidneys | Kidneys/BWt | Kidneys/BrWt | Liver | Liver/BWt |
|---------|-----------|------------|---------|-------------|--------------|-------|-----------|
|         | (%)       | (ratio)    | (g)     | (%)         | (ratio)      | (g)   | (%)       |
| 1511    | 0.3482    | 0.4099     | 1.919   | 0.7645      | 0.9001       | 9.071 | 3.6139    |
| 1512    | 0.3235    | 0.4227     | 1.956   | 0.7793      | 1.0182       | 8.577 | 3.4171    |
| 1513    | 0.4186    | 0.4812     | 1.874   | 0.8518      | 0.9791       | 8.817 | 4.0077    |
| 1514    | 0.3426    | 0.4361     | 1.785   | 0.7112      | 0.9052       | 8.057 | 3.2100    |
| 1515    | 0.4869    | 0.5666     | 1.641   | 0.7392      | 0.8601       | 7.822 | 3.5234    |

2759-001  
 A Single Dose Toxicity Study of Test Article Administered by Intrathecal Injection in Rats

Individual Organ Weight Values  
 Day 29

Sex: Female Day: 29 Relative to Start Date

| Vehicle | Liver/BrWt | Lung  | Lung/BWt | Lung/BrWt | Ovaries | Ovaries/BWt | Ovaries/BrWt |
|---------|------------|-------|----------|-----------|---------|-------------|--------------|
|         | (ratio)    | (g)   | (%)      | (ratio)   | (g)     | (%)         | (ratio)      |
| 1511    | 4.2547     | 1.973 | 0.7861   | 0.9254    | 0.082   | 0.0327      | 0.0385       |
| 1512    | 4.4649     | 1.726 | 0.6876   | 0.8985    | 0.055   | 0.0219      | 0.0286       |
| 1513    | 4.6066     | 1.166 | 0.5300   | 0.6092    | 0.101   | 0.0459      | 0.0528       |
| 1514    | 4.0857     | 1.194 | 0.4757   | 0.6055    | 0.089   | 0.0355      | 0.0451       |
| 1515    | 4.0996     | 1.361 | 0.6131   | 0.7133    | 0.095   | 0.0428      | 0.0498       |



2759-001  
 A Single Dose Toxicity Study of Test Article Administered by Intrathecal Injection in Rats

Individual Organ Weight Values  
 Day 29

Sex: Female Day: 29 Relative to Start Date

| Vehicle | Oviducts<br>(g) | Oviducts/BWt<br>(%) | Oviducts/<br>BrWt<br>(ratio) | Pituitary<br>(fixed)<br>(g) | Pituitary<br>(fixed)/BWt<br>(%) | Pituitary<br>(fixed)/BrWt<br>(ratio) | Sal, mand/<br>sub., rt<br>(g) |
|---------|-----------------|---------------------|------------------------------|-----------------------------|---------------------------------|--------------------------------------|-------------------------------|
| 1511    | 0.022           | 0.0088              | 0.0103                       | 0.0175                      | 0.0070                          | 0.0082                               | 0.237                         |
| 1512    | 0.022           | 0.0088              | 0.0115                       | 0.0153                      | 0.0061                          | 0.0080                               | 0.308                         |
| 1513    | 0.017           | 0.0077              | 0.0089                       | 0.0206                      | 0.0094                          | 0.0108                               | 0.228                         |
| 1514    | 0.019           | 0.0076              | 0.0096                       | 0.0185                      | 0.0074                          | 0.0094                               | 0.179                         |
| 1515    | 0.049           | 0.0221              | 0.0257                       | 0.0195                      | 0.0088                          | 0.0102                               | 0.187                         |

2759-001  
A Single Dose Toxicity Study of Test Article Administered by Intrathecal Injection in Rats

Individual Organ Weight Values  
Day 29

Sex: Female Day: 29 Relative to Start Date

| Vehicle | Sal gl mand/<br>sub., rt/BWt<br>(%) | Sal gl mand/<br>sub.,rt/BrWt<br>(ratio) | Spleen<br>(g) | Spleen/BWt<br>(%) | Spleen/BrWt<br>(ratio) | Thymus<br>(g) | Thymus/BWt<br>(%) |
|---------|-------------------------------------|-----------------------------------------|---------------|-------------------|------------------------|---------------|-------------------|
| 1511    | 0.0944                              | 0.1112                                  | 0.507         | 0.2020            | 0.2378                 | 0.478         | 0.1904            |
| 1512    | 0.1227                              | 0.1603                                  | 0.627         | 0.2498            | 0.3264                 | 0.523         | 0.2084            |
| 1513    | 0.1036                              | 0.1191                                  | 0.576         | 0.2618            | 0.3009                 | 0.302         | 0.1373            |
| 1514    | 0.0713                              | 0.0908                                  | 0.431         | 0.1717            | 0.2186                 | 0.495         | 0.1972            |
| 1515    | 0.0842                              | 0.0980                                  | 0.542         | 0.2441            | 0.2841                 | 0.458         | 0.2063            |

2759-001  
 A Single Dose Toxicity Study of Test Article Administered by Intrathecal Injection in Rats

Individual Organ Weight Values  
 Day 29

Sex: Female Day: 29 Relative to Start Date

| Vehicle | Thymus/BrWt<br>(ratio) | Thyroid/para<br>(fixed)<br>(g) | Thyroid/para<br>(fixed)/BWt<br>(%) | Thyroid/para<br>(fixed)/BrWt<br>(ratio) | Uterus w/<br>cervix<br>(g) | Uterus w/<br>cervix/BWt<br>(%) | Uterus w/<br>cervix/BrWt<br>(ratio) |
|---------|------------------------|--------------------------------|------------------------------------|-----------------------------------------|----------------------------|--------------------------------|-------------------------------------|
| 1511    | 0.2242                 | 0.0245                         | 0.0098                             | 0.0115                                  | 0.503                      | 0.2004                         | 0.2359                              |
| 1512    | 0.2723                 | 0.0238                         | 0.0095                             | 0.0124                                  | 0.622                      | 0.2478                         | 0.3238                              |
| 1513    | 0.1578                 | 0.0195                         | 0.0089                             | 0.0102                                  | 0.488                      | 0.2218                         | 0.2550                              |
| 1514    | 0.2510                 | 0.0174                         | 0.0069                             | 0.0088                                  | 0.434                      | 0.1729                         | 0.2201                              |
| 1515    | 0.2400                 | 0.0163                         | 0.0073                             | 0.0085                                  | 0.660                      | 0.2973                         | 0.3459                              |

2759-001  
A Single Dose Toxicity Study of Test Article Administered by Intrathecal Injection in Rats

Individual Organ Weight Values  
Day 29

Sex: Female Day: 29 Relative to Start Date

| Low Dose | Body Weight (g) | Brain (g) | Brain/BWt (%) | Adrenal glands (g) | Adrenal gl/ BWt (%) | Adrenal gl/ BrWt (ratio) | Heart (g) |
|----------|-----------------|-----------|---------------|--------------------|---------------------|--------------------------|-----------|
| 2511     | 212             | 1.910     | 0.9009        | 0.062              | 0.0292              | 0.0325                   | 0.879     |
| 2512     | 241             | 1.975     | 0.8195        | 0.058              | 0.0241              | 0.0294                   | 0.826     |
| 2513     | 195             | 1.832     | 0.9395        | 0.066              | 0.0338              | 0.0360                   | 0.780     |
| 2514     | 219             | 1.847     | 0.8434        | 0.071              | 0.0324              | 0.0384                   | 0.962     |
| 2515     | 210             | 1.807     | 0.8605        | 0.093              | 0.0443              | 0.0515                   | 0.777     |

2759-001  
 A Single Dose Toxicity Study of Test Article Administered by Intrathecal Injection in Rats

Individual Organ Weight Values  
 Day 29

Sex: Female Day: 29 Relative to Start Date

| Low Dose | Heart/BWt | Heart/BrWt | Kidneys | Kidneys/BWt | Kidneys/BrWt | Liver | Liver/BWt |
|----------|-----------|------------|---------|-------------|--------------|-------|-----------|
|          | (%)       | (ratio)    | (g)     | (%)         | (ratio)      | (g)   | (%)       |
| 2511     | 0.4146    | 0.4602     | 1.825   | 0.8608      | 0.9555       | 8.738 | 4.1217    |
| 2512     | 0.3427    | 0.4182     | 1.996   | 0.8282      | 1.0106       | 8.629 | 3.5805    |
| 2513     | 0.4000    | 0.4258     | 1.622   | 0.8318      | 0.8854       | 7.251 | 3.7185    |
| 2514     | 0.4393    | 0.5208     | 1.853   | 0.8461      | 1.0032       | 8.105 | 3.7009    |
| 2515     | 0.3700    | 0.4300     | 2.017   | 0.9605      | 1.1162       | 9.107 | 4.3367    |

2759-001  
 A Single Dose Toxicity Study of Test Article Administered by Intrathecal Injection in Rats

Individual Organ Weight Values  
 Day 29

Sex: Female Day: 29 Relative to Start Date

| Low Dose | Liver/BrWt | Lung  | Lung/BWt | Lung/BrWt | Ovaries | Ovaries/BWt | Ovaries/BrWt |
|----------|------------|-------|----------|-----------|---------|-------------|--------------|
|          | (ratio)    | (g)   | (%)      | (ratio)   | (g)     | (%)         | (ratio)      |
| 2511     | 4.5749     | 1.172 | 0.5528   | 0.6136    | 0.077   | 0.0363      | 0.0403       |
| 2512     | 4.3691     | 1.423 | 0.5905   | 0.7205    | 0.055   | 0.0228      | 0.0278       |
| 2513     | 3.9580     | 1.145 | 0.5872   | 0.6250    | 0.077   | 0.0395      | 0.0420       |
| 2514     | 4.3882     | 1.238 | 0.5653   | 0.6703    | 0.098   | 0.0447      | 0.0531       |
| 2515     | 5.0398     | 1.228 | 0.5848   | 0.6796    | 0.088   | 0.0419      | 0.0487       |

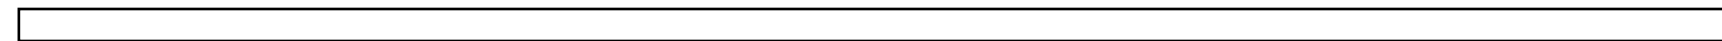

2759-001  
A Single Dose Toxicity Study of Test Article Administered by Intrathecal Injection in Rats

Individual Organ Weight Values  
Day 29

Sex: Female Day: 29 Relative to Start Date

| Low Dose | Oviducts | Oviducts/BWt | Oviducts/<br>BrWt | Pituitary<br>(fixed) | Pituitary<br>(fixed)/BWt | Pituitary<br>(fixed)/BrWt | Sal, mand/<br>sub., rt |
|----------|----------|--------------|-------------------|----------------------|--------------------------|---------------------------|------------------------|
|          | (g)      | (%)          | (ratio)           | (g)                  | (%)                      | (ratio)                   | (g)                    |
| 2511     | 0.025    | 0.0118       | 0.0131            | 0.0219               | 0.0103                   | 0.0115                    | 0.187                  |
| 2512     | 0.021    | 0.0087       | 0.0106            | 0.0184               | 0.0076                   | 0.0093                    | 0.169                  |
| 2513     | 0.029    | 0.0149       | 0.0158            | 0.0189               | 0.0097                   | 0.0103                    | 0.200                  |
| 2514     | 0.032    | 0.0146       | 0.0173            | 0.0212               | 0.0097                   | 0.0115                    | 0.213                  |
| 2515     | 0.031    | 0.0148       | 0.0172            | 0.0195               | 0.0093                   | 0.0108                    | 0.251                  |

2759-001  
A Single Dose Toxicity Study of Test Article Administered by Intrathecal Injection in Rats

Individual Organ Weight Values  
Day 29

Sex: Female Day: 29 Relative to Start Date

| Low Dose | Sal gl mand/<br>sub., rt/BWt<br>(%) | Sal gl mand/<br>sub.,rt/BrWt<br>(ratio) | Spleen<br>(g) | Spleen/BWt<br>(%) | Spleen/BrWt<br>(ratio) | Thymus<br>(g) | Thymus/BWt<br>(%) |
|----------|-------------------------------------|-----------------------------------------|---------------|-------------------|------------------------|---------------|-------------------|
|          | 2511                                | 0.0882                                  | 0.0979        | 0.479             | 0.2259                 | 0.2508        | 0.277             |
| 2512     | 0.0701                              | 0.0856                                  | 0.467         | 0.1938            | 0.2365                 | 0.404         | 0.1676            |
| 2513     | 0.1026                              | 0.1092                                  | 0.464         | 0.2379            | 0.2533                 | 0.423         | 0.2169            |
| 2514     | 0.0973                              | 0.1153                                  | 0.575         | 0.2626            | 0.3113                 | 0.441         | 0.2014            |
| 2515     | 0.1195                              | 0.1389                                  | 0.544         | 0.2590            | 0.3011                 | 0.298         | 0.1419            |



2759-001  
 A Single Dose Toxicity Study of Test Article Administered by Intrathecal Injection in Rats

Individual Organ Weight Values  
 Day 29

Sex: Female Day: 29 Relative to Start Date

| Low Dose | Thymus/BrWt<br>(ratio) | Thyroid/para<br>(fixed)<br>(g) | Thyroid/para<br>(fixed)/BWt<br>(%) | Thyroid/para<br>(fixed)/BrWt<br>(ratio) | Uterus w/<br>cervix<br>(g) | Uterus w/<br>cervix/BWt<br>(%) | Uterus w/<br>cervix/BrWt<br>(ratio) |
|----------|------------------------|--------------------------------|------------------------------------|-----------------------------------------|----------------------------|--------------------------------|-------------------------------------|
| 2511     | 0.1450                 | 0.0208                         | 0.0098                             | 0.0109                                  | 0.430                      | 0.2028                         | 0.2251                              |
| 2512     | 0.2046                 | 0.0163                         | 0.0068                             | 0.0083                                  | 0.678                      | 0.2813                         | 0.3433                              |
| 2513     | 0.2309                 | 0.0218                         | 0.0112                             | 0.0119                                  | 0.620                      | 0.3179                         | 0.3384                              |
| 2514     | 0.2388                 | 0.0197                         | 0.0090                             | 0.0107                                  | 0.555                      | 0.2534                         | 0.3005                              |
| 2515     | 0.1649                 | 0.0232                         | 0.0110                             | 0.0128                                  | 0.571                      | 0.2719                         | 0.3160                              |

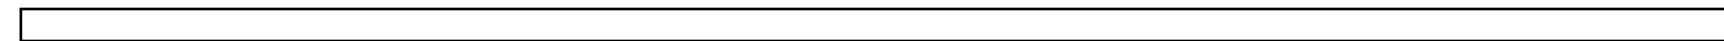

2759-001  
A Single Dose Toxicity Study of Test Article Administered by Intrathecal Injection in Rats

Individual Organ Weight Values  
Day 29

Sex: Female Day: 29 Relative to Start Date

| Mid Dose | Body Weight (g) | Brain (g) | Brain/BWt (%) | Adrenal glands (g) | Adrenal gl/ BWt (%) | Adrenal gl/ BrWt (ratio) | Heart (g) |
|----------|-----------------|-----------|---------------|--------------------|---------------------|--------------------------|-----------|
| 3511     | 230             | 1.905     | 0.8283        | 0.055              | 0.0239              | 0.0289                   | 0.904     |
| 3512     | 189             | 1.721     | 0.9106        | 0.066              | 0.0349              | 0.0383                   | 0.766     |
| 3513     | 226             | 1.885     | 0.8341        | 0.084              | 0.0372              | 0.0446                   | 0.969     |
| 3514     | 196             | 1.807     | 0.9219        | 0.066              | 0.0337              | 0.0365                   | 0.806     |
| 3515     | 244             | 2.045     | 0.8381        | 0.067              | 0.0275              | 0.0328                   | 1.015     |

2759-001  
 A Single Dose Toxicity Study of Test Article Administered by Intrathecal Injection in Rats

Individual Organ Weight Values  
 Day 29

Sex: Female Day: 29 Relative to Start Date

| Mid Dose | Heart/BWt | Heart/BrWt | Kidneys | Kidneys/BWt | Kidneys/BrWt | Liver | Liver/BWt |
|----------|-----------|------------|---------|-------------|--------------|-------|-----------|
|          | (%)       | (ratio)    | (g)     | (%)         | (ratio)      | (g)   | (%)       |
| 3511     | 0.3930    | 0.4745     | 1.985   | 0.8630      | 1.0420       | 8.192 | 3.5617    |
| 3512     | 0.4053    | 0.4451     | 1.534   | 0.8116      | 0.8913       | 7.299 | 3.8619    |
| 3513     | 0.4288    | 0.5141     | 1.983   | 0.8774      | 1.0520       | 9.872 | 4.3681    |
| 3514     | 0.4112    | 0.4460     | 1.489   | 0.7597      | 0.8240       | 7.095 | 3.6199    |
| 3515     | 0.4160    | 0.4963     | 2.055   | 0.8422      | 1.0049       | 9.364 | 3.8377    |

2759-001  
 A Single Dose Toxicity Study of Test Article Administered by Intrathecal Injection in Rats

Individual Organ Weight Values  
 Day 29

Sex: Female Day: 29 Relative to Start Date

| Mid Dose | Liver/BrWt | Lung  | Lung/BWt | Lung/BrWt | Ovaries | Ovaries/BWt | Ovaries/BrWt |
|----------|------------|-------|----------|-----------|---------|-------------|--------------|
|          | (ratio)    | (g)   | (%)      | (ratio)   | (g)     | (%)         | (ratio)      |
| 3511     | 4.3003     | 1.201 | 0.5222   | 0.6304    | 0.086   | 0.0374      | 0.0451       |
| 3512     | 4.2411     | 1.346 | 0.7122   | 0.7821    | 0.063   | 0.0333      | 0.0366       |
| 3513     | 5.2371     | 1.074 | 0.4752   | 0.5698    | 0.049   | 0.0217      | 0.0260       |
| 3514     | 3.9264     | 0.974 | 0.4969   | 0.5390    | 0.050   | 0.0255      | 0.0277       |
| 3515     | 4.5790     | 1.461 | 0.5988   | 0.7144    | 0.098   | 0.0402      | 0.0479       |

2759-001  
 A Single Dose Toxicity Study of Test Article Administered by Intrathecal Injection in Rats

Individual Organ Weight Values  
 Day 29

Sex: Female Day: 29 Relative to Start Date

| Mid Dose | Oviducts | Oviducts/BWt | Oviducts/<br>BrWt | Pituitary<br>(fixed) | Pituitary<br>(fixed)/BWt | Pituitary<br>(fixed)/BrWt | Sal, mand/<br>sub., rt |
|----------|----------|--------------|-------------------|----------------------|--------------------------|---------------------------|------------------------|
|          | (g)      | (%)          | (ratio)           | (g)                  | (%)                      | (ratio)                   | (g)                    |
| 3511     | 0.022    | 0.0096       | 0.0115            | 0.0142               | 0.0062                   | 0.0075                    | 0.186                  |
| 3512     | 0.030    | 0.0159       | 0.0174            | 0.0125               | 0.0066                   | 0.0073                    | 0.173                  |
| 3513     | 0.033    | 0.0146       | 0.0175            | 0.0167               | 0.0074                   | 0.0089                    | 0.247                  |
| 3514     | 0.022    | 0.0112       | 0.0122            | 0.0223               | 0.0114                   | 0.0123                    | 0.155                  |
| 3515     | 0.030    | 0.0123       | 0.0147            | 0.0161               | 0.0066                   | 0.0079                    | 0.103                  |

2759-001  
 A Single Dose Toxicity Study of Test Article Administered by Intrathecal Injection in Rats

Individual Organ Weight Values  
 Day 29

Sex: Female Day: 29 Relative to Start Date

| Mid Dose | Sal gl mand/<br>sub., rt/BWt<br>(%) | Sal gl mand/<br>sub.,rt/BrWt<br>(ratio) | Spleen<br>(g) | Spleen/BWt<br>(%) | Spleen/BrWt<br>(ratio) | Thymus<br>(g) | Thymus/BWt<br>(%) |
|----------|-------------------------------------|-----------------------------------------|---------------|-------------------|------------------------|---------------|-------------------|
|          | 3511                                | 0.0809                                  | 0.0976        | 0.776             | 0.3374                 | 0.4073        | 0.508             |
| 3512     | 0.0915                              | 0.1005                                  | 0.424         | 0.2243            | 0.2464                 | 0.308         | 0.1630            |
| 3513     | 0.1093                              | 0.1310                                  | 0.569         | 0.2518            | 0.3019                 | 0.324         | 0.1434            |
| 3514     | 0.0791                              | 0.0858                                  | 0.385         | 0.1964            | 0.2131                 | 0.304         | 0.1551            |
| 3515     | 0.0422                              | 0.0504                                  | 0.629         | 0.2578            | 0.3076                 | 0.294         | 0.1205            |

2759-001  
 A Single Dose Toxicity Study of Test Article Administered by Intrathecal Injection in Rats

Individual Organ Weight Values  
 Day 29

Sex: Female Day: 29 Relative to Start Date

| Mid Dose | Thymus/BrWt<br>(ratio) | Thyroid/para<br>(fixed)<br>(g) | Thyroid/para<br>(fixed)/BWt<br>(%) | Thyroid/para<br>(fixed)/BrWt<br>(ratio) | Uterus w/<br>cervix<br>(g) | Uterus w/<br>cervix/BWt<br>(%) | Uterus w/<br>cervix/BrWt<br>(ratio) |
|----------|------------------------|--------------------------------|------------------------------------|-----------------------------------------|----------------------------|--------------------------------|-------------------------------------|
| 3511     | 0.2667                 | 0.0234                         | 0.0102                             | 0.0123                                  | 0.597                      | 0.2596                         | 0.3134                              |
| 3512     | 0.1790                 | 0.0208                         | 0.0110                             | 0.0121                                  | 0.817                      | 0.4323                         | 0.4747                              |
| 3513     | 0.1719                 | 0.0183                         | 0.0081                             | 0.0097                                  | 0.421                      | 0.1863                         | 0.2233                              |
| 3514     | 0.1682                 | 0.0229                         | 0.0117                             | 0.0127                                  | 0.434                      | 0.2214                         | 0.2402                              |
| 3515     | 0.1438                 | 0.0208                         | 0.0085                             | 0.0102                                  | 0.611                      | 0.2504                         | 0.2988                              |



2759-001  
 A Single Dose Toxicity Study of Test Article Administered by Intrathecal Injection in Rats

Individual Organ Weight Values  
 Day 29

Sex: Female Day: 29 Relative to Start Date

| High Dose | Body Weight (g) | Brain (g) | Brain/BWt (%) | Adrenal glands (g) | Adrenal gl/ BWt (%) | Adrenal gl/ BrWt (ratio) | Heart (g) |
|-----------|-----------------|-----------|---------------|--------------------|---------------------|--------------------------|-----------|
| 4511      | 240             | 1.999     | 0.8329        | 0.121              | 0.0504              | 0.0605                   | 1.199     |
| 4512      | 229             | 1.821     | 0.7952        | 0.103              | 0.0450              | 0.0566                   | 1.023     |
| 4513      | 204             | 1.890     | 0.9265        | 0.082              | 0.0402              | 0.0434                   | 0.959     |
| 4514      | 248             | 1.901     | 0.7665        | 0.087              | 0.0351              | 0.0458                   | 1.036     |
| 4515      | 189             | 1.917     | 1.0143        | 0.065              | 0.0344              | 0.0339                   | 0.804     |



2759-001  
A Single Dose Toxicity Study of Test Article Administered by Intrathecal Injection in Rats

Individual Organ Weight Values  
Day 29

Sex: Female Day: 29 Relative to Start Date

| High Dose | Heart/BWt | Heart/BrWt | Kidneys | Kidneys/BWt | Kidneys/BrWt | Liver  | Liver/BWt |
|-----------|-----------|------------|---------|-------------|--------------|--------|-----------|
|           | (%)       | (ratio)    | (g)     | (%)         | (ratio)      | (g)    | (%)       |
| 4511      | 0.4996    | 0.5998     | 2.124   | 0.8850      | 1.0625       | 9.428  | 3.9283    |
| 4512      | 0.4467    | 0.5618     | 2.011   | 0.8782      | 1.1043       | 9.409  | 4.1087    |
| 4513      | 0.4701    | 0.5074     | 1.691   | 0.8289      | 0.8947       | 6.505  | 3.1887    |
| 4514      | 0.4177    | 0.5450     | 2.025   | 0.8165      | 1.0652       | 10.155 | 4.0948    |
| 4515      | 0.4254    | 0.4194     | 1.678   | 0.8878      | 0.8753       | 6.943  | 3.6735    |



2759-001  
 A Single Dose Toxicity Study of Test Article Administered by Intrathecal Injection in Rats

Individual Organ Weight Values  
 Day 29

Sex: Female Day: 29 Relative to Start Date

| High Dose | Liver/BrWt | Lung  | Lung/BWt | Lung/BrWt | Ovaries | Ovaries/BWt | Ovaries/BrWt |
|-----------|------------|-------|----------|-----------|---------|-------------|--------------|
|           | (ratio)    | (g)   | (%)      | (ratio)   | (g)     | (%)         | (ratio)      |
| 4511      | 4.7164     | 1.266 | 0.5275   | 0.6333    | 0.101   | 0.0421      | 0.0505       |
| 4512      | 5.1669     | 1.206 | 0.5266   | 0.6623    | 0.042   | 0.0183      | 0.0231       |
| 4513      | 3.4418     | 1.232 | 0.6039   | 0.6519    | 0.109   | 0.0534      | 0.0577       |
| 4514      | 5.3419     | 1.291 | 0.5206   | 0.6791    | 0.137   | 0.0552      | 0.0721       |
| 4515      | 3.6218     | 1.121 | 0.5931   | 0.5848    | 0.070   | 0.0370      | 0.0365       |



2759-001  
A Single Dose Toxicity Study of Test Article Administered by Intrathecal Injection in Rats

Individual Organ Weight Values  
Day 29

Sex: Female Day: 29 Relative to Start Date

| High Dose | Oviducts | Oviducts/BWt | Oviducts/<br>BrWt | Pituitary<br>(fixed) | Pituitary<br>(fixed)/BWt | Pituitary<br>(fixed)/BrWt | Sal, mand/<br>sub., rt |
|-----------|----------|--------------|-------------------|----------------------|--------------------------|---------------------------|------------------------|
|           | (g)      | (%)          | (ratio)           | (g)                  | (%)                      | (ratio)                   | (g)                    |
| 4511      | 0.029    | 0.0121       | 0.0145            | 0.0230               | 0.0096                   | 0.0115                    | 0.227                  |
| 4512      | 0.031    | 0.0135       | 0.0170            | 0.0183               | 0.0080                   | 0.0100                    | 0.216                  |
| 4513      | 0.026    | 0.0127       | 0.0138            | 0.0146               | 0.0072                   | 0.0077                    | 0.222                  |
| 4514      | 0.036    | 0.0145       | 0.0189            | 0.0181               | 0.0073                   | 0.0095                    | 0.221                  |
| 4515      | 0.020    | 0.0106       | 0.0104            | 0.0146               | 0.0077                   | 0.0076                    | 0.075                  |

2759-001  
 A Single Dose Toxicity Study of Test Article Administered by Intrathecal Injection in Rats

Individual Organ Weight Values  
 Day 29

Sex: Female Day: 29 Relative to Start Date

| High Dose | Sal gl mand/<br>sub., rt/BWt<br>(%) | Sal gl mand/<br>sub.,rt/BrWt<br>(ratio) | Spleen<br>(g) | Spleen/BWt<br>(%) | Spleen/BrWt<br>(ratio) | Thymus<br>(g) | Thymus/BWt<br>(%) |
|-----------|-------------------------------------|-----------------------------------------|---------------|-------------------|------------------------|---------------|-------------------|
|           | 4511                                | 0.0946                                  | 0.1136        | 0.680             | 0.2833                 | 0.3402        | 0.357             |
| 4512      | 0.0943                              | 0.1186                                  | 0.545         | 0.2380            | 0.2993                 | 0.475         | 0.2074            |
| 4513      | 0.1088                              | 0.1175                                  | 0.648         | 0.3176            | 0.3429                 | 0.354         | 0.1735            |
| 4514      | 0.0891                              | 0.1163                                  | 0.742         | 0.2992            | 0.3903                 | 0.752         | 0.3032            |
| 4515      | 0.0397                              | 0.0391                                  | 0.550         | 0.2910            | 0.2869                 | 0.297         | 0.1571            |

2759-001  
A Single Dose Toxicity Study of Test Article Administered by Intrathecal Injection in Rats

Individual Organ Weight Values  
Day 29

Sex: Female Day: 29 Relative to Start Date

| High Dose | Thymus/BrWt<br>(ratio) | Thyroid/para<br>(fixed)<br>(g) | Thyroid/para<br>(fixed)/BWt<br>(%) | Thyroid/para<br>(fixed)/BrWt<br>(ratio) | Uterus w/<br>cervix<br>(g) | Uterus w/<br>cervix/BWt<br>(%) | Uterus w/<br>cervix/BrWt<br>(ratio) |
|-----------|------------------------|--------------------------------|------------------------------------|-----------------------------------------|----------------------------|--------------------------------|-------------------------------------|
| 4511      | 0.1786                 | 0.0207                         | 0.0086                             | 0.0104                                  | 0.541                      | 0.2254                         | 0.2706                              |
| 4512      | 0.2608                 | 0.0198                         | 0.0086                             | 0.0109                                  | 0.481                      | 0.2100                         | 0.2641                              |
| 4513      | 0.1873                 | 0.0186                         | 0.0091                             | 0.0098                                  | 0.480                      | 0.2353                         | 0.2540                              |
| 4514      | 0.3956                 | 0.0225                         | 0.0091                             | 0.0118                                  | 0.630                      | 0.2540                         | 0.3314                              |
| 4515      | 0.1549                 | 0.0168                         | 0.0089                             | 0.0088                                  | 0.565                      | 0.2989                         | 0.2947                              |

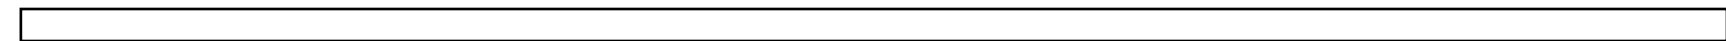

**Appendix 4**  
**Individual Organ Weight Values (Day 91)**

2759-001  
 A Single Dose Toxicity Study of Test Article Administered by Intrathecal Injection in Rats

Individual Organ Weight Values  
 Day 91

Sex: Male Day: 91 Relative to Start Date

| Vehicle | Body Weight (g) | Brain (g) | Brain/BWt (%) | Adrenal glands (g) | Adrenal gl/ BWt (%) | Adrenal gl/ BrWt (ratio) | Epididymides (g) |
|---------|-----------------|-----------|---------------|--------------------|---------------------|--------------------------|------------------|
| 1001    | 482             | 2.147     | 0.4454        | 0.074              | 0.0154              | 0.0345                   | 1.619            |
| 1002    | 534             | 1.988     | 0.3723        | 0.092              | 0.0172              | 0.0463                   | 1.798            |
| 1003    | 518             | 2.275     | 0.4392        | 0.058              | 0.0112              | 0.0255                   | 1.347            |
| 1004    | 494             | 2.318     | 0.4692        | 0.050              | 0.0101              | 0.0216                   | 1.493            |
| 1005    | 513             | 2.138     | 0.4168        | 0.068              | 0.0133              | 0.0318                   | 1.484            |

2759-001  
 A Single Dose Toxicity Study of Test Article Administered by Intrathecal Injection in Rats

Individual Organ Weight Values  
 Day 91

Sex: Male Day: 91 Relative to Start Date

| Vehicle | Epididymides /BWt (%) | Epididymides /BrWt (ratio) | Heart (g) | Heart/BWt (%) | Heart/BrWt (ratio) | Kidneys (g) | Kidneys/BWt (%) |
|---------|-----------------------|----------------------------|-----------|---------------|--------------------|-------------|-----------------|
| 1001    | 0.3359                | 0.7541                     | 1.827     | 0.3790        | 0.8510             | 3.629       | 0.7529          |
| 1002    | 0.3367                | 0.9044                     | 1.791     | 0.3354        | 0.9009             | 3.810       | 0.7135          |
| 1003    | 0.2600                | 0.5921                     | 1.671     | 0.3226        | 0.7345             | 3.962       | 0.7649          |
| 1004    | 0.3022                | 0.6441                     | 1.524     | 0.3085        | 0.6575             | 3.870       | 0.7834          |
| 1005    | 0.2893                | 0.6941                     | 1.571     | 0.3062        | 0.7348             | 3.956       | 0.7712          |



2759-001  
 A Single Dose Toxicity Study of Test Article Administered by Intrathecal Injection in Rats

Individual Organ Weight Values  
 Day 91

Sex: Male Day: 91 Relative to Start Date

| Vehicle | Kidneys/BrWt | Liver  | Liver/BWt | Liver/BrWt | Lung  | Lung/BWt | Lung/BrWt |
|---------|--------------|--------|-----------|------------|-------|----------|-----------|
|         | (ratio)      | (g)    | (%)       | (ratio)    | (g)   | (%)      | (ratio)   |
| 1001    | 1.6903       | 14.808 | 3.0722    | 6.8971     | 1.793 | 0.3720   | 0.8351    |
| 1002    | 1.9165       | 15.864 | 2.9708    | 7.9799     | 1.793 | 0.3358   | 0.9019    |
| 1003    | 1.7415       | 15.218 | 2.9378    | 6.6892     | 1.816 | 0.3506   | 0.7982    |
| 1004    | 1.6695       | 14.847 | 3.0055    | 6.4051     | 1.834 | 0.3713   | 0.7912    |
| 1005    | 1.8503       | 15.458 | 3.0133    | 7.2301     | 2.093 | 0.4080   | 0.9790    |

2759-001  
 A Single Dose Toxicity Study of Test Article Administered by Intrathecal Injection in Rats

Individual Organ Weight Values  
 Day 91

Sex: Male Day: 91 Relative to Start Date

| Vehicle | Pituitary<br>(fixed)<br>(g) | Pituitary<br>(fixed)/BWt<br>(%) | Pituitary<br>(fixed)/BrWt<br>(ratio) | Prostate<br>gland<br>(g) | Prostate<br>gland/BWt<br>(%) | Prostate<br>gland/BrWt<br>(ratio) | Sal, mand/<br>sub., rt<br>(g) |
|---------|-----------------------------|---------------------------------|--------------------------------------|--------------------------|------------------------------|-----------------------------------|-------------------------------|
| 1001    | 0.0186                      | 0.0039                          | 0.0087                               | 1.806                    | 0.3747                       | 0.8412                            | 0.379                         |
| 1002    | 0.0161                      | 0.0030                          | 0.0081                               | 1.450                    | 0.2715                       | 0.7294                            | 0.367                         |
| 1003    | 0.0186                      | 0.0036                          | 0.0082                               | 1.404                    | 0.2710                       | 0.6171                            | 0.327                         |
| 1004    | 0.0179                      | 0.0036                          | 0.0077                               | 1.947                    | 0.3941                       | 0.8399                            | 0.357                         |
| 1005    | 0.0189                      | 0.0037                          | 0.0088                               | 1.785                    | 0.3480                       | 0.8349                            | 0.353                         |

2759-001  
 A Single Dose Toxicity Study of Test Article Administered by Intrathecal Injection in Rats

Individual Organ Weight Values  
 Day 91

Sex: Male Day: 91 Relative to Start Date

| Vehicle | Sal gl mand/<br>sub., rt/BWt<br>(%) | Sal gl mand/<br>sub.,rt/BrWt<br>(ratio) | Spleen<br>(g) | Spleen/BWt<br>(%) | Spleen/BrWt<br>(ratio) | Testes<br>(g) | Testes/BWt<br>(%) |
|---------|-------------------------------------|-----------------------------------------|---------------|-------------------|------------------------|---------------|-------------------|
| 1001    | 0.0786                              | 0.1765                                  | 0.814         | 0.1689            | 0.3791                 | 3.734         | 0.7747            |
| 1002    | 0.0687                              | 0.1846                                  | 0.879         | 0.1646            | 0.4422                 | 3.631         | 0.6800            |
| 1003    | 0.0631                              | 0.1437                                  | 0.663         | 0.1280            | 0.2914                 | 3.745         | 0.7230            |
| 1004    | 0.0723                              | 0.1540                                  | 0.835         | 0.1690            | 0.3602                 | 3.716         | 0.7522            |
| 1005    | 0.0688                              | 0.1651                                  | 1.099         | 0.2142            | 0.5140                 | 3.659         | 0.7133            |

2759-001  
A Single Dose Toxicity Study of Test Article Administered by Intrathecal Injection in Rats

Individual Organ Weight Values  
Day 91

Sex: Male Day: 91 Relative to Start Date

| Vehicle | Testes/BrWt<br>(ratio) | Thymus<br>(g) | Thymus/BWt<br>(%) | Thymus/BrWt<br>(ratio) | Thyroid/para<br>(fixed)<br>(g) | Thyroid/para<br>(fixed)/BWt<br>(%) | Thyroid/para<br>(fixed)/BrWt<br>(ratio) |
|---------|------------------------|---------------|-------------------|------------------------|--------------------------------|------------------------------------|-----------------------------------------|
| 1001    | 1.7392                 | 0.203         | 0.0421            | 0.0946                 | 0.0311                         | 0.0065                             | 0.0145                                  |
| 1002    | 1.8265                 | 0.183         | 0.0343            | 0.0921                 | 0.0294                         | 0.0055                             | 0.0148                                  |
| 1003    | 1.6462                 | 0.257         | 0.0496            | 0.1130                 | 0.0384                         | 0.0074                             | 0.0169                                  |
| 1004    | 1.6031                 | 0.308         | 0.0623            | 0.1329                 | 0.0247                         | 0.0050                             | 0.0107                                  |
| 1005    | 1.7114                 | 0.272         | 0.0530            | 0.1272                 | 0.0180                         | 0.0035                             | 0.0084                                  |

2759-001  
 A Single Dose Toxicity Study of Test Article Administered by Intrathecal Injection in Rats

Individual Organ Weight Values  
 Day 91

Sex: Male Day: 91 Relative to Start Date

| Low Dose | Body Weight (g) | Brain (g) | Brain/BWt (%) | Adrenal glands (g) | Adrenal gl/ BWt (%) | Adrenal gl/ BrWt (ratio) | Epididymides (g) |
|----------|-----------------|-----------|---------------|--------------------|---------------------|--------------------------|------------------|
| 2001     | 484             | 2.117     | 0.4374        | 0.053              | 0.0110              | 0.0250                   | 1.617            |
| 2002     | 568             | 2.064     | 0.3634        | 0.087              | 0.0153              | 0.0422                   | 1.514            |
| 2003     | 436             | 2.076     | 0.4761        | 0.050              | 0.0115              | 0.0241                   | 1.530            |
| 2004     | 548             | 2.220     | 0.4051        | 0.072              | 0.0131              | 0.0324                   | 1.643            |
| 2005     | 466             | 2.237     | 0.4800        | 0.060              | 0.0129              | 0.0268                   | 1.524            |

2759-001  
 A Single Dose Toxicity Study of Test Article Administered by Intrathecal Injection in Rats

Individual Organ Weight Values  
 Day 91

Sex: Male Day: 91 Relative to Start Date

| Low Dose | Epididymides | Epididymides  | Heart | Heart/BWt | Heart/BrWt | Kidneys | Kidneys/BWt |
|----------|--------------|---------------|-------|-----------|------------|---------|-------------|
|          | /BWt (%)     | /BrWt (ratio) | (g)   | (%)       | (ratio)    | (g)     | (%)         |
| 2001     | 0.3341       | 0.7638        | 1.504 | 0.3107    | 0.7104     | 3.285   | 0.6787      |
| 2002     | 0.2665       | 0.7335        | 2.164 | 0.3810    | 1.0484     | 4.195   | 0.7386      |
| 2003     | 0.3509       | 0.7370        | 1.847 | 0.4236    | 0.8897     | 3.007   | 0.6897      |
| 2004     | 0.2998       | 0.7401        | 2.015 | 0.3677    | 0.9077     | 4.089   | 0.7462      |
| 2005     | 0.3270       | 0.6813        | 1.777 | 0.3813    | 0.7944     | 3.483   | 0.7474      |

2759-001  
A Single Dose Toxicity Study of Test Article Administered by Intrathecal Injection in Rats

Individual Organ Weight Values  
Day 91

Sex: Male Day: 91 Relative to Start Date

| Low Dose | Kidneys/BrWt | Liver  | Liver/BWt | Liver/BrWt | Lung  | Lung/BWt | Lung/BrWt |
|----------|--------------|--------|-----------|------------|-------|----------|-----------|
|          | (ratio)      | (g)    | (%)       | (ratio)    | (g)   | (%)      | (ratio)   |
| 2001     | 1.5517       | 14.626 | 3.0219    | 6.9088     | 1.991 | 0.4114   | 0.9405    |
| 2002     | 2.0325       | 19.161 | 3.3734    | 9.2834     | 2.459 | 0.4329   | 1.1914    |
| 2003     | 1.4485       | 12.403 | 2.8447    | 5.9745     | 1.723 | 0.3952   | 0.8300    |
| 2004     | 1.8419       | 17.337 | 3.1637    | 7.8095     | 2.138 | 0.3901   | 0.9631    |
| 2005     | 1.5570       | 13.035 | 2.7972    | 5.8270     | 2.219 | 0.4762   | 0.9920    |

2759-001  
 A Single Dose Toxicity Study of Test Article Administered by Intrathecal Injection in Rats

Individual Organ Weight Values  
 Day 91

Sex: Male Day: 91 Relative to Start Date

| Low Dose | Pituitary<br>(fixed)<br>(g) | Pituitary<br>(fixed)/BWt<br>(%) | Pituitary<br>(fixed)/BrWt<br>(ratio) | Prostate<br>gland<br>(g) | Prostate<br>gland/BWt<br>(%) | Prostate<br>gland/BrWt<br>(ratio) | Sal, mand/<br>sub., rt<br>(g) |
|----------|-----------------------------|---------------------------------|--------------------------------------|--------------------------|------------------------------|-----------------------------------|-------------------------------|
| 2001     | 0.0168                      | 0.0035                          | 0.0079                               | 1.448                    | 0.2992                       | 0.6840                            | 0.314                         |
| 2002     | 0.0191                      | 0.0034                          | 0.0093                               | 1.225                    | 0.2157                       | 0.5935                            | 0.388                         |
| 2003     | 0.0127                      | 0.0029                          | 0.0061                               | 1.143                    | 0.2622                       | 0.5506                            | 0.344                         |
| 2004     | 0.0170                      | 0.0031                          | 0.0077                               | 1.569                    | 0.2863                       | 0.7068                            | 0.370                         |
| 2005     | 0.0171                      | 0.0037                          | 0.0076                               | 1.587                    | 0.3406                       | 0.7094                            | 0.372                         |



2759-001  
 A Single Dose Toxicity Study of Test Article Administered by Intrathecal Injection in Rats

Individual Organ Weight Values  
 Day 91

Sex: Male Day: 91 Relative to Start Date

| Low Dose | Sal gl mand/<br>sub., rt/BWt<br>(%) | Sal gl mand/<br>sub.,rt/BrWt<br>(ratio) | Spleen<br>(g) | Spleen/BWt<br>(%) | Spleen/BrWt<br>(ratio) | Testes<br>(g) | Testes/BWt<br>(%) |
|----------|-------------------------------------|-----------------------------------------|---------------|-------------------|------------------------|---------------|-------------------|
|          | 2001                                | 0.0649                                  | 0.1483        | 0.872             | 0.1802                 | 0.4119        | 3.682             |
| 2002     | 0.0683                              | 0.1880                                  | 0.903         | 0.1590            | 0.4375                 | 3.595         | 0.6329            |
| 2003     | 0.0789                              | 0.1657                                  | 0.740         | 0.1697            | 0.3565                 | 3.774         | 0.8656            |
| 2004     | 0.0675                              | 0.1667                                  | 0.894         | 0.1631            | 0.4027                 | 3.759         | 0.6859            |
| 2005     | 0.0798                              | 0.1663                                  | 0.754         | 0.1618            | 0.3371                 | 3.609         | 0.7745            |

2759-001  
 A Single Dose Toxicity Study of Test Article Administered by Intrathecal Injection in Rats

Individual Organ Weight Values  
 Day 91

Sex: Male Day: 91 Relative to Start Date

| Low Dose | Testes/BrWt | Thymus | Thymus/BWt | Thymus/BrWt | Thyroid/para<br>(fixed) | Thyroid/para<br>(fixed)/BWt | Thyroid/para<br>(fixed)/BrWt |
|----------|-------------|--------|------------|-------------|-------------------------|-----------------------------|------------------------------|
|          | (ratio)     | (g)    | (%)        | (ratio)     | (g)                     | (%)                         | (ratio)                      |
| 2001     | 1.7393      | 0.233  | 0.0481     | 0.1101      | 0.0252                  | 0.0052                      | 0.0119                       |
| 2002     | 1.7418      | 0.353  | 0.0621     | 0.1710      | 0.0370                  | 0.0065                      | 0.0179                       |
| 2003     | 1.8179      | 0.350  | 0.0803     | 0.1686      | 0.0184                  | 0.0042                      | 0.0089                       |
| 2004     | 1.6932      | 0.301  | 0.0549     | 0.1356      | 0.0250                  | 0.0046                      | 0.0113                       |
| 2005     | 1.6133      | 0.145  | 0.0311     | 0.0648      | 0.0254                  | 0.0055                      | 0.0114                       |

2759-001  
 A Single Dose Toxicity Study of Test Article Administered by Intrathecal Injection in Rats

Individual Organ Weight Values  
 Day 91

Sex: Male Day: 91 Relative to Start Date

| Mid Dose | Body Weight (g) | Brain (g) | Brain/BWt (%) | Adrenal glands (g) | Adrenal gl/ BWt (%) | Adrenal gl/ BrWt (ratio) | Epididymides (g) |
|----------|-----------------|-----------|---------------|--------------------|---------------------|--------------------------|------------------|
| 3001     | 487             | 2.159     | 0.4433        | 0.096              | 0.0197              | 0.0445                   | 1.525            |
| 3002     | 523             | 2.056     | 0.3931        | 0.064              | 0.0122              | 0.0311                   | 1.544            |
| 3003     | 587             | 2.090     | 0.3560        | 0.056              | 0.0095              | 0.0268                   | 1.430            |
| 3004     | 545             | 2.157     | 0.3958        | 0.075              | 0.0138              | 0.0348                   | 1.673            |
| 3005     | 613             | 2.057     | 0.3356        | 0.061              | 0.0100              | 0.0297                   | 1.507            |

2759-001  
 A Single Dose Toxicity Study of Test Article Administered by Intrathecal Injection in Rats

Individual Organ Weight Values  
 Day 91

Sex: Male Day: 91 Relative to Start Date

| Mid Dose | Epididymides /BWt (%) | Epididymides /BrWt (ratio) | Heart (g) | Heart/BWt (%) | Heart/BrWt (ratio) | Kidneys (g) | Kidneys/BWt (%) |
|----------|-----------------------|----------------------------|-----------|---------------|--------------------|-------------|-----------------|
| 3001     | 0.3131                | 0.7063                     | 1.810     | 0.3717        | 0.8384             | 3.592       | 0.7376          |
| 3002     | 0.2952                | 0.7510                     | 1.955     | 0.3738        | 0.9509             | 3.845       | 0.7352          |
| 3003     | 0.2436                | 0.6842                     | 1.885     | 0.3211        | 0.9019             | 5.105       | 0.8697          |
| 3004     | 0.3070                | 0.7756                     | 1.634     | 0.2998        | 0.7575             | 3.935       | 0.7220          |
| 3005     | 0.2458                | 0.7326                     | 2.234     | 0.3644        | 1.0860             | 3.638       | 0.5935          |

2759-001  
A Single Dose Toxicity Study of Test Article Administered by Intrathecal Injection in Rats

Individual Organ Weight Values  
Day 91

Sex: Male Day: 91 Relative to Start Date

| Mid Dose | Kidneys/BrWt | Liver  | Liver/BWt | Liver/BrWt | Lung  | Lung/BWt | Lung/BrWt |
|----------|--------------|--------|-----------|------------|-------|----------|-----------|
|          | (ratio)      | (g)    | (%)       | (ratio)    | (g)   | (%)      | (ratio)   |
| 3001     | 1.6637       | 14.994 | 3.0789    | 6.9449     | 1.974 | 0.4053   | 0.9143    |
| 3002     | 1.8701       | 17.631 | 3.3711    | 8.5754     | 2.280 | 0.4359   | 1.1089    |
| 3003     | 2.4426       | 19.359 | 3.2980    | 9.2627     | 1.920 | 0.3271   | 0.9187    |
| 3004     | 1.8243       | 17.125 | 3.1422    | 7.9393     | 1.978 | 0.3629   | 0.9170    |
| 3005     | 1.7686       | 16.705 | 2.7251    | 8.1211     | 3.200 | 0.5220   | 1.5557    |

2759-001  
 A Single Dose Toxicity Study of Test Article Administered by Intrathecal Injection in Rats

Individual Organ Weight Values  
 Day 91

Sex: Male Day: 91 Relative to Start Date

| Mid Dose | Pituitary<br>(fixed)<br>(g) | Pituitary<br>(fixed)/BWt<br>(%) | Pituitary<br>(fixed)/BrWt<br>(ratio) | Prostate<br>gland<br>(g) | Prostate<br>gland/BWt<br>(%) | Prostate<br>gland/BrWt<br>(ratio) | Sal, mand/<br>sub., rt<br>(g) |
|----------|-----------------------------|---------------------------------|--------------------------------------|--------------------------|------------------------------|-----------------------------------|-------------------------------|
| 3001     | 0.0152                      | 0.0031                          | 0.0070                               | 1.499                    | 0.3078                       | 0.6943                            | 0.405                         |
| 3002     | 0.0186                      | 0.0036                          | 0.0090                               | 1.326                    | 0.2535                       | 0.6449                            | 0.464                         |
| 3003     | 0.0186                      | 0.0032                          | 0.0089                               | 1.230                    | 0.2095                       | 0.5885                            | 0.419                         |
| 3004     | 0.0185                      | 0.0034                          | 0.0086                               | 2.025                    | 0.3716                       | 0.9388                            | 0.487                         |
| 3005     | 0.0183                      | 0.0030                          | 0.0089                               | 1.446                    | 0.2359                       | 0.7030                            | 0.273                         |

2759-001  
A Single Dose Toxicity Study of Test Article Administered by Intrathecal Injection in Rats

Individual Organ Weight Values  
Day 91

Sex: Male Day: 91 Relative to Start Date

| Mid Dose | Sal gl mand/<br>sub., rt/BWt<br>(%) | Sal gl mand/<br>sub.,rt/BrWt<br>(ratio) | Spleen<br>(g) | Spleen/BWt<br>(%) | Spleen/BrWt<br>(ratio) | Testes<br>(g) | Testes/BWt<br>(%) |
|----------|-------------------------------------|-----------------------------------------|---------------|-------------------|------------------------|---------------|-------------------|
|          | 3001                                | 0.0832                                  | 0.1876        | 0.976             | 0.2004                 | 0.4521        | 3.323             |
| 3002     | 0.0887                              | 0.2257                                  | 0.770         | 0.1472            | 0.3745                 | 3.604         | 0.6891            |
| 3003     | 0.0714                              | 0.2005                                  | 0.878         | 0.1496            | 0.4201                 | 4.151         | 0.7072            |
| 3004     | 0.0894                              | 0.2258                                  | 0.922         | 0.1692            | 0.4274                 | 3.737         | 0.6857            |
| 3005     | 0.0445                              | 0.1327                                  | 0.872         | 0.1423            | 0.4239                 | 3.544         | 0.5781            |

2759-001  
 A Single Dose Toxicity Study of Test Article Administered by Intrathecal Injection in Rats

Individual Organ Weight Values  
 Day 91

Sex: Male Day: 91 Relative to Start Date

| Mid Dose | Testes/BrWt | Thymus | Thymus/BWt | Thymus/BrWt | Thyroid/para<br>(fixed) | Thyroid/para<br>(fixed)/BWt | Thyroid/para<br>(fixed)/BrWt |
|----------|-------------|--------|------------|-------------|-------------------------|-----------------------------|------------------------------|
|          | (ratio)     | (g)    | (%)        | (ratio)     | (g)                     | (%)                         | (ratio)                      |
| 3001     | 1.5391      | 0.391  | 0.0803     | 0.1811      | 0.0285                  | 0.0059                      | 0.0132                       |
| 3002     | 1.7529      | 0.384  | 0.0734     | 0.1868      | 0.0287                  | 0.0055                      | 0.0140                       |
| 3003     | 1.9861      | 0.257  | 0.0438     | 0.1230      | 0.0294                  | 0.0050                      | 0.0141                       |
| 3004     | 1.7325      | 0.329  | 0.0604     | 0.1525      | 0.0420                  | 0.0077                      | 0.0195                       |
| 3005     | 1.7229      | 0.435  | 0.0710     | 0.2115      | 0.0351                  | 0.0057                      | 0.0171                       |





2759-001  
 A Single Dose Toxicity Study of Test Article Administered by Intrathecal Injection in Rats

Individual Organ Weight Values  
 Day 91

Sex: Male Day: 91 Relative to Start Date

| High Dose | Body Weight (g) | Brain (g) | Brain/BWt (%) | Adrenal glands (g) | Adrenal gl/ BWt (%) | Adrenal gl/ BrWt (ratio) | Epididymides (g) |
|-----------|-----------------|-----------|---------------|--------------------|---------------------|--------------------------|------------------|
| 4001      | 634             | 2.174     | 0.3429        | 0.069              | 0.0109              | 0.0317                   | 1.451            |
| 4002      | 331             | 2.190     | 0.6616        | 0.059              | 0.0178              | 0.0269                   | 1.349            |
| 4003      | 483             | 2.040     | 0.4224        | 0.063              | 0.0130              | 0.0309                   | 1.477            |
| 4004      | 658             | 2.086     | 0.3170        | 0.088              | 0.0134              | 0.0422                   | 1.574            |
| 4005      | 564             | 2.119     | 0.3757        | 0.062              | 0.0110              | 0.0293                   | 1.532            |

2759-001  
 A Single Dose Toxicity Study of Test Article Administered by Intrathecal Injection in Rats

Individual Organ Weight Values  
 Day 91

Sex: Male Day: 91 Relative to Start Date

| High Dose | Epididymides | Epididymides  | Heart | Heart/BWt | Heart/BrWt | Kidneys | Kidneys/BWt |
|-----------|--------------|---------------|-------|-----------|------------|---------|-------------|
|           | /BWt (%)     | /BrWt (ratio) | (g)   | (%)       | (ratio)    | (g)     | (%)         |
| 4001      | 0.2289       | 0.6674        | 2.317 | 0.3655    | 1.0658     | 4.252   | 0.6707      |
| 4002      | 0.4076       | 0.6160        | 1.694 | 0.5118    | 0.7735     | 3.853   | 1.1640      |
| 4003      | 0.3058       | 0.7240        | 1.805 | 0.3737    | 0.8848     | 3.189   | 0.6602      |
| 4004      | 0.2392       | 0.7546        | 2.490 | 0.3784    | 1.1937     | 4.101   | 0.6233      |
| 4005      | 0.2716       | 0.7230        | 2.101 | 0.3725    | 0.9915     | 3.813   | 0.6761      |

2759-001  
 A Single Dose Toxicity Study of Test Article Administered by Intrathecal Injection in Rats

Individual Organ Weight Values  
 Day 91

Sex: Male Day: 91 Relative to Start Date

| High Dose | Kidneys/BrWt | Liver  | Liver/BWt | Liver/BrWt | Lung  | Lung/BWt | Lung/BrWt |
|-----------|--------------|--------|-----------|------------|-------|----------|-----------|
|           | (ratio)      | (g)    | (%)       | (ratio)    | (g)   | (%)      | (ratio)   |
| 4001      | 1.9558       | 18.486 | 2.9158    | 8.5032     | 1.822 | 0.2874   | 0.8381    |
| 4002      | 1.7594       | 17.113 | 5.1701    | 7.8142     | 1.777 | 0.5369   | 0.8114    |
| 4003      | 1.5632       | 14.114 | 2.9222    | 6.9186     | 2.019 | 0.4180   | 0.9897    |
| 4004      | 1.9660       | 20.480 | 3.1125    | 9.8178     | 1.970 | 0.2994   | 0.9444    |
| 4005      | 1.7994       | 17.561 | 3.1137    | 8.2874     | 2.753 | 0.4881   | 1.2992    |

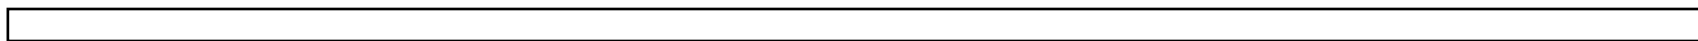

2759-001  
 A Single Dose Toxicity Study of Test Article Administered by Intrathecal Injection in Rats

Individual Organ Weight Values  
 Day 91

Sex: Male Day: 91 Relative to Start Date

| High Dose | Pituitary<br>(fixed)<br>(g) | Pituitary<br>(fixed)/BWt<br>(%) | Pituitary<br>(fixed)/BrWt<br>(ratio) | Prostate<br>gland<br>(g) | Prostate<br>gland/BWt<br>(%) | Prostate<br>gland/BrWt<br>(ratio) | Sal, mand/<br>sub., rt<br>(g) |
|-----------|-----------------------------|---------------------------------|--------------------------------------|--------------------------|------------------------------|-----------------------------------|-------------------------------|
| 4001      | 0.0179                      | 0.0028                          | 0.0082                               | 1.534                    | 0.2420                       | 0.7056                            | 0.373                         |
| 4002      | 0.0181                      | 0.0055                          | 0.0083                               | 1.238                    | 0.3740                       | 0.5653                            | 0.493                         |
| 4003      | 0.0138                      | 0.0029                          | 0.0068                               | 1.285                    | 0.2660                       | 0.6299                            | 0.295                         |
| 4004      | 0.0140                      | 0.0021                          | 0.0067                               | 1.682                    | 0.2556                       | 0.8063                            | 0.406                         |
| 4005      | 0.0173                      | 0.0031                          | 0.0082                               | 1.913                    | 0.3392                       | 0.9028                            | 0.373                         |

2759-001  
A Single Dose Toxicity Study of Test Article Administered by Intrathecal Injection in Rats

Individual Organ Weight Values  
Day 91

Sex: Male Day: 91 Relative to Start Date

| High Dose | Sal gl mand/<br>sub., rt/BWt<br>(%) | Sal gl mand/<br>sub.,rt/BrWt<br>(ratio) | Spleen<br>(g) | Spleen/BWt<br>(%) | Spleen/BrWt<br>(ratio) | Testes<br>(g) | Testes/BWt<br>(%) |
|-----------|-------------------------------------|-----------------------------------------|---------------|-------------------|------------------------|---------------|-------------------|
|           | 4001                                | 0.0588                                  | 0.1716        | 1.036             | 0.1634                 | 0.4765        | 3.199             |
| 4002      | 0.1489                              | 0.2251                                  | 1.065         | 0.3218            | 0.4863                 | 3.407         | 1.0293            |
| 4003      | 0.0611                              | 0.1446                                  | 0.931         | 0.1928            | 0.4564                 | 3.350         | 0.6936            |
| 4004      | 0.0617                              | 0.1946                                  | 1.005         | 0.1527            | 0.4818                 | 3.794         | 0.5766            |
| 4005      | 0.0661                              | 0.1760                                  | 1.016         | 0.1801            | 0.4795                 | 3.660         | 0.6489            |

2759-001  
A Single Dose Toxicity Study of Test Article Administered by Intrathecal Injection in Rats

Individual Organ Weight Values  
Day 91

Sex: Male Day: 91 Relative to Start Date

| High Dose | Testes/BrWt | Thymus | Thymus/BWt | Thymus/BrWt | Thyroid/para<br>(fixed) | Thyroid/para<br>(fixed)/BWt | Thyroid/para<br>(fixed)/BrWt |
|-----------|-------------|--------|------------|-------------|-------------------------|-----------------------------|------------------------------|
|           | (ratio)     | (g)    | (%)        | (ratio)     | (g)                     | (%)                         | (ratio)                      |
| 4001      | 1.4715      | 0.438  | 0.0691     | 0.2015      | 0.0380                  | 0.0060                      | 0.0175                       |
| 4002      | 1.5557      | 0.248  | 0.0749     | 0.1132      | 0.0318                  | 0.0096                      | 0.0145                       |
| 4003      | 1.6422      | 0.380  | 0.0787     | 0.1863      | 0.0288                  | 0.0060                      | 0.0141                       |
| 4004      | 1.8188      | 0.554  | 0.0842     | 0.2656      | 0.0276                  | 0.0042                      | 0.0132                       |
| 4005      | 1.7272      | 0.393  | 0.0697     | 0.1855      | 0.0268                  | 0.0048                      | 0.0126                       |

2759-001  
 A Single Dose Toxicity Study of Test Article Administered by Intrathecal Injection in Rats

Individual Organ Weight Values  
 Day 91

Sex: Female Day: 91 Relative to Start Date

| Vehicle | Body Weight (g) | Brain (g) | Brain/BWt (%) | Adrenal glands (g) | Adrenal gl/ BWt (%) | Adrenal gl/ BrWt (ratio) | Heart (g) |
|---------|-----------------|-----------|---------------|--------------------|---------------------|--------------------------|-----------|
| 1501    | 284             | 1.858     | 0.6542        | 0.071              | 0.0250              | 0.0382                   | 1.104     |
| 1502    | 285             | 2.052     | 0.7200        | 0.075              | 0.0263              | 0.0365                   | 1.162     |
| 1503    | 294             | 1.959     | 0.6663        | 0.069              | 0.0235              | 0.0352                   | 1.215     |
| 1504    | 237             | 1.895     | 0.7996        | 0.062              | 0.0262              | 0.0327                   | 0.863     |
| 1505    | 297             | 1.906     | 0.6418        | 0.069              | 0.0232              | 0.0362                   | 1.200     |

2759-001  
 A Single Dose Toxicity Study of Test Article Administered by Intrathecal Injection in Rats

Individual Organ Weight Values  
 Day 91

Sex: Female Day: 91 Relative to Start Date

| Vehicle | Heart/BWt | Heart/BrWt | Kidneys | Kidneys/BWt | Kidneys/BrWt | Liver  | Liver/BWt |
|---------|-----------|------------|---------|-------------|--------------|--------|-----------|
|         | (%)       | (ratio)    | (g)     | (%)         | (ratio)      | (g)    | (%)       |
| 1501    | 0.3887    | 0.5942     | 1.988   | 0.7000      | 1.0700       | 9.652  | 3.3986    |
| 1502    | 0.4077    | 0.5663     | 2.211   | 0.7758      | 1.0775       | 11.195 | 3.9281    |
| 1503    | 0.4133    | 0.6202     | 2.287   | 0.7779      | 1.1674       | 10.781 | 3.6670    |
| 1504    | 0.3641    | 0.4554     | 1.783   | 0.7523      | 0.9409       | 8.439  | 3.5608    |
| 1505    | 0.4040    | 0.6296     | 2.216   | 0.7461      | 1.1626       | 8.072  | 2.7178    |



2759-001  
 A Single Dose Toxicity Study of Test Article Administered by Intrathecal Injection in Rats

Individual Organ Weight Values  
 Day 91

Sex: Female Day: 91 Relative to Start Date

| Vehicle | Liver/BrWt | Lung  | Lung/BWt | Lung/BrWt | Ovaries | Ovaries/BWt | Ovaries/BrWt |
|---------|------------|-------|----------|-----------|---------|-------------|--------------|
|         | (ratio)    | (g)   | (%)      | (ratio)   | (g)     | (%)         | (ratio)      |
| 1501    | 5.1948     | 1.369 | 0.4820   | 0.7368    | 0.083   | 0.0292      | 0.0447       |
| 1502    | 5.4557     | 1.519 | 0.5330   | 0.7403    | 0.117   | 0.0411      | 0.0570       |
| 1503    | 5.5033     | 1.317 | 0.4480   | 0.6723    | 0.043   | 0.0146      | 0.0219       |
| 1504    | 4.4533     | 1.238 | 0.5224   | 0.6533    | 0.076   | 0.0321      | 0.0401       |
| 1505    | 4.2350     | 1.591 | 0.5357   | 0.8347    | 0.115   | 0.0387      | 0.0603       |

2759-001  
 A Single Dose Toxicity Study of Test Article Administered by Intrathecal Injection in Rats

Individual Organ Weight Values  
 Day 91

Sex: Female Day: 91 Relative to Start Date

| Vehicle | Oviducts<br>(g) | Oviducts/BWt<br>(%) | Oviducts/<br>BrWt<br>(ratio) | Pituitary<br>(fixed)<br>(g) | Pituitary<br>(fixed)/BWt<br>(%) | Pituitary<br>(fixed)/BrWt<br>(ratio) | Sal, mand/<br>sub., rt<br>(g) |
|---------|-----------------|---------------------|------------------------------|-----------------------------|---------------------------------|--------------------------------------|-------------------------------|
| 1501    | 0.039           | 0.0137              | 0.0210                       | 0.0178                      | 0.0063                          | 0.0096                               | 0.192                         |
| 1502    | 0.018           | 0.0063              | 0.0088                       | 0.0226                      | 0.0079                          | 0.0110                               | 0.242                         |
| 1503    | 0.041           | 0.0139              | 0.0209                       | 0.0289                      | 0.0098                          | 0.0148                               | 0.221                         |
| 1504    | 0.021           | 0.0089              | 0.0111                       | 0.0185                      | 0.0078                          | 0.0098                               | 0.192                         |
| 1505    | 0.032           | 0.0108              | 0.0168                       | 0.0234                      | 0.0079                          | 0.0123                               | 0.220                         |

2759-001  
 A Single Dose Toxicity Study of Test Article Administered by Intrathecal Injection in Rats

Individual Organ Weight Values  
 Day 91

Sex: Female Day: 91 Relative to Start Date

| Vehicle | Sal gl mand/<br>sub., rt/BWt<br>(%) | Sal gl mand/<br>sub.,rt/BrWt<br>(ratio) | Spleen<br>(g) | Spleen/BWt<br>(%) | Spleen/BrWt<br>(ratio) | Thymus<br>(g) | Thymus/BWt<br>(%) |
|---------|-------------------------------------|-----------------------------------------|---------------|-------------------|------------------------|---------------|-------------------|
| 1501    | 0.0676                              | 0.1033                                  | 0.454         | 0.1599            | 0.2443                 | 0.395         | 0.1391            |
| 1502    | 0.0849                              | 0.1179                                  | 0.543         | 0.1905            | 0.2646                 | 0.316         | 0.1109            |
| 1503    | 0.0752                              | 0.1128                                  | 0.558         | 0.1898            | 0.2848                 | 0.254         | 0.0864            |
| 1504    | 0.0810                              | 0.1013                                  | 0.473         | 0.1996            | 0.2496                 | 0.227         | 0.0958            |
| 1505    | 0.0741                              | 0.1154                                  | 0.565         | 0.1902            | 0.2964                 | 0.318         | 0.1071            |

2759-001  
 A Single Dose Toxicity Study of Test Article Administered by Intrathecal Injection in Rats

Individual Organ Weight Values  
 Day 91

Sex: Female Day: 91 Relative to Start Date

| Vehicle | Thymus/BrWt<br>(ratio) | Thyroid/para<br>(fixed)<br>(g) | Thyroid/para<br>(fixed)/BWt<br>(%) | Thyroid/para<br>(fixed)/BrWt<br>(ratio) | Uterus w/<br>cervix<br>(g) | Uterus w/<br>cervix/BWt<br>(%) | Uterus w/<br>cervix/BrWt<br>(ratio) |
|---------|------------------------|--------------------------------|------------------------------------|-----------------------------------------|----------------------------|--------------------------------|-------------------------------------|
| 1501    | 0.2126                 | 0.0186                         | 0.0065                             | 0.0100                                  | 0.612                      | 0.2155                         | 0.3294                              |
| 1502    | 0.1540                 | 0.0287                         | 0.0101                             | 0.0140                                  | 0.595                      | 0.2088                         | 0.2900                              |
| 1503    | 0.1297                 | 0.0185                         | 0.0063                             | 0.0094                                  | 0.477                      | 0.1622                         | 0.2435                              |
| 1504    | 0.1198                 | 0.0219                         | 0.0092                             | 0.0116                                  | 0.554                      | 0.2338                         | 0.2923                              |
| 1505    | 0.1668                 | 0.0223                         | 0.0075                             | 0.0117                                  | 0.543                      | 0.1828                         | 0.2849                              |

2759-001  
 A Single Dose Toxicity Study of Test Article Administered by Intrathecal Injection in Rats

Individual Organ Weight Values  
 Day 91

Sex: Female Day: 91 Relative to Start Date

| Low Dose | Body Weight (g) | Brain (g) | Brain/BWt (%) | Adrenal glands (g) | Adrenal gl/ BWt (%) | Adrenal gl/ BrWt (ratio) | Heart (g) |
|----------|-----------------|-----------|---------------|--------------------|---------------------|--------------------------|-----------|
| 2501     | 286             | 1.867     | 0.6528        | 0.099              | 0.0346              | 0.0530                   | 1.275     |
| 2502     | 284             | 2.165     | 0.7623        | 0.046              | 0.0162              | 0.0212                   | 1.169     |
| 2503     | 260             | 1.967     | 0.7565        | 0.045              | 0.0173              | 0.0229                   | 0.873     |
| 2504     | 238             | 1.894     | 0.7958        | 0.073              | 0.0307              | 0.0385                   | 0.914     |
| 2505     | 279             | 1.958     | 0.7018        | 0.080              | 0.0287              | 0.0409                   | 1.160     |

2759-001  
 A Single Dose Toxicity Study of Test Article Administered by Intrathecal Injection in Rats

Individual Organ Weight Values  
 Day 91

Sex: Female Day: 91 Relative to Start Date

| Low Dose | Heart/BWt | Heart/BrWt | Kidneys | Kidneys/BWt | Kidneys/BrWt | Liver  | Liver/BWt |
|----------|-----------|------------|---------|-------------|--------------|--------|-----------|
|          | (%)       | (ratio)    | (g)     | (%)         | (ratio)      | (g)    | (%)       |
| 2501     | 0.4458    | 0.6829     | 2.226   | 0.7783      | 1.1923       | 9.849  | 3.4437    |
| 2502     | 0.4116    | 0.5400     | 2.376   | 0.8366      | 1.0975       | 10.036 | 3.5338    |
| 2503     | 0.3358    | 0.4438     | 1.883   | 0.7242      | 0.9573       | 8.120  | 3.1231    |
| 2504     | 0.3840    | 0.4826     | 1.947   | 0.8181      | 1.0280       | 7.700  | 3.2353    |
| 2505     | 0.4158    | 0.5924     | 2.060   | 0.7384      | 1.0521       | 9.438  | 3.3828    |

2759-001  
 A Single Dose Toxicity Study of Test Article Administered by Intrathecal Injection in Rats

Individual Organ Weight Values  
 Day 91

Sex: Female Day: 91 Relative to Start Date

| Low Dose | Liver/BrWt | Lung  | Lung/BWt | Lung/BrWt | Ovaries | Ovaries/BWt | Ovaries/BrWt |
|----------|------------|-------|----------|-----------|---------|-------------|--------------|
|          | (ratio)    | (g)   | (%)      | (ratio)   | (g)     | (%)         | (ratio)      |
| 2501     | 5.2753     | 1.292 | 0.4517   | 0.6920    | 0.067   | 0.0234      | 0.0359       |
| 2502     | 4.6356     | 1.496 | 0.5268   | 0.6910    | 0.103   | 0.0363      | 0.0476       |
| 2503     | 4.1281     | 1.110 | 0.4269   | 0.5643    | 0.069   | 0.0265      | 0.0351       |
| 2504     | 4.0655     | 1.395 | 0.5861   | 0.7365    | 0.075   | 0.0315      | 0.0396       |
| 2505     | 4.8202     | 1.547 | 0.5545   | 0.7901    | 0.071   | 0.0254      | 0.0363       |

2759-001  
 A Single Dose Toxicity Study of Test Article Administered by Intrathecal Injection in Rats

Individual Organ Weight Values  
 Day 91

Sex: Female Day: 91 Relative to Start Date

| Low Dose | Oviducts | Oviducts/BWt | Oviducts/<br>BrWt | Pituitary<br>(fixed) | Pituitary<br>(fixed)/BWt | Pituitary<br>(fixed)/BrWt | Sal, mand/<br>sub., rt |
|----------|----------|--------------|-------------------|----------------------|--------------------------|---------------------------|------------------------|
|          | (g)      | (%)          | (ratio)           | (g)                  | (%)                      | (ratio)                   | (g)                    |
| 2501     | 0.024    | 0.0084       | 0.0129            | 0.0173               | 0.0060                   | 0.0093                    | 0.231                  |
| 2502     | 0.018    | 0.0063       | 0.0083            | 0.0186               | 0.0065                   | 0.0086                    | 0.251                  |
| 2503     | 0.021    | 0.0081       | 0.0107            | 0.0165               | 0.0063                   | 0.0084                    | 0.203                  |
| 2504     | 0.040    | 0.0168       | 0.0211            | 0.0233               | 0.0098                   | 0.0123                    | 0.185                  |
| 2505     | 0.016    | 0.0057       | 0.0082            | 0.0295               | 0.0106                   | 0.0151                    | 0.180                  |



2759-001  
A Single Dose Toxicity Study of Test Article Administered by Intrathecal Injection in Rats

Individual Organ Weight Values  
Day 91

Sex: Female Day: 91 Relative to Start Date

| Low Dose | Sal gl mand/<br>sub., rt/BWt<br>(%) | Sal gl mand/<br>sub.,rt/BrWt<br>(ratio) | Spleen<br>(g) | Spleen/BWt<br>(%) | Spleen/BrWt<br>(ratio) | Thymus<br>(g) | Thymus/BWt<br>(%) |
|----------|-------------------------------------|-----------------------------------------|---------------|-------------------|------------------------|---------------|-------------------|
|          | 2501                                | 0.0808                                  | 0.1237        | 0.469             | 0.1640                 | 0.2512        | 0.325             |
| 2502     | 0.0884                              | 0.1159                                  | 0.622         | 0.2190            | 0.2873                 | 0.275         | 0.0968            |
| 2503     | 0.0781                              | 0.1032                                  | 0.575         | 0.2212            | 0.2923                 | 0.237         | 0.0912            |
| 2504     | 0.0777                              | 0.0977                                  | 0.402         | 0.1689            | 0.2122                 | 0.199         | 0.0836            |
| 2505     | 0.0645                              | 0.0919                                  | 0.469         | 0.1681            | 0.2395                 | 0.369         | 0.1323            |

2759-001  
 A Single Dose Toxicity Study of Test Article Administered by Intrathecal Injection in Rats

Individual Organ Weight Values  
 Day 91

Sex: Female Day: 91 Relative to Start Date

| Low Dose | Thymus/BrWt<br>(ratio) | Thyroid/para<br>(fixed)<br>(g) | Thyroid/para<br>(fixed)/BWt<br>(%) | Thyroid/para<br>(fixed)/BrWt<br>(ratio) | Uterus w/<br>cervix<br>(g) | Uterus w/<br>cervix/BWt<br>(%) | Uterus w/<br>cervix/BrWt<br>(ratio) |
|----------|------------------------|--------------------------------|------------------------------------|-----------------------------------------|----------------------------|--------------------------------|-------------------------------------|
| 2501     | 0.1741                 | 0.0250                         | 0.0087                             | 0.0134                                  | 0.671                      | 0.2346                         | 0.3594                              |
| 2502     | 0.1270                 | 0.0229                         | 0.0081                             | 0.0106                                  | 0.444                      | 0.1563                         | 0.2051                              |
| 2503     | 0.1205                 | 0.0193                         | 0.0074                             | 0.0098                                  | 0.619                      | 0.2381                         | 0.3147                              |
| 2504     | 0.1051                 | 0.0194                         | 0.0082                             | 0.0102                                  | 0.435                      | 0.1828                         | 0.2297                              |
| 2505     | 0.1885                 | 0.0203                         | 0.0073                             | 0.0104                                  | 0.838                      | 0.3004                         | 0.4280                              |

2759-001  
 A Single Dose Toxicity Study of Test Article Administered by Intrathecal Injection in Rats

Individual Organ Weight Values  
 Day 91

Sex: Female Day: 91 Relative to Start Date

| Mid Dose | Body Weight (g) | Brain (g) | Brain/BWt (%) | Adrenal glands (g) | Adrenal gl/ BWt (%) | Adrenal gl/ BrWt (ratio) | Heart (g) |
|----------|-----------------|-----------|---------------|--------------------|---------------------|--------------------------|-----------|
| 3501     | 272             | 2.112     | 0.7765        | 0.105              | 0.0386              | 0.0497                   | 1.390     |
| 3502     | 296             | 1.878     | 0.6345        | 0.091              | 0.0307              | 0.0485                   | 1.322     |
| 3503     | 259             | 2.004     | 0.7737        | 0.082              | 0.0317              | 0.0409                   | 1.060     |
| 3504     | 257             | 1.946     | 0.7572        | 0.091              | 0.0354              | 0.0468                   | 1.266     |
| 3505     | 256             | 1.949     | 0.7613        | 0.077              | 0.0301              | 0.0395                   | 1.049     |

2759-001  
 A Single Dose Toxicity Study of Test Article Administered by Intrathecal Injection in Rats

Individual Organ Weight Values  
 Day 91

Sex: Female Day: 91 Relative to Start Date

| Mid Dose | Heart/BWt | Heart/BrWt | Kidneys | Kidneys/BWt | Kidneys/BrWt | Liver  | Liver/BWt |
|----------|-----------|------------|---------|-------------|--------------|--------|-----------|
|          | (%)       | (ratio)    | (g)     | (%)         | (ratio)      | (g)    | (%)       |
| 3501     | 0.5110    | 0.6581     | 2.516   | 0.9250      | 1.1913       | 9.623  | 3.5379    |
| 3502     | 0.4466    | 0.7039     | 2.297   | 0.7760      | 1.2231       | 10.062 | 3.3993    |
| 3503     | 0.4093    | 0.5289     | 2.190   | 0.8456      | 1.0928       | 8.323  | 3.2135    |
| 3504     | 0.4926    | 0.6506     | 2.372   | 0.9230      | 1.2189       | 8.757  | 3.4074    |
| 3505     | 0.4098    | 0.5382     | 2.022   | 0.7898      | 1.0375       | 9.086  | 3.5492    |

2759-001  
 A Single Dose Toxicity Study of Test Article Administered by Intrathecal Injection in Rats

Individual Organ Weight Values  
 Day 91

Sex: Female Day: 91 Relative to Start Date

| Mid Dose | Liver/BrWt | Lung  | Lung/BWt | Lung/BrWt | Ovaries | Ovaries/BWt | Ovaries/BrWt |
|----------|------------|-------|----------|-----------|---------|-------------|--------------|
|          | (ratio)    | (g)   | (%)      | (ratio)   | (g)     | (%)         | (ratio)      |
| 3501     | 4.5563     | 1.591 | 0.5849   | 0.7533    | 0.111   | 0.0408      | 0.0526       |
| 3502     | 5.3578     | 1.339 | 0.4524   | 0.7130    | 0.062   | 0.0209      | 0.0330       |
| 3503     | 4.1532     | 1.539 | 0.5942   | 0.7680    | 0.096   | 0.0371      | 0.0479       |
| 3504     | 4.5000     | 1.413 | 0.5498   | 0.7261    | 0.088   | 0.0342      | 0.0452       |
| 3505     | 4.6619     | 1.332 | 0.5203   | 0.6834    | 0.091   | 0.0355      | 0.0467       |

2759-001  
A Single Dose Toxicity Study of Test Article Administered by Intrathecal Injection in Rats

Individual Organ Weight Values  
Day 91

Sex: Female Day: 91 Relative to Start Date

| Mid Dose | Oviducts | Oviducts/BWt | Oviducts/<br>BrWt | Pituitary<br>(fixed) | Pituitary<br>(fixed)/BWt | Pituitary<br>(fixed)/BrWt | Sal, mand/<br>sub., rt |
|----------|----------|--------------|-------------------|----------------------|--------------------------|---------------------------|------------------------|
|          | (g)      | (%)          | (ratio)           | (g)                  | (%)                      | (ratio)                   | (g)                    |
| 3501     | 0.031    | 0.0114       | 0.0147            | 0.0221               | 0.0081                   | 0.0105                    | 0.237                  |
| 3502     | 0.027    | 0.0091       | 0.0144            | 0.0329               | 0.0111                   | 0.0175                    | 0.223                  |
| 3503     | 0.037    | 0.0143       | 0.0185            | 0.0228               | 0.0088                   | 0.0114                    | 0.195                  |
| 3504     | 0.027    | 0.0105       | 0.0139            | 0.0265               | 0.0103                   | 0.0136                    | 0.276                  |
| 3505     | 0.038    | 0.0148       | 0.0195            | 0.0235               | 0.0092                   | 0.0121                    | 0.213                  |

2759-001  
 A Single Dose Toxicity Study of Test Article Administered by Intrathecal Injection in Rats

Individual Organ Weight Values  
 Day 91

Sex: Female Day: 91 Relative to Start Date

| Mid Dose | Sal gl mand/<br>sub., rt/BWt<br>(%) | Sal gl mand/<br>sub.,rt/BrWt<br>(ratio) | Spleen<br>(g) | Spleen/BWt<br>(%) | Spleen/BrWt<br>(ratio) | Thymus<br>(g) | Thymus/BWt<br>(%) |
|----------|-------------------------------------|-----------------------------------------|---------------|-------------------|------------------------|---------------|-------------------|
|          | 3501                                | 0.0871                                  | 0.1122        | 0.661             | 0.2430                 | 0.3130        | 0.293             |
| 3502     | 0.0753                              | 0.1187                                  | 0.521         | 0.1760            | 0.2774                 | 0.333         | 0.1125            |
| 3503     | 0.0753                              | 0.0973                                  | 0.659         | 0.2544            | 0.3288                 | 0.310         | 0.1197            |
| 3504     | 0.1074                              | 0.1418                                  | 0.524         | 0.2039            | 0.2693                 | 0.263         | 0.1023            |
| 3505     | 0.0832                              | 0.1093                                  | 0.552         | 0.2156            | 0.2832                 | 0.270         | 0.1055            |

2759-001  
 A Single Dose Toxicity Study of Test Article Administered by Intrathecal Injection in Rats

Individual Organ Weight Values  
 Day 91

Sex: Female Day: 91 Relative to Start Date

| Mid Dose | Thymus/BrWt<br>(ratio) | Thyroid/para<br>(fixed)<br>(g) | Thyroid/para<br>(fixed)/BWt<br>(%) | Thyroid/para<br>(fixed)/BrWt<br>(ratio) | Uterus w/<br>cervix<br>(g) | Uterus w/<br>cervix/BWt<br>(%) | Uterus w/<br>cervix/BrWt<br>(ratio) |
|----------|------------------------|--------------------------------|------------------------------------|-----------------------------------------|----------------------------|--------------------------------|-------------------------------------|
| 3501     | 0.1387                 | 0.0244                         | 0.0090                             | 0.0116                                  | 0.511                      | 0.1879                         | 0.2420                              |
| 3502     | 0.1773                 | 0.0201                         | 0.0068                             | 0.0107                                  | 0.674                      | 0.2277                         | 0.3589                              |
| 3503     | 0.1547                 | 0.0207                         | 0.0080                             | 0.0103                                  | 1.222                      | 0.4718                         | 0.6098                              |
| 3504     | 0.1351                 | 0.0188                         | 0.0073                             | 0.0097                                  | 0.699                      | 0.2720                         | 0.3592                              |
| 3505     | 0.1385                 | 0.0208                         | 0.0081                             | 0.0107                                  | 1.062                      | 0.4148                         | 0.5449                              |





2759-001  
A Single Dose Toxicity Study of Test Article Administered by Intrathecal Injection in Rats

Individual Organ Weight Values  
Day 91

Sex: Female Day: 91 Relative to Start Date

| High Dose | Body Weight (g) | Brain (g) | Brain/BWt (%) | Adrenal glands (g) | Adrenal gl/ BWt (%) | Adrenal gl/ BrWt (ratio) | Heart (g) |
|-----------|-----------------|-----------|---------------|--------------------|---------------------|--------------------------|-----------|
| 4501      | 298             | 2.186     | 0.7336        | 0.084              | 0.0282              | 0.0384                   | 1.293     |
| 4502      | 329             | 1.904     | 0.5787        | 0.103              | 0.0313              | 0.0541                   | 1.349     |
| 4503      | 276             | 1.911     | 0.6924        | 0.081              | 0.0293              | 0.0424                   | 1.169     |
| 4504      | 320             | 1.888     | 0.5900        | 0.062              | 0.0194              | 0.0328                   | 1.267     |
| 4505      | 285             | 1.939     | 0.6804        | 0.103              | 0.0361              | 0.0531                   | 0.989     |

2759-001  
 A Single Dose Toxicity Study of Test Article Administered by Intrathecal Injection in Rats

Individual Organ Weight Values  
 Day 91

Sex: Female Day: 91 Relative to Start Date

| High Dose | Heart/BWt | Heart/BrWt | Kidneys | Kidneys/BWt | Kidneys/BrWt | Liver  | Liver/BWt |
|-----------|-----------|------------|---------|-------------|--------------|--------|-----------|
|           | (%)       | (ratio)    | (g)     | (%)         | (ratio)      | (g)    | (%)       |
| 4501      | 0.4339    | 0.5915     | 2.287   | 0.7674      | 1.0462       | 10.286 | 3.4517    |
| 4502      | 0.4100    | 0.7085     | 2.405   | 0.7310      | 1.2631       | 12.587 | 3.8258    |
| 4503      | 0.4236    | 0.6117     | 2.167   | 0.7851      | 1.1340       | 9.487  | 3.4373    |
| 4504      | 0.3959    | 0.6711     | 2.238   | 0.6994      | 1.1854       | 8.810  | 2.7531    |
| 4505      | 0.3470    | 0.5101     | 1.969   | 0.6909      | 1.0155       | 10.193 | 3.5765    |

2759-001  
 A Single Dose Toxicity Study of Test Article Administered by Intrathecal Injection in Rats

Individual Organ Weight Values  
 Day 91

Sex: Female Day: 91 Relative to Start Date

| High Dose | Liver/BrWt | Lung  | Lung/BWt | Lung/BrWt | Ovaries | Ovaries/BWt | Ovaries/BrWt |
|-----------|------------|-------|----------|-----------|---------|-------------|--------------|
|           | (ratio)    | (g)   | (%)      | (ratio)   | (g)     | (%)         | (ratio)      |
| 4501      | 4.7054     | 1.350 | 0.4530   | 0.6176    | 0.101   | 0.0339      | 0.0462       |
| 4502      | 6.6108     | 1.467 | 0.4459   | 0.7705    | 0.095   | 0.0289      | 0.0499       |
| 4503      | 4.9644     | 1.569 | 0.5685   | 0.8210    | 0.102   | 0.0370      | 0.0534       |
| 4504      | 4.6663     | 1.339 | 0.4184   | 0.7092    | 0.105   | 0.0328      | 0.0556       |
| 4505      | 5.2568     | 1.766 | 0.6196   | 0.9108    | 0.101   | 0.0354      | 0.0521       |

2759-001  
 A Single Dose Toxicity Study of Test Article Administered by Intrathecal Injection in Rats

Individual Organ Weight Values  
 Day 91

Sex: Female Day: 91 Relative to Start Date

| High Dose | Oviducts | Oviducts/BWt | Oviducts/<br>BrWt | Pituitary<br>(fixed) | Pituitary<br>(fixed)/BWt | Pituitary<br>(fixed)/BrWt | Sal, mand/<br>sub., rt |
|-----------|----------|--------------|-------------------|----------------------|--------------------------|---------------------------|------------------------|
|           | (g)      | (%)          | (ratio)           | (g)                  | (%)                      | (ratio)                   | (g)                    |
| 4501      | 0.036    | 0.0121       | 0.0165            | 0.0239               | 0.0080                   | 0.0109                    | 0.182                  |
| 4502      | 0.034    | 0.0103       | 0.0179            | 0.0268               | 0.0081                   | 0.0141                    | 0.232                  |
| 4503      | 0.040    | 0.0145       | 0.0209            | 0.0269               | 0.0097                   | 0.0141                    | 0.215                  |
| 4504      | 0.016    | 0.0050       | 0.0085            | 0.0243               | 0.0076                   | 0.0129                    | 0.235                  |
| 4505      | 0.041    | 0.0144       | 0.0211            | 0.0223               | 0.0078                   | 0.0115                    | 0.305                  |

2759-001  
 A Single Dose Toxicity Study of Test Article Administered by Intrathecal Injection in Rats

Individual Organ Weight Values  
 Day 91

Sex: Female Day: 91 Relative to Start Date

| High Dose | Sal gl mand/<br>sub., rt/BWt<br>(%) | Sal gl mand/<br>sub.,rt/BrWt<br>(ratio) | Spleen<br>(g) | Spleen/BWt<br>(%) | Spleen/BrWt<br>(ratio) | Thymus<br>(g) | Thymus/BWt<br>(%) |
|-----------|-------------------------------------|-----------------------------------------|---------------|-------------------|------------------------|---------------|-------------------|
|           | 4501                                | 0.0611                                  | 0.0833        | 0.595             | 0.1997                 | 0.2722        | 0.271             |
| 4502      | 0.0705                              | 0.1218                                  | 0.705         | 0.2143            | 0.3703                 | 0.404         | 0.1228            |
| 4503      | 0.0779                              | 0.1125                                  | 0.522         | 0.1891            | 0.2732                 | 0.204         | 0.0739            |
| 4504      | 0.0734                              | 0.1245                                  | 0.699         | 0.2184            | 0.3702                 | 0.427         | 0.1334            |
| 4505      | 0.1070                              | 0.1573                                  | 0.695         | 0.2439            | 0.3584                 | 0.317         | 0.1112            |

2759-001  
 A Single Dose Toxicity Study of Test Article Administered by Intrathecal Injection in Rats

Individual Organ Weight Values  
 Day 91

Sex: Female Day: 91 Relative to Start Date

| High Dose | Thymus/BrWt | Thyroid/para   | Thyroid/para       | Thyroid/para            | Uterus w/     | Uterus w/         | Uterus w/              |
|-----------|-------------|----------------|--------------------|-------------------------|---------------|-------------------|------------------------|
|           | (ratio)     | (fixed)<br>(g) | (fixed)/BWt<br>(%) | (fixed)/BrWt<br>(ratio) | cervix<br>(g) | cervix/BWt<br>(%) | cervix/BrWt<br>(ratio) |
| 4501      | 0.1240      | 0.0233         | 0.0078             | 0.0107                  | 0.599         | 0.2010            | 0.2740                 |
| 4502      | 0.2122      | 0.0258         | 0.0078             | 0.0136                  | 0.646         | 0.1964            | 0.3393                 |
| 4503      | 0.1068      | 0.0251         | 0.0091             | 0.0131                  | 0.605         | 0.2192            | 0.3166                 |
| 4504      | 0.2262      | 0.0318         | 0.0099             | 0.0168                  | 0.790         | 0.2469            | 0.4184                 |
| 4505      | 0.1635      | 0.0268         | 0.0094             | 0.0138                  | 0.583         | 0.2046            | 0.3007                 |

**Appendix 5**  
**Individual Animal Data Macroscopic and Microscopic Pathology Findings (Day 8)**

2759-001 - Individual Animal Data Record: Pathology, Day 8

---

Animal: 1006

Sex: Male

Dose: Vehicle

Study Day (Week) of Death: 8 (2)

---

**Gross Pathology Observations [Correlation]:**

No observations found

Any remaining protocol required tissues, which have been examined, have no visible lesions

**Gross Pathology - The following Tissues were Not Examined:**

None

**Histopathology Animal Details:**

No animal details found

**Histopathology Observations [Correlation]:**

liver : infiltration, mononuclear cell; multifocal, minimal

Any remaining protocol required tissues, which have been examined, have no visible lesions

**Histopathology - The following Tissues were Not Examined:**

None



2759-001 - Individual Animal Data Record: Pathology, Day 8

---

Animal: 1007

Sex: Male

Dose: Vehicle

Study Day (Week) of Death: 8 (2)

---

**Gross Pathology Observations [Correlation]:**

No observations found

Any remaining protocol required tissues, which have been examined, have no visible lesions

**Gross Pathology - The following Tissues were Not Examined:**

None

**Histopathology Animal Details:**

No animal details found

**Histopathology Observations [Correlation]:**

lung : hemorrhage; multifocal, minimal

Any remaining protocol required tissues, which have been examined, have no visible lesions

**Histopathology - The following Tissues were Not Examined:**

thymus - Not In Plane Of Section

2759-001 - Individual Animal Data Record: Pathology, Day 8

---

Animal: 1008

Sex: Male

Dose: Vehicle

Study Day (Week) of Death: 8 (2)

---

**Gross Pathology Observations [Correlation]:**

No observations found

Any remaining protocol required tissues, which have been examined, have no visible lesions

**Gross Pathology - The following Tissues were Not Examined:**

None

**Histopathology Animal Details:**

No animal details found

**Histopathology Observations [Correlation]:**

kidneys : infiltration, mononuclear cell; multifocal, minimal

Any remaining protocol required tissues, which have been examined, have no visible lesions

**Histopathology - The following Tissues were Not Examined:**

None

2759-001 - Individual Animal Data Record: Pathology, Day 8

---

Animal: 1009

Sex: Male

Dose: Vehicle

Study Day (Week) of Death: 8 (2)

---

**Gross Pathology Observations [Correlation]:**

No observations found

Any remaining protocol required tissues, which have been examined, have no visible lesions

**Gross Pathology - The following Tissues were Not Examined:**

None

**Histopathology Animal Details:**

No animal details found

**Histopathology Observations [Correlation]:**

dorsal root ganglia, lumbar, left : infiltration, mononuclear cell, perivascular; focal, minimal

Any remaining protocol required tissues, which have been examined, have no visible lesions

**Histopathology - The following Tissues were Not Examined:**

None

2759-001 - Individual Animal Data Record: Pathology, Day 8

---

Animal: 1010

Sex: Male

Dose: Vehicle

Study Day (Week) of Death: 8 (2)

---

**Gross Pathology Observations [Correlation]:**

No observations found

Any remaining protocol required tissues, which have been examined, have no visible lesions

**Gross Pathology - The following Tissues were Not Examined:**

None

**Histopathology Animal Details:**

No animal details found

**Histopathology Observations [Correlation]:**

No observations found

Any remaining protocol required tissues, which have been examined, have no visible lesions

**Histopathology - The following Tissues were Not Examined:**

None

2759-001 - Individual Animal Data Record: Pathology, Day 8

Animal: 1506

Sex: Female

Dose: Vehicle

Study Day (Week) of Death: 8 (2)

**Gross Pathology Observations [Correlation]:**

No observations found

Any remaining protocol required tissues, which have been examined, have no visible lesions

**Gross Pathology - The following Tissues were Not Examined:**

None

**Histopathology Animal Details:**

No animal details found

**Histopathology Observations [Correlation]:**

liver : infiltration, mononuclear cell; multifocal, minimal

Any remaining protocol required tissues, which have been examined, have no visible lesions

**Histopathology - The following Tissues were Not Examined:**

dorsal root ganglia, lumbar, left - Not In Plane Of Section

2759-001 - Individual Animal Data Record: Pathology, Day 8

---

Animal: 1507

Sex: Female

Dose: Vehicle

Study Day (Week) of Death: 8 (2)

---

**Gross Pathology Observations [Correlation]:**

No observations found

Any remaining protocol required tissues, which have been examined, have no visible lesions

**Gross Pathology - The following Tissues were Not Examined:**

None

**Histopathology Animal Details:**

No animal details found

**Histopathology Observations [Correlation]:**

dorsal root ganglia lumbar, right : infiltration, mononuclear cell, perivascular; focal, minimal

kidneys : mineralization; multifocal, minimal

liver : infiltration, mononuclear cell; multifocal, minimal

lung : infiltration, mononuclear cell; focal, minimal

Any remaining protocol required tissues, which have been examined, have no visible lesions

**Histopathology - The following Tissues were Not Examined:**

None

2759-001 - Individual Animal Data Record: Pathology, Day 8

---

Animal: 1508

Sex: Female

Dose: Vehicle

Study Day (Week) of Death: 8 (2)

---

**Gross Pathology Observations [Correlation]:**

No observations found

Any remaining protocol required tissues, which have been examined, have no visible lesions

**Gross Pathology - The following Tissues were Not Examined:**

None

**Histopathology Animal Details:**

No animal details found

**Histopathology Observations [Correlation]:**

liver : infiltration, mononuclear cell; multifocal, minimal

Any remaining protocol required tissues, which have been examined, have no visible lesions

**Histopathology - The following Tissues were Not Examined:**

None

2759-001 - Individual Animal Data Record: Pathology, Day 8

---

Animal: 1509

Sex: Female

Dose: Vehicle

Study Day (Week) of Death: 8 (2)

---

**Gross Pathology Observations [Correlation]:**

No observations found

Any remaining protocol required tissues, which have been examined, have no visible lesions

**Gross Pathology - The following Tissues were Not Examined:**

None

**Histopathology Animal Details:**

No animal details found

**Histopathology Observations [Correlation]:**

kidneys : mineralization; focal, minimal

lung : macrophages, alveolar; focal, minimal

spleen : hyperplasia, lymphoid, follicular; multifocal, minimal

Any remaining protocol required tissues, which have been examined, have no visible lesions

**Histopathology - The following Tissues were Not Examined:**

None



2759-001 - Individual Animal Data Record: Pathology, Day 8

---

Animal: 1510

Sex: Female

Dose: Vehicle

Study Day (Week) of Death: 8 (2)

---

**Gross Pathology Observations [Correlation]:**

No observations found

Any remaining protocol required tissues, which have been examined, have no visible lesions

**Gross Pathology - The following Tissues were Not Examined:**

None

**Histopathology Animal Details:**

No animal details found

**Histopathology Observations [Correlation]:**

kidneys : infiltration, mononuclear cell; focal, minimal

spleen : hyperplasia, lymphoid, follicular; multifocal, minimal

Any remaining protocol required tissues, which have been examined, have no visible lesions

**Histopathology - The following Tissues were Not Examined:**

None

2759-001 - Individual Animal Data Record: Pathology, Day 8

---

Animal: 2006

Sex: Male

Dose: Low Dose

Study Day (Week) of Death: 8 (2)

---

**Gross Pathology Observations [Correlation]:**

No observations found

Any remaining protocol required tissues, which have been examined, have no visible lesions

**Gross Pathology - The following Tissues were Not Examined:**

None

**Histopathology Animal Details:**

No animal details found

**Histopathology Observations [Correlation]:**

kidneys : mineralization; multifocal, minimal

lung : infiltration, mononuclear cell; minimal

thymus : hemorrhage; focal, minimal

Any remaining protocol required tissues, which have been examined, have no visible lesions

**Histopathology - The following Tissues were Not Examined:**

None

2759-001 - Individual Animal Data Record: Pathology, Day 8

---

Animal: 2007

Sex: Male

Dose: Low Dose

Study Day (Week) of Death: 8 (2)

---

**Gross Pathology Observations [Correlation]:**

No observations found

Any remaining protocol required tissues, which have been examined, have no visible lesions

**Gross Pathology - The following Tissues were Not Examined:**

None

**Histopathology Animal Details:**

No animal details found

**Histopathology Observations [Correlation]:**

liver : infiltration, mononuclear cell; focal, minimal

lung : infiltration, mononuclear cell; focal, minimal

Any remaining protocol required tissues, which have been examined, have no visible lesions

**Histopathology - The following Tissues were Not Examined:**

None

2759-001 - Individual Animal Data Record: Pathology, Day 8

---

Animal: 2008

Sex: Male

Dose: Low Dose

Study Day (Week) of Death: 8 (2)

---

**Gross Pathology Observations [Correlation]:**

No observations found

Any remaining protocol required tissues, which have been examined, have no visible lesions

**Gross Pathology - The following Tissues were Not Examined:**

None

**Histopathology Animal Details:**

No animal details found

**Histopathology Observations [Correlation]:**

kidneys : infiltration, mononuclear cell; focal, minimal

lung : infiltration, mononuclear cell; multifocal, minimal

Any remaining protocol required tissues, which have been examined, have no visible lesions

**Histopathology - The following Tissues were Not Examined:**

lymph node, mandibular - Not In Plane Of Section

2759-001 - Individual Animal Data Record: Pathology, Day 8

---

Animal: 2009

Sex: Male

Dose: Low Dose

Study Day (Week) of Death: 8 (2)

---

**Gross Pathology Observations [Correlation]:**

No observations found

Any remaining protocol required tissues, which have been examined, have no visible lesions

**Gross Pathology - The following Tissues were Not Examined:**

None

**Histopathology Animal Details:**

No animal details found

**Histopathology Observations [Correlation]:**

liver : infiltration, mononuclear cell; multifocal, minimal

Any remaining protocol required tissues, which have been examined, have no visible lesions

**Histopathology - The following Tissues were Not Examined:**

None

2759-001 - Individual Animal Data Record: Pathology, Day 8

---

Animal: 2010

Sex: Male

Dose: Low Dose

Study Day (Week) of Death: 8 (2)

---

**Gross Pathology Observations [Correlation]:**

No observations found

Any remaining protocol required tissues, which have been examined, have no visible lesions

**Gross Pathology - The following Tissues were Not Examined:**

None

**Histopathology Animal Details:**

No animal details found

**Histopathology Observations [Correlation]:**

dorsal root ganglia, lumbar, left : infiltration, mononuclear cell, perivascular; multifocal, minimal

Any remaining protocol required tissues, which have been examined, have no visible lesions

**Histopathology - The following Tissues were Not Examined:**

None

2759-001 - Individual Animal Data Record: Pathology, Day 8

---

Animal: 2506

Sex: Female

Dose: Low Dose

Study Day (Week) of Death: 8 (2)

---

**Gross Pathology Observations [Correlation]:**

No observations found

Any remaining protocol required tissues, which have been examined, have no visible lesions

**Gross Pathology - The following Tissues were Not Examined:**

None

**Histopathology Animal Details:**

No animal details found

**Histopathology Observations [Correlation]:**

lung : infiltration, mononuclear cell; multifocal, minimal

Any remaining protocol required tissues, which have been examined, have no visible lesions

**Histopathology - The following Tissues were Not Examined:**

dorsal root ganglia, thoracic, left - Not In Plane Of Section

2759-001 - Individual Animal Data Record: Pathology, Day 8

---

Animal: 2507

Sex: Female

Dose: Low Dose

Study Day (Week) of Death: 8 (2)

---

**Gross Pathology Observations [Correlation]:**

No observations found

Any remaining protocol required tissues, which have been examined, have no visible lesions

**Gross Pathology - The following Tissues were Not Examined:**

None

**Histopathology Animal Details:**

No animal details found

**Histopathology Observations [Correlation]:**

liver : infiltration, mononuclear cell; multifocal, minimal

lung : infiltration, mononuclear cell; focal, minimal

thymus : hemorrhage; multifocal, minimal

dorsal root ganglia, lumbar, left : infiltration, mononuclear cell, perivascular; focal, minimal

Any remaining protocol required tissues, which have been examined, have no visible lesions

**Histopathology - The following Tissues were Not Examined:**

dorsal root ganglia, thoracic, right - Not In Plane Of Section



2759-001 - Individual Animal Data Record: Pathology, Day 8

---

Animal: 2508

Sex: Female

Dose: Low Dose

Study Day (Week) of Death: 8 (2)

---

**Gross Pathology Observations [Correlation]:**

No observations found

Any remaining protocol required tissues, which have been examined, have no visible lesions

**Gross Pathology - The following Tissues were Not Examined:**

None

**Histopathology Animal Details:**

No animal details found

**Histopathology Observations [Correlation]:**

thymus : hemorrhage; multifocal, minimal

Any remaining protocol required tissues, which have been examined, have no visible lesions

**Histopathology - The following Tissues were Not Examined:**

dorsal root ganglia, thoracic, left - Not In Plane Of Section

2759-001 - Individual Animal Data Record: Pathology, Day 8

---

Animal: 2509

Sex: Female

Dose: Low Dose

Study Day (Week) of Death: 8 (2)

---

**Gross Pathology Observations [Correlation]:**

No observations found

Any remaining protocol required tissues, which have been examined, have no visible lesions

**Gross Pathology - The following Tissues were Not Examined:**

None

**Histopathology Animal Details:**

No animal details found

**Histopathology Observations [Correlation]:**

lung : infiltration, mononuclear cell; focal, minimal

thymus : hemorrhage; multifocal, minimal

Any remaining protocol required tissues, which have been examined, have no visible lesions

**Histopathology - The following Tissues were Not Examined:**

None

2759-001 - Individual Animal Data Record: Pathology, Day 8

Animal: 2510

Sex: Female

Dose: Low Dose

Study Day (Week) of Death: 8 (2)

**Gross Pathology Observations [Correlation]:**

No observations found

Any remaining protocol required tissues, which have been examined, have no visible lesions

**Gross Pathology - The following Tissues were Not Examined:**

None

**Histopathology Animal Details:**

No animal details found

**Histopathology Observations [Correlation]:**

dorsal root ganglia lumbar, right : infiltration, mononuclear cell, perivascular; focal, minimal

liver : infiltration, mononuclear cell; focal, minimal

Any remaining protocol required tissues, which have been examined, have no visible lesions

**Histopathology - The following Tissues were Not Examined:**

None

2759-001 - Individual Animal Data Record: Pathology, Day 8

---

Animal: 3006

Sex: Male

Dose: Mid Dose

Study Day (Week) of Death: 8 (2)

---

**Gross Pathology Observations [Correlation]:**

No observations found

Any remaining protocol required tissues, which have been examined, have no visible lesions

**Gross Pathology - The following Tissues were Not Examined:**

None

**Histopathology Animal Details:**

No animal details found

**Histopathology Observations [Correlation]:**

liver : hemorrhage; multifocal, minimal

lung : infiltration, mononuclear cell; multifocal, minimal

Any remaining protocol required tissues, which have been examined, have no visible lesions

**Histopathology - The following Tissues were Not Examined:**

None

2759-001 - Individual Animal Data Record: Pathology, Day 8

---

Animal: 3007

Sex: Male

Dose: Mid Dose

Study Day (Week) of Death: 8 (2)

---

**Gross Pathology Observations [Correlation]:**

No observations found

Any remaining protocol required tissues, which have been examined, have no visible lesions

**Gross Pathology - The following Tissues were Not Examined:**

None

**Histopathology Animal Details:**

No animal details found

**Histopathology Observations [Correlation]:**

kidneys : mineralization; multifocal, minimal

liver : infiltration, mononuclear cell; multifocal, minimal

lung : infiltration, mononuclear cell; focal, minimal

Any remaining protocol required tissues, which have been examined, have no visible lesions

**Histopathology - The following Tissues were Not Examined:**

None

2759-001 - Individual Animal Data Record: Pathology, Day 8

---

Animal: 3008

Sex: Male

Dose: Mid Dose

Study Day (Week) of Death: 8 (2)

---

**Gross Pathology Observations [Correlation]:**

No observations found

Any remaining protocol required tissues, which have been examined, have no visible lesions

**Gross Pathology - The following Tissues were Not Examined:**

None

**Histopathology Animal Details:**

No animal details found

**Histopathology Observations [Correlation]:**

liver : infiltration, mononuclear cell; multifocal, minimal

lung : infiltration, mixed cell, perivascular; focal, minimal

Any remaining protocol required tissues, which have been examined, have no visible lesions

**Histopathology - The following Tissues were Not Examined:**

None

2759-001 - Individual Animal Data Record: Pathology, Day 8

---

Animal: 3009

Sex: Male

Dose: Mid Dose

Study Day (Week) of Death: 8 (2)

---

**Gross Pathology Observations [Correlation]:**

No observations found

Any remaining protocol required tissues, which have been examined, have no visible lesions

**Gross Pathology - The following Tissues were Not Examined:**

None

**Histopathology Animal Details:**

No animal details found

**Histopathology Observations [Correlation]:**

liver : infiltration, mononuclear cell; multifocal, minimal

lung : infiltration, mononuclear cell; multifocal, minimal

Any remaining protocol required tissues, which have been examined, have no visible lesions

**Histopathology - The following Tissues were Not Examined:**

None

2759-001 - Individual Animal Data Record: Pathology, Day 8

---

Animal: 3010

Sex: Male

Dose: Mid Dose

Study Day (Week) of Death: 8 (2)

---

**Gross Pathology Observations [Correlation]:**

No observations found

Any remaining protocol required tissues, which have been examined, have no visible lesions

**Gross Pathology - The following Tissues were Not Examined:**

None

**Histopathology Animal Details:**

No animal details found

**Histopathology Observations [Correlation]:**

dorsal root ganglia lumbar, right : infiltration, mononuclear cell, perivascular; focal, minimal

liver : infiltration, mononuclear cell; multifocal, minimal

lung : infiltration, mononuclear cell; minimal

thymus : hemorrhage; multifocal, minimal

Any remaining protocol required tissues, which have been examined, have no visible lesions

**Histopathology - The following Tissues were Not Examined:**

None



2759-001 - Individual Animal Data Record: Pathology, Day 8

---

Animal: 3506

Sex: Female

Dose: Mid Dose

Study Day (Week) of Death: 8 (2)

---

**Gross Pathology Observations [Correlation]:**

No observations found

Any remaining protocol required tissues, which have been examined, have no visible lesions

**Gross Pathology - The following Tissues were Not Examined:**

None

**Histopathology Animal Details:**

No animal details found

**Histopathology Observations [Correlation]:**

liver : infiltration, mononuclear cell; focal, minimal

Any remaining protocol required tissues, which have been examined, have no visible lesions

**Histopathology - The following Tissues were Not Examined:**

None

2759-001 - Individual Animal Data Record: Pathology, Day 8

---

Animal: 3507

Sex: Female

Dose: Mid Dose

Study Day (Week) of Death: 8 (2)

---

**Gross Pathology Observations [Correlation]:**

No observations found

Any remaining protocol required tissues, which have been examined, have no visible lesions

**Gross Pathology - The following Tissues were Not Examined:**

None

**Histopathology Animal Details:**

No animal details found

**Histopathology Observations [Correlation]:**

liver : infiltration, mononuclear cell; multifocal, minimal

Any remaining protocol required tissues, which have been examined, have no visible lesions

**Histopathology - The following Tissues were Not Examined:**

None

2759-001 - Individual Animal Data Record: Pathology, Day 8

---

Animal: 3508

Sex: Female

Dose: Mid Dose

Study Day (Week) of Death: 8 (2)

---

**Gross Pathology Observations [Correlation]:**

No observations found

Any remaining protocol required tissues, which have been examined, have no visible lesions

**Gross Pathology - The following Tissues were Not Examined:**

None

**Histopathology Animal Details:**

No animal details found

**Histopathology Observations [Correlation]:**

dorsal root ganglia lumbar, right : infiltration, mononuclear cell, perivascular; focal, minimal  
kidneys : mineralization; focal, minimal

Any remaining protocol required tissues, which have been examined, have no visible lesions

**Histopathology - The following Tissues were Not Examined:**

None

2759-001 - Individual Animal Data Record: Pathology, Day 8

---

Animal: 3509

Sex: Female

Dose: Mid Dose

Study Day (Week) of Death: 8 (2)

---

**Gross Pathology Observations [Correlation]:**

No observations found

Any remaining protocol required tissues, which have been examined, have no visible lesions

**Gross Pathology - The following Tissues were Not Examined:**

None

**Histopathology Animal Details:**

No animal details found

**Histopathology Observations [Correlation]:**

spinal cord, lumbar : gliosis; focal, minimal

spinal cord, lumbar : infiltration, mononuclear cell, perivascular; multifocal, minimal

spinal cord, thoracic : gliosis; multifocal, minimal

spinal cord, thoracic : infiltration, mononuclear cell, perivascular; multifocal, minimal

Any remaining protocol required tissues, which have been examined, have no visible lesions

**Histopathology - The following Tissues were Not Examined:**

None

2759-001 - Individual Animal Data Record: Pathology, Day 8

Animal: 3510

Sex: Female

Dose: Mid Dose

Study Day (Week) of Death: 8 (2)

**Gross Pathology Observations [Correlation]:**

No observations found

Any remaining protocol required tissues, which have been examined, have no visible lesions

**Gross Pathology - The following Tissues were Not Examined:**

None

**Histopathology Animal Details:**

No animal details found

**Histopathology Observations [Correlation]:**

spinal cord, lumbar : gliosis; focal, minimal

spinal cord, lumbar : infiltration, mononuclear cell, perivascular; multifocal, minimal

spleen : hyperplasia, lymphoid, follicular; multifocal, minimal

Any remaining protocol required tissues, which have been examined, have no visible lesions

**Histopathology - The following Tissues were Not Examined:**

None

2759-001 - Individual Animal Data Record: Pathology, Day 8

---

Animal: 4006

Sex: Male

Dose: High Dose

Study Day (Week) of Death: 8 (2)

---

**Gross Pathology Observations [Correlation]:**

No observations found

Any remaining protocol required tissues, which have been examined, have no visible lesions

**Gross Pathology - The following Tissues were Not Examined:**

None

**Histopathology Animal Details:**

No animal details found

**Histopathology Observations [Correlation]:**

dorsal root ganglia, lumbar, left : infiltration, mononuclear cell, perivascular; focal, minimal

Any remaining protocol required tissues, which have been examined, have no visible lesions

**Histopathology - The following Tissues were Not Examined:**

None

2759-001 - Individual Animal Data Record: Pathology, Day 8

---

Animal: 4007

Sex: Male

Dose: High Dose

Study Day (Week) of Death: 8 (2)

---

**Gross Pathology Observations [Correlation]:**

No observations found

Any remaining protocol required tissues, which have been examined, have no visible lesions

**Gross Pathology - The following Tissues were Not Examined:**

None

**Histopathology Animal Details:**

No animal details found

**Histopathology Observations [Correlation]:**

liver : infiltration, mononuclear cell; multifocal, minimal

Any remaining protocol required tissues, which have been examined, have no visible lesions

**Histopathology - The following Tissues were Not Examined:**

None

2759-001 - Individual Animal Data Record: Pathology, Day 8

---

Animal: 4008

Sex: Male

Dose: High Dose

Study Day (Week) of Death: 8 (2)

---

**Gross Pathology Observations [Correlation]:**

No observations found

Any remaining protocol required tissues, which have been examined, have no visible lesions

**Gross Pathology - The following Tissues were Not Examined:**

None

**Histopathology Animal Details:**

No animal details found

**Histopathology Observations [Correlation]:**

No observations found

Any remaining protocol required tissues, which have been examined, have no visible lesions

**Histopathology - The following Tissues were Not Examined:**

None



2759-001 - Individual Animal Data Record: Pathology, Day 8

---

Animal: 4009

Sex: Male

Dose: High Dose

Study Day (Week) of Death: 8 (2)

---

**Gross Pathology Observations [Correlation]:**

No observations found

Any remaining protocol required tissues, which have been examined, have no visible lesions

**Gross Pathology - The following Tissues were Not Examined:**

None

**Histopathology Animal Details:**

No animal details found

**Histopathology Observations [Correlation]:**

heart : cardiomyopathy; focal, minimal

thymus : hemorrhage; multifocal, minimal

Any remaining protocol required tissues, which have been examined, have no visible lesions

**Histopathology - The following Tissues were Not Examined:**

None

2759-001 - Individual Animal Data Record: Pathology, Day 8

---

Animal: 4010

Sex: Male

Dose: High Dose

Study Day (Week) of Death: 8 (2)

---

**Gross Pathology Observations [Correlation]:**

No observations found

Any remaining protocol required tissues, which have been examined, have no visible lesions

**Gross Pathology - The following Tissues were Not Examined:**

None

**Histopathology Animal Details:**

No animal details found

**Histopathology Observations [Correlation]:**

dorsal root ganglia lumbar, right : infiltration, mononuclear cell, perivascular; focal, minimal

liver : infiltration, mononuclear cell; multifocal, minimal

Any remaining protocol required tissues, which have been examined, have no visible lesions

**Histopathology - The following Tissues were Not Examined:**

None

2759-001 - Individual Animal Data Record: Pathology, Day 8

---

Animal: 4506

Sex: Female

Dose: High Dose

Study Day (Week) of Death: 8 (2)

---

**Gross Pathology Observations [Correlation]:**

No observations found

Any remaining protocol required tissues, which have been examined, have no visible lesions

**Gross Pathology - The following Tissues were Not Examined:**

None

**Histopathology Animal Details:**

No animal details found

**Histopathology Observations [Correlation]:**

spleen : depletion, lymphoid, marginal zone; multifocal, minimal

Any remaining protocol required tissues, which have been examined, have no visible lesions

**Histopathology - The following Tissues were Not Examined:**

None

2759-001 - Individual Animal Data Record: Pathology, Day 8

---

Animal: 4507

Sex: Female

Dose: High Dose

Study Day (Week) of Death: 8 (2)

---

**Gross Pathology Observations [Correlation]:**

No observations found

Any remaining protocol required tissues, which have been examined, have no visible lesions

**Gross Pathology - The following Tissues were Not Examined:**

None

**Histopathology Animal Details:**

No animal details found

**Histopathology Observations [Correlation]:**

kidneys : infiltration, mononuclear cell; focal, minimal

lung : infiltration, mononuclear cell; multifocal, minimal

spleen : depletion, lymphoid, marginal zone; multifocal, minimal

Any remaining protocol required tissues, which have been examined, have no visible lesions

**Histopathology - The following Tissues were Not Examined:**

None

2759-001 - Individual Animal Data Record: Pathology, Day 8

---

Animal: 4508

Sex: Female

Dose: High Dose

Study Day (Week) of Death: 8 (2)

---

**Gross Pathology Observations [Correlation]:**

No observations found

Any remaining protocol required tissues, which have been examined, have no visible lesions

**Gross Pathology - The following Tissues were Not Examined:**

None

**Histopathology Animal Details:**

No animal details found

**Histopathology Observations [Correlation]:**

kidneys : mineralization; multifocal, minimal

spleen : depletion, lymphoid, marginal zone; multifocal, mild

Any remaining protocol required tissues, which have been examined, have no visible lesions

**Histopathology - The following Tissues were Not Examined:**

None

2759-001 - Individual Animal Data Record: Pathology, Day 8

Animal: 4509

Sex: Female

Dose: High Dose

Study Day (Week) of Death: 8 (2)

**Gross Pathology Observations [Correlation]:**

No observations found

Any remaining protocol required tissues, which have been examined, have no visible lesions

**Gross Pathology - The following Tissues were Not Examined:**

None

**Histopathology Animal Details:**

No animal details found

**Histopathology Observations [Correlation]:**

spleen : depletion, lymphoid, marginal zone; multifocal, minimal

dorsal root ganglia, lumbar, left : infiltration, mononuclear cell, perivascular; focal, minimal

Any remaining protocol required tissues, which have been examined, have no visible lesions

**Histopathology - The following Tissues were Not Examined:**

dorsal root ganglia, cervical, left - Not In Plane Of Section

2759-001 - Individual Animal Data Record: Pathology, Day 8

---

Animal: 4510

Sex: Female

Dose: High Dose

Study Day (Week) of Death: 8 (2)

---

**Gross Pathology Observations [Correlation]:**

No observations found

Any remaining protocol required tissues, which have been examined, have no visible lesions

**Gross Pathology - The following Tissues were Not Examined:**

None

**Histopathology Animal Details:**

No animal details found

**Histopathology Observations [Correlation]:**

spleen : depletion, lymphoid, marginal zone; multifocal, marked

Any remaining protocol required tissues, which have been examined, have no visible lesions

**Histopathology - The following Tissues were Not Examined:**

None

**Appendix 6**  
**Individual Animal Data Macroscopic and Microscopic Pathology Findings (Day 29)**



---

2759-001 - Individual Animal Data Record: Pathology, Day 29

---

Animal: 1011

Sex: Male

Dose: Vehicle

Study Day (Week) of Death: 29 (5)

---

**Gross Pathology Observations [Correlation]:**

No observations found

Any remaining protocol required tissues, which have been examined, have no visible lesions

**Gross Pathology - The following Tissues were Not Examined:**

None

**Histopathology Animal Details:**

No animal details found

**Histopathology Observations [Correlation]:**

spleen : hyperplasia, lymphoid, follicular; multifocal, minimal : (comment) Presence of follicular organization and activity.

Any remaining protocol required tissues, which have been examined, have no visible lesions

**Histopathology - The following Tissues were Not Examined:**

None

2759-001 - Individual Animal Data Record: Pathology, Day 29

---

Animal: 1012

Sex: Male

Dose: Vehicle

Study Day (Week) of Death: 29 (5)

---

**Gross Pathology Observations [Correlation]:**

liver : focus/foci, red; median lobe : (comment) 0.5 cm in diameter. (TGL)

Any remaining protocol required tissues, which have been examined, have no visible lesions

**Gross Pathology - The following Tissues were Not Examined:**

None

**Histopathology Animal Details:**

No animal details found

**Histopathology Observations [Correlation]:**

liver : congestion; focal, minimal [liver : focus/foci, red; median lobe : (comment) 0.5 cm in diameter. (G)]

lung : hemorrhage; multifocal, mild

spleen : hyperplasia, lymphoid, follicular; multifocal, minimal

Any remaining protocol required tissues, which have been examined, have no visible lesions

**Histopathology - The following Tissues were Not Examined:**

None

---

2759-001 - Individual Animal Data Record: Pathology, Day 29

---

Animal: 1013

Sex: Male

Dose: Vehicle

Study Day (Week) of Death: 29 (5)

---

**Gross Pathology Observations [Correlation]:**

No observations found

Any remaining protocol required tissues, which have been examined, have no visible lesions

**Gross Pathology - The following Tissues were Not Examined:**

None

**Histopathology Animal Details:**

No animal details found

**Histopathology Observations [Correlation]:**

heart : cardiomyopathy; focal, minimal

liver : infiltration, mononuclear cell; multifocal, minimal

lung : infiltration, mononuclear cell; multifocal, minimal

Any remaining protocol required tissues, which have been examined, have no visible lesions

**Histopathology - The following Tissues were Not Examined:**

None

---

2759-001 - Individual Animal Data Record: Pathology, Day 29

---

Animal: 1014

Sex: Male

Dose: Vehicle

Study Day (Week) of Death: 29 (5)

---

**Gross Pathology Observations [Correlation]:**

No observations found

Any remaining protocol required tissues, which have been examined, have no visible lesions

**Gross Pathology - The following Tissues were Not Examined:**

None

**Histopathology Animal Details:**

No animal details found

**Histopathology Observations [Correlation]:**

No observations found

Any remaining protocol required tissues, which have been examined, have no visible lesions

**Histopathology - The following Tissues were Not Examined:**

None

2759-001 - Individual Animal Data Record: Pathology, Day 29

---

Animal: 1015

Sex: Male

Dose: Vehicle

Study Day (Week) of Death: 29 (5)

---

**Gross Pathology Observations [Correlation]:**

No observations found

Any remaining protocol required tissues, which have been examined, have no visible lesions

**Gross Pathology - The following Tissues were Not Examined:**

None

**Histopathology Animal Details:**

No animal details found

**Histopathology Observations [Correlation]:**

lymph node, mesenteric : erythrocytosis/erythrophagocytosis, sinus; multifocal, minimal

spleen : hyperplasia, lymphoid, follicular; multifocal, minimal

Any remaining protocol required tissues, which have been examined, have no visible lesions

**Histopathology - The following Tissues were Not Examined:**

None

---

2759-001 - Individual Animal Data Record: Pathology, Day 29

---

Animal: 1511

Sex: Female

Dose: Vehicle

Study Day (Week) of Death: 29 (5)

---

**Gross Pathology Observations [Correlation]:**

No observations found

Any remaining protocol required tissues, which have been examined, have no visible lesions

**Gross Pathology - The following Tissues were Not Examined:**

None

**Histopathology Animal Details:**

No animal details found

**Histopathology Observations [Correlation]:**

dorsal root ganglia lumbar, right : infiltration, mononuclear cell, perivascular; focal, minimal

liver : infiltration, mononuclear cell; multifocal, minimal

lung : infiltration, mononuclear cell; focal, minimal

spleen : hyperplasia, lymphoid, follicular; multifocal, minimal

thymus : hemorrhage; multifocal, minimal

Any remaining protocol required tissues, which have been examined, have no visible lesions

**Histopathology - The following Tissues were Not Examined:**

None

---

2759-001 - Individual Animal Data Record: Pathology, Day 29

---

Animal: 1512

Sex: Female

Dose: Vehicle

Study Day (Week) of Death: 29 (5)

---

**Gross Pathology Observations [Correlation]:**

No observations found

Any remaining protocol required tissues, which have been examined, have no visible lesions

**Gross Pathology - The following Tissues were Not Examined:**

None

**Histopathology Animal Details:**

No animal details found

**Histopathology Observations [Correlation]:**

liver : infiltration, mononuclear cell; focal, minimal

lung : infiltration, mononuclear cell; focal, minimal

Any remaining protocol required tissues, which have been examined, have no visible lesions

**Histopathology - The following Tissues were Not Examined:**

None

---

2759-001 - Individual Animal Data Record: Pathology, Day 29

---

Animal: 1513

Sex: Female

Dose: Vehicle

Study Day (Week) of Death: 29 (5)

---

**Gross Pathology Observations [Correlation]:**

No observations found

Any remaining protocol required tissues, which have been examined, have no visible lesions

**Gross Pathology - The following Tissues were Not Examined:**

None

**Histopathology Animal Details:**

No animal details found

**Histopathology Observations [Correlation]:**

No observations found

Any remaining protocol required tissues, which have been examined, have no visible lesions

**Histopathology - The following Tissues were Not Examined:**

None



2759-001 - Individual Animal Data Record: Pathology, Day 29

Animal: 1514

Sex: Female

Dose: Vehicle

Study Day (Week) of Death: 29 (5)

**Gross Pathology Observations [Correlation]:**

No observations found

Any remaining protocol required tissues, which have been examined, have no visible lesions

**Gross Pathology - The following Tissues were Not Examined:**

None

**Histopathology Animal Details:**

No animal details found

**Histopathology Observations [Correlation]:**

kidneys : cyst; unilateral, focal, minimal

liver : infiltration, mononuclear cell; focal, minimal

lung : infiltration, mononuclear cell; focal, minimal

Any remaining protocol required tissues, which have been examined, have no visible lesions

**Histopathology - The following Tissues were Not Examined:**

None

---

2759-001 - Individual Animal Data Record: Pathology, Day 29

---

Animal: 1515

Sex: Female

Dose: Vehicle

Study Day (Week) of Death: 29 (5)

---

**Gross Pathology Observations [Correlation]:**

No observations found

Any remaining protocol required tissues, which have been examined, have no visible lesions

**Gross Pathology - The following Tissues were Not Examined:**

None

**Histopathology Animal Details:**

No animal details found

**Histopathology Observations [Correlation]:**

liver : infiltration, mononuclear cell; multifocal, minimal

Any remaining protocol required tissues, which have been examined, have no visible lesions

**Histopathology - The following Tissues were Not Examined:**

None

---

2759-001 - Individual Animal Data Record: Pathology, Day 29

---

Animal: 2011

Sex: Male

Dose: Low Dose

Study Day (Week) of Death: 29 (5)

---

**Gross Pathology Observations [Correlation]:**

No observations found

Any remaining protocol required tissues, which have been examined, have no visible lesions

**Gross Pathology - The following Tissues were Not Examined:**

None

**Histopathology Animal Details:**

No animal details found

**Histopathology Observations [Correlation]:**

liver : infiltration, mononuclear cell; focal, minimal

Any remaining protocol required tissues, which have been examined, have no visible lesions

**Histopathology - The following Tissues were Not Examined:**

None

---

2759-001 - Individual Animal Data Record: Pathology, Day 29

---

Animal: 2012

Sex: Male

Dose: Low Dose

Study Day (Week) of Death: 29 (5)

---

**Gross Pathology Observations [Correlation]:**

No observations found

Any remaining protocol required tissues, which have been examined, have no visible lesions

**Gross Pathology - The following Tissues were Not Examined:**

None

**Histopathology Animal Details:**

No animal details found

**Histopathology Observations [Correlation]:**

dorsal root ganglia lumbar, right : infiltration, mononuclear cell, perivascular; focal, minimal

heart : cardiomyopathy; focal, minimal

liver : infiltration, mononuclear cell; focal, minimal

lung : infiltration, mononuclear cell; focal, minimal

spleen : hyperplasia, lymphoid, follicular; multifocal, minimal

Any remaining protocol required tissues, which have been examined, have no visible lesions

**Histopathology - The following Tissues were Not Examined:**

None

---

2759-001 - Individual Animal Data Record: Pathology, Day 29

---

Animal: 2013

Sex: Male

Dose: Low Dose

Study Day (Week) of Death: 29 (5)

---

**Gross Pathology Observations [Correlation]:**

No observations found

Any remaining protocol required tissues, which have been examined, have no visible lesions

**Gross Pathology - The following Tissues were Not Examined:**

None

**Histopathology Animal Details:**

No animal details found

**Histopathology Observations [Correlation]:**

dorsal root ganglia lumbar, right : infiltration, mononuclear cell, perivascular; focal, mild

heart : cardiomyopathy; focal, minimal

liver : infiltration, mononuclear cell; multifocal, minimal

Any remaining protocol required tissues, which have been examined, have no visible lesions

**Histopathology - The following Tissues were Not Examined:**

None

---

2759-001 - Individual Animal Data Record: Pathology, Day 29

---

Animal: 2014

Sex: Male

Dose: Low Dose

Study Day (Week) of Death: 29 (5)

---

**Gross Pathology Observations [Correlation]:**

No observations found

Any remaining protocol required tissues, which have been examined, have no visible lesions

**Gross Pathology - The following Tissues were Not Examined:**

None

**Histopathology Animal Details:**

No animal details found

**Histopathology Observations [Correlation]:**

liver : infiltration, mononuclear cell; focal, minimal

thymus : hemorrhage; multifocal, minimal

dorsal root ganglia, lumbar, left : infiltration, mononuclear cell, perivascular; focal, minimal

Any remaining protocol required tissues, which have been examined, have no visible lesions

**Histopathology - The following Tissues were Not Examined:**

dorsal root ganglia, thoracic, left - Not In Plane Of Section

---

2759-001 - Individual Animal Data Record: Pathology, Day 29

---

Animal: 2015

Sex: Male

Dose: Low Dose

Study Day (Week) of Death: 29 (5)

---

**Gross Pathology Observations [Correlation]:**

No observations found

Any remaining protocol required tissues, which have been examined, have no visible lesions

**Gross Pathology - The following Tissues were Not Examined:**

None

**Histopathology Animal Details:**

No animal details found

**Histopathology Observations [Correlation]:**

liver : infiltration, mononuclear cell; focal, minimal

lung : infiltration, mononuclear cell; focal, minimal

Any remaining protocol required tissues, which have been examined, have no visible lesions

**Histopathology - The following Tissues were Not Examined:**

None

---

2759-001 - Individual Animal Data Record: Pathology, Day 29

---

Animal: 2511

Sex: Female

Dose: Low Dose

Study Day (Week) of Death: 29 (5)

---

**Gross Pathology Observations [Correlation]:**

No observations found

Any remaining protocol required tissues, which have been examined, have no visible lesions

**Gross Pathology - The following Tissues were Not Examined:**

None

**Histopathology Animal Details:**

No animal details found

**Histopathology Observations [Correlation]:**

liver : infiltration, mononuclear cell; multifocal, minimal

spleen : hyperplasia, lymphoid, follicular; multifocal, minimal

Any remaining protocol required tissues, which have been examined, have no visible lesions

**Histopathology - The following Tissues were Not Examined:**

None



---

2759-001 - Individual Animal Data Record: Pathology, Day 29

---

Animal: 2512

Sex: Female

Dose: Low Dose

Study Day (Week) of Death: 29 (5)

---

**Gross Pathology Observations [Correlation]:**

No observations found

Any remaining protocol required tissues, which have been examined, have no visible lesions

**Gross Pathology - The following Tissues were Not Examined:**

None

**Histopathology Animal Details:**

No animal details found

**Histopathology Observations [Correlation]:**

dorsal root ganglia lumbar, right : infiltration, mononuclear cell, perivascular; focal, minimal

Any remaining protocol required tissues, which have been examined, have no visible lesions

**Histopathology - The following Tissues were Not Examined:**

None

---

2759-001 - Individual Animal Data Record: Pathology, Day 29

---

Animal: 2513

Sex: Female

Dose: Low Dose

Study Day (Week) of Death: 29 (5)

---

**Gross Pathology Observations [Correlation]:**

No observations found

Any remaining protocol required tissues, which have been examined, have no visible lesions

**Gross Pathology - The following Tissues were Not Examined:**

None

**Histopathology Animal Details:**

No animal details found

**Histopathology Observations [Correlation]:**

heart : cardiomyopathy; focal, minimal

kidneys : cast/casts; focal, minimal : (comment) Hyalin cast with hyalin material around it.

kidneys : infiltration, mononuclear cell; focal, minimal

spleen : hyperplasia, lymphoid, follicular; multifocal, minimal

dorsal root ganglia, lumbar, left : infiltration, mononuclear cell, perivascular; focal, minimal

Any remaining protocol required tissues, which have been examined, have no visible lesions

**Histopathology - The following Tissues were Not Examined:**

None

---

2759-001 - Individual Animal Data Record: Pathology, Day 29

---

Animal: 2514

Sex: Female

Dose: Low Dose

Study Day (Week) of Death: 29 (5)

---

**Gross Pathology Observations [Correlation]:**

No observations found

Any remaining protocol required tissues, which have been examined, have no visible lesions

**Gross Pathology - The following Tissues were Not Examined:**

None

**Histopathology Animal Details:**

No animal details found

**Histopathology Observations [Correlation]:**

No observations found

Any remaining protocol required tissues, which have been examined, have no visible lesions

**Histopathology - The following Tissues were Not Examined:**

None

2759-001 - Individual Animal Data Record: Pathology, Day 29

---

Animal: 2515

Sex: Female

Dose: Low Dose

Study Day (Week) of Death: 29 (5)

---

**Gross Pathology Observations [Correlation]:**

No observations found

Any remaining protocol required tissues, which have been examined, have no visible lesions

**Gross Pathology - The following Tissues were Not Examined:**

None

**Histopathology Animal Details:**

No animal details found

**Histopathology Observations [Correlation]:**

No observations found

Any remaining protocol required tissues, which have been examined, have no visible lesions

**Histopathology - The following Tissues were Not Examined:**

None

---

2759-001 - Individual Animal Data Record: Pathology, Day 29

---

Animal: 3011

Sex: Male

Dose: Mid Dose

Study Day (Week) of Death: 29 (5)

---

**Gross Pathology Observations [Correlation]:**

No observations found

Any remaining protocol required tissues, which have been examined, have no visible lesions

**Gross Pathology - The following Tissues were Not Examined:**

None

**Histopathology Animal Details:**

No animal details found

**Histopathology Observations [Correlation]:**

heart : cardiomyopathy; focal, minimal

liver : infiltration, mononuclear cell; focal, minimal

Any remaining protocol required tissues, which have been examined, have no visible lesions

**Histopathology - The following Tissues were Not Examined:**

None

---

2759-001 - Individual Animal Data Record: Pathology, Day 29

---

Animal: 3012

Sex: Male

Dose: Mid Dose

Study Day (Week) of Death: 29 (5)

---

**Gross Pathology Observations [Correlation]:**

No observations found

Any remaining protocol required tissues, which have been examined, have no visible lesions

**Gross Pathology - The following Tissues were Not Examined:**

None

**Histopathology Animal Details:**

No animal details found

**Histopathology Observations [Correlation]:**

heart : cardiomyopathy; focal, minimal

liver : infiltration, mononuclear cell; multifocal, minimal

Any remaining protocol required tissues, which have been examined, have no visible lesions

**Histopathology - The following Tissues were Not Examined:**

None

---

2759-001 - Individual Animal Data Record: Pathology, Day 29

---

Animal: 3013

Sex: Male

Dose: Mid Dose

Study Day (Week) of Death: 29 (5)

---

**Gross Pathology Observations [Correlation]:**

No observations found

Any remaining protocol required tissues, which have been examined, have no visible lesions

**Gross Pathology - The following Tissues were Not Examined:**

None

**Histopathology Animal Details:**

No animal details found

**Histopathology Observations [Correlation]:**

heart : cardiomyopathy; multifocal, minimal

Any remaining protocol required tissues, which have been examined, have no visible lesions

**Histopathology - The following Tissues were Not Examined:**

None

2759-001 - Individual Animal Data Record: Pathology, Day 29

Animal: 3014

Sex: Male

Dose: Mid Dose

Study Day (Week) of Death: 29 (5)

**Gross Pathology Observations [Correlation]:**

No observations found

Any remaining protocol required tissues, which have been examined, have no visible lesions

**Gross Pathology - The following Tissues were Not Examined:**

None

**Histopathology Animal Details:**

No animal details found

**Histopathology Observations [Correlation]:**

dorsal root ganglia lumbar, right : infiltration, mononuclear cell, perivascular; focal, minimal

kidneys : mineralization; multifocal, minimal

lung : infiltration, mononuclear cell; focal, minimal

skeletal muscle, gastrocnemius : degeneration; focal, minimal

spleen : hyperplasia, lymphoid, follicular; multifocal, minimal

dorsal root ganglia, lumbar, left : infiltration, mononuclear cell, perivascular; focal, minimal

Any remaining protocol required tissues, which have been examined, have no visible lesions

**Histopathology - The following Tissues were Not Examined:**

None



2759-001 - Individual Animal Data Record: Pathology, Day 29

---

Animal: 3015

Sex: Male

Dose: Mid Dose

Study Day (Week) of Death: 29 (5)

---

**Gross Pathology Observations [Correlation]:**

No observations found

Any remaining protocol required tissues, which have been examined, have no visible lesions

**Gross Pathology - The following Tissues were Not Examined:**

None

**Histopathology Animal Details:**

No animal details found

**Histopathology Observations [Correlation]:**

heart : cardiomyopathy; focal, minimal

lung : infiltration, mononuclear cell; focal, minimal

spleen : hyperplasia, lymphoid, follicular; multifocal, minimal

Any remaining protocol required tissues, which have been examined, have no visible lesions

**Histopathology - The following Tissues were Not Examined:**

None

---

2759-001 - Individual Animal Data Record: Pathology, Day 29

---

Animal: 3511

Sex: Female

Dose: Mid Dose

Study Day (Week) of Death: 29 (5)

---

**Gross Pathology Observations [Correlation]:**

No observations found

Any remaining protocol required tissues, which have been examined, have no visible lesions

**Gross Pathology - The following Tissues were Not Examined:**

None

**Histopathology Animal Details:**

No animal details found

**Histopathology Observations [Correlation]:**

liver : infiltration, mononuclear cell; multifocal, minimal

Any remaining protocol required tissues, which have been examined, have no visible lesions

**Histopathology - The following Tissues were Not Examined:**

None

2759-001 - Individual Animal Data Record: Pathology, Day 29

---

Animal: 3512

Sex: Female

Dose: Mid Dose

Study Day (Week) of Death: 29 (5)

---

**Gross Pathology Observations [Correlation]:**

No observations found

Any remaining protocol required tissues, which have been examined, have no visible lesions

**Gross Pathology - The following Tissues were Not Examined:**

None

**Histopathology Animal Details:**

No animal details found

**Histopathology Observations [Correlation]:**

spleen : hyperplasia, lymphoid, follicular; multifocal, minimal

Any remaining protocol required tissues, which have been examined, have no visible lesions

**Histopathology - The following Tissues were Not Examined:**

None

2759-001 - Individual Animal Data Record: Pathology, Day 29

---

Animal: 3513

Sex: Female

Dose: Mid Dose

Study Day (Week) of Death: 29 (5)

---

**Gross Pathology Observations [Correlation]:**

No observations found

Any remaining protocol required tissues, which have been examined, have no visible lesions

**Gross Pathology - The following Tissues were Not Examined:**

None

**Histopathology Animal Details:**

No animal details found

**Histopathology Observations [Correlation]:**

skeletal muscle, biceps femoris : degeneration; focal, minimal

spleen : hyperplasia, lymphoid, follicular; multifocal, minimal

Any remaining protocol required tissues, which have been examined, have no visible lesions

**Histopathology - The following Tissues were Not Examined:**

None

---

2759-001 - Individual Animal Data Record: Pathology, Day 29

---

Animal: 3514

Sex: Female

Dose: Mid Dose

Study Day (Week) of Death: 29 (5)

---

**Gross Pathology Observations [Correlation]:**

No observations found

Any remaining protocol required tissues, which have been examined, have no visible lesions

**Gross Pathology - The following Tissues were Not Examined:**

None

**Histopathology Animal Details:**

No animal details found

**Histopathology Observations [Correlation]:**

kidneys : mineralization; multifocal, minimal

dorsal root ganglia, lumbar, left : infiltration, mononuclear cell, perivascular; focal, minimal

Any remaining protocol required tissues, which have been examined, have no visible lesions

**Histopathology - The following Tissues were Not Examined:**

None

---

2759-001 - Individual Animal Data Record: Pathology, Day 29

---

Animal: 3515

Sex: Female

Dose: Mid Dose

Study Day (Week) of Death: 29 (5)

---

**Gross Pathology Observations [Correlation]:**

No observations found

Any remaining protocol required tissues, which have been examined, have no visible lesions

**Gross Pathology - The following Tissues were Not Examined:**

None

**Histopathology Animal Details:**

No animal details found

**Histopathology Observations [Correlation]:**

kidneys : mineralization; multifocal, minimal

liver : infiltration, mononuclear cell; focal, minimal

dorsal root ganglia, lumbar, left : infiltration, mononuclear cell, perivascular; focal, minimal

Any remaining protocol required tissues, which have been examined, have no visible lesions

**Histopathology - The following Tissues were Not Examined:**

None

---

2759-001 - Individual Animal Data Record: Pathology, Day 29

---

Animal: 4011

Sex: Male

Dose: High Dose

Study Day (Week) of Death: 29 (5)

---

**Gross Pathology Observations [Correlation]:**

No observations found

Any remaining protocol required tissues, which have been examined, have no visible lesions

**Gross Pathology - The following Tissues were Not Examined:**

None

**Histopathology Animal Details:**

No animal details found

**Histopathology Observations [Correlation]:**

dorsal root ganglia lumbar, right : infiltration, mononuclear cell, perivascular; focal, minimal

liver : infiltration, mononuclear cell; multifocal, minimal

Any remaining protocol required tissues, which have been examined, have no visible lesions

**Histopathology - The following Tissues were Not Examined:**

None

---

2759-001 - Individual Animal Data Record: Pathology, Day 29

---

Animal: 4012

Sex: Male

Dose: High Dose

Study Day (Week) of Death: 29 (5)

---

**Gross Pathology Observations [Correlation]:**

No observations found

Any remaining protocol required tissues, which have been examined, have no visible lesions

**Gross Pathology - The following Tissues were Not Examined:**

None

**Histopathology Animal Details:**

No animal details found

**Histopathology Observations [Correlation]:**

kidneys : infiltration, mononuclear cell; focal, minimal

thymus : hemorrhage; multifocal, minimal

Any remaining protocol required tissues, which have been examined, have no visible lesions

**Histopathology - The following Tissues were Not Examined:**

None



2759-001 - Individual Animal Data Record: Pathology, Day 29

Animal: 4013

Sex: Male

Dose: High Dose

Study Day (Week) of Death: 29 (5)

**Gross Pathology Observations [Correlation]:**

skin : abrasion/scab; left lateral head; right lateral head (TGL) [Scabbed area, Face (C)]

Any remaining protocol required tissues, which have been examined, have no visible lesions

**Gross Pathology - The following Tissues were Not Examined:**

None

**Histopathology Animal Details:**

No animal details found

**Histopathology Observations [Correlation]:**

liver : infiltration, mononuclear cell; multifocal, minimal

lymph node, mesenteric : infiltration, mast cell; multifocal, minimal

skin : hyperkeratosis; focal, minimal [skin : abrasion/scab; left lateral head; right lateral head (G)]

skin : inflammation; focal, minimal

Any remaining protocol required tissues, which have been examined, have no visible lesions

**Histopathology - The following Tissues were Not Examined:**

None

2759-001 - Individual Animal Data Record: Pathology, Day 29

---

Animal: 4014

Sex: Male

Dose: High Dose

Study Day (Week) of Death: 29 (5)

---

**Gross Pathology Observations [Correlation]:**

No observations found

Any remaining protocol required tissues, which have been examined, have no visible lesions

**Gross Pathology - The following Tissues were Not Examined:**

None

**Histopathology Animal Details:**

No animal details found

**Histopathology Observations [Correlation]:**

kidneys : mineralization; multifocal, minimal

liver : infiltration, mononuclear cell; multifocal, minimal

lung : infiltration, mononuclear cell; multifocal, minimal

spleen : hyperplasia, lymphoid, follicular; multifocal, minimal

thymus : hemorrhage; multifocal, minimal

Any remaining protocol required tissues, which have been examined, have no visible lesions

**Histopathology - The following Tissues were Not Examined:**

None

2759-001 - Individual Animal Data Record: Pathology, Day 29

---

Animal: 4015

Sex: Male

Dose: High Dose

Study Day (Week) of Death: 29 (5)

---

**Gross Pathology Observations [Correlation]:**

No observations found

Any remaining protocol required tissues, which have been examined, have no visible lesions

**Gross Pathology - The following Tissues were Not Examined:**

None

**Histopathology Animal Details:**

No animal details found

**Histopathology Observations [Correlation]:**

dorsal root ganglia lumbar, right : infiltration, mononuclear cell, perivascular; focal, minimal

liver : infiltration, mononuclear cell; multifocal, minimal

spleen : hyperplasia, lymphoid, follicular; multifocal, minimal

dorsal root ganglia, lumbar, left : infiltration, mononuclear cell, perivascular; focal, minimal

Any remaining protocol required tissues, which have been examined, have no visible lesions

**Histopathology - The following Tissues were Not Examined:**

None

---

2759-001 - Individual Animal Data Record: Pathology, Day 29

---

Animal: 4511

Sex: Female

Dose: High Dose

Study Day (Week) of Death: 29 (5)

---

**Gross Pathology Observations [Correlation]:**

No observations found

Any remaining protocol required tissues, which have been examined, have no visible lesions

**Gross Pathology - The following Tissues were Not Examined:**

None

**Histopathology Animal Details:**

No animal details found

**Histopathology Observations [Correlation]:**

heart : cardiomyopathy; focal, minimal

kidneys : mineralization; focal, minimal

spleen : hyperplasia, lymphoid, follicular; multifocal, minimal

Any remaining protocol required tissues, which have been examined, have no visible lesions

**Histopathology - The following Tissues were Not Examined:**

None

---

2759-001 - Individual Animal Data Record: Pathology, Day 29

---

Animal: 4512

Sex: Female

Dose: High Dose

Study Day (Week) of Death: 29 (5)

---

**Gross Pathology Observations [Correlation]:**

No observations found

Any remaining protocol required tissues, which have been examined, have no visible lesions

**Gross Pathology - The following Tissues were Not Examined:**

None

**Histopathology Animal Details:**

No animal details found

**Histopathology Observations [Correlation]:**

dorsal root ganglia lumbar, right : infiltration, mononuclear cell, perivascular; focal, minimal  
heart : infiltration, mononuclear cell; focal, minimal : (comment) Observed in the pericardial fat.  
kidneys : infiltration, mononuclear cell; multifocal, minimal  
spleen : hyperplasia, lymphoid, follicular; multifocal, minimal

Any remaining protocol required tissues, which have been examined, have no visible lesions

**Histopathology - The following Tissues were Not Examined:**

None

---

2759-001 - Individual Animal Data Record: Pathology, Day 29

---

Animal: 4513

Sex: Female

Dose: High Dose

Study Day (Week) of Death: 29 (5)

---

**Gross Pathology Observations [Correlation]:**

No observations found

Any remaining protocol required tissues, which have been examined, have no visible lesions

**Gross Pathology - The following Tissues were Not Examined:**

None

**Histopathology Animal Details:**

No animal details found

**Histopathology Observations [Correlation]:**

kidneys : mineralization; multifocal, minimal

Any remaining protocol required tissues, which have been examined, have no visible lesions

**Histopathology - The following Tissues were Not Examined:**

None

---

2759-001 - Individual Animal Data Record: Pathology, Day 29

---

Animal: 4514

Sex: Female

Dose: High Dose

Study Day (Week) of Death: 29 (5)

---

**Gross Pathology Observations [Correlation]:**

No observations found

Any remaining protocol required tissues, which have been examined, have no visible lesions

**Gross Pathology - The following Tissues were Not Examined:**

None

**Histopathology Animal Details:**

No animal details found

**Histopathology Observations [Correlation]:**

liver : infiltration, mononuclear cell; multifocal, minimal

lung : hemorrhage; focal, minimal

spleen : hyperplasia, lymphoid, follicular; multifocal, minimal

dorsal root ganglia, lumbar, left : infiltration, mononuclear cell, perivascular; focal, minimal

Any remaining protocol required tissues, which have been examined, have no visible lesions

**Histopathology - The following Tissues were Not Examined:**

None

---

2759-001 - Individual Animal Data Record: Pathology, Day 29

---

Animal: 4515

Sex: Female

Dose: High Dose

Study Day (Week) of Death: 29 (5)

---

**Gross Pathology Observations [Correlation]:**

No observations found

Any remaining protocol required tissues, which have been examined, have no visible lesions

**Gross Pathology - The following Tissues were Not Examined:**

None

**Histopathology Animal Details:**

No animal details found

**Histopathology Observations [Correlation]:**

kidneys : mineralization; multifocal, minimal

liver : infiltration, mononuclear cell; multifocal, minimal

skeletal muscle, gastrocnemius : degeneration; focal, minimal

dorsal root ganglia, lumbar, left : infiltration, mononuclear cell, perivascular; focal, minimal

Any remaining protocol required tissues, which have been examined, have no visible lesions

**Histopathology - The following Tissues were Not Examined:**

None



**Appendix 7**  
**Individual Animal Data Macroscopic and Microscopic Pathology Findings (Day 91)**

---

2759-001 - Individual Animal Data Record: Pathology, Day 91

---

Animal: 1001

Sex: Male

Dose: Vehicle

Study Day (Week) of Death: 91 (13)

---

**Gross Pathology Observations [Correlation]:**

No observations found

Any remaining protocol required tissues, which have been examined, have no visible lesions

**Gross Pathology - The following Tissues were Not Examined:**

None

**Histopathology Animal Details:**

No animal details found

**Histopathology Observations [Correlation]:**

No observations found

Any remaining protocol required tissues, which have been examined, have no visible lesions

**Histopathology - The following Tissues were Not Examined:**

None

---

2759-001 - Individual Animal Data Record: Pathology, Day 91

---

Animal: 1002

Sex: Male

Dose: Vehicle

Study Day (Week) of Death: 91 (13)

---

**Gross Pathology Observations [Correlation]:**

No observations found

Any remaining protocol required tissues, which have been examined, have no visible lesions

**Gross Pathology - The following Tissues were Not Examined:**

None

**Histopathology Animal Details:**

No animal details found

**Histopathology Observations [Correlation]:**

heart : cardiomyopathy; multifocal, minimal

liver : infiltration, mononuclear cell; multifocal, minimal

Any remaining protocol required tissues, which have been examined, have no visible lesions

**Histopathology - The following Tissues were Not Examined:**

None

2759-001 - Individual Animal Data Record: Pathology, Day 91

---

Animal: 1003

Sex: Male

Dose: Vehicle

Study Day (Week) of Death: 91 (13)

---

**Gross Pathology Observations [Correlation]:**

No observations found

Any remaining protocol required tissues, which have been examined, have no visible lesions

**Gross Pathology - The following Tissues were Not Examined:**

None

**Histopathology Animal Details:**

No animal details found

**Histopathology Observations [Correlation]:**

liver : infiltration, mononuclear cell; multifocal, minimal

Any remaining protocol required tissues, which have been examined, have no visible lesions

**Histopathology - The following Tissues were Not Examined:**

None

---

2759-001 - Individual Animal Data Record: Pathology, Day 91

---

Animal: 1004

Sex: Male

Dose: Vehicle

Study Day (Week) of Death: 91 (13)

---

**Gross Pathology Observations [Correlation]:**

No observations found

Any remaining protocol required tissues, which have been examined, have no visible lesions

**Gross Pathology - The following Tissues were Not Examined:**

None

**Histopathology Animal Details:**

No animal details found

**Histopathology Observations [Correlation]:**

heart : cardiomyopathy; focal, minimal

liver : infiltration, mononuclear cell; focal, minimal

lung : infiltration, mononuclear cell; focal, minimal

Any remaining protocol required tissues, which have been examined, have no visible lesions

**Histopathology - The following Tissues were Not Examined:**

None

2759-001 - Individual Animal Data Record: Pathology, Day 91

Animal: 1005

Sex: Male

Dose: Vehicle

Study Day (Week) of Death: 91 (13)

**Gross Pathology Observations [Correlation]:**

kidneys : irregular surface; bilateral, approximately 50% affected (TGL)

Any remaining protocol required tissues, which have been examined, have no visible lesions

**Gross Pathology - The following Tissues were Not Examined:**

None

**Histopathology Animal Details:**

No animal details found

**Histopathology Observations [Correlation]:**

kidneys : inflammation, subacute/chronic; unilateral, moderate : (comment) Inflammation composed mainly of mononuclear cells is present in the cortex and expands into the pelvic space. Presence of cell debris, fibrous connective tissues and tubular cast are observed. [kidneys : irregular surface; bilateral, approximately 50% affected (G)]

liver : infiltration, mononuclear cell; multifocal, minimal

lung : infiltration, mononuclear cell; focal, minimal

thymus : hemorrhage; multifocal, minimal

Any remaining protocol required tissues, which have been examined, have no visible lesions

**Histopathology - The following Tissues were Not Examined:**

None

---

2759-001 - Individual Animal Data Record: Pathology, Day 91

---

Animal: 1501

Sex: Female

Dose: Vehicle

Study Day (Week) of Death: 91 (13)

---

**Gross Pathology Observations [Correlation]:**

No observations found

Any remaining protocol required tissues, which have been examined, have no visible lesions

**Gross Pathology - The following Tissues were Not Examined:**

None

**Histopathology Animal Details:**

No animal details found

**Histopathology Observations [Correlation]:**

liver : infiltration, mononuclear cell; focal, minimal

Any remaining protocol required tissues, which have been examined, have no visible lesions

**Histopathology - The following Tissues were Not Examined:**

None

2759-001 - Individual Animal Data Record: Pathology, Day 91

---

Animal: 1502

Sex: Female

Dose: Vehicle

Study Day (Week) of Death: 91 (13)

---

**Gross Pathology Observations [Correlation]:**

No observations found

Any remaining protocol required tissues, which have been examined, have no visible lesions

**Gross Pathology - The following Tissues were Not Examined:**

None

**Histopathology Animal Details:**

No animal details found

**Histopathology Observations [Correlation]:**

liver : infiltration, mononuclear cell; focal, minimal

Any remaining protocol required tissues, which have been examined, have no visible lesions

**Histopathology - The following Tissues were Not Examined:**

None



---

2759-001 - Individual Animal Data Record: Pathology, Day 91

---

Animal: 1503

Sex: Female

Dose: Vehicle

Study Day (Week) of Death: 91 (13)

---

**Gross Pathology Observations [Correlation]:**

No observations found

Any remaining protocol required tissues, which have been examined, have no visible lesions

**Gross Pathology - The following Tissues were Not Examined:**

None

**Histopathology Animal Details:**

No animal details found

**Histopathology Observations [Correlation]:**

kidneys : mineralization; multifocal, minimal

Any remaining protocol required tissues, which have been examined, have no visible lesions

**Histopathology - The following Tissues were Not Examined:**

None

---

2759-001 - Individual Animal Data Record: Pathology, Day 91

---

Animal: 1504

Sex: Female

Dose: Vehicle

Study Day (Week) of Death: 91 (13)

---

**Gross Pathology Observations [Correlation]:**

No observations found

Any remaining protocol required tissues, which have been examined, have no visible lesions

**Gross Pathology - The following Tissues were Not Examined:**

None

**Histopathology Animal Details:**

No animal details found

**Histopathology Observations [Correlation]:**

liver : infiltration, mononuclear cell; multifocal, minimal

lung : infiltration, mononuclear cell; focal, minimal

Any remaining protocol required tissues, which have been examined, have no visible lesions

**Histopathology - The following Tissues were Not Examined:**

None

---

2759-001 - Individual Animal Data Record: Pathology, Day 91

---

Animal: 1505

Sex: Female

Dose: Vehicle

Study Day (Week) of Death: 91 (13)

---

**Gross Pathology Observations [Correlation]:**

No observations found

Any remaining protocol required tissues, which have been examined, have no visible lesions

**Gross Pathology - The following Tissues were Not Examined:**

None

**Histopathology Animal Details:**

No animal details found

**Histopathology Observations [Correlation]:**

liver : infiltration, mononuclear cell; multifocal, minimal

dorsal root ganglia, lumbar, left : infiltration, mononuclear cell, perivascular; focal, minimal

Any remaining protocol required tissues, which have been examined, have no visible lesions

**Histopathology - The following Tissues were Not Examined:**

None

2759-001 - Individual Animal Data Record: Pathology, Day 91

---

Animal: 2001

Sex: Male

Dose: Low Dose

Study Day (Week) of Death: 91 (13)

---

**Gross Pathology Observations [Correlation]:**

No observations found

Any remaining protocol required tissues, which have been examined, have no visible lesions

**Gross Pathology - The following Tissues were Not Examined:**

None

**Histopathology Animal Details:**

No animal details found

**Histopathology Observations [Correlation]:**

heart : fibrosis; focal, minimal

liver : infiltration, mononuclear cell; multifocal, minimal

thymus : hemorrhage; focal, minimal

Any remaining protocol required tissues, which have been examined, have no visible lesions

**Histopathology - The following Tissues were Not Examined:**

None

---

2759-001 - Individual Animal Data Record: Pathology, Day 91

---

Animal: 2002

Sex: Male

Dose: Low Dose

Study Day (Week) of Death: 91 (13)

---

**Gross Pathology Observations [Correlation]:**

No observations found

Any remaining protocol required tissues, which have been examined, have no visible lesions

**Gross Pathology - The following Tissues were Not Examined:**

None

**Histopathology Animal Details:**

No animal details found

**Histopathology Observations [Correlation]:**

heart : cardiomyopathy; multifocal, minimal

liver : infiltration, mononuclear cell; multifocal, minimal

lung : infiltration, mononuclear cell; focal, minimal

Any remaining protocol required tissues, which have been examined, have no visible lesions

**Histopathology - The following Tissues were Not Examined:**

None

2759-001 - Individual Animal Data Record: Pathology, Day 91

---

Animal: 2003

Sex: Male

Dose: Low Dose

Study Day (Week) of Death: 91 (13)

---

**Gross Pathology Observations [Correlation]:**

No observations found

Any remaining protocol required tissues, which have been examined, have no visible lesions

**Gross Pathology - The following Tissues were Not Examined:**

None

**Histopathology Animal Details:**

No animal details found

**Histopathology Observations [Correlation]:**

liver : infiltration, mononuclear cell; multifocal, minimal

spleen : hyperplasia, lymphoid, follicular; multifocal, minimal

thymus : hemorrhage; multifocal, minimal

Any remaining protocol required tissues, which have been examined, have no visible lesions

**Histopathology - The following Tissues were Not Examined:**

None

---

2759-001 - Individual Animal Data Record: Pathology, Day 91

---

Animal: 2004

Sex: Male

Dose: Low Dose

Study Day (Week) of Death: 91 (13)

---

**Gross Pathology Observations [Correlation]:**

No observations found

Any remaining protocol required tissues, which have been examined, have no visible lesions

**Gross Pathology - The following Tissues were Not Examined:**

None

**Histopathology Animal Details:**

No animal details found

**Histopathology Observations [Correlation]:**

heart : cardiomyopathy; focal, minimal

liver : infiltration, mononuclear cell; multifocal, minimal

Any remaining protocol required tissues, which have been examined, have no visible lesions

**Histopathology - The following Tissues were Not Examined:**

None

2759-001 - Individual Animal Data Record: Pathology, Day 91

---

Animal: 2005

Sex: Male

Dose: Low Dose

Study Day (Week) of Death: 91 (13)

---

**Gross Pathology Observations [Correlation]:**

No observations found

Any remaining protocol required tissues, which have been examined, have no visible lesions

**Gross Pathology - The following Tissues were Not Examined:**

None

**Histopathology Animal Details:**

No animal details found

**Histopathology Observations [Correlation]:**

heart : cardiomyopathy; multifocal, minimal

liver : infiltration, mononuclear cell; multifocal, minimal

lung : infiltration, mononuclear cell; multifocal, minimal

thymus : hemorrhage; multifocal, minimal

dorsal root ganglia, lumbar, left : infiltration, mononuclear cell, perivascular; focal, minimal

Any remaining protocol required tissues, which have been examined, have no visible lesions

**Histopathology - The following Tissues were Not Examined:**

None



---

2759-001 - Individual Animal Data Record: Pathology, Day 91

---

Animal: 2501

Sex: Female

Dose: Low Dose

Study Day (Week) of Death: 91 (13)

---

**Gross Pathology Observations [Correlation]:**

No observations found

Any remaining protocol required tissues, which have been examined, have no visible lesions

**Gross Pathology - The following Tissues were Not Examined:**

None

**Histopathology Animal Details:**

No animal details found

**Histopathology Observations [Correlation]:**

spleen : hyperplasia, lymphoid, follicular; multifocal, minimal

Any remaining protocol required tissues, which have been examined, have no visible lesions

**Histopathology - The following Tissues were Not Examined:**

None

---

2759-001 - Individual Animal Data Record: Pathology, Day 91

---

Animal: 2502

Sex: Female

Dose: Low Dose

Study Day (Week) of Death: 91 (13)

---

**Gross Pathology Observations [Correlation]:**

No observations found

Any remaining protocol required tissues, which have been examined, have no visible lesions

**Gross Pathology - The following Tissues were Not Examined:**

None

**Histopathology Animal Details:**

No animal details found

**Histopathology Observations [Correlation]:**

No observations found

Any remaining protocol required tissues, which have been examined, have no visible lesions

**Histopathology - The following Tissues were Not Examined:**

None

---

2759-001 - Individual Animal Data Record: Pathology, Day 91

---

Animal: 2503

Sex: Female

Dose: Low Dose

Study Day (Week) of Death: 91 (13)

---

**Gross Pathology Observations [Correlation]:**

No observations found

Any remaining protocol required tissues, which have been examined, have no visible lesions

**Gross Pathology - The following Tissues were Not Examined:**

None

**Histopathology Animal Details:**

No animal details found

**Histopathology Observations [Correlation]:**

thymus : hemorrhage; multifocal, minimal

Any remaining protocol required tissues, which have been examined, have no visible lesions

**Histopathology - The following Tissues were Not Examined:**

None

---

2759-001 - Individual Animal Data Record: Pathology, Day 91

---

Animal: 2504

Sex: Female

Dose: Low Dose

Study Day (Week) of Death: 91 (13)

---

**Gross Pathology Observations [Correlation]:**

No observations found

Any remaining protocol required tissues, which have been examined, have no visible lesions

**Gross Pathology - The following Tissues were Not Examined:**

None

**Histopathology Animal Details:**

No animal details found

**Histopathology Observations [Correlation]:**

liver : infiltration, mononuclear cell; focal, minimal

Any remaining protocol required tissues, which have been examined, have no visible lesions

**Histopathology - The following Tissues were Not Examined:**

None

2759-001 - Individual Animal Data Record: Pathology, Day 91

---

Animal: 2505

Sex: Female

Dose: Low Dose

Study Day (Week) of Death: 91 (13)

---

**Gross Pathology Observations [Correlation]:**

No observations found

Any remaining protocol required tissues, which have been examined, have no visible lesions

**Gross Pathology - The following Tissues were Not Examined:**

None

**Histopathology Animal Details:**

No animal details found

**Histopathology Observations [Correlation]:**

No observations found

Any remaining protocol required tissues, which have been examined, have no visible lesions

**Histopathology - The following Tissues were Not Examined:**

None

2759-001 - Individual Animal Data Record: Pathology, Day 91

---

Animal: 3001

Sex: Male

Dose: Mid Dose

Study Day (Week) of Death: 91 (13)

---

**Gross Pathology Observations [Correlation]:**

No observations found

Any remaining protocol required tissues, which have been examined, have no visible lesions

**Gross Pathology - The following Tissues were Not Examined:**

None

**Histopathology Animal Details:**

No animal details found

**Histopathology Observations [Correlation]:**

heart : cardiomyopathy; focal, minimal

liver : infiltration, mononuclear cell; multifocal, minimal

Any remaining protocol required tissues, which have been examined, have no visible lesions

**Histopathology - The following Tissues were Not Examined:**

None

---

2759-001 - Individual Animal Data Record: Pathology, Day 91

---

Animal: 3002

Sex: Male

Dose: Mid Dose

Study Day (Week) of Death: 91 (13)

---

**Gross Pathology Observations [Correlation]:**

No observations found

Any remaining protocol required tissues, which have been examined, have no visible lesions

**Gross Pathology - The following Tissues were Not Examined:**

None

**Histopathology Animal Details:**

No animal details found

**Histopathology Observations [Correlation]:**

heart : cardiomyopathy; focal, mild

liver : infiltration, mononuclear cell; multifocal, minimal

lung : infiltration, mononuclear cell; focal, minimal

Any remaining protocol required tissues, which have been examined, have no visible lesions

**Histopathology - The following Tissues were Not Examined:**

None

---

2759-001 - Individual Animal Data Record: Pathology, Day 91

---

Animal: 3003

Sex: Male

Dose: Mid Dose

Study Day (Week) of Death: 91 (13)

---

**Gross Pathology Observations [Correlation]:**

No observations found

Any remaining protocol required tissues, which have been examined, have no visible lesions

**Gross Pathology - The following Tissues were Not Examined:**

None

**Histopathology Animal Details:**

No animal details found

**Histopathology Observations [Correlation]:**

liver : infiltration, mononuclear cell; multifocal, minimal

Any remaining protocol required tissues, which have been examined, have no visible lesions

**Histopathology - The following Tissues were Not Examined:**

None



---

2759-001 - Individual Animal Data Record: Pathology, Day 91

---

Animal: 3004

Sex: Male

Dose: Mid Dose

Study Day (Week) of Death: 91 (13)

---

**Gross Pathology Observations [Correlation]:**

No observations found

Any remaining protocol required tissues, which have been examined, have no visible lesions

**Gross Pathology - The following Tissues were Not Examined:**

None

**Histopathology Animal Details:**

No animal details found

**Histopathology Observations [Correlation]:**

liver : infiltration, mononuclear cell; multifocal, minimal

lung : infiltration, mononuclear cell; focal, minimal

thymus : hemorrhage; multifocal, minimal

Any remaining protocol required tissues, which have been examined, have no visible lesions

**Histopathology - The following Tissues were Not Examined:**

None

---

2759-001 - Individual Animal Data Record: Pathology, Day 91

---

Animal: 3005

Sex: Male

Dose: Mid Dose

Study Day (Week) of Death: 91 (13)

---

**Gross Pathology Observations [Correlation]:**

No observations found

Any remaining protocol required tissues, which have been examined, have no visible lesions

**Gross Pathology - The following Tissues were Not Examined:**

None

**Histopathology Animal Details:**

No animal details found

**Histopathology Observations [Correlation]:**

liver : infiltration, mononuclear cell; multifocal, minimal

Any remaining protocol required tissues, which have been examined, have no visible lesions

**Histopathology - The following Tissues were Not Examined:**

None

---

2759-001 - Individual Animal Data Record: Pathology, Day 91

---

Animal: 3501

Sex: Female

Dose: Mid Dose

Study Day (Week) of Death: 91 (13)

---

**Gross Pathology Observations [Correlation]:**

No observations found

Any remaining protocol required tissues, which have been examined, have no visible lesions

**Gross Pathology - The following Tissues were Not Examined:**

None

**Histopathology Animal Details:**

No animal details found

**Histopathology Observations [Correlation]:**

kidneys : mineralization; multifocal, minimal

liver : infiltration, mononuclear cell; multifocal, minimal

spleen : hyperplasia, lymphoid, follicular; multifocal, minimal

Any remaining protocol required tissues, which have been examined, have no visible lesions

**Histopathology - The following Tissues were Not Examined:**

None

2759-001 - Individual Animal Data Record: Pathology, Day 91

Animal: 3502

Sex: Female

Dose: Mid Dose

Study Day (Week) of Death: 91 (13)

**Gross Pathology Observations [Correlation]:**

No observations found

Any remaining protocol required tissues, which have been examined, have no visible lesions

**Gross Pathology - The following Tissues were Not Examined:**

None

**Histopathology Animal Details:**

No animal details found

**Histopathology Observations [Correlation]:**

kidneys : mineralization; multifocal, minimal

thymus : hemorrhage; multifocal, minimal

Any remaining protocol required tissues, which have been examined, have no visible lesions

**Histopathology - The following Tissues were Not Examined:**

None

---

2759-001 - Individual Animal Data Record: Pathology, Day 91

---

Animal: 3503

Sex: Female

Dose: Mid Dose

Study Day (Week) of Death: 91 (13)

---

**Gross Pathology Observations [Correlation]:**

No observations found

Any remaining protocol required tissues, which have been examined, have no visible lesions

**Gross Pathology - The following Tissues were Not Examined:**

None

**Histopathology Animal Details:**

No animal details found

**Histopathology Observations [Correlation]:**

dorsal root ganglia lumbar, right : infiltration, mononuclear cell, perivascular; focal, minimal

kidneys : infiltration, mononuclear cell; focal, minimal

dorsal root ganglia, lumbar, left : infiltration, mononuclear cell, perivascular; focal, minimal

Any remaining protocol required tissues, which have been examined, have no visible lesions

**Histopathology - The following Tissues were Not Examined:**

None

---

2759-001 - Individual Animal Data Record: Pathology, Day 91

---

Animal: 3504

Sex: Female

Dose: Mid Dose

Study Day (Week) of Death: 91 (13)

---

**Gross Pathology Observations [Correlation]:**

No observations found

Any remaining protocol required tissues, which have been examined, have no visible lesions

**Gross Pathology - The following Tissues were Not Examined:**

None

**Histopathology Animal Details:**

No animal details found

**Histopathology Observations [Correlation]:**

dorsal root ganglia lumbar, right : infiltration, mononuclear cell, perivascular; focal, minimal

kidneys : mineralization; multifocal, minimal

liver : infiltration, mononuclear cell; focal, minimal

dorsal root ganglia, lumbar, left : infiltration, mononuclear cell, perivascular; multifocal, minimal

Any remaining protocol required tissues, which have been examined, have no visible lesions

**Histopathology - The following Tissues were Not Examined:**

None

---

2759-001 - Individual Animal Data Record: Pathology, Day 91

---

Animal: 3505

Sex: Female

Dose: Mid Dose

Study Day (Week) of Death: 91 (13)

---

**Gross Pathology Observations [Correlation]:**

No observations found

Any remaining protocol required tissues, which have been examined, have no visible lesions

**Gross Pathology - The following Tissues were Not Examined:**

None

**Histopathology Animal Details:**

No animal details found

**Histopathology Observations [Correlation]:**

dorsal root ganglia lumbar, right : infiltration, mononuclear cell, perivascular; focal, minimal

Any remaining protocol required tissues, which have been examined, have no visible lesions

**Histopathology - The following Tissues were Not Examined:**

None

---

2759-001 - Individual Animal Data Record: Pathology, Day 91

---

Animal: 4001

Sex: Male

Dose: High Dose

Study Day (Week) of Death: 91 (13)

---

**Gross Pathology Observations [Correlation]:**

No observations found

Any remaining protocol required tissues, which have been examined, have no visible lesions

**Gross Pathology - The following Tissues were Not Examined:**

None

**Histopathology Animal Details:**

No animal details found

**Histopathology Observations [Correlation]:**

liver : infiltration, mononuclear cell; multifocal, minimal

Any remaining protocol required tissues, which have been examined, have no visible lesions

**Histopathology - The following Tissues were Not Examined:**

None



---

2759-001 - Individual Animal Data Record: Pathology, Day 91

---

Animal: 4002

Sex: Male

Dose: High Dose

Study Day (Week) of Death: 91 (13)

---

**Gross Pathology Observations [Correlation]:**

No observations found

Any remaining protocol required tissues, which have been examined, have no visible lesions

**Gross Pathology - The following Tissues were Not Examined:**

None

**Histopathology Animal Details:**

No animal details found

**Histopathology Observations [Correlation]:**

heart : cardiomyopathy; focal, minimal

liver : infiltration, mononuclear cell; multifocal, minimal

Any remaining protocol required tissues, which have been examined, have no visible lesions

**Histopathology - The following Tissues were Not Examined:**

None

---

2759-001 - Individual Animal Data Record: Pathology, Day 91

---

Animal: 4003

Sex: Male

Dose: High Dose

Study Day (Week) of Death: 91 (13)

---

**Gross Pathology Observations [Correlation]:**

No observations found

Any remaining protocol required tissues, which have been examined, have no visible lesions

**Gross Pathology - The following Tissues were Not Examined:**

None

**Histopathology Animal Details:**

No animal details found

**Histopathology Observations [Correlation]:**

heart : cardiomyopathy; focal, minimal

liver : infiltration, mononuclear cell; focal, minimal

lung : infiltration, mononuclear cell; multifocal, minimal

Any remaining protocol required tissues, which have been examined, have no visible lesions

**Histopathology - The following Tissues were Not Examined:**

None

2759-001 - Individual Animal Data Record: Pathology, Day 91

---

Animal: 4004

Sex: Male

Dose: High Dose

Study Day (Week) of Death: 91 (13)

---

**Gross Pathology Observations [Correlation]:**

No observations found

Any remaining protocol required tissues, which have been examined, have no visible lesions

**Gross Pathology - The following Tissues were Not Examined:**

None

**Histopathology Animal Details:**

No animal details found

**Histopathology Observations [Correlation]:**

heart : cardiomyopathy; multifocal, minimal

liver : infiltration, mononuclear cell; multifocal, minimal

Any remaining protocol required tissues, which have been examined, have no visible lesions

**Histopathology - The following Tissues were Not Examined:**

None

---

2759-001 - Individual Animal Data Record: Pathology, Day 91

---

Animal: 4005

Sex: Male

Dose: High Dose

Study Day (Week) of Death: 91 (13)

---

**Gross Pathology Observations [Correlation]:**

No observations found

Any remaining protocol required tissues, which have been examined, have no visible lesions

**Gross Pathology - The following Tissues were Not Examined:**

None

**Histopathology Animal Details:**

No animal details found

**Histopathology Observations [Correlation]:**

skeletal muscle, gastrocnemius : degeneration; focal, minimal

spleen : hyperplasia, lymphoid, follicular; multifocal, minimal

Any remaining protocol required tissues, which have been examined, have no visible lesions

**Histopathology - The following Tissues were Not Examined:**

None

2759-001 - Individual Animal Data Record: Pathology, Day 91

---

Animal: 4501

Sex: Female

Dose: High Dose

Study Day (Week) of Death: 91 (13)

---

**Gross Pathology Observations [Correlation]:**

No observations found

Any remaining protocol required tissues, which have been examined, have no visible lesions

**Gross Pathology - The following Tissues were Not Examined:**

None

**Histopathology Animal Details:**

No animal details found

**Histopathology Observations [Correlation]:**

No observations found

Any remaining protocol required tissues, which have been examined, have no visible lesions

**Histopathology - The following Tissues were Not Examined:**

None

---

2759-001 - Individual Animal Data Record: Pathology, Day 91

---

Animal: 4502

Sex: Female

Dose: High Dose

Study Day (Week) of Death: 91 (13)

---

**Gross Pathology Observations [Correlation]:**

No observations found

Any remaining protocol required tissues, which have been examined, have no visible lesions

**Gross Pathology - The following Tissues were Not Examined:**

None

**Histopathology Animal Details:**

No animal details found

**Histopathology Observations [Correlation]:**

kidneys : mineralization; multifocal, minimal

liver : infiltration, mononuclear cell; multifocal, minimal

lung : macrophages, alveolar; minimal : (comment) Foamy.

Any remaining protocol required tissues, which have been examined, have no visible lesions

**Histopathology - The following Tissues were Not Examined:**

None

---

2759-001 - Individual Animal Data Record: Pathology, Day 91

---

Animal: 4503

Sex: Female

Dose: High Dose

Study Day (Week) of Death: 91 (13)

---

**Gross Pathology Observations [Correlation]:**

No observations found

Any remaining protocol required tissues, which have been examined, have no visible lesions

**Gross Pathology - The following Tissues were Not Examined:**

None

**Histopathology Animal Details:**

No animal details found

**Histopathology Observations [Correlation]:**

liver : infiltration, mononuclear cell; focal, minimal

lung : infiltration, mononuclear cell; focal, minimal

Any remaining protocol required tissues, which have been examined, have no visible lesions

**Histopathology - The following Tissues were Not Examined:**

None

2759-001 - Individual Animal Data Record: Pathology, Day 91

---

Animal: 4504

Sex: Female

Dose: High Dose

Study Day (Week) of Death: 91 (13)

---

**Gross Pathology Observations [Correlation]:**

No observations found

Any remaining protocol required tissues, which have been examined, have no visible lesions

**Gross Pathology - The following Tissues were Not Examined:**

None

**Histopathology Animal Details:**

No animal details found

**Histopathology Observations [Correlation]:**

liver : infiltration, mononuclear cell; focal, minimal

spleen : hyperplasia, lymphoid, follicular; multifocal, minimal

Any remaining protocol required tissues, which have been examined, have no visible lesions

**Histopathology - The following Tissues were Not Examined:**

None



---

2759-001 - Individual Animal Data Record: Pathology, Day 91

---

Animal: 4505

Sex: Female

Dose: High Dose

Study Day (Week) of Death: 91 (13)

---

**Gross Pathology Observations [Correlation]:**

No observations found

Any remaining protocol required tissues, which have been examined, have no visible lesions

**Gross Pathology - The following Tissues were Not Examined:**

None

**Histopathology Animal Details:**

No animal details found

**Histopathology Observations [Correlation]:**

liver : infiltration, mononuclear cell; multifocal, minimal

lung : infiltration, mononuclear cell; focal, minimal

Any remaining protocol required tissues, which have been examined, have no visible lesions

**Histopathology - The following Tissues were Not Examined:**

None

Appendix 11  
Biodistribution Analysis Report

**REPORT**

**Biodistribution Study of AAV9/CLN7 in Normal WT rats**

Work conducted at University of Texas Southwestern Medical Center in the laboratory of Dr. Steven Gray  
Report prepared by Xin Chen, Steven Gray, and Violeta Zaric on 02/07/2020

Personnel and Role

- Xin Chen: DNA preparation, data compilation, and report preparation.
- Steven Gray: Supervisor and report preparation.
- Thomas Dong: DNA preparation.
- Frances Shaffo: DNA preparation.
- Violeta Zaric: qPCR analysis of DNA samples and report preparation.

I certify that, to the best of my knowledge, the information in this report is correct and a true representation of the work carried out.

  
Xin Chen  
Date 2/7/2020

  
Steven Gray  
Date 2/12/2020

  
Frances Shaffo  
Date 2/10/2020

  
Thomas Dong  
Date 02/10/2020

  
Violeta Zaric  
Date 02/12/2020

**Table of Contents**

1. OBJECTIVE ..... 4  
2. ABBREVIATIONS ..... 4  
3. MATERIALS AND METHODS ..... 4  
4. RESULTS AND DISCUSSION ..... 5  
5. CONCLUSIONS ..... 6  
6. REFERENCES ..... 7  
7. APPENDICES ..... 16

**List of Tables and Figures**

Table 1. Experimental Design ..... 5  
Table 2. Raw data vg/rat diploid genome ..... 14  
Figure 1. AAV9/CLN7 biodistribution in normal rats ..... 5

---

## 1. OBJECTIVE

The objective for this study was to characterize the biodistribution pattern of Self-complementary Adeno-Associated Virus serotype 9 (scAAV9)/Jet-hCLN7opt-SV40pA (AAV9/CLN7 in short), following a single lumbar intrathecal (IT) injection in wild-type (WT) CD [Crl:CD(SD)] rats.

## 2. ABBREVIATIONS

|        |                                        |
|--------|----------------------------------------|
| AAV    | Adeno-Associated Virus                 |
| CLN7   | Neuronal ceroid lipofuscinosis-7       |
| DNA    | Deoxyribonucleic acid                  |
| GAN    | Giant axonal neuropathy                |
| IT     | Lumbar intrathecal                     |
| JeT    | Synthetic JeT promoter                 |
| PBS    | Phosphate-buffered saline              |
| qPCR   | Quantitative PCR                       |
| Sc     | Self-complementary                     |
| spA    | Synthetic polyadenylation signal       |
| SV40pA | Simian virus 40 polyadenylation signal |
| vg     | Vector genomes                         |
| WT     | Wild type                              |

## 3. MATERIALS AND METHODS

### 3.1 AAV/CLN7 Vector Production

AAV/CLN7 vector in Phosphate-buffered saline (PBS), 5% Sorbitol, pH 7.4 containing 0.001% F-68 was produced by the Vigene Biosciences, Inc., Rockville, Maryland. The final vector product was prepared at a titer of  $1 \times 10^{14}$  vector genomes (vg) /mL (COA in the appendices).

### 3.2 Animal Studies

Animal study was performed by Charles River Laboratories, Inc. Mattawan MI. Male and female CD rats were randomized into cohorts, with 5 males and 5 females per cohort, and dosed as shown in Table 1. At the initiation of dosing, the animals assigned to study were approximately 8 to 9 weeks old and weighed between 165 g and 328 g. AAV9/CLN7 vector was injected IT once on day 1 in each animal by a qualified laboratory technician, in a volume of 20 or 60  $\mu$ L, and a final dose of  $5 \times 10^{11}$ ,  $2 \times 10^{12}$ , or  $6 \times 10^{12}$  vg/rat. Rats were sacrificed on day 8, 29, or 91, and tissues were collected frozen and sent to Dr. Gray's laboratory on dry ice for DNA purification and qPCR evaluation.

### 3.3 Biodistribution Analysis

Total genomic DNA was purified from tissue samples collected at necropsy day 29, using a Qiagen Qiacube HT. qPCR was used to determine the quantity of the CLN7 transgene per diploid rat genome. Qualification of the qPCR assay, as well as a detailed report of the standard operating procedures and qPCR study findings, is attached in the references.

**Table 1. Experimental Design**

| Group No. | Dose Level (vg/animal) | Dose Concentration (vg/ $\mu$ L) | Dose Volume ( $\mu$ L) | No. of Animals |        |                 |        |                 |        |
|-----------|------------------------|----------------------------------|------------------------|----------------|--------|-----------------|--------|-----------------|--------|
|           |                        |                                  |                        | Necropsy Day 8 |        | Necropsy Day 29 |        | Necropsy Day 91 |        |
|           |                        |                                  |                        | Male           | Female | Male            | Female | Male            | Female |
| 1         | 0                      | 0                                | 60                     | 5              | 5      | 5               | 5      | 5               | 5      |
| 2         | $5 \times 10^{11}$     | $2.5 \times 10^{10}$             | 20                     | 5              | 5      | 5               | 5      | 5               | 5      |
| 3         | $2 \times 10^{12}$     | $1 \times 10^{11}$               | 20                     | 5              | 5      | 5               | 5      | 5               | 5      |
| 4         | $6 \times 10^{12}$     | $1 \times 10^{11}$               | 60                     | 5              | 5      | 5               | 5      | 5               | 5      |

**4. RESULTS AND DISCUSSION**

An IT study was conducted in WT rats with each animal receiving a single injection of AAV9/CLN7 vector at a dose of  $5 \times 10^{11}$ ,  $2 \times 10^{12}$ , or  $6 \times 10^{12}$  vg. Genomic DNA was purified from the samples collected at necropsy day 29. CLN7 vector biodistribution was quantified by qPCR and provided in Figure 1. IT delivery of AAV9/CLN7 vector results in dose dependent increase of CLN7 vector DNA across the central nervous system (brain and spinal cord) and peripheral organs (heart, lung, liver, kidney, ovary, and testes). The CLN7 vector DNA is concentrated closest to the injection site in the spinal cord and detected at lower levels in multiple brain regions. In the peripheral organs, similar high amounts of CLN7 DNA persist in liver and heart and to the less extent in testes, ovary, lung, and kidney. The pattern of CLN7 biodistribution in this study is consistent with that expected from AAV9 and observed in a previous study from Dr. Gray’s laboratory where a similar vector, scAAV9/JeT-hGANopt-spA, was injected IT to WT rats at a dose of  $6.6 \times 10^{11}$  vg per rat (Gray lab, unpublished findings). Collectively, IT delivery of AAV9/CLN7 results in broad CLN7 biodistribution across rat body.

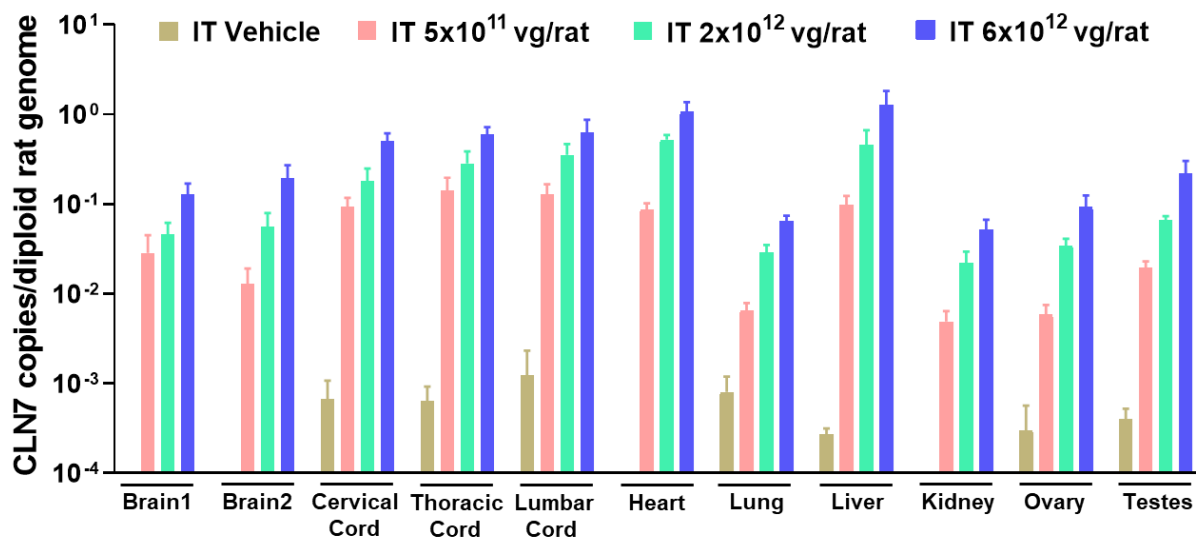

**Figure 1. AAV9/CLN7 biodistribution in normal rats.**

---

*Normal rats received a single IT injection of scAAV9/JeT-hCLN7opt at a dose of  $5 \times 10^{11}$ ,  $2 \times 10^{12}$ , or  $6 \times 10^{12}$  vg/rat. Genomic DNA was purified from the samples collected at necropsy day 29, and CLN7 vector biodistribution across the central nervous and peripheral organs was quantified by qPCR. Results were presented as Mean  $\pm$  SEM.*

## **5. CONCLUSIONS**

The AAV9 vector genome DNA biodistribution pattern should be dependent on the capsid, regardless of the DNA cargo that it carries, which is further supported by the similar pattern of DNA biodistribution from this study using scAAV9/Jet-hCLN7opt-SV40pA as that expected for AAV9, and consistent with a previous similar study using scAAV9/JeT-hGANopt-spA from the Gray laboratory. The exceptions to this would be if an immune response led to viral clearance, or if there was toxicity against the expressed transgene that led to cell death and loss of viral genomes. In this study, the biodistribution pattern of AAV9/CLN7 at multiple doses ( $5 \times 10^{11}$ ,  $2 \times 10^{12}$ , or  $6 \times 10^{12}$  vg/rat) after IT injection in WT rats was determined. It was concluded that AAV9 delivered IT can achieve broad distribution across the nervous system and peripheral organs, although the level of gene transfer in the brain is sub-saturating with a minority of cells receiving the transgene. Thus, this biodistribution study is considered to portray the normal biodistribution pattern expected for an AAV9 vector in rats with vector biodistribution increasing linearly with dose. These results do not suggest any loss of vector due to cellular toxicity.



---

## 6. REFERENCES

### 6.1 Standard Operating Procedure

#### 6.1.1 DNA Extraction of Total DNA from Animal Tissues using the Qiagen Qiacube HT.

*Prepared by Xin Chen and Steven Gray, UTSW Medical Center*

Version: 07-10-2017

#### Overview

Tissue samples are lysed, then automated extraction of total DNA is carried out using a Qiagen Qiacube HT. Special care is taken to avoid cross-contamination of samples. This protocol is based on the Qiagen's protocol to do the DNeasy Kit purification on the Qiagen Qiacube HT, and Qiagen's protocol is followed exactly unless otherwise specified. The DNA is eluted in Buffer EB (10 mM Tris, pH 8.5) rather than Buffer AE, to avoid potential inhibition of downstream PCR applications.

#### Protocol

1. The work area and all pipettes are wiped down with DNA-away solution. Filtered pipette tips are used in all manipulations. Clean gloves and appropriate PPE are worn during sample manipulations.
2. Cut up to 5mg tissue (up to 3mg spleen, about the size of the tissue from ear punched mice) pieces and place in a S-block on dry ice.
3. Make Proteinase K and buffer ATL mix in a ratio of 1:11
  - a. One full S-block = 3 mL Proteinase K + 33 mL ATL buffer (Note: This amount is enough for running the plate once again if needed.)
4. To each tissue sample add:
  - a. 400  $\mu$ L buffer mix for Heart, Liver, Lung, Kidney Spleen, Gonads, Triceps, and Brain; or
  - b. 300  $\mu$ L buffer mix for sciatic, LC, CC, and DRG
5. Cover with TempPlateR EXT Sealing Foil.
6. Place S-block on a preheated Thermomixer at 56°C with shaking 800 rpm overnight.
7. Remove plate from Thermomixer and allow samples to cool to RT.
8. Check the stickiness of the samples especially for spleen, brain, heart, and triceps. Remove the clump if needed to prevent clogging the columns on Qiacube HT.
9. Turn on the instrument and the computer.
10. Launch the Qiacube HT Software.
11. On desktop, select the "DNeasy...V5\_dk\_02202017.QSP" run file from "File" or "Recent" tab.
12. Select the "WIZARD Hat," select number of columns being run, enter lot numbers for Reagent and Plasticware kits (optional), and either click "Next" to go through each of the protocol steps or "Jump to End."
13. Load Adapters and Plasticware:
  - a. Riser Block (Right/Elution side of sink)
  - b. Channeling block holder and adapter (Left/Waste side of sink.)
  - c. Carriage (must be pushed all the way to the LEFT over the LEFT side of the sink.)
  - d. QIAamp 96 plate (taped off if applicable)
  - e. Elution plate (Place on the instrument with the lid and leave on until prompted during pre-run checklist to remove. Plate must be pushed all the way to the LEFT to elute properly.)

- 
- f. Tips (with lids on until prompted during pre-run checklist to remove.)
  - g. To reset number of tips:
    - i. Right click over a tip position.
    - ii. Then select one of the options depending on what you are loading.
14. Load all buffers
    - a. AW1
    - b. 100% Ethanol
    - c. AW2
    - d. EB
    - e. AL/EtOH
  15. Load the S-Block with 220  $\mu$ L of each sample onto deck position B1.
  16. Press “**Play**.”
  17. At the end of the run when doing another run immediately following:
    - a. Remove elution plate and cover with lid (after setting up for next run cap the columns.)
    - b. Remove and discard the QIAamp 96 plate and any empty tip racks.
    - c. Remove only the channeling block adapter (not the holder) from the waste sink and either swap for clean one or clean the one removed using DI water to rinse followed by 70% ethanol and allow to dry before next use.)
  18. Clean the instrument at the end of the day use the “**Waste Pail**.” Running “**UV**” light after is optional.

**Materials:**

- QIAamp 96 DNA QCHT kit (cat no. 51331)
- QCHT plasticware (cat no. 950067)
- DNAaway solution (Molecular BioProducts and Cat #7010)
- Buffer EB (Qiagen, cat #19086)
- TempPlateR EXT Sealing Foil (cat no. 2998-7100)
- S-block (Qiagen, cat # 19585)
- Buffer AL (cat no. 19075)
- 100% Ethanol

**6.1.2 Quantification of hCLN7opt in rat gDNA samples.***Prepared by Violeta Zaric, Xin Chen, and Steven Gray, UTSW Medical Center*Version: **02-06-2020****A. Overview**

This protocol is designed to use quantitative PCR (qPCR) to determine the double-stranded copies of the hCLN7opt DNA present in a purified genomic DNA sample. This SOP has been optimized and validated for use with rat genomic DNA. The total amount of sample DNA (host genomes) is determined by SYBR green qPCR analysis with primers specific to *Rattus norvegicus* lamin B2, and the copies of hCLN7opt DNA within each sample is determined by SYBR green qPCR analysis with primers specific for hCLN7opt.

**B. Quantification of hCLN7 DNA in gDNA sample***1. Make plasmid DNA standards*

Dilute plasmid DNA (pSJG-JeT-hCLN7opt-SV40pA) from Maxi-prep to  $1 \times 10^8$  double-stranded copies/ $\mu\text{L}$  stock in 10 mM Tris-EDTA buffer pH 8 (Invitrogen Cat# 9858) in 1.5 mL siliconized tubes (Fisher Cat# 02681331). Make a first dilution 1:20 to  $1 \times 10^7$  copies following by serial 1:10 dilutions to 10 copies. Make 2 serial 1:2 dilutions from 10 copies to 5 copies, and 4 serial 1:2 dilutions from 100 copies to 6.25 copies as indicated. All dilutions are prepared with 10 mM Tris prepared from 1M Tris pH 8 (Invitrogen Cat# AM9855G) with UltraPure DNase/RNase-free distilled water (Invitrogen Cat# 10977-015). Vortex and spin briefly in every step.

|                                                       |                                                                                          |
|-------------------------------------------------------|------------------------------------------------------------------------------------------|
| $1 \times 10^7$ copies/reaction<br>10 $\mu\text{L}$ ↻ | 10 $\mu\text{L}$ of $10^8$ copies/ $\mu\text{L}$ stock + 190 $\mu\text{L}$ of 10 mM Tris |
| $1 \times 10^6$ copies/reaction<br>10 $\mu\text{L}$ ↻ | + 90 $\mu\text{L}$ of 10 mM Tris                                                         |
| $1 \times 10^5$ copies/reaction<br>10 $\mu\text{L}$ ↻ | + 90 $\mu\text{L}$ of 10 mM Tris                                                         |
| $1 \times 10^4$ copies/reaction<br>10 $\mu\text{L}$ ↻ | + 90 $\mu\text{L}$ of 10 mM Tris                                                         |
| $1 \times 10^3$ copies/reaction<br>10 $\mu\text{L}$ ↻ | + 90 $\mu\text{L}$ of 10 mM Tris                                                         |
| $1 \times 10^2$ copies/reaction<br>10 $\mu\text{L}$ ↻ | + 90 $\mu\text{L}$ of 10 mM Tris                                                         |
| 10 copies/reaction<br>50 $\mu\text{L}$ ↻              | + 90 $\mu\text{L}$ of 10 mM Tris                                                         |
| 5 copies/reaction<br>50 $\mu\text{L}$ ↻               | + 50 $\mu\text{L}$ of 10 mM Tris                                                         |
| 2.5 copies/reaction                                   | + 50 $\mu\text{L}$ of 10 mM Tris                                                         |
| 50 copies/reaction<br>50 $\mu\text{L}$ ↻              | 50 $\mu\text{L}$ of 100 copies + 50 $\mu\text{L}$ of 10 mM Tris                          |
| 25 copies/reaction<br>50 $\mu\text{L}$ ↻              | + 50 $\mu\text{L}$ of 10 mM Tris                                                         |
| 12.5 copies/reaction<br>50 $\mu\text{L}$ ↻            | + 50 $\mu\text{L}$ of 10 mM Tris                                                         |
| 6.25 copies/reaction                                  | + 50 $\mu\text{L}$ of 10 mM Tris                                                         |

---

2. *Prepare the qPCR SYBR master reactions*

1) Set up gDNA samples as follows.

- |                        |                                         |
|------------------------|-----------------------------------------|
| 2× SYBR master mix     | 10 µL (Roche Cat# 04887352001)          |
| Forward Primer (20 µM) | 0.5 µL (ttcctcggcattctgaacat, IDT, Inc) |
| Reverse Primer (20 µM) | 0.5 µL (gtcgatgcttcctcgaagtt, IDT, Inc) |
- a. Pipet 11 µL of master mix into each well intended for gDNA samples.  
b. Add 9 µL of sample gDNA to the well.

2) Set up standard plasmid DNA as follows.

- |                        |                                      |
|------------------------|--------------------------------------|
| 2× SYBR mater mix      | 10 µL (Roche Cat# 04887352001)       |
| Forward Primer (20 µM) | 0.5 µL (ttcctcggcattctgaacat, Sigma) |
| Reverse Primer (20 µM) | 0.5 µL (gtcgatgcttcctcgaagtt, Sigma) |
| H <sub>2</sub> O       | 7 µL (Teknova Cat# W3440)            |
- a. Pipet 18 µL of master mix into each well intended for standard curve samples.  
b. Add 2 µL of plasmid DNA standard to the appropriate well.  
c. Add H<sub>2</sub>O as no template control.  
d. Seal the plate with the seal for qPCR usage. (Roche Cat# 04-729-692-001)  
e. Spin down the plate @ 1800 rpm for 10 sec.  
f. Cycle in the Roche LightCycler480.

### C. Quantification of *Rattus norvegicus* lamin B2

1. *Make genomic DNA standards*

- 1) Measure the rat liver or rat kidney gDNA concentration using the LVis plate with the CLARIOstar plate reader (BMG LABTECH). Adjust the concentration to 60 ng/µL as the highest dilution stock.  
2) Make 6 serial 1:4 dilutions with 10 mM Tris from 60 ng/µL to 0.059 ng/µL.

2. *Preparation of gDNA samples for qPCR run*

- 1) Dilute gDNA 1:10 with 10 mM Tris in a 96-well plate.  
2) Mix samples by pipetting up and down, then spin at 1800 rpm for 10 sec.

3. *Prepare the qPCR SYBR master reactions*

1) Set up standard gDNA and gDNA samples as follows.

- |                        |                                       |
|------------------------|---------------------------------------|
| 2× SYBR mater mix      | 5 µL (Roche Cat# 04887352001)         |
| Forward Primer (20 µM) | 0.25 µL (cctctcgggtacacagtcc, Sigma)  |
| Reverse Primer (20 µM) | 0.25 µL (gggcagcaagtctacaaagc, Sigma) |
| H <sub>2</sub> O       | 2.5 µL (PCR water Teknova Cat# W3440) |
- a. Pipet 8 µL of master mix into each well intended for gDNA samples.  
b. Add 2 µL of gDNA standard or prediluted gDNA samples  
c. Add H<sub>2</sub>O as no template control.  
d. Seal the plate with the seal for qPCR usage. (Roche Cat#04-729-692-001)  
e. Spin down the plate @ 1800 rpm for 10 sec.  
f. Cycle in the Roche LightCycler480.

**D. Running Cycles****hCLN7opt**

|               | Target (°C) | Time (hh:mm:ss) | Cycle | Acquisition Mode | Ramp Rate | Acquisitions     | Detect Mode          |
|---------------|-------------|-----------------|-------|------------------|-----------|------------------|----------------------|
| Denature      | 95          | 0:10:00         | 1     | none             | 4.8       |                  | SyBr green I/HRM Dye |
| Amplification | 95          | 0:00:15         | 55    | none             | 4.8       |                  |                      |
|               | 60          | 0:00:10         |       | none             | 2.5       |                  |                      |
|               | 72          | 0:00:10         |       | single           | 4.8       |                  |                      |
| Melt          | 95          | 0:00:05         | 1     | none             | 4.8       |                  |                      |
|               | 65          | 0:01:00         |       | none             | 2.5       |                  |                      |
|               | 95          |                 |       | continuous       | 0.11      | 5 <sup>0</sup> C |                      |
| Cool          | 40          | 0:00:10         | 1     | none             | 2.5       |                  |                      |

**Rattus norvegicus lamin B2**

|               | Target (°C) | Time (hh:mm:ss) | Cycle | Acquisition Mode | Ramp Rate | Acquisitions     | Detect Mode          |
|---------------|-------------|-----------------|-------|------------------|-----------|------------------|----------------------|
| Denature      | 95          | 0:10:00         | 1     | none             | 4.8       |                  | SyBr green I/HRM Dye |
| Amplification | 95          | 0:00:10         | 45    | none             | 4.8       |                  |                      |
|               | 60          | 0:00:10         |       | none             | 2.5       |                  |                      |
|               | 72          | 0:00:10         |       | single           | 4.8       |                  |                      |
| Melt          | 95          | 0:00:05         | 1     | none             | 4.8       |                  |                      |
|               | 65          | 0:01:00         |       | none             | 2.5       |                  |                      |
|               | 95          |                 |       | continuous       | 0.11      | 5 <sup>0</sup> C |                      |
| Cool          | 40          | 0:00:10         | 1     | none             | 2.5       |                  |                      |

**E. Analysis**

Use Ab Quant/ 2<sup>nd</sup> derivative max in LightCycler 480 v 1.5 software to calculate the number of genomes per sample relative to the plasmid DNA standard curve or the amount of host DNA in ng relative to the rat gDNA standard. Use T<sub>m</sub> calling as a quality control to check whether the specific product was amplified.

Calculation of number of copies of viral genome/μL

$$= \frac{\text{Copy of virus genome as double strand DNA relative to the copy number of plasmid DNA standard}}{2}$$

- Calculation of **genome copies** and amount (μg) of host DNA relative to the ng amount of host DNA standard

This calculation assumes that the average weight of a bp of a double strand DNA is 620 g/mol, thus the molecular weight of DNA of 3 billion bps in a haploid cell is  $1.85 \times 10^{12}$  g/mol. The quantity of DNA in each cell contains  $(1.85 \times 10^{12} \text{ g/mol}) \times (1 \text{ mole}/6.022 \times 10^{23} \text{ molecules}) \times 2 = 6 \text{ pg}$  of diploid DNA, so 1 pg of DNA contains 0.167 double strand copies = 0.334 single-stranded copies of DNA, and 1 ng = 334 single-stranded copies.

$$\text{Number of rat lamin b2 genome copies} = \frac{\text{ng} \times 334 \text{ (single stranded copies=genome)}}{\text{dilution factor} \times 2}$$

Conversion from ng/ $\mu$ L to  $\mu$ g/ $\mu$ L amount of host DNA = ng/ $\mu$ L of host DNA  $\times$  1000

- Calculation of number of copies of Viral genomes normalized to number of copies of genome host

$$= \frac{\text{Copies of viral genome}/\mu\text{L}}{\text{Copies of genome DNA in host}/\mu\text{L}}$$

- Calculation of number of copies of Viral genomes normalized to amount of host DNA host ( $\mu$ g)

$$= \frac{\text{Copies of viral genome}/\mu\text{L}}{\text{amount of DNA in host } (\mu\text{g})/\mu\text{L}}$$

### 6.1.3 Validation studies

#### A. Validation Studies of JeT-hCLN7opt-SV40pA detection in no matrix.

##### Overview

Previous studies validated the use of CLN7opt 3F and 3R primers to detect the CLN7opt DNA with adequate sensitivity and reproducibility, in no matrix, a matrix of mouse genomic DNA, or a matrix of non-human primate genomic DNA. Lower limits of detection (LLOD) and quantification (LLOQ) were defined.

#### B. Validation Studies to Detect pSJG-JeT-hCLN7opt-SV40pA in a rat genomic DNA matrix.

##### Overview

The plasmid, pSJG-JeT-hCLN7opt-SV40pA, was run within a matrix of rat genomic DNA in 5 SYBR reactions using the CLN7opt primer set 3 to validate whether the PCR efficiency and lower detection threshold was maintained within the genomic DNA matrix.

##### Plasmid dilutions in gDNA matrix

The plasmid was diluted from  $1 \times 10^7$  copies to 2.5 copies in all runs, and 2 replicates of serial dilution were used in all 42 independent runs. All of the dilutions were carried out in a matrix of 200 ng rat genomic DNA. 2<sup>nd</sup> derivative max and fit points algorithm were applied on the analysis. As with the plasmid DNA alone amplifications, T<sub>m</sub> analysis was an accurate predictor of product purity visualized by gel electrophoresis. Among these 42 runs, the lower limit of detection (LLOD) was 10 copies of plasmid. 100% of replicates at or above 10 copies were successfully detected. Eight out of 10 replicates amplified 5 starting copies of template, 6 out of 10 replicates amplified 2 copies and 7 out of the 10 replicates amplified 1 copy. The efficiency was between 1.97 to 2 using the 2<sup>nd</sup> derivative max algorithm.

The variability of the LLOQ for detection of the CLN7opt plasmid sequence in the matrix of 200 ng rat genomic DNA was 28 to 76.7 copies detected with an input of 50 copies, 10.3 to 37.9 copies detected at 25 copies level, 8.57 to 27.7 copies at 10 copies, 1.93 to 18.7 at 5 copies, 2.34 to 14.1 copies at 2 copies and 0.0000000146 to 4.56 copies at 1 copy level in SYBR reaction with CLN7opt primer set 1.

##### Results

---

Our qPCR validation studies detected the plasmid pSJG-JeT-hCLN7opt-SV40pA at comparable efficiencies, LLOD, and LLOQ whether plasmid DNA alone was measured, or whether the plasmid DNA was detected in a matrix of rat genomic DNA. Overall, our LLOD was 100% sensitive to detect 10 copies of CLN7opt sequence in 200 ng of rat genomic DNA (50 copies/ug), *which conforms with FDA guidelines on conducting vector genome biodistribution studies*. This plasmid is our production plasmid to make the proposed clinical vector scAAV9/JeT-hCLN7opt. We conclude that these PCR conditions can be used to detect the CLN7opt viral genome in rat genomic DNA samples.

#### **6.1.4 DETECTION OF CLN7opt GENOMIC DNA FROM CRL STUDY 2759-001**

##### *Methods and Scoring Criteria*

DNA was purified from all tissue samples. When possible, 200 ng was used as template in the genomic DNA qPCR reactions but in some cases the DNA concentration was too low and the maximum volume of DNA (<200 ng) was used. The amount of genomic DNA used as template is noted in on the attached excel file. All reactions were run at least in duplicate.

The PCR products were scored as positive only if the T<sub>m</sub> of the final PCR product was correct and if the crossing point (C<sub>p</sub>) was <40 cycles. Any reaction that did not meet these criteria was scored as zero.

##### *Results*

Following the above quality control criteria, in the vehicle-injected gDNA rat samples we had a false positive rate of 0.7% (4/570 samples) to detect hCLN7opt. Some of the vehicle-injection cohorts only had an N=2, which did not negatively impact the study.

##### *Conclusion*

hCLN7opt was dose dependently distributed across the CNS and also to peripheral organs following intrathecal AAV9-mediated gene transfer in rats (see raw data vg/rat diploid genome in Figure 1 below).

**Table 2. Raw data vg/rat diploid genome**

| Rat ID | Brain 1 | Brain 2 | CC     | TC     | LC     | Heart  | Lung   | Liver  | Kidney | Ovary  | Testes |
|--------|---------|---------|--------|--------|--------|--------|--------|--------|--------|--------|--------|
| 1011   | 0.0000  | 0.0000  |        |        |        |        | 0.0017 | 0.0002 | 0.0002 |        | 0.0008 |
| 1012   |         |         | 0.0006 |        |        |        | 0.0000 | 0.0003 | 0.0004 |        | 0.0005 |
| 1013   |         |         |        | 0.0007 |        | 0.0000 | 0.0000 | 0.0004 | 0.0000 |        | 0.0002 |
| 1014   | 0.0000  |         |        |        | 0.0045 | 0.0000 | 0.0000 | 0.0002 | 0.0000 |        | 0.0001 |
| 1015   |         | 0.0000  |        |        |        | 0.0000 | 0.0035 | 0.0001 | 0.0000 |        | 0.0004 |
| 1511   |         |         | 0.0000 |        | 0.0000 | 0.0000 | 0.0001 | 0.0003 | 0.0000 | 0.0011 |        |
| 1512   |         |         |        |        |        | 0.0000 | 0.0002 | 0.0004 | 0.0000 | 0.0001 |        |
| 1513   |         |         |        |        | 0.0002 | 0.0001 |        |        | 0.0000 | 0.0000 |        |
| 1514   |         | 0.0000  | 0.0014 | 0.0011 |        |        | 0.0009 |        | 0.0001 | 0.0000 |        |
| 1515   |         |         |        | 0.0001 | 0.0002 |        | 0.0008 |        |        |        |        |
| 2011   | 0.0097  | 0.0217  | 0.1670 | 0.0653 |        | 0.1782 | 0.0038 | 0.1321 | 0.0050 |        | 0.0142 |
| 2012   | 0.1553  |         | 0.2366 | 0.2349 | 0.1746 | 0.0984 | 0.0070 | 0.0984 | 0.0007 |        | 0.0292 |
| 2013   |         | 0.0049  | 0.0587 | 0.0345 | 0.1110 | 0.0587 | 0.0059 | 0.0235 | 0.0060 |        | 0.0182 |
| 2014   | 0.0415  | 0.0525  | 0.0623 | 0.1649 | 0.3539 | 0.0879 | 0.0070 | 0.0410 | 0.0040 |        |        |
| 2015   | 0.0126  |         | 0.1551 | 0.6029 | 0.1973 | 0.1511 | 0.0036 | 0.0510 | 0.0081 |        | 0.0166 |
| 2511   | 0.0027  | 0.0026  | 0.0224 | 0.0502 | 0.0338 | 0.0398 | 0.0170 | 0.0860 | 0.0017 | 0.0027 |        |
| 2512   | 0.0038  | 0.0111  | 0.0265 | 0.0521 | 0.1695 | 0.0534 | 0.0031 | 0.0461 | 0.0017 | 0.0026 |        |
| 2513   | 0.0029  | 0.0006  | 0.0132 | 0.0149 | 0.0217 | 0.0884 | 0.0031 | 0.1084 | 0.0149 | 0.0054 |        |
| 2514   | 0.0058  | 0.0032  | 0.0676 | 0.1047 | 0.0129 | 0.0419 | 0.0100 | 0.0876 | 0.0021 | 0.0072 |        |
| 2515   | 0.0224  | 0.0073  | 0.1273 | 0.0890 | 0.0918 | 0.0794 | 0.0048 | 0.3037 |        | 0.0114 |        |
| 3011   | 0.0594  | 0.2385  | 0.3331 |        | 0.7081 | 0.5639 | 0.0150 | 0.1902 | 0.0454 |        | 0.0693 |
| 3012   | 0.0168  | 0.0138  | 0.3236 | 0.3436 | 0.4370 | 0.8010 | 0.0166 | 0.1458 | 0.0105 |        | 0.0857 |
| 3013   | 0.0767  | 0.0247  | 0.1180 | 0.3132 | 1.1398 | 0.3669 | 0.0162 | 0.0850 | 0.0069 |        | 0.0537 |
| 3014   | 0.0148  | 0.0154  | 0.0152 | 0.0075 | 0.0175 |        | 0.0356 | 2.0698 |        |        | 0.0555 |
| 3015   | 0.0283  | 0.0470  | 0.1128 | 0.2430 | 0.4509 | 0.2920 | 0.0299 |        |        |        |        |
| 3511   | 0.0194  | 0.0070  | 0.0407 | 0.1538 | 0.0987 | 0.3661 | 0.0254 | 0.1514 | 0.0637 | 0.0270 |        |



---

|      |        |        |        |        |        |        |        |        |        |        |        |
|------|--------|--------|--------|--------|--------|--------|--------|--------|--------|--------|--------|
| 3512 | 0.0173 | 0.0271 | 0.0876 | 0.0577 | 0.1387 | 0.6401 | 0.0807 | 0.4947 | 0.0145 | 0.0480 |        |
| 3513 | 0.0128 | 0.0191 | 0.0213 | 0.0406 | 0.0506 | 0.2889 | 0.0236 | 0.4459 | 0.0063 | 0.0142 |        |
| 3514 | 0.0422 | 0.0339 | 0.0656 | 0.3508 | 0.0703 | 0.5589 | 0.0104 | 0.3413 | 0.0220 | 0.0480 |        |
| 3515 | 0.1727 | 0.1326 | 0.6956 | 1.0400 | 0.4294 | 0.8233 | 0.0328 | 0.2141 | 0.0067 | 0.0355 |        |
| 4011 | 0.3426 | 0.4842 | 0.5845 | 0.6250 | 0.8260 |        | 0.0300 | 0.4326 | 0.1175 |        | 0.2632 |
| 4012 | 0.0413 | 0.1270 | 0.1069 | 0.1337 | 0.1912 | 0.6093 | 0.0667 | 0.5074 | 0.0399 |        | 0.3393 |
| 4013 |        | 0.1016 | 0.0543 | 0.0654 | 0.0910 | 1.2233 | 0.0693 |        |        |        |        |
| 4014 |        | 0.0949 | 0.7902 | 0.6956 | 0.4770 | 0.5964 | 0.0378 |        |        |        |        |
| 4015 | 0.0961 | 0.6850 | 0.4848 | 0.6229 | 0.5169 |        | 0.0742 |        |        |        | 0.0581 |
| 4511 | 0.0322 | 0.0272 | 0.1217 | 0.1480 | 0.0829 | 2.7656 | 0.1125 | 1.0313 | 0.0173 | 0.0562 |        |
| 4512 |        | 0.0708 | 0.4359 | 1.0783 | 0.6622 | 0.4014 | 0.0416 | 0.5291 | 0.0082 | 0.0480 |        |
| 4513 | 0.0950 | 0.0632 | 1.2251 | 1.1929 | 2.3989 | 0.7297 | 0.0259 | 4.6061 | 0.0889 | 0.0371 |        |
| 4514 | 0.1984 | 0.1026 | 0.4554 | 0.8305 |        | 1.1228 | 0.0631 | 0.4124 | 0.0341 | 0.2097 |        |
| 4515 | 0.0912 |        | 0.7548 | 0.5722 | 0.4441 |        | 0.1184 | 1.3111 | 0.0579 | 0.1115 |        |

7. APPENDICES

7.1 Test Article Certificate of Analysis

12111 Parklawn Drive  
 Rockville, MD 20852  
 (301)251-6638  
[www.vigenebio.com](http://www.vigenebio.com)



**PRODUCT INFORMATION & CERTIFICATE OF ANALYSIS**

**PRODUCT INFORMATION**

**Tox Lot scAAV9-CLN7 virus production and purification**

**Date: September 8<sup>th</sup> 2018**

**SHELF LIFE: 2 years from date of receipt under proper storage conditions**

**SHIPMENT SPECIFICATION & HANDLING INSTRUCTION**

| Quantity | Description | Volume/titer                |
|----------|-------------|-----------------------------|
| 50       | AAV9/CLN7   | 200µl X 50<br>1.09+14GC /mL |

**FORMULATION BUFFER**

PBS, 5% Sorbitol, pH 7.4 containing 0.001%F-68

| Test                       | Specification | Result               | Unit  |
|----------------------------|---------------|----------------------|-------|
| Viral genome titer (qPCR)  | ≥1E+14 GC/mL  | 1.09E+14 (±1.76E+13) | GC/mL |
| Residual Host Cell Protein | Report result | <LOD                 | ng/mL |
| Residual HCD               | Report result | 369±96               | ng/mL |
| Residual Benzonase         | Report result | <LOD (0.7)           | ng/mL |
| Endotoxin                  | <10           | 2.7±0.8              | ng/mL |
| pH                         | 7.4±0.3       | 7.4                  |       |
| Appearance                 | Clear         | Clear                |       |

Senior PD Director: MAN-SHIOW JIANG, PH.D.
